# Supplementary material for: Physics-informed neural network-based prediction of permeation performance in reverse osmosis membrane elements
Source: Royal Society of Chemistry journal article supplement (doi:10.1039/d5ew00634a), 2025-01-01
Supplement: d5ew00634a1.xlsx [file d5ew00634a1.xlsx]

## Sheet: 膜污染A和B变化数据
Time	Feed Flow Rate（L/h）	Brine Flow Rate（L/h）	Permeate Flow Rate（L/h）	Feed Pressure（Mpa）	Brine Pressure（Mpa）	Permeate Pressure（Mpa）	Feed Concentration（mg/L）	Permeate Concentration（mg/L）	Temperature（℃）
08:30:01	338.544	76.4441	218.415	0.877227	0.869201	0.00171806	2000.68	51.57	29.3
09:30:01	349.465	76.4441	218.415	0.877227	0.869315	0.00180848	2000.57	52.49	29.3
10:30:01	349.465	87.3648	218.415	0.877114	0.869089	0.00171806	2000.68	52.49	29.3
11:30:01	338.544	76.4441	229.335	0.877001	0.869089	0.00176327	2000.62	52.57	29.3
12:30:01	349.465	87.3648	218.415	0.877227	0.869089	0.00176327	2000.66	52.57	29.3
13:30:01	349.465	76.4441	218.415	0.877001	0.869089	0.00180848	2000.57	52.76	29.3
14:30:01	338.544	76.4441	218.415	0.876888	0.868862	0.00180848	2000.59	52.76	29.3
15:30:01	349.465	87.3648	218.415	0.876775	0.868862	0.00176327	2000.62	52.81	29.3
16:30:01	338.544	76.4441	218.415	0.877001	0.868862	0.00176327	2000.66	52.81	29.3
17:30:01	349.465	76.4441	218.415	0.876888	0.868976	0.00171806	2000.66	52.81	29.3
18:30:01	338.544	87.3648	218.415	0.876548	0.868749	0.00176327	2000.6	52.81	29.3
19:30:01	349.465	76.4441	218.415	0.876548	0.868862	0.00176327	2000.58	52.81	29.3
20:30:01	349.465	87.3648	229.335	0.876661	0.869201	0.00180848	2000.49	52.81	29.3
21:30:01	349.465	76.4441	218.415	0.876775	0.868976	0.00176327	2000.6	52.81	29.3
22:30:01	338.544	76.4441	218.415	0.876775	0.868862	0.00171806	2000.66	52.81	29.3
23:30:01	349.465	87.3648	218.415	0.877227	0.869201	0.00180848	2000.59	52.81	29.3
1900-01-01 00:30:01	338.544	76.4441	218.415	0.877114	0.869201	0.00176327	2000.62	52.81	29.3
1900-01-01 01:30:01	349.465	76.4441	218.415	0.877001	0.868976	0.00176327	2000.64	52.81	29.3
1900-01-01 02:30:01	338.544	87.3648	218.415	0.876888	0.869089	0.00180848	2000.55	52.81	29.3
1900-01-01 03:30:01	349.465	76.4441	229.335	0.876888	0.869089	0.00176327	2000.6	52.81	29.3
1900-01-01 04:30:01	349.465	76.4441	218.415	0.876888	0.868862	0.00180848	2000.59	52.81	29.3
1900-01-01 05:30:01	338.544	87.3648	218.415	0.877453	0.869315	0.00176327	2000.66	53.4	29.3
1900-01-01 06:30:01	349.465	76.4441	218.415	0.87734	0.869201	0.00176327	2000.66	53.4	29.3
1900-01-01 07:30:01	338.544	87.3648	218.415	0.877001	0.869201	0.00180848	2000.55	53.52	29.3
1900-01-01 08:30:01	349.465	76.4441	218.415	0.877227	0.869201	0.00171806	2000.68	53.52	29.4
1900-01-01 09:30:01	338.544	76.4441	229.335	0.876888	0.869201	0.00180848	2000.53	53.63	29.4
1900-01-01 10:30:01	349.465	87.3648	218.415	0.877227	0.869201	0.00176327	2000.64	53.63	29.4
1900-01-01 11:30:01	338.544	76.4441	218.415	0.877001	0.868862	0.00180848	2000.61	53.67	29.4
1900-01-01 12:30:01	349.465	76.4441	218.415	0.877001	0.868976	0.00176327	2000.64	53.67	29.4
1900-01-01 13:30:01	349.465	87.3648	218.415	0.877114	0.868862	0.00176327	2000.68	53.67	29.4
1900-01-01 14:30:01	338.544	76.4441	218.415	0.876888	0.868862	0.00180848	2000.59	53.67	29.4
1900-01-01 15:30:01	349.465	76.4441	218.415	0.876888	0.868862	0.00180848	2000.59	53.67	29.4
1900-01-01 16:30:01	338.544	76.4441	229.335	0.876775	0.868862	0.00176327	2000.62	53.67	29.4
1900-01-01 17:30:01	349.465	87.3648	218.415	0.877001	0.868862	0.00185369	2000.57	53.67	29.4
1900-01-01 18:30:01	349.465	76.4441	218.415	0.876661	0.868749	0.00185369	2000.53	53.67	29.4
1900-01-01 19:30:01	338.544	76.4441	218.415	0.876888	0.868862	0.00176327	2000.64	53.67	29.4
1900-01-01 20:30:01	349.465	87.3648	218.415	0.876548	0.868523	0.00180848	2000.59	53.67	29.4
1900-01-01 21:30:01	338.544	76.4441	218.415	0.876436	0.868636	0.00176327	2000.6	53.67	29.4
1900-01-01 22:30:01	349.465	76.4441	229.335	0.876209	0.868636	0.00176327	2000.56	53.67	29.4
1900-01-01 23:30:01	338.544	87.3648	218.415	0.876548	0.868636	0.00180848	2000.57	53.67	29.4
1900-01-02 00:30:01	349.465	76.4441	218.415	0.876436	0.868523	0.00176327	2000.62	53.67	29.4
1900-01-02 01:30:01	349.465	76.4441	218.415	0.876661	0.868862	0.00176327	2000.6	53.95	29.4
1900-01-02 02:30:01	338.544	76.4441	218.415	0.876548	0.868636	0.00176327	2000.62	53.95	29.4
1900-01-02 03:30:01	349.465	87.3648	218.415	0.876548	0.868749	0.00180848	2000.55	53.96	29.4
1900-01-02 04:30:01	349.465	76.4441	229.335	0.876661	0.868749	0.00180848	2000.57	53.96	29.4
1900-01-02 05:30:01	338.544	76.4441	218.415	0.876775	0.869089	0.00180848	2000.53	53.95	29.4
1900-01-02 06:30:01	349.465	87.3648	218.415	0.876661	0.868862	0.00176327	2000.6	53.95	29.4
1900-01-02 07:30:01	349.465	76.4441	218.415	0.877001	0.868976	0.00176327	2000.64	54.02	29.4
1900-01-02 08:30:01	338.544	76.4441	218.415	0.876775	0.868976	0.00176327	2000.6	54.02	29.4
1900-01-02 09:30:01	349.465	87.3648	218.415	0.876661	0.868862	0.00180848	2000.55	54.02	29.4
1900-01-02 10:30:01	338.544	76.4441	229.335	0.876888	0.868862	0.00176327	2000.64	54.02	29.4
1900-01-02 11:30:01	349.465	87.3648	218.415	0.877227	0.869201	0.00176327	2000.64	54.02	29.4
1900-01-02 12:30:01	349.465	76.4441	218.415	0.877227	0.869315	0.00180848	2000.57	54.02	29.4
1900-01-02 13:30:01	338.544	76.4441	218.415	0.877227	0.869201	0.00180848	2000.59	54.02	29.4
1900-01-02 14:30:01	349.465	87.3648	218.415	0.87734	0.869201	0.00180848	2000.61	54.02	29.4
1900-01-02 15:30:01	338.544	76.4441	229.335	0.87734	0.869541	0.00180848	2000.55	54.02	29.4
1900-01-02 16:30:01	349.465	87.3648	218.415	0.877566	0.869541	0.00180848	2000.59	54.02	29.4
1900-01-02 17:30:01	349.465	76.4441	218.415	0.877792	0.869541	0.00176327	2000.68	54.02	29.4
1900-01-02 18:30:01	338.544	76.4441	218.415	0.877792	0.869767	0.00176327	2000.64	54.02	29.4
1900-01-02 19:30:01	349.465	87.3648	218.415	0.877792	0.869428	0.00176327	2000.7	54.02	29.4
1900-01-02 20:30:01	338.544	76.4441	218.415	0.878131	0.869767	0.00176327	2000.7	54.02	29.4
1900-01-02 21:30:01	349.465	76.4441	229.335	0.877905	0.869767	0.00180848	2000.61	54.18	29.4
1900-01-02 22:30:01	349.465	87.3648	218.415	0.877792	0.86988	0.00180848	2000.57	54.18	29.4
1900-01-02 23:30:01	338.544	76.4441	218.415	0.877792	0.869654	0.00176327	2000.66	54.17	29.4
1900-01-03 00:30:01	349.465	87.3648	218.415	0.877566	0.869654	0.00176327	2000.62	54.17	29.4
1900-01-03 01:30:01	338.544	76.4441	229.335	0.877792	0.869993	0.00176327	2000.6	54.25	29.4
1900-01-03 02:30:01	349.465	76.4441	218.415	0.877792	0.869428	0.00180848	2000.65	54.25	29.4
1900-01-03 03:30:01	338.544	76.4441	218.415	0.877792	0.869767	0.00180848	2000.59	54.27	29.4
1900-01-03 04:30:01	349.465	87.3648	218.415	0.877792	0.869767	0.00176327	2000.64	54.27	29.4
1900-01-03 05:30:01	338.544	76.4441	218.415	0.877679	0.869654	0.00176327	2000.64	54.27	29.4
1900-01-03 06:30:01	349.465	76.4441	229.335	0.877905	0.869993	0.00185369	2000.53	54.27	29.3
1900-01-03 07:30:01	338.544	76.4441	218.415	0.878244	0.869993	0.00180848	2000.63	54.27	29.3
1900-01-03 08:30:01	349.465	87.3648	218.415	0.878131	0.870106	0.00180848	2000.59	54.27	29.3
1900-01-03 09:30:01	338.544	76.4441	218.415	0.878244	0.869993	0.00171806	2000.72	54.27	29.3
1900-01-03 10:30:01	349.465	76.4441	218.415	0.87847	0.870558	0.00176327	2000.62	54.27	29.3
1900-01-03 11:30:01	338.544	87.3648	229.335	0.87847	0.870106	0.00176327	2000.7	54.27	29.3
1900-01-03 12:30:01	349.465	76.4441	218.415	0.878583	0.870671	0.00176327	2000.62	54.27	29.3
1900-01-03 13:30:01	338.544	76.4441	218.415	0.878583	0.870445	0.00171806	2000.71	54.27	29.3
1900-01-03 14:30:01	349.465	76.4441	218.415	0.878809	0.870332	0.00176327	2000.72	54.27	29.3
1900-01-03 15:30:01	349.465	87.3648	218.415	0.878809	0.870784	0.00180848	2000.6	54.27	29.3
1900-01-03 16:30:01	338.544	76.4441	218.415	0.878696	0.870671	0.00180848	2000.6	54.27	29.3
1900-01-03 17:30:01	349.465	76.4441	229.335	0.879148	0.870897	0.00180848	2000.64	54.4	29.3
1900-01-03 18:30:01	338.544	76.4441	218.415	0.8796	0.871236	0.00171806	2000.75	54.4	29.3
1900-01-03 19:30:01	349.465	87.3648	218.415	0.878922	0.870897	0.00180848	2000.6	54.51	29.3
1900-01-03 20:30:01	338.544	76.4441	218.415	0.879148	0.870784	0.00180848	2000.66	54.51	29.3
1900-01-03 21:30:01	349.465	76.4441	218.415	0.878922	0.870671	0.00180848	2000.64	54.51	29.3
1900-01-03 22:30:01	338.544	87.3648	218.415	0.878583	0.870558	0.00185369	2000.55	54.57	29.3
1900-01-03 23:30:01	349.465	76.4441	229.335	0.878809	0.870671	0.00180848	2000.62	54.57	29.3
1900-01-04 00:30:01	338.544	76.4441	218.415	0.878809	0.870897	0.00180848	2000.58	54.6	29.3
1900-01-04 01:30:01	338.544	76.4441	218.415	0.879261	0.87101	0.00176327	2000.68	54.6	29.3
1900-01-04 02:30:01	349.465	87.3648	218.415	0.878696	0.870671	0.00185369	2000.55	54.6	29.3
1900-01-04 03:30:01	338.544	76.4441	218.415	0.879261	0.870897	0.00176327	2000.7	54.6	29.3
1900-01-04 04:30:01	349.465	76.4441	218.415	0.878922	0.87101	0.00180848	2000.58	54.6	29.3
1900-01-04 05:30:01	338.544	76.4441	218.415	0.879261	0.87101	0.00176327	2000.68	54.6	29.3
1900-01-04 06:30:01	349.465	87.3648	229.335	0.879374	0.871123	0.00176327	2000.68	54.6	29.3
1900-01-04 07:30:01	338.544	76.4441	218.415	0.879487	0.871349	0.00176327	2000.66	54.6	29.3
1900-01-04 08:30:01	349.465	76.4441	218.415	0.8796	0.871236	0.00180848	2000.66	54.6	29.3
1900-01-04 09:30:01	338.544	76.4441	218.415	0.879374	0.871123	0.00176327	2000.68	54.6	29.3
1900-01-04 10:30:01	338.544	87.3648	218.415	0.879826	0.871575	0.00176327	2000.68	54.6	29.3
1900-01-04 11:30:01	349.465	76.4441	218.415	0.879374	0.871236	0.00176327	2000.66	54.6	29.3
1900-01-04 12:30:01	338.544	76.4441	218.415	0.879374	0.871236	0.00180848	2000.62	54.6	29.3
1900-01-04 13:30:01	349.465	76.4441	218.415	0.879487	0.871236	0.00176327	2000.68	54.6	29.3
1900-01-04 14:30:01	338.544	87.3648	218.415	0.878922	0.87101	0.00180848	2000.58	54.92	29.3
1900-01-04 15:30:01	338.544	76.4441	218.415	0.879374	0.871123	0.00176327	2000.68	54.92	29.3
1900-01-04 16:30:01	349.465	76.4441	218.415	0.879713	0.871575	0.00176327	2000.66	54.94	29.3
1900-01-04 17:30:01	338.544	76.4441	229.335	0.879939	0.871349	0.00176327	2000.74	54.94	29.3
1900-01-04 18:30:01	338.544	76.4441	218.415	0.879487	0.871462	0.00176327	2000.64	54.9	29.3
1900-01-04 19:30:01	349.465	76.4441	218.415	0.879487	0.871349	0.00180848	2000.62	54.9	29.3
1900-01-04 20:30:01	338.544	76.4441	218.415	0.879374	0.871236	0.00176327	2000.66	55.01	29.3
1900-01-04 21:30:01	338.544	76.4441	218.415	0.8796	0.871462	0.00180848	2000.62	55.01	29.3
1900-01-04 22:30:01	349.465	87.3648	218.415	0.879939	0.871575	0.00180848	2000.66	55.01	29.3
1900-01-04 23:30:01	338.544	76.4441	218.415	0.879713	0.871349	0.00180848	2000.66	55.01	29.3
1900-01-05 00:30:01	338.544	76.4441	218.415	0.8796	0.871575	0.00176327	2000.64	55.01	29.3
1900-01-05 01:30:01	338.544	76.4441	218.415	0.879826	0.871688	0.00180848	2000.62	55.01	29.3
1900-01-05 02:30:01	349.465	76.4441	218.415	0.879713	0.871688	0.00176327	2000.64	55.01	29.3
1900-01-05 03:30:01	338.544	76.4441	218.415	0.8796	0.871462	0.00180848	2000.62	55.01	29.3
1900-01-05 04:30:01	338.544	76.4441	218.415	0.8796	0.871575	0.00185369	2000.55	55.01	29.3
1900-01-05 05:30:01	349.465	76.4441	218.415	0.879374	0.871349	0.00180848	2000.6	55.01	29.3
1900-01-05 06:30:01	338.544	87.3648	218.415	0.879713	0.871575	0.00176327	2000.66	55.01	29.3
1900-01-05 07:30:01	338.544	76.4441	218.415	0.879713	0.871575	0.00180848	2000.62	55.01	29.3
1900-01-05 08:30:01	349.465	76.4441	218.415	0.8796	0.871575	0.00176327	2000.64	55.01	29.3
1900-01-05 09:30:01	338.544	76.4441	218.415	0.879713	0.871688	0.00176327	2000.64	55.01	29.3
1900-01-05 10:30:01	338.544	76.4441	218.415	0.879939	0.871688	0.00176327	2000.68	55.37	29.3
1900-01-05 11:30:01	349.465	76.4441	207.494	0.879713	0.871575	0.00180848	2000.62	55.37	29.3
1900-01-05 12:30:01	338.544	76.4441	218.415	0.880391	0.872027	0.00185369	2000.61	55.44	29.3
1900-01-05 13:30:01	338.544	76.4441	218.415	0.880052	0.871914	0.00176327	2000.66	55.44	29.3
1900-01-05 14:30:01	338.544	76.4441	218.415	0.880391	0.871914	0.00176327	2000.72	55.52	29.3
1900-01-05 15:30:01	349.465	76.4441	218.415	0.880052	0.871801	0.00176327	2000.68	55.52	29.3
1900-01-05 16:30:01	338.544	76.4441	218.415	0.880505	0.87214	0.00180848	2000.66	55.52	29.3
1900-01-05 17:30:01	338.544	76.4441	218.415	0.880505	0.872253	0.00180848	2000.64	55.52	29.3
1900-01-05 18:30:01	338.544	76.4441	218.415	0.880505	0.87214	0.00180848	2000.66	55.52	29.3
1900-01-05 19:30:01	349.465	76.4441	218.415	0.880505	0.872253	0.00176327	2000.68	55.52	29.3
1900-01-05 20:30:01	338.544	87.3648	218.415	0.880844	0.872706	0.00171806	2000.71	55.52	29.3
1900-01-05 21:30:01	338.544	76.4441	218.415	0.880618	0.87214	0.00180848	2000.68	55.52	29.3
1900-01-05 22:30:01	349.465	76.4441	218.415	0.880731	0.872366	0.00180848	2000.66	55.52	29.3
1900-01-05 23:30:01	338.544	76.4441	218.415	0.880278	0.87214	0.00180848	2000.62	55.52	29.3
1900-01-06 00:30:01	338.544	76.4441	218.415	0.880505	0.87214	0.00176327	2000.7	55.52	29.3
1900-01-06 01:30:01	338.544	76.4441	218.415	0.880391	0.87214	0.00176327	2000.68	55.52	29.3
1900-01-06 02:30:01	338.544	76.4441	218.415	0.880391	0.87214	0.00185369	2000.59	55.52	29.3
1900-01-06 03:30:01	349.465	76.4441	207.494	0.880505	0.872253	0.00176327	2000.68	55.52	29.3
1900-01-06 04:30:01	338.544	76.4441	218.415	0.880278	0.87214	0.00180848	2000.62	55.52	29.3
1900-01-06 05:30:01	338.544	87.3648	218.415	0.880391	0.872253	0.00185369	2000.57	55.52	29.3
1900-01-06 06:30:01	338.544	76.4441	218.415	0.880505	0.872253	0.00180848	2000.64	56.06	29.3
1900-01-06 07:30:01	338.544	76.4441	218.415	0.880618	0.87214	0.00185369	2000.63	56.06	29.3
1900-01-06 08:30:01	349.465	76.4441	218.415	0.880505	0.872366	0.00185369	2000.57	56.12	29.3
1900-01-06 09:30:01	338.544	76.4441	218.415	0.880618	0.87214	0.00180848	2000.68	56.12	29.3
1900-01-06 10:30:01	338.544	76.4441	218.415	0.880278	0.872027	0.00185369	2000.59	56.27	29.3
1900-01-06 11:30:01	338.544	76.4441	207.494	0.880166	0.87214	0.00171806	2000.69	56.27	29.3
1900-01-06 12:30:01	338.544	76.4441	218.415	0.879826	0.871914	0.00176327	2000.62	56.3	29.3
1900-01-06 13:30:01	338.544	76.4441	218.415	0.880166	0.871914	0.00180848	2000.64	56.3	29.3
1900-01-06 14:30:01	349.465	76.4441	218.415	0.880505	0.87214	0.00180848	2000.66	56.3	29.3
1900-01-06 15:30:01	338.544	76.4441	218.415	0.880278	0.872027	0.00176327	2000.68	56.3	29.3
1900-01-06 16:30:01	338.544	76.4441	218.415	0.880391	0.87214	0.00180848	2000.64	56.3	29.3
1900-01-06 17:30:01	338.544	87.3648	218.415	0.880052	0.871914	0.00176327	2000.66	56.3	29.3
1900-01-06 18:30:01	338.544	76.4441	218.415	0.880618	0.872253	0.00180848	2000.66	56.3	29.3
1900-01-06 19:30:01	338.544	76.4441	218.415	0.880391	0.87214	0.00180848	2000.64	56.3	29.3
1900-01-06 20:30:01	338.544	76.4441	207.494	0.880278	0.87214	0.00180848	2000.62	56.3	29.3
1900-01-06 21:30:01	338.544	76.4441	218.415	0.880278	0.87214	0.00180848	2000.62	56.3	29.3
1900-01-06 22:30:01	338.544	76.4441	218.415	0.880391	0.87214	0.00180848	2000.64	56.3	29.3
1900-01-06 23:30:01	338.544	76.4441	218.415	0.880391	0.872253	0.00176327	2000.66	56.3	29.3
1900-01-07 00:30:01	338.544	76.4441	218.415	0.880391	0.872253	0.00180848	2000.62	56.3	29.3
1900-01-07 01:30:01	338.544	76.4441	218.415	0.880278	0.87214	0.00176327	2000.66	56.3	29.3
1900-01-07 02:30:01	338.544	76.4441	218.415	0.880166	0.872027	0.00180848	2000.62	56.68	29.3
1900-01-07 03:30:01	338.544	76.4441	207.494	0.880391	0.872253	0.00180848	2000.62	56.68	29.3
1900-01-07 04:30:01	338.544	76.4441	218.415	0.880052	0.872027	0.00180848	2000.6	56.86	29.3
1900-01-07 05:30:01	349.465	76.4441	218.415	0.880166	0.872027	0.00180848	2000.62	56.86	29.3
1900-01-07 06:30:01	338.544	76.4441	218.415	0.880278	0.871914	0.00176327	2000.7	56.91	29.3
1900-01-07 07:30:01	338.544	76.4441	218.415	0.879939	0.871801	0.00176327	2000.66	56.91	29.3
1900-01-07 08:30:01	338.544	76.4441	218.415	0.880052	0.871688	0.00185369	2000.61	56.82	29.3
1900-01-07 09:30:01	338.544	76.4441	218.415	0.879826	0.871914	0.00180848	2000.58	56.82	29.3
1900-01-07 10:30:01	349.465	76.4441	207.494	0.879939	0.871688	0.00185369	2000.59	56.82	29.3
1900-01-07 11:30:01	338.544	76.4441	218.415	0.879487	0.871462	0.00180848	2000.6	56.82	29.3
1900-01-07 12:30:01	338.544	76.4441	218.415	0.879713	0.871462	0.00185369	2000.59	56.82	29.3
1900-01-07 13:30:01	338.544	76.4441	218.415	0.879826	0.871688	0.00180848	2000.62	56.82	29.3
1900-01-07 14:30:01	338.544	76.4441	218.415	0.879487	0.871462	0.00180848	2000.6	56.82	29.3
1900-01-07 15:30:01	338.544	65.5234	218.415	0.879713	0.871462	0.00176327	2000.68	56.82	29.3
1900-01-07 16:30:01	338.544	76.4441	207.494	0.879487	0.871575	0.00180848	2000.58	56.82	29.3
1900-01-07 17:30:01	338.544	76.4441	218.415	0.8796	0.871462	0.00180848	2000.62	56.82	29.3
1900-01-07 18:30:01	338.544	76.4441	218.415	0.8796	0.871575	0.00185369	2000.55	56.82	29.3
1900-01-07 19:30:01	338.544	76.4441	218.415	0.879487	0.871462	0.00180848	2000.6	56.82	29.3
1900-01-07 20:30:01	349.465	76.4441	218.415	0.879261	0.871462	0.00180848	2000.56	56.82	29.3
1900-01-07 21:30:01	338.544	76.4441	218.415	0.878922	0.871123	0.00171806	2000.65	56.82	29.3
1900-01-07 22:30:01	338.544	76.4441	218.415	0.879374	0.871462	0.00176327	2000.62	57.14	29.3
1900-01-07 23:30:01	338.544	65.5234	207.494	0.878922	0.871236	0.00180848	2000.54	57.14	29.3
1900-01-08 00:30:01	338.544	76.4441	218.415	0.879374	0.871349	0.00180848	2000.6	57.11	29.3
1900-01-08 01:30:01	338.544	76.4441	218.415	0.879487	0.871575	0.00176327	2000.62	57.11	29.3
1900-01-08 02:30:01	349.465	76.4441	218.415	0.879035	0.871123	0.00185369	2000.53	57.11	29.3
1900-01-08 03:30:01	338.544	76.4441	218.415	0.879487	0.871575	0.00185369	2000.53	57.21	29.3
1900-01-08 04:30:01	338.544	76.4441	218.415	0.879374	0.871462	0.00176327	2000.62	57.19	29.3
1900-01-08 05:30:01	338.544	76.4441	218.415	0.879374	0.871688	0.00180848	2000.54	57.19	29.3
1900-01-08 06:30:01	338.544	65.5234	207.494	0.879374	0.871462	0.00180848	2000.58	57.19	29.3
1900-01-08 07:30:01	338.544	76.4441	218.415	0.8796	0.871801	0.00180848	2000.56	57.19	29.3
1900-01-08 08:30:01	338.544	76.4441	218.415	0.879826	0.871688	0.00180848	2000.62	57.19	29.3
1900-01-08 09:30:01	327.623	76.4441	218.415	0.8796	0.871575	0.00180848	2000.6	57.19	29.3
1900-01-08 10:30:01	338.544	76.4441	218.415	0.879826	0.871801	0.00180848	2000.6	57.19	29.3
1900-01-08 11:30:01	349.465	76.4441	218.415	0.879826	0.871801	0.00180848	2000.6	57.19	29.3
1900-01-08 12:30:01	338.544	76.4441	218.415	0.879939	0.872027	0.00180848	2000.58	57.19	29.3
1900-01-08 13:30:01	338.544	76.4441	218.415	0.879939	0.871914	0.00185369	2000.55	57.19	29.3
1900-01-08 14:30:01	338.544	76.4441	218.415	0.880166	0.872027	0.00180848	2000.62	57.19	29.3
1900-01-08 15:30:01	338.544	65.5234	207.494	0.880052	0.872366	0.00180848	2000.54	57.19	29.3
1900-01-08 16:30:01	338.544	76.4441	218.415	0.879713	0.871688	0.00176327	2000.64	57.19	29.3
1900-01-08 17:30:01	338.544	76.4441	218.415	0.880052	0.872027	0.00189891	2000.51	57.19	29.3
1900-01-08 18:30:01	338.544	76.4441	218.415	0.880391	0.87214	0.00176327	2000.68	57.55	29.3
1900-01-08 19:30:01	338.544	76.4441	218.415	0.880505	0.872366	0.00180848	2000.62	57.55	29.3
1900-01-08 20:30:01	338.544	76.4441	218.415	0.880052	0.87214	0.00185369	2000.53	57.55	29.3
1900-01-08 21:30:01	338.544	76.4441	218.415	0.880391	0.872253	0.00180848	2000.62	57.58	29.3
1900-01-08 22:30:01	338.544	76.4441	218.415	0.880731	0.872253	0.00185369	2000.63	57.58	29.3
1900-01-08 23:30:01	338.544	65.5234	207.494	0.880391	0.872253	0.00180848	2000.62	57.62	29.3
1900-01-09 00:30:01	327.623	76.4441	218.415	0.880731	0.872479	0.00176327	2000.68	57.62	29.3
1900-01-09 01:30:01	349.465	76.4441	218.415	0.880618	0.872253	0.00180848	2000.66	57.73	29.3
1900-01-09 02:30:01	327.623	76.4441	218.415	0.880505	0.872366	0.00185369	2000.57	57.73	29.3
1900-01-09 03:30:01	338.544	76.4441	218.415	0.880505	0.872819	0.00185369	2000.49	57.73	29.3
1900-01-09 04:30:01	338.544	76.4441	218.415	0.881183	0.872819	0.00185369	2000.61	57.73	29.3
1900-01-09 05:30:01	338.544	65.5234	218.415	0.880957	0.872819	0.00180848	2000.62	57.73	29.3
1900-01-09 06:30:01	338.544	76.4441	218.415	0.880731	0.872479	0.00180848	2000.64	57.73	29.3
1900-01-09 07:30:01	338.544	76.4441	218.415	0.88107	0.872819	0.00180848	2000.64	57.73	29.3
1900-01-09 08:30:01	349.465	76.4441	218.415	0.880957	0.872706	0.00185369	2000.59	57.73	29.3
1900-01-09 09:30:01	338.544	76.4441	218.415	0.881296	0.872819	0.00180848	2000.68	57.73	29.3
1900-01-09 10:30:01	338.544	65.5234	207.494	0.881522	0.872931	0.00180848	2000.7	57.73	29.3
1900-01-09 11:30:01	338.544	76.4441	218.415	0.881635	0.873497	0.00180848	2000.62	57.73	29.3
1900-01-09 12:30:01	338.544	76.4441	218.415	0.881635	0.873158	0.00180848	2000.68	57.73	29.3
1900-01-09 13:30:01	338.544	76.4441	218.415	0.88107	0.873045	0.00185369	2000.55	57.73	29.3
1900-01-09 14:30:01	338.544	76.4441	218.415	0.881522	0.873384	0.00180848	2000.62	57.73	29.3
1900-01-09 15:30:01	327.623	65.5234	218.415	0.881409	0.873271	0.00185369	2000.57	57.89	29.3
1900-01-09 16:30:01	338.544	76.4441	218.415	0.881409	0.873158	0.00180848	2000.64	57.89	29.3
1900-01-09 17:30:01	349.465	76.4441	218.415	0.881635	0.873158	0.00185369	2000.63	58.01	29.3
1900-01-09 18:30:01	327.623	76.4441	207.494	0.881635	0.873271	0.00180848	2000.66	58.01	29.3
1900-01-09 19:30:01	338.544	65.5234	218.415	0.881748	0.87361	0.00180848	2000.62	58.13	29.3
1900-01-09 20:30:01	338.544	76.4441	218.415	0.881635	0.873497	0.00180848	2000.62	58.13	29.3
1900-01-09 21:30:01	338.544	76.4441	218.415	0.8822	0.873723	0.00185369	2000.63	58.05	29.3
1900-01-09 22:30:01	338.544	76.4441	218.415	0.882087	0.873723	0.00176327	2000.71	58.05	29.3
1900-01-09 23:30:01	338.544	76.4441	218.415	0.882087	0.873836	0.00176327	2000.69	58.05	29.3
1900-01-10 00:30:01	327.623	65.5234	218.415	0.881861	0.87361	0.00185369	2000.59	58.05	29.3
1900-01-10 01:30:01	338.544	76.4441	207.494	0.882426	0.874062	0.00180848	2000.66	58.05	29.3
1900-01-10 02:30:01	338.544	76.4441	207.494	0.882313	0.873949	0.00185369	2000.62	58.05	29.3
1900-01-10 03:30:01	338.544	76.4441	218.415	0.8822	0.873949	0.00185369	2000.6	58.05	29.3
1900-01-10 04:30:01	327.623	76.4441	218.415	0.882313	0.873836	0.00180848	2000.68	58.05	29.3
1900-01-10 05:30:01	338.544	65.5234	218.415	0.8822	0.873949	0.00180848	2000.64	58.05	29.3
1900-01-10 06:30:01	338.544	76.4441	218.415	0.882426	0.873949	0.00176327	2000.73	58.05	29.3
1900-01-10 07:30:01	338.544	76.4441	207.494	0.882313	0.874175	0.00180848	2000.62	58.05	29.3
1900-01-10 08:30:01	338.544	65.5234	218.415	0.882539	0.874175	0.00180848	2000.66	58.05	29.3
1900-01-10 09:30:01	327.623	76.4441	218.415	0.882765	0.874514	0.00176327	2000.69	58.05	29.3
1900-01-10 10:30:01	338.544	76.4441	218.415	0.882652	0.874514	0.00180848	2000.62	58.05	29.3
1900-01-10 11:30:01	338.544	76.4441	218.415	0.882426	0.874288	0.00185369	2000.58	58.45	29.3
1900-01-10 12:30:01	338.544	65.5234	218.415	0.882652	0.874288	0.00180848	2000.66	58.45	29.3
1900-01-10 13:30:01	338.544	76.4441	207.494	0.882765	0.874288	0.00185369	2000.64	58.46	29.3
1900-01-10 14:30:01	327.623	76.4441	218.415	0.882765	0.874288	0.00180848	2000.68	58.46	29.3
1900-01-10 15:30:01	338.544	65.5234	218.415	0.882991	0.874627	0.00180848	2000.66	58.5	29.3
1900-01-10 16:30:01	327.623	76.4441	218.415	0.882878	0.874514	0.00185369	2000.62	58.5	29.3
1900-01-10 17:30:01	338.544	76.4441	207.494	0.882991	0.874627	0.00180848	2000.66	58.51	29.3
1900-01-10 18:30:01	338.544	65.5234	218.415	0.882652	0.874288	0.00180848	2000.66	58.51	29.3
1900-01-10 19:30:01	338.544	76.4441	218.415	0.882765	0.874401	0.00176327	2000.71	58.51	29.3
1900-01-10 20:30:01	327.623	76.4441	218.415	0.882765	0.874401	0.00180848	2000.66	58.51	29.3
1900-01-10 21:30:01	338.544	76.4441	218.415	0.882878	0.874401	0.00180848	2000.68	58.51	29.3
1900-01-10 22:30:01	327.623	65.5234	207.494	0.883443	0.874966	0.00185369	2000.64	58.51	29.3
1900-01-10 23:30:01	338.544	76.4441	218.415	0.882991	0.87474	0.00180848	2000.64	58.51	29.3
1900-01-11 00:30:01	338.544	76.4441	218.415	0.883217	0.87474	0.00185369	2000.64	58.51	29.3
1900-01-11 01:30:01	327.623	65.5234	207.494	0.883556	0.875079	0.00180848	2000.68	58.51	29.3
1900-01-11 02:30:01	338.544	76.4441	218.415	0.883556	0.874966	0.00180848	2000.7	58.51	29.3
1900-01-11 03:30:01	338.544	76.4441	218.415	0.883217	0.874853	0.00176327	2000.71	58.51	29.3
1900-01-11 04:30:01	327.623	65.5234	218.415	0.883217	0.874966	0.00176327	2000.69	58.51	29.3
1900-01-11 05:30:01	338.544	76.4441	207.494	0.883669	0.875192	0.00180848	2000.68	58.51	29.3
1900-01-11 06:30:01	338.544	76.4441	218.415	0.883669	0.875079	0.00180848	2000.7	58.51	29.3
1900-01-11 07:30:01	327.623	65.5234	218.415	0.883443	0.874966	0.00176327	2000.73	58.97	29.3
1900-01-11 08:30:01	338.544	76.4441	207.494	0.88333	0.875079	0.00180848	2000.64	58.97	29.3
1900-01-11 09:30:01	327.623	76.4441	218.415	0.883217	0.875305	0.00185369	2000.54	59.13	29.3
1900-01-11 10:30:01	338.544	65.5234	218.415	0.883782	0.875418	0.00180848	2000.66	59.13	29.3
1900-01-11 11:30:01	327.623	76.4441	207.494	0.883669	0.875192	0.00176327	2000.73	59.14	29.3
1900-01-11 12:30:01	338.544	76.4441	218.415	0.883556	0.875192	0.00180848	2000.66	59.14	29.3
1900-01-11 13:30:01	338.544	65.5234	218.415	0.883669	0.875192	0.00180848	2000.68	59.24	29.3
1900-01-11 14:30:01	327.623	76.4441	207.494	0.883895	0.875418	0.00176327	2000.73	59.24	29.3
1900-01-11 15:30:01	338.544	76.4441	218.415	0.883895	0.875418	0.00176327	2000.73	59.24	29.3
1900-01-11 16:30:01	338.544	65.5234	218.415	0.884122	0.875531	0.00180848	2000.7	59.24	29.3
1900-01-11 17:30:01	327.623	76.4441	207.494	0.883669	0.875192	0.00180848	2000.68	59.24	29.3
1900-01-11 18:30:01	338.544	76.4441	218.415	0.883895	0.875531	0.00176327	2000.71	59.24	29.3
1900-01-11 19:30:01	327.623	65.5234	207.494	0.883217	0.874966	0.00176327	2000.69	59.24	29.3
1900-01-11 20:30:01	338.544	76.4441	218.415	0.883443	0.875192	0.00185369	2000.6	59.24	29.3
1900-01-11 21:30:01	327.623	76.4441	218.415	0.883556	0.875079	0.00180848	2000.68	59.24	29.3
1900-01-11 22:30:01	338.544	65.5234	207.494	0.883669	0.875305	0.00185369	2000.62	59.24	29.3
1900-01-11 23:30:01	327.623	76.4441	218.415	0.883782	0.875531	0.00185369	2000.6	59.24	29.3
1900-01-12 00:30:01	338.544	65.5234	207.494	0.883556	0.875305	0.00176327	2000.69	59.24	29.3
1900-01-12 01:30:01	327.623	76.4441	218.415	0.883895	0.875418	0.00180848	2000.68	59.24	29.3
1900-01-12 02:30:01	338.544	76.4441	207.494	0.883669	0.875418	0.00180848	2000.64	59.24	29.3
1900-01-12 03:30:01	327.623	65.5234	218.415	0.883895	0.87587	0.00171806	2000.69	59.72	29.3
1900-01-12 04:30:01	327.623	76.4441	207.494	0.884008	0.875531	0.00180848	2000.68	59.72	29.3
1900-01-12 05:30:01	327.623	65.5234	218.415	0.884008	0.875644	0.00176327	2000.71	59.87	29.3
1900-01-12 06:30:01	338.544	76.4441	218.415	0.883782	0.875531	0.00185369	2000.6	59.87	29.3
1900-01-12 07:30:01	327.623	65.5234	207.494	0.883895	0.875531	0.00185369	2000.62	59.98	29.3
1900-01-12 08:30:01	327.623	76.4441	218.415	0.884122	0.875644	0.00180848	2000.68	59.98	29.3
1900-01-12 09:30:01	338.544	76.4441	207.494	0.884122	0.875644	0.00180848	2000.68	59.93	29.3
1900-01-12 10:30:01	327.623	65.5234	218.415	0.884348	0.875983	0.00180848	2000.66	59.93	29.3
1900-01-12 11:30:01	327.623	76.4441	207.494	0.884122	0.875644	0.00180848	2000.68	59.93	29.3
1900-01-12 12:30:01	338.544	65.5234	218.415	0.884008	0.875757	0.00185369	2000.6	59.93	29.3
1900-01-12 13:30:01	327.623	76.4441	207.494	0.884008	0.875418	0.00180848	2000.7	59.93	29.3
1900-01-12 14:30:01	327.623	65.5234	218.415	0.883782	0.875531	0.00180848	2000.64	59.93	29.3
1900-01-12 15:30:01	338.544	76.4441	207.494	0.884008	0.875644	0.00180848	2000.66	59.93	29.3
1900-01-12 16:30:01	327.623	76.4441	218.415	0.884122	0.875757	0.00180848	2000.66	59.93	29.3
1900-01-12 17:30:01	327.623	65.5234	207.494	0.883895	0.875644	0.00180848	2000.64	59.93	29.3
1900-01-12 18:30:01	327.623	76.4441	218.415	0.884008	0.875757	0.00180848	2000.64	59.93	29.3
1900-01-12 19:30:01	338.544	65.5234	207.494	0.884008	0.875757	0.00180848	2000.64	59.93	29.3
1900-01-12 20:30:01	327.623	76.4441	218.415	0.884122	0.87587	0.00180848	2000.64	59.93	29.3
1900-01-12 21:30:01	327.623	65.5234	207.494	0.884235	0.87587	0.00180848	2000.66	59.93	29.3
1900-01-12 22:30:01	327.623	76.4441	218.415	0.884235	0.87587	0.00185369	2000.62	59.93	29.3
1900-01-12 23:30:01	338.544	65.5234	207.494	0.884461	0.876322	0.00180848	2000.62	60.47	29.3
1900-01-13 00:30:01	327.623	76.4441	218.415	0.884348	0.87587	0.00171806	2000.77	60.47	29.3
1900-01-13 01:30:01	338.544	65.5234	207.494	0.884461	0.876096	0.00180848	2000.66	60.47	29.3
1900-01-13 02:30:01	327.623	76.4441	218.415	0.8848	0.876096	0.00180848	2000.72	60.47	29.3
1900-01-13 03:30:01	327.623	65.5234	207.494	0.884687	0.876436	0.00176327	2000.69	60.68	29.3
1900-01-13 04:30:01	338.544	76.4441	207.494	0.884913	0.876322	0.00180848	2000.7	60.68	29.3
1900-01-13 05:30:01	327.623	65.5234	218.415	0.885026	0.876548	0.00180848	2000.68	60.71	29.3
1900-01-13 06:30:01	327.623	76.4441	207.494	0.884574	0.876096	0.00180848	2000.68	60.71	29.3
1900-01-13 07:30:01	327.623	65.5234	218.415	0.885026	0.876661	0.00180848	2000.67	60.71	29.3
1900-01-13 08:30:01	338.544	65.5234	207.494	0.884574	0.876548	0.00185369	2000.56	60.71	29.3
1900-01-13 09:30:01	327.623	76.4441	218.415	0.884687	0.876209	0.00180848	2000.68	60.71	29.3
1900-01-13 10:30:01	327.623	65.5234	207.494	0.884913	0.876548	0.00180848	2000.66	60.71	29.3
1900-01-13 11:30:01	338.544	65.5234	218.415	0.884913	0.876436	0.00180848	2000.68	60.71	29.3
1900-01-13 12:30:01	327.623	76.4441	207.494	0.885139	0.876775	0.00176327	2000.71	60.71	29.3
1900-01-13 13:30:01	327.623	65.5234	207.494	0.885139	0.876775	0.00176327	2000.71	60.71	29.3
1900-01-13 14:30:01	327.623	76.4441	218.415	0.885026	0.876661	0.00180848	2000.67	60.71	29.3
1900-01-13 15:30:01	327.623	65.5234	207.494	0.8848	0.876436	0.00180848	2000.66	60.71	29.3
1900-01-13 16:30:01	338.544	65.5234	218.415	0.884913	0.876661	0.00185369	2000.6	60.71	29.3
1900-01-13 17:30:01	327.623	76.4441	207.494	0.884687	0.876548	0.00180848	2000.62	60.71	29.3
1900-01-13 18:30:01	327.623	65.5234	218.415	0.885365	0.876888	0.00180848	2000.69	60.71	29.3
1900-01-13 19:30:01	327.623	65.5234	207.494	0.884913	0.876548	0.00180848	2000.66	61.14	29.3
1900-01-13 20:30:01	338.544	76.4441	207.494	0.885365	0.876888	0.00180848	2000.69	61.14	29.3
1900-01-13 21:30:01	327.623	65.5234	218.415	0.885252	0.876888	0.00180848	2000.67	61.32	29.3
1900-01-13 22:30:01	327.623	76.4441	207.494	0.885591	0.87734	0.00180848	2000.65	61.32	29.3
1900-01-13 23:30:01	327.623	65.5234	218.415	0.885365	0.876888	0.00180848	2000.69	61.32	29.3
1900-01-14 00:30:01	338.544	76.4441	207.494	0.885478	0.877114	0.00176327	2000.71	61.32	29.3
1900-01-14 01:30:01	327.623	65.5234	218.415	0.885591	0.877227	0.00185369	2000.62	61.32	29.3
1900-01-14 02:30:01	327.623	76.4441	207.494	0.885478	0.877227	0.00180848	2000.65	61.5	29.3
1900-01-14 03:30:01	327.623	76.4441	207.494	0.885252	0.876888	0.00176327	2000.71	61.5	29.3
1900-01-14 04:30:01	327.623	65.5234	218.415	0.885591	0.877001	0.00180848	2000.71	61.5	29.3
1900-01-14 05:30:01	327.623	65.5234	207.494	0.885365	0.877001	0.00176327	2000.71	61.5	29.3
1900-01-14 06:30:01	327.623	76.4441	218.415	0.885365	0.877001	0.00180848	2000.67	61.5	29.3
1900-01-14 07:30:01	327.623	76.4441	207.494	0.885478	0.877227	0.00180848	2000.65	61.5	29.3
1900-01-14 08:30:01	327.623	65.5234	207.494	0.885704	0.877453	0.00180848	2000.65	61.5	29.3
1900-01-14 09:30:01	338.544	76.4441	218.415	0.885365	0.877114	0.00180848	2000.65	61.5	29.3
1900-01-14 10:30:01	327.623	65.5234	207.494	0.885704	0.877453	0.00185369	2000.6	61.5	29.3
1900-01-14 11:30:01	327.623	76.4441	218.415	0.885817	0.877453	0.00185369	2000.62	61.5	29.3
1900-01-14 12:30:01	327.623	76.4441	207.494	0.885704	0.877453	0.00180848	2000.65	61.5	29.3
1900-01-14 13:30:01	327.623	65.5234	218.415	0.885704	0.877566	0.00176327	2000.67	61.5	29.3
1900-01-14 14:30:01	327.623	76.4441	207.494	0.885591	0.877566	0.00180848	2000.61	61.5	29.3
1900-01-14 15:30:01	327.623	65.5234	207.494	0.885591	0.877453	0.00185369	2000.58	61.5	29.3
1900-01-14 16:30:01	338.544	76.4441	218.415	0.885817	0.877566	0.00185369	2000.6	61.91	29.3
1900-01-14 17:30:01	327.623	76.4441	207.494	0.885704	0.87734	0.00180848	2000.67	61.91	29.3
1900-01-14 18:30:01	327.623	65.5234	218.415	0.885704	0.877227	0.00185369	2000.64	62.07	29.3
1900-01-14 19:30:01	327.623	76.4441	207.494	0.885704	0.877453	0.00180848	2000.65	62.07	29.3
1900-01-14 20:30:01	327.623	76.4441	207.494	0.885478	0.87734	0.00180848	2000.63	62.11	29.3
1900-01-14 21:30:01	327.623	65.5234	218.415	0.885704	0.877453	0.00180848	2000.65	62.11	29.3
1900-01-14 22:30:01	327.623	76.4441	207.494	0.885591	0.87734	0.00185369	2000.6	62.21	29.3
1900-01-14 23:30:01	327.623	65.5234	218.415	0.885704	0.877453	0.00180848	2000.65	62.21	29.3
1900-01-15 00:30:01	327.623	76.4441	207.494	0.885478	0.877453	0.00180848	2000.61	62.21	29.3
1900-01-15 01:30:01	327.623	76.4441	207.494	0.885478	0.877453	0.00185369	2000.56	62.21	29.3
1900-01-15 02:30:01	327.623	65.5234	218.415	0.885478	0.877679	0.00180848	2000.57	62.21	29.3
1900-01-15 03:30:01	327.623	76.4441	207.494	0.885817	0.877566	0.00180848	2000.65	62.21	29.3
1900-01-15 04:30:01	327.623	65.5234	218.415	0.88593	0.877679	0.00180848	2000.65	62.21	29.3
1900-01-15 05:30:01	327.623	76.4441	207.494	0.885591	0.87734	0.00185369	2000.6	62.21	29.3
1900-01-15 06:30:01	327.623	65.5234	207.494	0.885478	0.877453	0.00180848	2000.61	62.21	29.3
1900-01-15 07:30:01	327.623	76.4441	218.415	0.885591	0.877679	0.00176327	2000.63	62.21	29.3
1900-01-15 08:30:01	327.623	65.5234	207.494	0.885365	0.877114	0.00180848	2000.65	62.21	29.3
1900-01-15 09:30:01	327.623	76.4441	207.494	0.885591	0.877227	0.00185369	2000.62	62.21	29.3
1900-01-15 10:30:01	327.623	65.5234	218.415	0.885478	0.877453	0.00185369	2000.56	62.21	29.3
1900-01-15 11:30:01	327.623	65.5234	207.494	0.885704	0.877566	0.00185369	2000.58	62.21	29.3
1900-01-15 12:30:01	327.623	76.4441	207.494	0.885704	0.877679	0.00180848	2000.61	62.74	29.3
1900-01-15 13:30:01	327.623	65.5234	218.415	0.885817	0.877566	0.00180848	2000.65	62.74	29.3
1900-01-15 14:30:01	327.623	76.4441	207.494	0.885591	0.877453	0.00180848	2000.63	62.75	29.3
1900-01-15 15:30:01	316.702	65.5234	207.494	0.88593	0.877679	0.00180848	2000.65	62.75	29.3
1900-01-15 16:30:01	327.623	76.4441	218.415	0.885591	0.877453	0.00185369	2000.58	62.87	29.3
1900-01-15 17:30:01	327.623	65.5234	207.494	0.885704	0.877566	0.00185369	2000.58	62.87	29.3
1900-01-15 18:30:01	327.623	76.4441	207.494	0.885817	0.877453	0.00176327	2000.71	62.87	29.3
1900-01-15 19:30:01	327.623	65.5234	218.415	0.885591	0.877453	0.00185369	2000.58	62.87	29.3
1900-01-15 20:30:01	327.623	76.4441	207.494	0.885704	0.877566	0.00180848	2000.63	62.87	29.3
1900-01-15 21:30:01	327.623	65.5234	207.494	0.885704	0.877453	0.00180848	2000.65	62.87	29.3
1900-01-15 22:30:01	327.623	76.4441	218.415	0.885817	0.877566	0.00180848	2000.65	62.87	29.3
1900-01-15 23:30:01	327.623	65.5234	207.494	0.885704	0.877566	0.00185369	2000.58	62.87	29.3
1900-01-16 00:30:01	327.623	76.4441	207.494	0.88593	0.877679	0.00185369	2000.6	62.87	29.3
1900-01-16 01:30:01	327.623	65.5234	218.415	0.88593	0.877905	0.00185369	2000.56	62.87	29.3
1900-01-16 02:30:01	327.623	65.5234	207.494	0.885704	0.877453	0.00180848	2000.65	62.87	29.3
1900-01-16 03:30:01	327.623	76.4441	207.494	0.885817	0.877679	0.00180848	2000.63	62.87	29.3
1900-01-16 04:30:01	327.623	65.5234	218.415	0.885817	0.877792	0.00185369	2000.56	62.87	29.3
1900-01-16 05:30:01	327.623	65.5234	207.494	0.886043	0.877792	0.00180848	2000.65	62.87	29.3
1900-01-16 06:30:01	327.623	76.4441	207.494	0.886043	0.878131	0.00180848	2000.59	62.87	29.3
1900-01-16 07:30:01	327.623	65.5234	218.415	0.886156	0.878018	0.00180848	2000.63	62.87	29.3
1900-01-16 08:30:01	327.623	76.4441	207.494	0.886156	0.877905	0.00180848	2000.65	63.41	29.3
1900-01-16 09:30:01	327.623	65.5234	207.494	0.88593	0.877905	0.00185369	2000.56	63.41	29.3
1900-01-16 10:30:01	327.623	65.5234	218.415	0.886269	0.878244	0.00185369	2000.56	63.45	29.3
1900-01-16 11:30:01	327.623	76.4441	207.494	0.886156	0.878131	0.00185369	2000.56	63.45	29.3
1900-01-16 12:30:01	327.623	65.5234	207.494	0.886269	0.878357	0.00176327	2000.63	63.56	29.3
1900-01-16 13:30:01	327.623	76.4441	207.494	0.886043	0.877905	0.00185369	2000.58	63.56	29.3
1900-01-16 14:30:01	316.702	65.5234	218.415	0.88593	0.877679	0.00185369	2000.6	63.6	29.3
1900-01-16 15:30:01	327.623	65.5234	207.494	0.88593	0.877792	0.00180848	2000.63	63.6	29.3
1900-01-16 16:30:01	327.623	76.4441	207.494	0.886269	0.878244	0.00180848	2000.61	63.6	29.3
1900-01-16 17:30:01	327.623	65.5234	218.415	0.886156	0.878244	0.00180848	2000.59	63.6	29.3
1900-01-16 18:30:01	327.623	76.4441	207.494	0.886382	0.87847	0.00180848	2000.59	63.6	29.3
1900-01-16 19:30:01	327.623	65.5234	207.494	0.886269	0.878131	0.00180848	2000.63	63.6	29.3
1900-01-16 20:30:01	327.623	65.5234	218.415	0.886269	0.878244	0.00180848	2000.61	63.6	29.3
1900-01-16 21:30:01	327.623	76.4441	207.494	0.886495	0.878244	0.00185369	2000.6	63.6	29.3
1900-01-16 22:30:01	327.623	65.5234	207.494	0.886269	0.878131	0.00185369	2000.58	63.6	29.3
1900-01-16 23:30:01	316.702	65.5234	218.415	0.886156	0.878357	0.00185369	2000.52	63.6	29.3
1900-01-17 00:30:01	327.623	76.4441	207.494	0.886156	0.878018	0.00180848	2000.63	63.6	29.3
1900-01-17 01:30:01	327.623	65.5234	207.494	0.886156	0.877905	0.00185369	2000.6	63.6	29.3
1900-01-17 02:30:01	327.623	65.5234	207.494	0.886156	0.878018	0.00185369	2000.58	63.6	29.3
1900-01-17 03:30:01	327.623	65.5234	218.415	0.886495	0.878244	0.00185369	2000.6	63.6	29.3
1900-01-17 04:30:01	327.623	76.4441	207.494	0.886382	0.878244	0.00185369	2000.58	64.1	29.3
1900-01-17 05:30:01	327.623	65.5234	207.494	0.886156	0.877905	0.00185369	2000.6	64.1	29.3
1900-01-17 06:30:01	327.623	65.5234	207.494	0.886382	0.878244	0.00185369	2000.58	64.13	29.3
1900-01-17 07:30:01	316.702	65.5234	218.415	0.886269	0.878244	0.00185369	2000.56	64.13	29.3
1900-01-17 08:30:01	327.623	76.4441	207.494	0.886608	0.878809	0.00180848	2000.57	64.21	29.3
1900-01-17 09:30:01	327.623	65.5234	207.494	0.886608	0.878583	0.00185369	2000.56	64.21	29.3
1900-01-17 10:30:01	327.623	65.5234	218.415	0.886721	0.878922	0.00180848	2000.57	64.19	29.3
1900-01-17 11:30:01	316.702	65.5234	207.494	0.886608	0.878922	0.00171806	2000.64	64.19	29.3
1900-01-17 12:30:01	327.623	76.4441	207.494	0.88706	0.878922	0.00189891	2000.54	64.19	29.3
1900-01-17 13:30:01	327.623	65.5234	207.494	0.886834	0.879035	0.00185369	2000.52	64.19	29.3
1900-01-17 14:30:01	327.623	65.5234	218.415	0.886721	0.878696	0.00185369	2000.56	64.19	29.3
1900-01-17 15:30:01	327.623	76.4441	207.494	0.886947	0.879261	0.00180848	2000.55	64.19	29.3
1900-01-17 16:30:01	316.702	65.5234	207.494	0.886947	0.879148	0.00180848	2000.57	64.19	29.3
1900-01-17 17:30:01	327.623	65.5234	218.415	0.887286	0.879713	0.00185369	2000.48	64.19	29.3
1900-01-17 18:30:01	327.623	65.5234	207.494	0.887173	0.879487	0.00185369	2000.5	64.19	29.3
1900-01-17 19:30:01	316.702	76.4441	207.494	0.887738	0.879826	0.00185369	2000.54	64.19	29.3
1900-01-17 20:30:01	327.623	65.5234	207.494	0.887738	0.879939	0.00180848	2000.57	64.19	29.3
1900-01-17 21:30:01	327.623	65.5234	218.415	0.887625	0.879826	0.00185369	2000.52	64.19	29.3
1900-01-17 22:30:01	327.623	65.5234	207.494	0.888078	0.880391	0.00180848	2000.55	64.19	29.3
1900-01-17 23:30:01	327.623	65.5234	207.494	0.888191	0.880391	0.00185369	2000.53	64.19	29.3
1900-01-18 00:30:01	327.623	76.4441	207.494	0.888417	0.880731	0.00180848	2000.55	64.65	29.3
1900-01-18 01:30:01	316.702	65.5234	218.415	0.888304	0.880731	0.00180848	2000.53	64.65	29.3
1900-01-18 02:30:01	327.623	65.5234	207.494	0.88853	0.88107	0.00180848	2000.51	64.65	29.3
1900-01-18 03:30:01	327.623	65.5234	207.494	0.888643	0.880957	0.00185369	2000.51	64.74	29.3
1900-01-18 04:30:01	327.623	65.5234	218.415	0.888417	0.880618	0.00180848	2000.57	64.74	29.3
1900-01-18 05:30:01	316.702	65.5234	207.494	0.888869	0.881183	0.00180848	2000.55	64.7	29.3
1900-01-18 06:30:01	327.623	65.5234	207.494	0.888869	0.88107	0.00180848	2000.57	64.7	29.3
1900-01-18 07:30:01	327.623	65.5234	218.415	0.888869	0.881409	0.00180848	2000.51	64.86	29.3
1900-01-18 08:30:01	327.623	65.5234	207.494	0.888869	0.881296	0.00185369	2000.49	64.86	29.3
1900-01-18 09:30:01	316.702	65.5234	207.494	0.888756	0.881296	0.00180848	2000.51	64.86	29.3
1900-01-18 10:30:01	327.623	65.5234	218.415	0.888869	0.881296	0.00185369	2000.49	64.86	29.3
1900-01-18 11:30:01	327.623	65.5234	207.494	0.888982	0.881522	0.00185369	2000.47	64.86	29.3
1900-01-18 12:30:01	316.702	65.5234	207.494	0.888982	0.881409	0.00180848	2000.53	64.86	29.3
1900-01-18 13:30:01	327.623	76.4441	218.415	0.888756	0.881183	0.00185369	2000.49	64.86	29.3
1900-01-18 14:30:01	327.623	65.5234	207.494	0.889434	0.882087	0.00180848	2000.49	64.86	29.3
1900-01-18 15:30:01	316.702	65.5234	207.494	0.888869	0.881635	0.00176327	2000.52	64.86	29.3
1900-01-18 16:30:01	327.623	65.5234	207.494	0.888982	0.881409	0.00185369	2000.49	64.86	29.3
1900-01-18 17:30:01	327.623	65.5234	218.415	0.888756	0.881409	0.00185369	2000.45	64.86	29.3
1900-01-18 18:30:01	316.702	65.5234	207.494	0.888982	0.88107	0.00180848	2000.59	64.86	29.3
1900-01-18 19:30:01	327.623	65.5234	207.494	0.889208	0.881635	0.00185369	2000.49	64.86	29.3
1900-01-18 20:30:01	327.623	65.5234	207.494	0.889095	0.881635	0.00185369	2000.47	64.86	29.3
1900-01-18 21:30:01	327.623	65.5234	218.415	0.889434	0.882087	0.00185369	2000.45	65.23	29.3
1900-01-18 22:30:01	327.623	65.5234	207.494	0.889321	0.882087	0.00176327	2000.52	65.23	29.3
1900-01-18 23:30:01	316.702	65.5234	207.494	0.889321	0.882087	0.00180848	2000.47	65.24	29.3
1900-01-19 00:30:01	327.623	65.5234	207.494	0.889095	0.881635	0.00185369	2000.47	65.24	29.3
1900-01-19 01:30:01	327.623	65.5234	218.415	0.889434	0.881974	0.00185369	2000.47	65.31	29.3
1900-01-19 02:30:01	316.702	65.5234	207.494	0.889208	0.881635	0.00185369	2000.49	65.31	29.3
1900-01-19 03:30:01	327.623	65.5234	207.494	0.889321	0.881974	0.00185369	2000.45	65.32	29.3
1900-01-19 04:30:01	316.702	65.5234	207.494	0.889547	0.8822	0.00185369	2000.45	65.32	29.3
1900-01-19 05:30:01	327.623	65.5234	218.415	0.889321	0.881974	0.00180848	2000.49	65.32	29.3
1900-01-19 06:30:01	327.623	65.5234	207.494	0.88966	0.882313	0.00185369	2000.45	65.32	29.3
1900-01-19 07:30:01	316.702	65.5234	207.494	0.889547	0.8822	0.00180848	2000.49	65.32	29.3
1900-01-19 08:30:01	327.623	65.5234	207.494	0.889886	0.882539	0.00185369	2000.45	65.32	29.3
1900-01-19 09:30:01	327.623	65.5234	207.494	0.889999	0.882426	0.00180848	2000.53	65.32	29.3
1900-01-19 10:30:01	316.702	65.5234	218.415	0.88966	0.882426	0.00180848	2000.47	65.32	29.3
1900-01-19 11:30:01	327.623	54.6027	207.494	0.889886	0.882426	0.00180848	2000.51	65.32	29.3
1900-01-19 12:30:01	316.702	65.5234	207.494	0.889999	0.882652	0.00185369	2000.45	65.32	29.3
1900-01-19 13:30:01	327.623	65.5234	207.494	0.889886	0.882652	0.00185369	2000.43	65.32	29.3
1900-01-19 14:30:01	316.702	65.5234	218.415	0.889999	0.882652	0.00185369	2000.45	65.32	29.3
1900-01-19 15:30:01	327.623	65.5234	207.494	0.889886	0.882652	0.00180848	2000.47	65.32	29.3
1900-01-19 16:30:01	316.702	65.5234	207.494	0.890112	0.882539	0.00185369	2000.49	65.32	29.3
1900-01-19 17:30:01	327.623	65.5234	207.494	0.889999	0.882765	0.00185369	2000.43	65.63	29.3
1900-01-19 18:30:01	327.623	65.5234	207.494	0.889999	0.882765	0.00185369	2000.43	65.63	29.3
1900-01-19 19:30:01	316.702	65.5234	218.415	0.889999	0.882878	0.00180848	2000.45	65.66	29.3
1900-01-19 20:30:01	327.623	65.5234	207.494	0.890225	0.882765	0.00185369	2000.47	65.66	29.3
1900-01-19 21:30:01	316.702	65.5234	207.494	0.890112	0.882765	0.00180848	2000.49	65.72	29.3
1900-01-19 22:30:01	327.623	54.6027	207.494	0.889886	0.882765	0.00185369	2000.41	65.72	29.3
1900-01-19 23:30:01	316.702	65.5234	218.415	0.889886	0.882765	0.00185369	2000.41	65.76	29.3
1900-01-20 00:30:01	327.623	65.5234	207.494	0.890112	0.882991	0.00189891	2000.36	65.76	29.3
1900-01-20 01:30:01	316.702	65.5234	207.494	0.890112	0.882765	0.00189891	2000.4	65.76	29.3
1900-01-20 02:30:01	316.702	65.5234	207.494	0.890112	0.882878	0.00185369	2000.43	65.76	29.3
1900-01-20 03:30:01	327.623	65.5234	207.494	0.890112	0.882652	0.00171806	2000.6	65.76	29.3
1900-01-20 04:30:01	316.702	65.5234	207.494	0.890225	0.882878	0.00180848	2000.49	65.76	29.3
1900-01-20 05:30:01	327.623	65.5234	218.415	0.890451	0.883104	0.00180848	2000.49	65.76	29.3
1900-01-20 06:30:01	316.702	65.5234	207.494	0.890564	0.883104	0.00185369	2000.47	65.76	29.3
1900-01-20 07:30:01	327.623	54.6027	207.494	0.890225	0.882991	0.00189891	2000.38	65.76	29.3
1900-01-20 08:30:01	316.702	65.5234	207.494	0.890564	0.883443	0.00189891	2000.36	65.76	29.3
1900-01-20 09:30:01	327.623	65.5234	207.494	0.890112	0.882878	0.00180848	2000.47	65.76	29.3
1900-01-20 10:30:01	316.702	65.5234	218.415	0.890225	0.882991	0.00185369	2000.43	65.76	29.3
1900-01-20 11:30:01	327.623	65.5234	207.494	0.89079	0.88333	0.00185369	2000.47	65.76	29.3
1900-01-20 12:30:01	316.702	65.5234	207.494	0.890564	0.882991	0.00180848	2000.53	65.76	29.3
1900-01-20 13:30:01	327.623	54.6027	207.494	0.890225	0.883217	0.00185369	2000.39	66.29	29.3
1900-01-20 14:30:01	316.702	65.5234	207.494	0.890112	0.882991	0.00189891	2000.36	66.29	29.3
1900-01-20 15:30:01	316.702	65.5234	207.494	0.889886	0.882765	0.00180848	2000.45	66.35	29.3
1900-01-20 16:30:01	327.623	65.5234	218.415	0.890225	0.883104	0.00185369	2000.41	66.35	29.3
1900-01-20 17:30:01	316.702	54.6027	207.494	0.890338	0.882991	0.00180848	2000.49	66.35	29.3
1900-01-20 18:30:01	316.702	65.5234	207.494	0.890451	0.883104	0.00185369	2000.45	66.35	29.3
1900-01-20 19:30:01	327.623	65.5234	207.494	0.890564	0.883104	0.00180848	2000.51	66.37	29.3
1900-01-20 20:30:01	316.702	54.6027	207.494	0.890564	0.88333	0.00180848	2000.47	66.37	29.4
1900-01-20 21:30:01	316.702	65.5234	207.494	0.890677	0.88333	0.00185369	2000.45	66.37	29.3
1900-01-20 22:30:01	316.702	65.5234	218.415	0.89079	0.883556	0.00185369	2000.43	66.37	29.3
1900-01-20 23:30:01	327.623	54.6027	207.494	0.890338	0.88333	0.00180848	2000.43	66.37	29.3
1900-01-21 00:30:01	316.702	65.5234	207.494	0.890564	0.88333	0.00185369	2000.43	66.37	29.3
1900-01-21 01:30:01	316.702	65.5234	207.494	0.890338	0.88333	0.00185369	2000.39	66.37	29.3
1900-01-21 02:30:01	327.623	54.6027	207.494	0.890564	0.88333	0.00185369	2000.43	66.37	29.3
1900-01-21 03:30:01	316.702	65.5234	207.494	0.890564	0.88333	0.00180848	2000.47	66.37	29.3
1900-01-21 04:30:01	316.702	65.5234	218.415	0.890451	0.883217	0.00180848	2000.47	66.37	29.3
1900-01-21 05:30:01	327.623	54.6027	207.494	0.890338	0.88333	0.00185369	2000.39	66.37	29.3
1900-01-21 06:30:01	316.702	65.5234	207.494	0.890677	0.88333	0.00180848	2000.49	66.37	29.3
1900-01-21 07:30:01	316.702	65.5234	207.494	0.890677	0.883556	0.00185369	2000.41	66.37	29.3
1900-01-21 08:30:01	316.702	54.6027	207.494	0.890338	0.883217	0.00180848	2000.45	66.37	29.3
1900-01-21 09:30:01	327.623	65.5234	207.494	0.890564	0.883556	0.00180848	2000.43	66.86	29.3
1900-01-21 10:30:01	316.702	65.5234	218.415	0.890677	0.88333	0.00185369	2000.45	66.86	29.3
1900-01-21 11:30:01	316.702	54.6027	207.494	0.890564	0.88333	0.00185369	2000.43	66.92	29.3
1900-01-21 12:30:01	327.623	65.5234	207.494	0.890677	0.883782	0.00185369	2000.37	66.92	29.3
1900-01-21 13:30:01	316.702	65.5234	207.494	0.890564	0.883556	0.00180848	2000.43	66.93	29.4
1900-01-21 14:30:01	327.623	65.5234	207.494	0.890677	0.88333	0.00185369	2000.45	66.93	29.3
1900-01-21 15:30:01	316.702	54.6027	207.494	0.890564	0.883443	0.00185369	2000.41	67.01	29.3
1900-01-21 16:30:01	316.702	65.5234	207.494	0.890677	0.883556	0.00189891	2000.36	67.01	29.3
1900-01-21 17:30:01	316.702	65.5234	207.494	0.89079	0.883782	0.00185369	2000.39	67.01	29.3
1900-01-21 18:30:01	316.702	54.6027	218.415	0.890903	0.883782	0.00185369	2000.41	67.01	29.3
1900-01-21 19:30:01	327.623	65.5234	207.494	0.89079	0.883669	0.00185369	2000.41	67.01	29.3
1900-01-21 20:30:01	316.702	54.6027	207.494	0.891016	0.884008	0.00176327	2000.48	67.01	29.3
1900-01-21 21:30:01	316.702	65.5234	207.494	0.890903	0.883782	0.00189891	2000.36	67.01	29.3
1900-01-21 22:30:01	327.623	54.6027	207.494	0.891129	0.883895	0.00185369	2000.43	67.01	29.3
1900-01-21 23:30:01	316.702	54.6027	207.494	0.891129	0.884008	0.00189891	2000.37	67.01	29.3
1900-01-22 00:30:01	316.702	65.5234	207.494	0.891694	0.8848	0.00185369	2000.37	67.01	29.3
1900-01-22 01:30:01	316.702	54.6027	218.415	0.891582	0.884574	0.00180848	2000.44	67.01	29.3
1900-01-22 02:30:01	327.623	65.5234	207.494	0.891355	0.884122	0.00185369	2000.43	67.01	29.3
1900-01-22 03:30:01	316.702	54.6027	207.494	0.891355	0.884348	0.00185369	2000.39	67.01	29.3
1900-01-22 04:30:01	316.702	54.6027	207.494	0.891129	0.884008	0.00189891	2000.37	67.01	29.4
1900-01-22 05:30:01	316.702	65.5234	207.494	0.891468	0.884235	0.00185369	2000.43	67.37	29.3
1900-01-22 06:30:01	327.623	54.6027	207.494	0.891582	0.884461	0.00185369	2000.41	67.37	29.3
1900-01-22 07:30:01	316.702	65.5234	207.494	0.891016	0.883895	0.00189891	2000.36	67.37	29.3
1900-01-22 08:30:01	316.702	54.6027	218.415	0.891582	0.884574	0.00180848	2000.44	67.37	29.3
1900-01-22 09:30:01	316.702	54.6027	207.494	0.891468	0.884235	0.00185369	2000.43	67.12	29.3
1900-01-22 10:30:01	316.702	65.5234	207.494	0.891355	0.884235	0.00185369	2000.41	67.12	29.3
1900-01-22 11:30:01	316.702	54.6027	207.494	0.891242	0.884122	0.00176327	2000.5	67.23	29.3
1900-01-22 12:30:01	316.702	65.5234	207.494	0.891582	0.884008	0.00185369	2000.49	67.23	29.3
1900-01-22 13:30:01	327.623	54.6027	207.494	0.891694	0.884461	0.00185369	2000.43	67.23	29.3
1900-01-22 14:30:01	316.702	54.6027	218.415	0.891355	0.884122	0.00185369	2000.43	67.23	29.3
1900-01-22 15:30:01	316.702	65.5234	207.494	0.891355	0.884348	0.00185369	2000.39	67.23	29.3
1900-01-22 16:30:01	316.702	54.6027	207.494	0.891355	0.884348	0.00185369	2000.39	67.23	29.3
1900-01-22 17:30:01	316.702	65.5234	207.494	0.891242	0.884008	0.00185369	2000.43	67.23	29.3
1900-01-22 18:30:01	327.623	54.6027	207.494	0.891694	0.8848	0.00185369	2000.37	67.23	29.3
1900-01-22 19:30:01	316.702	54.6027	207.494	0.891582	0.884574	0.00185369	2000.39	67.23	29.3
1900-01-22 20:30:01	305.782	65.5234	218.415	0.891242	0.884122	0.00176327	2000.5	67.23	29.3
1900-01-22 21:30:01	327.623	54.6027	207.494	0.891129	0.884235	0.00189891	2000.33	67.23	29.3
1900-01-22 22:30:01	316.702	54.6027	207.494	0.891355	0.884348	0.00185369	2000.39	67.23	29.3
1900-01-22 23:30:01	316.702	65.5234	207.494	0.891468	0.884348	0.00185369	2000.41	67.23	29.3
1900-01-23 00:30:01	316.702	54.6027	207.494	0.891242	0.884348	0.00185369	2000.37	67.23	29.3
1900-01-23 01:30:01	327.623	54.6027	207.494	0.891582	0.884913	0.00185369	2000.33	67.23	29.3
1900-01-23 02:30:01	316.702	65.5234	207.494	0.891694	0.884461	0.00189891	2000.39	67.48	29.3
1900-01-23 03:30:01	316.702	54.6027	207.494	0.891355	0.884348	0.00185369	2000.39	67.48	29.3
1900-01-23 04:30:01	316.702	54.6027	218.415	0.891468	0.884461	0.00185369	2000.39	67.65	29.3
1900-01-23 05:30:01	316.702	54.6027	207.494	0.891808	0.884574	0.00185369	2000.43	67.65	29.3
1900-01-23 06:30:01	316.702	65.5234	207.494	0.891242	0.884348	0.00185369	2000.37	67.72	29.3
1900-01-23 07:30:01	327.623	54.6027	207.494	0.891468	0.884574	0.00189891	2000.33	67.72	29.3
1900-01-23 08:30:01	316.702	54.6027	207.494	0.891468	0.884461	0.00185369	2000.39	67.68	29.3
1900-01-23 09:30:01	316.702	65.5234	207.494	0.891355	0.884348	0.00185369	2000.39	67.68	29.3
1900-01-23 10:30:01	316.702	54.6027	207.494	0.891355	0.884574	0.00180848	2000.4	67.68	29.3
1900-01-23 11:30:01	316.702	54.6027	207.494	0.891582	0.884461	0.00185369	2000.41	67.68	29.3
1900-01-23 12:30:01	316.702	54.6027	207.494	0.891582	0.8848	0.00189891	2000.31	67.68	29.3
1900-01-23 13:30:01	316.702	54.6027	207.494	0.891808	0.884687	0.00185369	2000.41	67.68	29.3
1900-01-23 14:30:01	316.702	65.5234	218.415	0.891921	0.884913	0.00185369	2000.39	67.68	29.3
1900-01-23 15:30:01	316.702	54.6027	207.494	0.891582	0.884687	0.00185369	2000.37	67.68	29.3
1900-01-23 16:30:01	327.623	54.6027	207.494	0.891808	0.8848	0.00185369	2000.39	67.68	29.3
1900-01-23 17:30:01	316.702	65.5234	207.494	0.891808	0.885026	0.00185369	2000.35	67.68	29.4
1900-01-23 18:30:01	316.702	54.6027	207.494	0.891694	0.8848	0.00189891	2000.33	67.68	29.3
1900-01-23 19:30:01	316.702	54.6027	207.494	0.891468	0.884687	0.00189891	2000.31	67.68	29.3
1900-01-23 20:30:01	316.702	54.6027	207.494	0.891582	0.884574	0.00185369	2000.39	67.68	29.3
1900-01-23 21:30:01	316.702	54.6027	207.494	0.891468	0.884574	0.00185369	2000.37	67.68	29.3
1900-01-23 22:30:01	316.702	65.5234	207.494	0.891468	0.884461	0.00189891	2000.35	67.97	29.3
1900-01-23 23:30:01	316.702	54.6027	218.415	0.891468	0.884461	0.00180848	2000.44	67.97	29.4
1900-01-24 00:30:01	316.702	54.6027	207.494	0.891694	0.8848	0.00185369	2000.37	68.04	29.3
1900-01-24 01:30:01	316.702	54.6027	207.494	0.891921	0.8848	0.00189891	2000.37	68.04	29.3
1900-01-24 02:30:01	316.702	54.6027	207.494	0.891694	0.884913	0.00189891	2000.31	68.12	29.3
1900-01-24 03:30:01	316.702	54.6027	207.494	0.891355	0.884461	0.00185369	2000.37	68.12	29.4
1900-01-24 04:30:01	316.702	65.5234	207.494	0.891468	0.884235	0.00185369	2000.43	68.2	29.3
1900-01-24 05:30:01	316.702	54.6027	207.494	0.891582	0.884687	0.00189891	2000.33	68.2	29.3
1900-01-24 06:30:01	316.702	54.6027	207.494	0.891694	0.884687	0.00185369	2000.39	68.2	29.3
1900-01-24 07:30:01	316.702	54.6027	207.494	0.891694	0.884687	0.00189891	2000.35	68.2	29.3
1900-01-24 08:30:01	316.702	54.6027	207.494	0.891694	0.884687	0.00189891	2000.35	68.2	29.3
1900-01-24 09:30:01	316.702	54.6027	207.494	0.891582	0.884461	0.00180848	2000.46	68.2	29.3
1900-01-24 10:30:01	316.702	65.5234	207.494	0.891921	0.885139	0.00189891	2000.31	68.2	29.3
1900-01-24 11:30:01	316.702	54.6027	207.494	0.891582	0.8848	0.00185369	2000.35	68.2	29.3
1900-01-24 12:30:01	316.702	54.6027	218.415	0.891694	0.8848	0.00185369	2000.37	68.2	29.3
1900-01-24 13:30:01	316.702	54.6027	207.494	0.891694	0.884913	0.00189891	2000.31	68.2	29.3
1900-01-24 14:30:01	316.702	54.6027	207.494	0.891468	0.8848	0.00185369	2000.33	68.2	29.3
1900-01-24 15:30:01	316.702	54.6027	207.494	0.891242	0.884461	0.00189891	2000.31	68.2	29.3
1900-01-24 16:30:01	316.702	54.6027	207.494	0.891355	0.884461	0.00189891	2000.33	68.2	29.3
1900-01-24 17:30:01	316.702	54.6027	207.494	0.891582	0.884574	0.00180848	2000.44	68.2	29.3
1900-01-24 18:30:01	316.702	65.5234	207.494	0.891921	0.885026	0.00185369	2000.37	68.48	29.3
1900-01-24 19:30:01	316.702	54.6027	207.494	0.891694	0.884913	0.00189891	2000.31	68.48	29.3
1900-01-24 20:30:01	316.702	54.6027	207.494	0.892147	0.885252	0.00185369	2000.37	68.64	29.4
1900-01-24 21:30:01	316.702	54.6027	207.494	0.891694	0.884913	0.00189891	2000.31	68.64	29.4
1900-01-24 22:30:01	316.702	54.6027	207.494	0.891694	0.884687	0.00189891	2000.35	68.68	29.4
1900-01-24 23:30:01	316.702	54.6027	207.494	0.891582	0.884687	0.00185369	2000.37	68.68	29.3
1900-01-25 00:30:01	305.782	54.6027	207.494	0.891808	0.884574	0.00185369	2000.43	68.68	29.3
1900-01-25 01:30:01	316.702	54.6027	207.494	0.891808	0.884913	0.00180848	2000.42	68.68	29.3
1900-01-25 02:30:01	316.702	54.6027	207.494	0.891921	0.884913	0.00185369	2000.39	68.68	29.3
1900-01-25 03:30:01	316.702	54.6027	207.494	0.891921	0.885139	0.00185369	2000.35	68.68	29.3
1900-01-25 04:30:01	316.702	54.6027	207.494	0.892034	0.885139	0.00189891	2000.33	68.68	29.3
1900-01-25 05:30:01	316.702	54.6027	207.494	0.891582	0.884687	0.00185369	2000.37	68.68	29.3
1900-01-25 06:30:01	316.702	54.6027	207.494	0.891694	0.884687	0.00189891	2000.35	68.68	29.3
1900-01-25 07:30:01	316.702	54.6027	207.494	0.891921	0.885026	0.00185369	2000.37	68.68	29.3
1900-01-25 08:30:01	316.702	54.6027	207.494	0.891921	0.885026	0.00189891	2000.33	68.68	29.3
1900-01-25 09:30:01	316.702	54.6027	207.494	0.892147	0.885478	0.00194412	2000.24	68.68	29.3
1900-01-25 10:30:01	305.782	54.6027	207.494	0.891921	0.885252	0.00189891	2000.29	68.68	29.4
1900-01-25 11:30:01	316.702	54.6027	207.494	0.892034	0.885139	0.00185369	2000.37	68.68	29.3
1900-01-25 12:30:01	316.702	54.6027	207.494	0.89226	0.885365	0.00189891	2000.33	68.68	29.3
1900-01-25 13:30:01	316.702	54.6027	207.494	0.892034	0.885365	0.00189891	2000.29	68.68	29.3
1900-01-25 14:30:01	316.702	54.6027	218.415	0.892147	0.885139	0.00185369	2000.39	68.85	29.4
1900-01-25 15:30:01	316.702	54.6027	207.494	0.891808	0.885139	0.00185369	2000.33	68.85	29.3
1900-01-25 16:30:01	316.702	54.6027	207.494	0.891808	0.885139	0.00185369	2000.33	69.08	29.4
1900-01-25 17:30:01	305.782	54.6027	207.494	0.891921	0.885365	0.00189891	2000.27	69.08	29.4
1900-01-25 18:30:01	316.702	54.6027	207.494	0.891808	0.885478	0.00185369	2000.27	69.23	29.3
1900-01-25 19:30:01	316.702	54.6027	207.494	0.891921	0.885252	0.00185369	2000.33	69.23	29.3
1900-01-25 20:30:01	316.702	54.6027	207.494	0.89226	0.885591	0.00185369	2000.33	69.19	29.3
1900-01-25 21:30:01	316.702	54.6027	207.494	0.892147	0.885591	0.00189891	2000.27	69.19	29.3
1900-01-25 22:30:01	316.702	54.6027	207.494	0.892034	0.885252	0.00189891	2000.31	69.19	29.3
1900-01-25 23:30:01	305.782	54.6027	207.494	0.891921	0.885478	0.00185369	2000.29	69.19	29.3
1900-01-26 00:30:01	316.702	54.6027	207.494	0.891921	0.885252	0.00194412	2000.24	69.19	29.3
1900-01-26 01:30:01	316.702	54.6027	207.494	0.891921	0.885252	0.00185369	2000.33	69.19	29.3
1900-01-26 02:30:01	316.702	54.6027	207.494	0.892034	0.885365	0.00185369	2000.33	69.19	29.3
1900-01-26 03:30:01	316.702	54.6027	207.494	0.892034	0.885026	0.00185369	2000.39	69.19	29.3
1900-01-26 04:30:01	305.782	54.6027	207.494	0.891921	0.885139	0.00180848	2000.4	69.19	29.3
1900-01-26 05:30:01	316.702	43.682	207.494	0.892034	0.885252	0.00185369	2000.35	69.19	29.3
1900-01-26 06:30:01	316.702	54.6027	207.494	0.891694	0.885026	0.00185369	2000.33	69.19	29.3
1900-01-26 07:30:01	316.702	54.6027	207.494	0.892147	0.885026	0.00185369	2000.41	69.19	29.3
1900-01-26 08:30:01	305.782	54.6027	207.494	0.891921	0.885139	0.00189891	2000.31	69.19	29.3
1900-01-26 09:30:01	316.702	54.6027	207.494	0.891921	0.885139	0.00185369	2000.35	69.19	29.4
1900-01-26 10:30:01	316.702	54.6027	207.494	0.892034	0.885026	0.00189891	2000.35	69.26	29.4
1900-01-26 11:30:01	305.782	54.6027	207.494	0.891921	0.885139	0.00185369	2000.35	69.26	29.4
1900-01-26 12:30:01	316.702	43.682	207.494	0.891808	0.885139	0.00180848	2000.38	69.3	29.4
1900-01-26 13:30:01	316.702	54.6027	207.494	0.891694	0.885026	0.00185369	2000.33	69.3	29.4
1900-01-26 14:30:01	316.702	54.6027	207.494	0.891808	0.885139	0.00189891	2000.29	69.4	29.4
1900-01-26 15:30:01	305.782	54.6027	207.494	0.892034	0.885365	0.00180848	2000.38	69.4	29.4
1900-01-26 16:30:01	316.702	54.6027	207.494	0.891808	0.885139	0.00185369	2000.33	69.46	29.3
1900-01-26 17:30:01	305.782	54.6027	207.494	0.891921	0.885139	0.00189891	2000.31	69.46	29.4
1900-01-26 18:30:01	316.702	54.6027	207.494	0.892034	0.885252	0.00185369	2000.35	69.46	29.3
1900-01-26 19:30:01	316.702	43.682	207.494	0.891694	0.885252	0.00189891	2000.25	69.46	29.3
1900-01-26 20:30:01	305.782	54.6027	207.494	0.891808	0.885365	0.00189891	2000.25	69.46	29.3
1900-01-26 21:30:01	316.702	54.6027	207.494	0.892147	0.885252	0.00185369	2000.37	69.46	29.3
1900-01-26 22:30:01	316.702	54.6027	207.494	0.892034	0.885365	0.00185369	2000.33	69.46	29.3
1900-01-26 23:30:01	305.782	54.6027	207.494	0.892147	0.885478	0.00189891	2000.29	69.46	29.3
1900-01-27 00:30:01	316.702	43.682	207.494	0.89226	0.885591	0.00189891	2000.29	69.46	29.3
1900-01-27 01:30:01	316.702	54.6027	207.494	0.892147	0.885365	0.00185369	2000.35	69.46	29.3
1900-01-27 02:30:01	305.782	54.6027	207.494	0.892599	0.885817	0.00185369	2000.35	69.46	29.4
1900-01-27 03:30:01	316.702	54.6027	207.494	0.892486	0.885704	0.00189891	2000.31	69.46	29.3
1900-01-27 04:30:01	316.702	43.682	207.494	0.892599	0.88593	0.00180848	2000.38	69.46	29.3
1900-01-27 05:30:01	305.782	54.6027	196.573	0.892599	0.88593	0.00185369	2000.33	69.46	29.3
1900-01-27 06:30:01	316.702	54.6027	207.494	0.892486	0.885817	0.00185369	2000.33	69.65	29.4
1900-01-27 07:30:01	316.702	54.6027	207.494	0.892825	0.88593	0.00185369	2000.37	69.65	29.4
1900-01-27 08:30:01	305.782	43.682	207.494	0.892599	0.886043	0.00180848	2000.36	69.71	29.4
1900-01-27 09:30:01	316.702	54.6027	207.494	0.892825	0.886156	0.00180848	2000.38	69.71	29.4
1900-01-27 10:30:01	316.702	54.6027	207.494	0.892825	0.886043	0.00189891	2000.31	69.79	29.4
1900-01-27 11:30:01	305.782	54.6027	207.494	0.892712	0.886156	0.00185369	2000.31	69.79	29.4
1900-01-27 12:30:01	316.702	43.682	207.494	0.893164	0.886382	0.00185369	2000.35	69.9	29.3
1900-01-27 13:30:01	316.702	54.6027	207.494	0.893164	0.886608	0.00189891	2000.27	69.9	29.4
1900-01-27 14:30:01	305.782	54.6027	207.494	0.893051	0.886382	0.00185369	2000.33	69.9	29.3
1900-01-27 15:30:01	316.702	43.682	207.494	0.893051	0.886608	0.00189891	2000.25	69.9	29.3
1900-01-27 16:30:01	316.702	54.6027	207.494	0.893051	0.886382	0.00185369	2000.33	69.9	29.3
1900-01-27 17:30:01	316.702	54.6027	207.494	0.892825	0.886382	0.00185369	2000.29	69.9	29.3
1900-01-27 18:30:01	305.782	43.682	207.494	0.89339	0.886834	0.00185369	2000.31	69.9	29.3
1900-01-27 19:30:01	316.702	54.6027	207.494	0.893164	0.886495	0.00185369	2000.33	69.9	29.3
1900-01-27 20:30:01	316.702	54.6027	207.494	0.893164	0.886608	0.00185369	2000.31	69.9	29.3
1900-01-27 21:30:01	305.782	43.682	207.494	0.893164	0.886608	0.00189891	2000.27	69.9	29.3
1900-01-27 22:30:01	316.702	54.6027	207.494	0.893503	0.886495	0.00185369	2000.39	69.9	29.3
1900-01-27 23:30:01	316.702	43.682	207.494	0.893164	0.886608	0.00185369	2000.31	69.9	29.3
1900-01-28 00:30:01	305.782	54.6027	207.494	0.893164	0.886608	0.00185369	2000.31	69.9	29.3
1900-01-28 01:30:01	316.702	54.6027	207.494	0.893616	0.886834	0.00185369	2000.35	69.9	29.4
1900-01-28 02:30:01	316.702	43.682	207.494	0.89339	0.886608	0.00180848	2000.4	69.9	29.4
1900-01-28 03:30:01	305.782	54.6027	207.494	0.893616	0.886721	0.00185369	2000.37	70.1	29.4
1900-01-28 04:30:01	316.702	43.682	207.494	0.893616	0.886834	0.00185369	2000.35	70.1	29.4
1900-01-28 05:30:01	305.782	54.6027	207.494	0.893616	0.886947	0.00189891	2000.29	70.19	29.4
1900-01-28 06:30:01	316.702	54.6027	207.494	0.893503	0.886834	0.00185369	2000.33	70.12	29.4
1900-01-28 07:30:01	305.782	43.682	207.494	0.89339	0.886608	0.00185369	2000.35	70.12	29.4
1900-01-28 08:30:01	316.702	54.6027	207.494	0.893503	0.886834	0.00185369	2000.33	70.15	29.3
1900-01-28 09:30:01	316.702	43.682	207.494	0.893277	0.886721	0.00185369	2000.31	70.15	29.4
1900-01-28 10:30:01	305.782	54.6027	207.494	0.893164	0.886608	0.00185369	2000.31	70.15	29.3
1900-01-28 11:30:01	305.782	54.6027	207.494	0.893277	0.886721	0.00189891	2000.27	70.15	29.3
1900-01-28 12:30:01	316.702	43.682	207.494	0.893503	0.886721	0.00185369	2000.35	70.15	29.3
1900-01-28 13:30:01	305.782	54.6027	207.494	0.893164	0.886608	0.00189891	2000.27	70.15	29.3
1900-01-28 14:30:01	316.702	43.682	207.494	0.893164	0.886495	0.00185369	2000.33	70.15	29.3
1900-01-28 15:30:01	305.782	54.6027	207.494	0.893503	0.886834	0.00185369	2000.33	70.15	29.3
1900-01-28 16:30:01	316.702	43.682	207.494	0.89339	0.886608	0.00185369	2000.35	70.15	29.3
1900-01-28 17:30:01	305.782	54.6027	207.494	0.893503	0.886834	0.00185369	2000.33	70.15	29.3
1900-01-28 18:30:01	316.702	43.682	207.494	0.893277	0.886721	0.00185369	2000.31	70.15	29.3
1900-01-28 19:30:01	305.782	54.6027	207.494	0.893729	0.886834	0.00189891	2000.33	70.15	29.4
1900-01-28 20:30:01	316.702	54.6027	196.573	0.893164	0.886721	0.00185369	2000.29	70.15	29.3
1900-01-28 21:30:01	305.782	43.682	207.494	0.893277	0.886834	0.00185369	2000.29	70.15	29.3
1900-01-28 22:30:01	305.782	54.6027	207.494	0.893729	0.886947	0.00189891	2000.31	70.15	29.4
1900-01-28 23:30:01	316.702	43.682	207.494	0.893842	0.88706	0.00189891	2000.31	70.6	29.4
1900-01-29 00:30:01	305.782	54.6027	207.494	0.893503	0.886834	0.00189891	2000.29	70.6	29.4
1900-01-29 01:30:01	316.702	43.682	207.494	0.893503	0.886721	0.00185369	2000.35	70.63	29.4
1900-01-29 02:30:01	305.782	54.6027	207.494	0.893729	0.886947	0.00189891	2000.31	70.63	29.4
1900-01-29 03:30:01	305.782	43.682	207.494	0.893729	0.887286	0.00189891	2000.25	70.66	29.4
1900-01-29 04:30:01	316.702	43.682	207.494	0.893503	0.886947	0.00180848	2000.36	70.66	29.3
1900-01-29 05:30:01	305.782	54.6027	207.494	0.893955	0.88706	0.00185369	2000.37	70.69	29.3
1900-01-29 06:30:01	305.782	43.682	207.494	0.894068	0.887399	0.00185369	2000.33	70.69	29.3
1900-01-29 07:30:01	316.702	54.6027	207.494	0.893729	0.88706	0.00185369	2000.33	70.69	29.3
1900-01-29 08:30:01	305.782	43.682	207.494	0.893729	0.886947	0.00185369	2000.35	70.69	29.3
1900-01-29 09:30:01	316.702	54.6027	207.494	0.893729	0.887173	0.00185369	2000.31	70.69	29.3
1900-01-29 10:30:01	305.782	43.682	207.494	0.893955	0.887173	0.00185369	2000.35	70.69	29.3
1900-01-29 11:30:01	316.702	43.682	207.494	0.893955	0.887286	0.00185369	2000.33	70.69	29.3
1900-01-29 12:30:01	305.782	54.6027	207.494	0.894407	0.887625	0.00185369	2000.35	70.69	29.3
1900-01-29 13:30:01	305.782	43.682	207.494	0.894407	0.887625	0.00185369	2000.35	70.69	29.3
1900-01-29 14:30:01	316.702	54.6027	207.494	0.894181	0.887399	0.00189891	2000.31	70.69	29.3
1900-01-29 15:30:01	305.782	43.682	196.573	0.894068	0.887399	0.00185369	2000.33	70.69	29.4
1900-01-29 16:30:01	316.702	43.682	207.494	0.894181	0.887286	0.00189891	2000.33	70.69	29.3
1900-01-29 17:30:01	305.782	54.6027	207.494	0.893729	0.88706	0.00194412	2000.24	70.69	29.3
1900-01-29 18:30:01	305.782	43.682	207.494	0.894181	0.887738	0.00189891	2000.25	70.69	29.3
1900-01-29 19:30:01	316.702	54.6027	207.494	0.893955	0.887399	0.00185369	2000.31	70.88	29.4
1900-01-29 20:30:01	305.782	43.682	207.494	0.894181	0.887738	0.00185369	2000.29	70.88	29.4
1900-01-29 21:30:01	316.702	43.682	207.494	0.894181	0.887965	0.00189891	2000.21	71.02	29.4
1900-01-29 22:30:01	305.782	54.6027	207.494	0.894181	0.887625	0.00185369	2000.31	71.02	29.4
1900-01-29 23:30:01	305.782	43.682	207.494	0.894068	0.887399	0.00189891	2000.29	71.19	29.4
1900-01-30 00:30:01	316.702	43.682	207.494	0.894068	0.887625	0.00189891	2000.25	71.19	29.4
1900-01-30 01:30:01	305.782	54.6027	207.494	0.894181	0.887738	0.00189891	2000.25	71.3	29.3
1900-01-30 02:30:01	305.782	43.682	207.494	0.89452	0.887965	0.00185369	2000.31	71.3	29.4
1900-01-30 03:30:01	316.702	43.682	207.494	0.894407	0.887852	0.00185369	2000.31	71.3	29.3
1900-01-30 04:30:01	305.782	54.6027	196.573	0.894294	0.887965	0.00189891	2000.23	71.3	29.3
1900-01-30 05:30:01	305.782	43.682	207.494	0.894181	0.887852	0.00185369	2000.27	71.3	29.3
1900-01-30 06:30:01	316.702	54.6027	207.494	0.894407	0.887852	0.00185369	2000.31	71.3	29.3
1900-01-30 07:30:01	305.782	43.682	207.494	0.894407	0.887965	0.00180848	2000.34	71.3	29.3
1900-01-30 08:30:01	305.782	43.682	207.494	0.894407	0.888078	0.00185369	2000.27	71.3	29.3
1900-01-30 09:30:01	316.702	54.6027	207.494	0.894294	0.887738	0.00189891	2000.27	71.3	29.3
1900-01-30 10:30:01	305.782	43.682	207.494	0.894407	0.888078	0.00185369	2000.27	71.3	29.3
1900-01-30 11:30:01	305.782	54.6027	207.494	0.89452	0.887965	0.00189891	2000.27	71.3	29.4
1900-01-30 12:30:01	305.782	43.682	207.494	0.894407	0.887965	0.00185369	2000.29	71.3	29.3
1900-01-30 13:30:01	305.782	43.682	207.494	0.894181	0.887852	0.00189891	2000.23	71.3	29.3
1900-01-30 14:30:01	316.702	43.682	207.494	0.894068	0.887286	0.00185369	2000.35	71.3	29.3
1900-01-30 15:30:01	305.782	54.6027	207.494	0.894407	0.887965	0.00185369	2000.29	71.34	29.4
1900-01-30 16:30:01	305.782	43.682	207.494	0.894294	0.887512	0.00189891	2000.31	71.34	29.4
1900-01-30 17:30:01	305.782	43.682	207.494	0.894068	0.887512	0.00189891	2000.27	71.36	29.4
1900-01-30 18:30:01	305.782	54.6027	196.573	0.893955	0.887399	0.00189891	2000.27	71.36	29.4
1900-01-30 19:30:01	316.702	43.682	207.494	0.894181	0.887852	0.00185369	2000.27	71.48	29.4
1900-01-30 20:30:01	305.782	43.682	207.494	0.894181	0.887738	0.00185369	2000.29	71.48	29.4
1900-01-30 21:30:01	305.782	54.6027	207.494	0.894181	0.887625	0.00185369	2000.31	71.38	29.3
1900-01-30 22:30:01	316.702	43.682	207.494	0.894068	0.887399	0.00189891	2000.29	71.38	29.4
1900-01-30 23:30:01	305.782	43.682	207.494	0.894068	0.887738	0.00189891	2000.23	71.38	29.3
1900-01-31 00:30:01	305.782	54.6027	207.494	0.894068	0.887399	0.00185369	2000.33	71.38	29.3
1900-01-31 01:30:01	305.782	43.682	207.494	0.893842	0.887399	0.00185369	2000.29	71.38	29.3
1900-01-31 02:30:01	316.702	43.682	207.494	0.894181	0.887399	0.00185369	2000.35	71.38	29.3
1900-01-31 03:30:01	305.782	54.6027	196.573	0.894181	0.887625	0.00185369	2000.31	71.38	29.3
1900-01-31 04:30:01	305.782	43.682	207.494	0.894181	0.887286	0.00185369	2000.37	71.38	29.3
1900-01-31 05:30:01	305.782	43.682	207.494	0.893842	0.887286	0.00180848	2000.36	71.38	29.3
1900-01-31 06:30:01	305.782	54.6027	207.494	0.893842	0.887512	0.00189891	2000.23	71.38	29.3
1900-01-31 07:30:01	305.782	43.682	207.494	0.893842	0.887399	0.00185369	2000.29	71.38	29.4
1900-01-31 08:30:01	316.702	43.682	207.494	0.893955	0.887399	0.00185369	2000.31	71.38	29.4
1900-01-31 09:30:01	305.782	54.6027	207.494	0.893955	0.887738	0.00185369	2000.25	71.38	29.3
1900-01-31 10:30:01	305.782	43.682	207.494	0.894181	0.887738	0.00185369	2000.29	71.38	29.4
1900-01-31 11:30:01	305.782	43.682	207.494	0.894068	0.887399	0.00180848	2000.38	71.78	29.4
1900-01-31 12:30:01	305.782	54.6027	196.573	0.894068	0.887399	0.00189891	2000.29	71.78	29.4
1900-01-31 13:30:01	305.782	43.682	207.494	0.894181	0.887512	0.00189891	2000.29	71.76	29.4
1900-01-31 14:30:01	305.782	43.682	207.494	0.894181	0.887512	0.00185369	2000.33	71.76	29.4
1900-01-31 15:30:01	305.782	54.6027	207.494	0.894407	0.887852	0.00189891	2000.27	71.77	29.4
1900-01-31 16:30:01	316.702	43.682	207.494	0.894407	0.887965	0.00189891	2000.25	71.77	29.4
1900-01-31 17:30:01	305.782	43.682	207.494	0.894181	0.887738	0.00189891	2000.25	71.9	29.4
1900-01-31 18:30:01	305.782	43.682	207.494	0.894407	0.887738	0.00185369	2000.33	71.9	29.4
1900-01-31 19:30:01	305.782	43.682	196.573	0.894407	0.887965	0.00185369	2000.29	71.9	29.4
1900-01-31 20:30:01	305.782	54.6027	207.494	0.894407	0.887965	0.00189891	2000.25	71.9	29.4
1900-01-31 21:30:01	305.782	43.682	207.494	0.894407	0.887852	0.00185369	2000.31	71.9	29.3
1900-01-31 22:30:01	305.782	43.682	207.494	0.894407	0.887965	0.00189891	2000.25	71.9	29.4
1900-01-31 23:30:01	305.782	43.682	207.494	0.894746	0.888191	0.00180848	2000.36	71.9	29.3
1900-02-01 00:30:01	305.782	43.682	207.494	0.894746	0.888191	0.00185369	2000.32	71.9	29.4
1900-02-01 01:30:01	305.782	54.6027	207.494	0.894859	0.888417	0.00189891	2000.25	71.9	29.4
1900-02-01 02:30:01	316.702	43.682	196.573	0.894746	0.888304	0.00180848	2000.34	71.9	29.4
1900-02-01 03:30:01	305.782	43.682	207.494	0.894972	0.888643	0.00185369	2000.28	71.9	29.4
1900-02-01 04:30:01	305.782	43.682	207.494	0.894859	0.888304	0.00185369	2000.32	71.9	29.4
1900-02-01 05:30:01	305.782	43.682	207.494	0.894972	0.888643	0.00185369	2000.28	71.9	29.4
1900-02-01 06:30:01	305.782	43.682	207.494	0.894972	0.888643	0.00185369	2000.28	71.9	29.4
1900-02-01 07:30:01	305.782	54.6027	207.494	0.895199	0.888643	0.00189891	2000.27	71.9	29.4
1900-02-01 08:30:01	305.782	43.682	207.494	0.895199	0.888869	0.00189891	2000.23	72.2	29.4
1900-02-01 09:30:01	305.782	54.6027	207.494	0.894407	0.888191	0.00189891	2000.21	71.9	29.4
1900-02-01 10:30:01	305.782	43.682	207.494	0.894407	0.888417	0.00185369	2000.21	71.9	29.3
1900-02-01 11:30:01	305.782	43.682	207.494	0.894407	0.888304	0.00189891	2000.19	71.9	29.4
1900-02-01 12:30:01	305.782	43.682	207.494	0.894746	0.888643	0.00180848	2000.28	71.9	29.3
1900-02-01 13:30:01	305.782	43.682	207.494	0.894746	0.888304	0.00185369	2000.3	71.9	29.4
1900-02-01 14:30:01	305.782	54.6027	207.494	0.894859	0.888643	0.00189891	2000.21	71.9	29.4
1900-02-01 15:30:01	316.702	43.682	196.573	0.894746	0.888643	0.00180848	2000.28	71.9	29.4
1900-02-01 16:30:01	305.782	43.682	207.494	0.894972	0.888643	0.00185369	2000.28	71.9	29.4
1900-02-01 17:30:01	305.782	43.682	207.494	0.894859	0.888869	0.00185369	2000.21	71.9	29.4
1900-02-01 18:30:01	305.782	43.682	207.494	0.894972	0.888304	0.00185369	2000.34	71.9	29.4
1900-02-01 19:30:01	305.782	43.682	207.494	0.894972	0.888643	0.00185369	2000.28	71.9	29.4
1900-02-01 20:30:01	305.782	54.6027	207.494	0.895199	0.888643	0.00189891	2000.27	71.9	29.4
1900-02-01 21:30:01	305.782	43.682	207.494	0.895199	0.888643	0.00189891	2000.27	72.2	29.4
1900-02-01 22:30:01	305.782	43.682	207.494	0.894972	0.888869	0.00185369	2000.24	71.9	29.4
1900-02-01 23:30:01	305.782	54.6027	207.494	0.895199	0.888191	0.00189891	2000.35	71.9	29.4
1900-02-02 00:30:01	305.782	43.682	207.494	0.895199	0.888417	0.00189891	2000.31	72.2	29.4
1900-02-02 01:30:01	305.782	54.6027	207.494	0.894407	0.888304	0.00189891	2000.19	71.9	29.4
1900-02-02 02:30:01	305.782	43.682	207.494	0.894407	0.888643	0.00185369	2000.17	71.9	29.3
1900-02-02 03:30:01	305.782	43.682	207.494	0.894407	0.888304	0.00189891	2000.19	71.9	29.4
1900-02-02 04:30:01	305.782	43.682	207.494	0.894746	0.888643	0.00180848	2000.28	71.9	29.3
1900-02-02 05:30:01	305.782	43.682	207.494	0.894746	0.888643	0.00185369	2000.23	71.9	29.4
1900-02-02 06:30:01	305.782	54.6027	207.494	0.894859	0.888643	0.00189891	2000.21	71.9	29.4
1900-02-02 07:30:01	316.702	43.682	196.573	0.894746	0.888869	0.00180848	2000.24	71.9	29.4
1900-02-02 08:30:01	305.782	43.682	207.494	0.894972	0.888304	0.00185369	2000.34	71.9	29.4
1900-02-02 09:30:01	305.782	43.682	207.494	0.894859	0.888643	0.00185369	2000.26	71.9	29.4
1900-02-02 10:30:01	305.782	43.682	207.494	0.894972	0.888643	0.00185369	2000.28	71.9	29.4
1900-02-02 11:30:01	305.782	43.682	207.494	0.894972	0.888643	0.00185369	2000.28	71.9	29.4
1900-02-02 12:30:01	305.782	54.6027	207.494	0.895199	0.888869	0.00189891	2000.23	71.9	29.4
1900-02-02 13:30:01	305.782	43.682	207.494	0.895199	0.888191	0.00189891	2000.35	72.2	29.4
1900-02-02 14:30:01	305.782	54.6027	207.494	0.895199	0.888417	0.00189891	2000.31	71.9	29.4
1900-02-02 15:30:01	305.782	43.682	207.494	0.895199	0.888304	0.00189891	2000.33	72.2	29.4
