# Supplementary material for: Physics-informed neural network-based prediction of permeation performance in reverse osmosis membrane elements
Source: Royal Society of Chemistry journal article supplement (doi:10.1039/d5ew00634a), 2025-01-01
Supplement: d5ew00634a2.xlsx [file d5ew00634a2.xlsx]

## Sheet: Subset of 10000 experimental da
Time	Primary Feed Flow Rate（L/h）	Primary Brine Flow Rate（L/h）	Primary Permeate Flow Rate（L/h）	Secondary Feed Flow Rate（L/h）	Secondary Brine Flow Rate（L/h）	Secondary Permeate Flow Rate（L/h）	EDI Feed Flow Rate（L/h）	EDI Brine Flow Rate（L/h）	EDI Permeate Flow Rate（L/h）	Primary Feed Pressure（Mpa）	Primary Brine Pressure（Mpa）	Primary Permeate Pressure（Mpa）	Secondary Feed Pressure（Mpa）	Secondary Brine Pressure（Mpa）	EDI Feed Pressure（Mpa）	EDI Permeate Pressure（Mpa）	Raw water tank level (M)	Primary water tank level (M)	Secondary water tank level (M)	Pure water tank level (M)	Primary High pressure pump switch	Secondary High pressure pump switch	EDI High pressure pump switch	EDI Switch	Primary Feed Concentration（mg/L）	Primary Brine Concentration（mg/L）	Primary Permeate Concentration（mg/L）	Secondary Feed Concentration（mg/L）	Secondary Brine Concentration（mg/L）	Secondary Permeate Concentration（mg/L）	EDI Feed Concentration（mg/L）	EDI Brine Concentration（mg/L）	EDI Permeate Resistance（MΩ/cm）	Primary water tank Concentration（mg/L）	Secondary water tank Concentration（mg/L）	Temperature （℃）
14:33:36	1179.46	1092.1	87.3648	578.806	502.359	87.3648	393.149	120.301	251.177	0.296252	0.232842	0.000497333	0.282236	0.249005	0.00678181	0.250656	0.600428	0.276291	0.34646	0.089339	TRUE	TRUE	TRUE	TRUE	653.43	599.09	4.71	6.13	6.42	2.87	1.09	27.99	18.25	5.84	1.76	22
14:33:37	1168.54	1103.02	87.3648	589.727	502.359	87.3648	393.149	131.222	262.098	0.296365	0.232842	0.00045212	0.282123	0.248892	0.00687223	0.250791	0.59975	0.275703	0.346686	0.0925038	TRUE	TRUE	TRUE	TRUE	653.43	599.09	4.71	6.12	6.42	2.87	1.09	27.99	18.25	5.84	1.76	22
14:33:38	1179.46	1092.1	87.3648	589.727	502.359	87.3648	393.149	120.301	251.177	0.296252	0.232842	0.000316484	0.282236	0.249005	0.00682702	0.250927	0.600563	0.275613	0.346008	0.0941315	TRUE	TRUE	TRUE	TRUE	653.43	602.44	4.71	6.12	6.42	2.87	1.09	28.85	18.25	5.84	1.76	22
14:33:39	1179.46	1103.02	87.3648	589.727	502.359	87.3648	393.149	131.222	262.098	0.296365	0.233068	0.00022606	0.282349	0.249005	0.00773126	0.251876	0.600292	0.275296	0.345917	0.0953974	TRUE	TRUE	TRUE	TRUE	653.43	602.44	4.71	6.12	6.42	2.87	1.09	28.85	18.25	5.88	1.76	22
14:33:40	1168.54	1092.1	76.4441	578.806	502.359	76.4441	393.149	120.301	251.177	0.296365	0.232729	0.000497333	0.282462	0.248892	0.00718872	0.250882	0.600156	0.274618	0.345601	0.0955783	TRUE	TRUE	TRUE	TRUE	653.43	602.44	4.71	6.12	6.42	2.87	1.09	29.63	18.25	5.88	1.76	22
14:33:41	1179.46	1103.02	87.3648	589.727	502.359	87.3648	393.149	131.222	262.098	0.297269	0.233633	0.00045212	0.282349	0.249005	0.00745999	0.251786	0.599433	0.274573	0.345601	0.0954878	TRUE	TRUE	TRUE	TRUE	653.43	602.44	4.71	6.12	6.42	2.87	1.09	29.63	18.25	5.88	1.76	21.9
14:33:42	1179.46	1103.02	87.3648	589.727	502.359	87.3648	393.149	120.301	251.177	0.297608	0.233859	0.000632969	0.282349	0.249005	0.00691744	0.251786	0.599704	0.273714	0.345827	0.0969346	TRUE	TRUE	TRUE	TRUE	628.57	602.44	4.71	6.12	6.42	2.86	1.09	30.31	18.25	5.85	1.76	21.9
14:33:43	1179.46	1103.02	87.3648	578.806	502.359	76.4441	393.149	131.222	262.098	0.296817	0.233181	0.000497333	0.282236	0.249005	0.00696265	0.250972	0.599207	0.273804	0.344968	0.0946288	TRUE	TRUE	TRUE	TRUE	628.57	602.44	4.92	6.12	6.42	2.86	1.09	30.31	18.25	5.85	1.76	21.9
14:33:44	1179.46	1103.02	87.3648	589.727	502.359	87.3648	393.149	120.301	251.177	0.296591	0.233068	0.00045212	0.282123	0.248779	0.00723393	0.251334	0.599026	0.273488	0.344516	0.0963921	TRUE	TRUE	TRUE	TRUE	641.61	602.44	4.92	6.12	6.42	2.86	1.09	30.31	18.25	5.82	1.76	21.9
14:33:45	1179.46	1092.1	87.3648	589.727	502.359	87.3648	404.07	131.222	262.098	0.296478	0.232842	0.000587757	0.28201	0.248553	0.00755041	0.251153	0.598936	0.272629	0.344787	0.0963017	TRUE	TRUE	TRUE	TRUE	641.61	602.44	4.95	6.12	6.42	2.86	1.09	30.31	18.25	5.82	1.76	21.9
14:33:46	1179.46	1103.02	87.3648	589.727	502.359	87.3648	393.149	120.301	251.177	0.296026	0.232729	0.000542545	0.28201	0.248553	0.00687223	0.251198	0.598664	0.272493	0.344245	0.0972511	TRUE	TRUE	TRUE	TRUE	627.63	602.44	4.95	6.12	6.42	2.86	1.1	30.31	18.25	5.86	1.76	21.9
14:33:47	1168.54	1103.02	87.3648	578.806	502.359	76.4441	393.149	131.222	262.098	0.296365	0.232955	0.00045212	0.282123	0.248666	0.00768605	0.250927	0.598393	0.272222	0.343838	0.0972511	TRUE	TRUE	TRUE	TRUE	627.63	602.44	4.98	6.12	6.42	2.86	1.1	30.31	18.25	5.86	1.76	21.9
14:33:48	1179.46	1092.1	76.4441	589.727	502.359	87.3648	393.149	131.222	251.177	0.296252	0.232842	0.000361696	0.282123	0.248666	0.00718872	0.250927	0.598303	0.271634	0.343747	0.0979293	TRUE	TRUE	TRUE	TRUE	628.75	602.44	4.98	6.12	6.42	2.86	1.1	30.31	18.25	5.86	1.76	21.9
14:33:49	1179.46	1103.02	87.3648	578.806	502.359	87.3648	393.149	120.301	262.098	0.296365	0.232955	0.00022606	0.281897	0.248779	0.00691744	0.25156	0.59767	0.271408	0.343476	0.0974772	TRUE	TRUE	TRUE	TRUE	628.75	602.44	5.03	6.12	6.42	2.86	1.1	30.31	18.25	5.86	1.76	22
14:33:50	1168.54	1103.02	87.3648	589.727	502.359	87.3648	393.149	131.222	251.177	0.296365	0.232955	0.00045212	0.282236	0.248779	0.00732435	0.251515	0.597579	0.270368	0.343386	0.0989692	TRUE	TRUE	TRUE	TRUE	628.75	602.44	5.03	6.12	6.42	2.86	1.1	30.31	18.25	5.86	1.79	22
14:33:51	1179.46	1092.1	87.3648	589.727	502.359	76.4441	393.149	120.301	262.098	0.296139	0.232616	0.000316484	0.281784	0.248779	0.00709829	0.251469	0.597579	0.270142	0.342798	0.0978389	TRUE	TRUE	TRUE	TRUE	628.75	602.44	5.03	6.12	6.42	2.86	1.1	30.31	18.25	5.86	1.79	22
14:33:52	1179.46	1103.02	87.3648	578.806	502.359	87.3648	393.149	131.222	251.177	0.296817	0.233068	0.000316484	0.281784	0.248666	0.00718872	0.251786	0.597127	0.26978	0.342888	0.0994213	TRUE	TRUE	TRUE	TRUE	628.75	620.58	5.03	6.12	6.43	2.86	1.1	30.31	18.25	5.86	1.78	22
14:33:53	1179.46	1103.02	87.3648	589.727	502.359	87.3648	393.149	120.301	262.098	0.296365	0.233068	0.00045212	0.28201	0.248666	0.00691744	0.251741	0.596901	0.269464	0.342481	0.0993761	TRUE	TRUE	TRUE	TRUE	628.75	620.58	5.03	6.11	6.43	2.86	1.1	30.31	18.25	5.86	1.78	22
14:33:54	1168.54	1103.02	87.3648	589.727	502.359	87.3648	393.149	131.222	251.177	0.296365	0.233181	0.00045212	0.28201	0.248779	0.00736956	0.251379	0.59672	0.268876	0.342029	0.0991952	TRUE	TRUE	TRUE	TRUE	628.75	622.34	5.03	6.11	6.43	2.86	1.1	30.31	18.25	5.86	1.77	22
14:33:55	1179.46	1092.1	87.3648	589.727	502.359	76.4441	393.149	120.301	262.098	0.296704	0.233181	0.000497333	0.282236	0.248779	0.00673659	0.251831	0.59663	0.26865	0.341939	0.100461	TRUE	TRUE	TRUE	TRUE	628.75	622.34	5.03	6.11	6.43	2.86	1.1	30.31	18.25	5.86	1.77	22
14:33:56	1179.46	1103.02	87.3648	578.806	502.359	87.3648	393.149	131.222	262.098	0.296365	0.232955	0.000361696	0.281671	0.248666	0.00669138	0.250656	0.596313	0.268334	0.341577	0.0998282	TRUE	TRUE	TRUE	TRUE	628.75	623.84	5.03	6.11	6.42	2.86	1.1	34.02	18.25	5.86	1.79	22
14:33:57	1168.54	1103.02	76.4441	589.727	502.359	87.3648	393.149	120.301	251.177	0.296817	0.232955	0.000406908	0.282123	0.248666	0.00696265	0.251922	0.596087	0.268153	0.340989	0.0991952	TRUE	TRUE	TRUE	TRUE	628.75	623.84	5.03	6.1	6.42	2.86	1.1	34.02	18.25	5.86	1.79	22
14:33:58	1179.46	1092.1	87.3648	589.727	502.359	87.3648	393.149	131.222	262.098	0.296704	0.233294	0.000361696	0.282123	0.248666	0.00651053	0.251289	0.595861	0.267203	0.341306	0.100099	TRUE	TRUE	TRUE	TRUE	628.75	625.35	5.03	6.1	6.42	2.86	1.1	34.41	18.25	5.86	1.79	22
14:33:59	1179.46	1103.02	87.3648	578.806	502.359	76.4441	404.07	120.301	251.177	0.296591	0.233294	0.000271272	0.281784	0.248553	0.00705308	0.250972	0.595545	0.266842	0.340944	0.10028	TRUE	TRUE	TRUE	TRUE	628.75	625.35	5.03	6.1	6.42	2.86	1.1	34.41	18.25	5.86	1.79	22
14:34:00	1179.46	1103.02	87.3648	589.727	502.359	87.3648	393.149	131.222	262.098	0.296817	0.233181	0.000180848	0.282123	0.248666	0.00723393	0.251424	0.595274	0.266525	0.340311	0.0998734	TRUE	TRUE	TRUE	TRUE	628.75	625.35	5.03	6.1	6.42	2.86	1.1	34.73	18.25	5.81	1.79	22
14:34:01	1168.54	1092.1	87.3648	589.727	502.359	87.3648	393.149	120.301	251.177	0.296478	0.232955	0.000180848	0.281784	0.248779	0.00709829	0.251334	0.595047	0.266254	0.340175	0.100687	TRUE	TRUE	TRUE	TRUE	628.75	625.35	5.03	6.1	6.42	2.86	1.1	34.73	18.25	5.81	1.79	22
14:34:02	1179.46	1103.02	87.3648	589.727	502.359	87.3648	393.149	131.222	262.098	0.296704	0.233068	0.000361696	0.281671	0.248553	0.00718872	0.251108	0.594776	0.265576	0.34013	0.101094	TRUE	TRUE	TRUE	TRUE	657.66	625.35	5.03	6.1	6.42	2.86	1.1	35.11	18.25	5.88	1.79	22
14:34:03	1179.46	1103.02	87.3648	578.806	502.359	76.4441	393.149	120.301	251.177	0.296591	0.233294	0.000271272	0.282123	0.248666	0.00723393	0.251243	0.594776	0.26544	0.339542	0.100642	TRUE	TRUE	TRUE	TRUE	657.66	625.35	5.31	6.1	6.42	2.86	1.1	35.11	18.25	5.88	1.79	22
14:34:04	1168.54	1103.02	87.3648	589.727	502.359	87.3648	393.149	131.222	262.098	0.297608	0.233972	0.000406908	0.282123	0.248779	0.00755041	0.25156	0.594143	0.264943	0.339678	0.100552	TRUE	TRUE	TRUE	TRUE	650.02	625.35	5.31	6.1	6.42	2.86	1.1	35.11	18.25	5.87	1.79	22
14:34:05	1179.46	1092.1	87.3648	578.806	502.359	87.3648	393.149	120.301	262.098	0.297495	0.233746	0.00045212	0.28201	0.248553	0.00755041	0.251605	0.593917	0.264445	0.339362	0.102179	TRUE	TRUE	TRUE	TRUE	650.02	625.35	5.36	6.1	6.42	2.86	1.1	35.11	18.25	5.87	1.79	22
14:34:06	1179.46	1103.02	87.3648	589.727	502.359	76.4441	393.149	131.222	251.177	0.297608	0.234085	0.000180848	0.28201	0.248779	0.00709829	0.250791	0.593917	0.264084	0.339136	0.101456	TRUE	TRUE	TRUE	TRUE	653.51	625.35	5.36	6.1	6.42	2.86	1.1	35.11	18.25	5.85	1.79	22
14:34:07	1179.46	1103.02	76.4441	578.806	502.359	87.3648	393.149	120.301	262.098	0.296704	0.233181	0.000271272	0.281784	0.248553	0.00696265	0.250836	0.593646	0.263812	0.338638	0.101546	TRUE	TRUE	TRUE	TRUE	653.51	625.35	5.4	6.1	6.42	2.86	1.1	35.11	18.25	5.85	1.79	22
14:34:08	1179.46	1103.02	87.3648	589.727	502.359	87.3648	393.149	131.222	251.177	0.296478	0.233181	0.000135636	0.281784	0.248553	0.00700787	0.251605	0.593465	0.263224	0.338729	0.101682	TRUE	TRUE	TRUE	TRUE	650.9	625.35	5.4	6.1	6.42	2.86	1.1	35.11	18.25	5.85	1.79	22
14:34:09	1168.54	1092.1	87.3648	578.806	502.359	87.3648	393.149	120.301	262.098	0.296478	0.233181	0.000361696	0.281671	0.248666	0.00691744	0.250384	0.593013	0.263179	0.337734	0.100913	TRUE	TRUE	TRUE	TRUE	650.9	625.35	5.45	6.1	6.42	2.86	1.1	35.11	18.25	5.85	1.79	22
14:34:10	1179.46	1103.02	87.3648	589.727	502.359	76.4441	393.149	131.222	251.177	0.296817	0.233068	0.000271272	0.281897	0.248553	0.00727914	0.251469	0.592787	0.262546	0.33787	0.102677	TRUE	TRUE	TRUE	TRUE	650.9	625.35	5.45	6.1	6.42	2.86	1.1	35.11	18.25	5.85	1.77	22
14:34:11	1179.46	1103.02	87.3648	578.806	502.359	87.3648	393.149	131.222	262.098	0.296478	0.233181	4.52e-05	0.281671	0.248553	0.00687223	0.250791	0.592335	0.262185	0.337463	0.102586	TRUE	TRUE	TRUE	TRUE	650.9	625.35	5.45	6.1	6.42	2.86	1.1	35.11	18.25	5.85	1.77	22
14:34:12	1168.54	1103.02	87.3648	578.806	502.359	87.3648	393.149	120.301	251.177	0.296704	0.233068	0.000271272	0.281671	0.248327	0.00705308	0.250836	0.592199	0.261868	0.337553	0.103671	TRUE	TRUE	TRUE	TRUE	650.9	631.82	5.45	6.1	6.39	2.86	1.1	35.11	18.25	5.85	1.79	22
14:34:13	1179.46	1092.1	87.3648	589.727	502.359	87.3648	393.149	131.222	262.098	0.297382	0.233633	0.000271272	0.281784	0.248553	0.00691744	0.250836	0.592063	0.261597	0.337508	0.103038	TRUE	TRUE	TRUE	TRUE	650.9	631.82	5.45	6.11	6.39	2.86	1.1	35.11	18.25	5.85	1.79	22
14:34:14	1179.46	1103.02	87.3648	589.727	502.359	76.4441	393.149	120.301	251.177	0.296704	0.232729	0.000406908	0.28201	0.248553	0.00700787	0.250565	0.591747	0.261054	0.336875	0.103626	TRUE	TRUE	TRUE	TRUE	650.9	631.98	5.45	6.11	6.39	2.86	1.1	35.11	18.25	5.85	1.79	22
14:34:15	1179.46	1103.02	87.3648	578.806	502.359	87.3648	393.149	131.222	262.098	0.296704	0.232842	0.000180848	0.281784	0.248666	0.00718872	0.251605	0.591476	0.260828	0.336332	0.103716	TRUE	TRUE	TRUE	TRUE	650.9	631.98	5.45	6.11	6.39	2.86	1.1	35.11	18.25	5.85	1.79	22
14:34:16	1168.54	1103.02	87.3648	589.727	502.359	87.3648	393.149	120.301	262.098	0.29693	0.233633	0.000316484	0.282123	0.248666	0.00723393	0.251605	0.591024	0.260512	0.336151	0.104349	TRUE	TRUE	TRUE	TRUE	650.9	632.18	5.45	6.11	6.41	2.86	1.1	35.11	18.25	5.85	1.79	22
14:34:17	1179.46	1092.1	87.3648	589.727	502.359	76.4441	404.07	131.222	251.177	0.296591	0.232842	0.000271272	0.281784	0.248666	0.00660096	0.250204	0.590752	0.259969	0.335971	0.103264	TRUE	TRUE	TRUE	TRUE	650.9	632.18	5.45	6.1	6.41	2.86	1.1	37.19	18.25	5.85	1.79	22
14:34:18	1179.46	1103.02	76.4441	578.806	502.359	87.3648	393.149	131.222	262.098	0.296591	0.233068	0.000361696	0.281784	0.248553	0.00669138	0.251017	0.590481	0.259562	0.335519	0.104756	TRUE	TRUE	TRUE	TRUE	650.9	632.2	5.45	6.1	6.4	2.86	1.1	37.19	18.25	5.85	1.79	22
14:34:19	1179.46	1103.02	87.3648	589.727	502.359	87.3648	393.149	120.301	251.177	0.296252	0.233068	0.000406908	0.28201	0.248666	0.00691744	0.25156	0.590436	0.259246	0.335338	0.104756	TRUE	TRUE	TRUE	TRUE	650.9	632.2	5.45	6.09	6.4	2.86	1.1	37.4	18.25	5.85	1.79	22
14:34:20	1168.54	1092.1	87.3648	589.727	502.359	87.3648	393.149	131.222	262.098	0.296252	0.232616	0.000316484	0.282236	0.248779	0.00709829	0.251108	0.589984	0.258658	0.33484	0.104892	TRUE	TRUE	TRUE	TRUE	650.9	632.2	5.45	6.09	6.4	2.86	1.1	37.4	18.25	5.86	1.79	22
14:34:21	1179.46	1103.02	87.3648	578.806	502.359	76.4441	393.149	120.301	262.098	0.296026	0.232616	0.000180848	0.281784	0.248666	0.00669138	0.251922	0.589893	0.258342	0.334659	0.105706	TRUE	TRUE	TRUE	TRUE	650.9	632.2	5.45	6.09	6.4	2.86	1.1	37.83	18.25	5.86	1.79	22
14:34:22	1168.54	1103.02	87.3648	589.727	502.359	87.3648	393.149	131.222	251.177	0.296026	0.232616	0.000361696	0.281671	0.248553	0.00727914	0.250656	0.589396	0.258161	0.334614	0.105661	TRUE	TRUE	TRUE	TRUE	639.36	632.2	5.45	6.09	6.4	2.86	1.1	37.83	18.25	5.87	1.79	22
14:34:23	1179.46	1092.1	87.3648	589.727	502.359	87.3648	393.149	131.222	262.098	0.296252	0.232955	0.000316484	0.28201	0.248553	0.00700787	0.251243	0.588853	0.257799	0.333981	0.105525	TRUE	TRUE	TRUE	TRUE	639.36	632.2	5.75	6.09	6.4	2.86	1.1	38.15	18.25	5.87	1.79	22
14:34:24	1179.46	1092.1	87.3648	578.806	502.359	87.3648	393.149	120.301	251.177	0.296139	0.232842	0.000180848	0.28201	0.248553	0.00709829	0.251334	0.589034	0.257211	0.334117	0.106067	TRUE	TRUE	TRUE	TRUE	640.1	632.2	5.75	6.09	6.4	2.86	1.1	38.15	18.25	5.86	1.79	22
14:34:25	1179.46	1103.02	87.3648	589.727	502.359	76.4441	393.149	131.222	262.098	0.296252	0.232842	0.000316484	0.281784	0.248553	0.00700787	0.251289	0.588446	0.256895	0.334298	0.106339	TRUE	TRUE	TRUE	TRUE	640.1	632.2	5.79	6.09	6.4	2.86	1.1	38.15	18.25	5.86	1.79	22
14:34:26	1168.54	1092.1	87.3648	578.806	502.359	87.3648	393.149	120.301	251.177	0.296252	0.232955	9.04e-05	0.281671	0.248666	0.00718872	0.251741	0.588311	0.256398	0.333755	0.106836	TRUE	TRUE	TRUE	TRUE	639.89	632.2	5.79	6.09	6.4	2.86	1.1	38.15	18.25	5.84	1.79	22
14:34:27	1179.46	1103.02	87.3648	589.727	502.359	87.3648	393.149	131.222	262.098	0.296704	0.233407	0.00045212	0.28201	0.248553	0.00700787	0.251153	0.587904	0.2559	0.333574	0.105841	TRUE	TRUE	TRUE	TRUE	639.89	632.2	5.81	6.09	6.4	2.86	1.1	38.15	18.25	5.84	1.79	22
14:34:28	1179.46	1103.02	87.3648	578.806	502.359	76.4441	393.149	120.301	251.177	0.296365	0.232955	0.000316484	0.281671	0.248553	0.00664617	0.251017	0.587542	0.255267	0.333394	0.10661	TRUE	TRUE	TRUE	TRUE	636.69	632.2	5.81	6.09	6.4	2.86	1.1	38.15	18.25	5.84	1.79	22
14:34:29	1168.54	1092.1	76.4441	589.727	502.359	87.3648	393.149	131.222	262.098	0.296252	0.232842	0.000271272	0.28201	0.248553	0.0071435	0.250384	0.587316	0.255041	0.332942	0.108057	TRUE	TRUE	TRUE	TRUE	636.69	632.2	5.85	6.09	6.4	2.86	1.1	38.15	18.25	5.84	1.79	22
14:34:30	1179.46	1103.02	87.3648	589.727	502.359	87.3648	393.149	120.301	251.177	0.296817	0.233068	0.000361696	0.281784	0.248553	0.00741478	0.250294	0.587	0.254408	0.332851	0.10661	TRUE	TRUE	TRUE	TRUE	636.69	632.2	5.85	6.09	6.4	2.86	1.1	38.15	18.25	5.84	1.75	22
14:34:31	1179.46	1103.02	87.3648	578.806	502.359	87.3648	393.149	131.222	262.098	0.296365	0.232955	0.000316484	0.281784	0.248553	0.00682702	0.250882	0.586955	0.254001	0.332354	0.107605	TRUE	TRUE	TRUE	TRUE	636.69	632.2	5.85	6.09	6.4	2.86	1.1	38.15	18.25	5.84	1.75	22
14:34:32	1179.46	1092.1	87.3648	589.727	502.359	76.4441	393.149	131.222	251.177	0.296252	0.232842	0.00022606	0.281445	0.24844	0.00718872	0.252102	0.586683	0.253549	0.332354	0.107786	TRUE	TRUE	TRUE	TRUE	636.69	630.96	5.85	6.09	6.45	2.86	1.1	38.15	18.25	5.84	1.76	22
14:34:33	1168.54	1103.02	87.3648	578.806	502.359	87.3648	393.149	120.301	262.098	0.296139	0.232729	0.000316484	0.281558	0.24844	0.00732435	0.250972	0.586548	0.253007	0.331766	0.108012	TRUE	TRUE	TRUE	TRUE	636.69	630.96	5.85	6.1	6.45	2.86	1.1	38.15	18.25	5.84	1.76	22
14:34:34	1179.46	1092.1	87.3648	589.727	502.359	87.3648	393.149	131.222	262.098	0.296026	0.232842	0.000135636	0.281558	0.24844	0.0071435	0.251469	0.586548	0.253052	0.331721	0.108102	TRUE	TRUE	TRUE	TRUE	636.69	629.66	5.85	6.1	6.45	2.86	1.1	38.15	18.25	5.84	1.78	22
14:34:35	1179.46	1103.02	87.3648	589.727	502.359	76.4441	393.149	120.301	251.177	0.297269	0.233407	0.000316484	0.281558	0.248327	0.00723393	0.251605	0.586548	0.252283	0.331088	0.108599	TRUE	TRUE	TRUE	TRUE	636.69	629.66	5.85	6.09	6.45	2.86	1.1	38.15	18.25	5.84	1.78	22
14:34:36	1168.54	1103.02	87.3648	578.806	502.359	87.3648	393.149	131.222	262.098	0.296478	0.232955	0.00022606	0.281558	0.24844	0.0071435	0.250384	0.586502	0.25165	0.330862	0.108735	TRUE	TRUE	TRUE	TRUE	636.69	628.12	5.85	6.09	6.45	2.86	1.1	38.15	18.25	5.84	1.78	22
14:34:37	1179.46	1103.02	87.3648	589.727	502.359	87.3648	393.149	120.301	251.177	0.296139	0.232729	9.04e-05	0.281784	0.24844	0.00696265	0.250746	0.586141	0.251605	0.330862	0.108147	TRUE	TRUE	TRUE	TRUE	636.69	628.12	5.85	6.09	6.45	2.86	1.1	39.66	18.25	5.84	1.78	22
14:34:38	1179.46	1092.1	87.3648	578.806	502.359	87.3648	393.149	131.222	262.098	0.296252	0.232842	0.000361696	0.281558	0.24844	0.00687223	0.250927	0.586502	0.251605	0.330138	0.109097	TRUE	TRUE	TRUE	TRUE	636.69	627.12	5.85	6.09	6.45	2.86	1.1	39.66	18.25	5.84	1.78	22
14:34:39	1179.46	1103.02	87.3648	589.727	502.359	76.4441	393.149	131.222	251.177	0.296026	0.232729	0.000406908	0.281558	0.248327	0.00696265	0.250656	0.586186	0.250791	0.329912	0.109006	TRUE	TRUE	TRUE	TRUE	636.69	627.12	5.85	6.1	6.45	2.86	1.1	39.87	18.25	5.84	1.78	22
14:34:40	1168.54	1103.02	87.3648	589.727	502.359	87.3648	404.07	120.301	262.098	0.296252	0.232616	0.000361696	0.281558	0.24844	0.00700787	0.252012	0.586276	0.250475	0.329912	0.108916	TRUE	TRUE	TRUE	TRUE	636.69	627.12	5.85	6.1	6.45	2.86	1.1	39.87	18.25	5.85	1.78	22
14:34:41	1179.46	1092.1	87.3648	578.806	502.359	87.3648	393.149	131.222	262.098	0.296139	0.232616	4.52e-05	0.281558	0.24844	0.00732435	0.251108	0.58596	0.249977	0.329279	0.109368	TRUE	TRUE	TRUE	TRUE	636.69	627.12	5.85	6.1	6.45	2.86	1.1	40.16	18.25	5.85	1.78	22
14:34:42	1168.54	1103.02	87.3648	589.727	502.359	87.3648	393.149	120.301	251.177	0.296026	0.232729	0.000406908	0.281671	0.248327	0.00687223	0.251289	0.586095	0.249751	0.328963	0.110182	TRUE	TRUE	TRUE	TRUE	626.27	627.12	5.85	6.1	6.45	2.86	1.1	40.16	18.25	5.84	1.78	22
14:34:43	1179.46	1103.02	87.3648	578.806	502.359	76.4441	382.228	131.222	262.098	0.295913	0.232729	0.000316484	0.281671	0.24844	0.00732435	0.251108	0.586005	0.249706	0.328149	0.110182	TRUE	TRUE	TRUE	TRUE	626.27	627.12	6.09	6.1	6.45	2.86	1.1	40.33	18.25	5.84	1.78	22
14:34:44	1168.54	1092.1	76.4441	578.806	502.359	87.3648	404.07	120.301	251.177	0.295913	0.232277	0.00022606	0.281445	0.24844	0.00696265	0.250113	0.585915	0.248938	0.327968	0.110679	TRUE	TRUE	TRUE	TRUE	625.93	627.12	6.09	6.1	6.45	2.86	1.1	40.33	18.25	5.85	1.78	22
14:34:45	1179.46	1103.02	87.3648	589.727	502.359	87.3648	393.149	131.222	262.098	0.295913	0.232503	0.000135636	0.281671	0.248327	0.00691744	0.250656	0.58596	0.248621	0.327607	0.111629	TRUE	TRUE	TRUE	TRUE	625.93	627.12	6.12	6.1	6.45	2.86	1.1	40.33	18.25	5.85	1.78	22
14:34:46	1179.46	1092.1	87.3648	578.806	491.438	76.4441	393.149	131.222	251.177	0.296139	0.232842	4.52e-05	0.281671	0.248553	0.00664617	0.250746	0.585824	0.248305	0.32738	0.11077	TRUE	TRUE	TRUE	TRUE	625.88	627.12	6.12	6.1	6.45	2.86	1.1	40.33	18.25	5.84	1.78	22
14:34:47	1168.54	1103.02	87.3648	589.727	502.359	87.3648	393.149	120.301	262.098	0.296139	0.232729	0.000271272	0.281784	0.24844	0.00732435	0.251153	0.585643	0.247536	0.3272	0.110996	TRUE	TRUE	TRUE	TRUE	625.88	627.12	6.14	6.1	6.45	2.86	1.11	40.33	18.25	5.84	1.78	22
14:34:48	1179.46	1103.02	87.3648	578.806	502.359	87.3648	393.149	131.222	251.177	0.296026	0.232616	9.04e-05	0.281784	0.248553	0.00687223	0.25061	0.585734	0.247626	0.326567	0.1119	TRUE	TRUE	TRUE	TRUE	624.87	627.12	6.14	6.1	6.45	2.86	1.11	40.33	18.25	5.84	1.78	22
14:34:49	1179.46	1092.1	87.3648	589.727	502.359	76.4441	393.149	120.301	262.098	0.2958	0.232277	0.000271272	0.281784	0.248553	0.00723393	0.250927	0.585643	0.246903	0.326702	0.112262	TRUE	TRUE	TRUE	TRUE	624.87	627.12	6.17	6.1	6.45	2.86	1.11	40.33	18.25	5.84	1.78	22
14:34:50	1168.54	1103.02	87.3648	589.727	502.359	87.3648	393.149	131.222	251.177	0.295913	0.232503	0.000271272	0.281671	0.24844	0.00687223	0.25052	0.585553	0.246586	0.326024	0.111764	TRUE	TRUE	TRUE	TRUE	624.87	627.12	6.17	6.1	6.45	2.86	1.11	40.33	18.25	5.84	1.79	22
14:34:51	1179.46	1103.02	87.3648	578.806	502.359	87.3648	393.149	131.222	262.098	0.2958	0.232503	0.000180848	0.281784	0.248666	0.00723393	0.251198	0.585417	0.246089	0.325753	0.111448	TRUE	TRUE	TRUE	TRUE	624.87	627.12	6.17	6.1	6.45	2.86	1.11	40.33	18.25	5.84	1.79	22
14:34:52	1179.46	1092.1	87.3648	589.727	502.359	87.3648	393.149	120.301	262.098	0.296026	0.232503	0.000316484	0.281784	0.248553	0.00727914	0.250656	0.585598	0.245547	0.325481	0.112488	TRUE	TRUE	TRUE	TRUE	624.87	621.46	6.17	6.1	6.42	2.86	1.11	40.33	18.25	5.84	1.79	22
14:34:53	1168.54	1103.02	87.3648	578.806	502.359	76.4441	393.149	131.222	251.177	0.295913	0.232503	9.04e-05	0.281558	0.248553	0.00614884	0.250927	0.585372	0.24514	0.32521	0.112578	TRUE	TRUE	TRUE	TRUE	624.87	621.46	6.17	6.09	6.42	2.86	1.11	40.33	18.25	5.84	1.79	22
14:34:54	1179.46	1092.1	87.3648	589.727	502.359	87.3648	393.149	120.301	251.177	0.295913	0.232616	0.000271272	0.281671	0.24844	0.00687223	0.250565	0.585191	0.244642	0.325075	0.11398	TRUE	TRUE	TRUE	TRUE	624.87	620.56	6.17	6.09	6.42	2.86	1.11	40.33	18.25	5.84	1.79	22
14:34:55	1179.46	1103.02	87.3648	578.806	502.359	87.3648	393.149	131.222	262.098	0.296026	0.232955	9.04e-05	0.281558	0.24844	0.00678181	0.251017	0.585417	0.244507	0.324577	0.113482	TRUE	TRUE	TRUE	TRUE	624.87	620.56	6.17	6.09	6.42	2.86	1.11	40.33	18.25	5.84	1.79	22
14:34:56	1168.54	1103.02	87.3648	589.727	502.359	76.4441	393.149	120.301	262.098	0.296139	0.232842	0.000361696	0.281784	0.248553	0.00673659	0.251243	0.585146	0.244055	0.324487	0.114025	TRUE	TRUE	TRUE	TRUE	624.87	619.65	6.17	6.09	6.41	2.86	1.11	40.33	18.25	5.84	1.76	22
14:34:57	1179.46	1092.1	87.3648	589.727	502.359	87.3648	393.149	131.222	251.177	0.296817	0.233068	0.000135636	0.281784	0.248666	0.00718872	0.251153	0.585327	0.243467	0.32417	0.114432	TRUE	TRUE	TRUE	TRUE	624.87	619.65	6.17	6.09	6.41	2.86	1.11	41.56	18.25	5.84	1.76	22
14:34:58	1179.46	1103.02	87.3648	578.806	502.359	87.3648	393.149	120.301	262.098	0.295913	0.232842	0.000316484	0.281784	0.248666	0.00646532	0.250746	0.585101	0.243286	0.323628	0.11416	TRUE	TRUE	TRUE	TRUE	624.87	618.85	6.17	6.09	6.41	2.86	1.11	41.56	18.25	5.84	1.76	22
14:34:59	1168.54	1103.02	87.3648	578.806	502.359	87.3648	393.149	131.222	251.177	0.296365	0.233068	0.000271272	0.281671	0.248553	0.00678181	0.251469	0.585101	0.243105	0.323718	0.11398	TRUE	TRUE	TRUE	TRUE	624.87	618.85	6.17	6.09	6.41	2.86	1.11	41.75	18.25	5.84	1.76	22
14:35:00	1179.46	1092.1	87.3648	589.727	502.359	76.4441	393.149	120.301	262.098	0.296026	0.232842	0.000271272	0.281784	0.248553	0.0075052	0.251515	0.585056	0.242879	0.32313	0.115019	TRUE	TRUE	TRUE	TRUE	624.87	618.85	6.17	6.09	6.41	2.86	1.11	41.75	18.25	5.87	1.76	22
14:35:01	1179.46	1103.02	87.3648	589.727	502.359	87.3648	393.149	131.222	262.098	0.296026	0.232616	0.00022606	0.28201	0.248666	0.00709829	0.250746	0.584875	0.242111	0.32313	0.114748	TRUE	TRUE	TRUE	TRUE	624.87	618.85	6.17	6.09	6.41	2.86	1.11	41.91	18.25	5.87	1.76	22
14:35:02	1168.54	1103.02	87.3648	589.727	502.359	87.3648	393.149	131.222	251.177	0.296139	0.232729	0.000271272	0.282236	0.248892	0.00678181	0.250972	0.584739	0.241568	0.322859	0.115788	TRUE	TRUE	TRUE	TRUE	626.6	618.85	6.17	6.09	6.41	2.85	1.11	41.91	18.25	5.87	1.76	22
14:35:03	1179.46	1092.1	87.3648	578.806	502.359	76.4441	393.149	120.301	262.098	0.295913	0.232616	0.000361696	0.282236	0.248892	0.00709829	0.250972	0.584784	0.241161	0.322814	0.115381	TRUE	TRUE	TRUE	TRUE	626.6	618.85	6.35	6.09	6.41	2.85	1.11	42	18.25	5.87	1.76	22
14:35:04	1179.46	1103.02	87.3648	589.727	502.359	87.3648	404.07	131.222	251.177	0.296704	0.233407	0	0.282123	0.248779	0.0071435	0.25061	0.584604	0.240257	0.322407	0.114929	TRUE	TRUE	TRUE	TRUE	626.6	618.85	6.35	6.09	6.41	2.85	1.11	42	18.25	5.87	1.76	22
14:35:05	1179.46	1092.1	87.3648	578.806	513.28	87.3648	393.149	120.301	262.098	0.297043	0.233633	0	0.281897	0.248779	0.00705308	0.250701	0.584739	0.240257	0.322	0.116014	TRUE	TRUE	TRUE	TRUE	628.32	618.85	6.37	6.09	6.41	2.85	1.11	42	18.25	5.87	1.76	22
14:35:06	1179.46	1103.02	87.3648	589.727	502.359	87.3648	382.228	131.222	251.177	0.297156	0.233407	0.000271272	0.282123	0.248779	0.00682702	0.251379	0.584604	0.239895	0.321638	0.116783	TRUE	TRUE	TRUE	TRUE	628.32	618.85	6.37	6.09	6.41	2.85	1.11	42	18.25	5.84	1.76	22
14:35:07	1168.54	1103.02	87.3648	589.727	502.359	76.4441	404.07	120.301	262.098	0.297382	0.233746	0.000135636	0.282123	0.248779	0.00727914	0.251243	0.584468	0.239669	0.321684	0.116421	TRUE	TRUE	TRUE	TRUE	627.17	618.85	6.4	6.09	6.41	2.85	1.1	42	18.25	5.84	1.76	22
14:35:08	1179.46	1103.02	87.3648	578.806	502.359	87.3648	393.149	131.222	251.177	0.297495	0.233972	9.04e-05	0.282123	0.248666	0.00705308	0.250836	0.584513	0.238991	0.321232	0.115878	TRUE	TRUE	TRUE	TRUE	627.17	618.85	6.4	6.09	6.41	2.85	1.1	42	18.25	5.84	1.76	22
14:35:09	1179.46	1092.1	87.3648	589.727	502.359	87.3648	393.149	120.301	262.098	0.297495	0.233972	0.000271272	0.281784	0.248666	0.00687223	0.251243	0.584558	0.238493	0.321548	0.117777	TRUE	TRUE	TRUE	TRUE	627.3	618.85	6.42	6.09	6.41	2.85	1.11	42	18.25	5.84	1.76	22
14:35:10	1179.46	1103.02	87.3648	589.727	502.359	76.4441	393.149	131.222	262.098	0.297043	0.233746	0.00022606	0.281784	0.248779	0.00651053	0.24948	0.584604	0.238313	0.321096	0.117551	TRUE	TRUE	TRUE	TRUE	627.3	618.85	6.42	6.09	6.41	2.85	1.11	42	18.25	5.84	1.76	22
14:35:11	1179.46	1103.02	87.3648	589.727	502.359	87.3648	393.149	120.301	251.177	0.296365	0.232955	0.00022606	0.281897	0.248666	0.00669138	0.251243	0.584332	0.237906	0.320779	0.117461	TRUE	TRUE	TRUE	TRUE	627.3	618.85	6.42	6.09	6.41	2.85	1.11	42	18.25	5.84	1.76	22
14:35:12	1179.46	1103.02	87.3648	578.806	502.359	87.3648	393.149	131.222	262.098	0.296252	0.232842	0.000180848	0.28201	0.248779	0.00700787	0.252328	0.584287	0.237318	0.320373	0.117868	TRUE	TRUE	TRUE	TRUE	627.3	618.85	6.42	6.09	6.41	2.85	1.11	42	18.25	5.84	1.77	22
14:35:13	1179.46	1103.02	87.3648	589.727	502.359	87.3648	393.149	131.222	251.177	0.296365	0.232842	0.000406908	0.282123	0.248892	0.00678181	0.250882	0.584242	0.237363	0.320418	0.117597	TRUE	TRUE	TRUE	TRUE	627.3	615.77	6.42	6.08	6.43	2.85	1.11	42	18.25	5.84	1.77	22
14:35:14	1168.54	1092.1	87.3648	589.727	502.359	76.4441	393.149	120.301	262.098	0.296252	0.232955	0.000271272	0.282123	0.248779	0.0071435	0.250972	0.584242	0.23664	0.319604	0.117868	TRUE	TRUE	TRUE	TRUE	627.3	615.77	6.42	6.08	6.43	2.85	1.11	42	18.25	5.84	1.78	22
14:35:15	1179.46	1103.02	87.3648	578.806	502.359	87.3648	393.149	131.222	262.098	0.297043	0.233633	0.00022606	0.282236	0.248892	0.00651053	0.251198	0.584061	0.236685	0.319333	0.117371	TRUE	TRUE	TRUE	TRUE	627.3	615.67	6.42	6.08	6.42	2.85	1.11	42	18.25	5.84	1.78	22
14:35:16	1179.46	1103.02	87.3648	589.727	502.359	87.3648	393.149	120.301	251.177	0.296704	0.233407	0.000406908	0.282236	0.248779	0.00678181	0.250836	0.58397	0.235419	0.319694	0.119676	TRUE	TRUE	TRUE	TRUE	627.3	615.81	6.42	6.08	6.42	2.85	1.11	42	18.25	5.84	1.8	22
14:35:17	1179.46	1103.02	87.3648	589.727	502.359	87.3648	393.149	120.301	262.098	0.296139	0.232842	0.000316484	0.282123	0.248666	0.00687223	0.250972	0.583925	0.235419	0.319061	0.119043	TRUE	TRUE	TRUE	TRUE	627.3	615.81	6.42	6.08	6.43	2.85	1.11	43.07	18.25	5.84	1.8	22
14:35:18	1168.54	1103.02	87.3648	578.806	502.359	76.4441	393.149	120.301	251.177	0.2958	0.232729	0.000180848	0.282123	0.248779	0.00700787	0.251153	0.583744	0.235012	0.318745	0.119405	TRUE	TRUE	TRUE	TRUE	627.3	616.03	6.42	6.08	6.43	2.85	1.11	43.07	18.25	5.84	1.8	22
14:35:19	1179.46	1092.1	76.4441	589.727	502.359	87.3648	393.149	131.222	262.098	0.2958	0.232616	0.00045212	0.282236	0.248892	0.00678181	0.250701	0.583473	0.234741	0.318655	0.119315	TRUE	TRUE	TRUE	TRUE	627.3	616.03	6.42	6.08	6.42	2.85	1.11	43.14	18.25	5.84	1.8	22
14:35:20	1179.46	1103.02	87.3648	589.727	502.359	87.3648	393.149	120.301	251.177	0.296026	0.232616	0.000406908	0.282236	0.248892	0.00705308	0.251289	0.583744	0.234515	0.317796	0.119721	TRUE	TRUE	TRUE	TRUE	627.3	616.03	6.42	6.08	6.42	2.85	1.11	43.14	18.25	5.84	1.8	22
14:35:21	1179.46	1103.02	87.3648	578.806	502.359	76.4441	393.149	131.222	262.098	0.296139	0.232729	0.00022606	0.282349	0.248892	0.00727914	0.251017	0.583699	0.233972	0.318067	0.119405	TRUE	TRUE	TRUE	TRUE	627.3	616.03	6.42	6.08	6.42	2.85	1.11	43.28	18.25	5.86	1.8	22
14:35:22	1168.54	1092.1	87.3648	589.727	502.359	87.3648	393.149	120.301	251.177	0.296252	0.232842	0.000316484	0.282462	0.249005	0.00664617	0.250701	0.583609	0.232661	0.31766	0.119993	TRUE	TRUE	TRUE	TRUE	627.3	616.03	6.42	6.08	6.42	2.85	1.11	43.28	18.25	5.86	1.8	22
14:35:23	1179.46	1103.02	87.3648	589.727	502.359	87.3648	393.149	131.222	262.098	0.296139	0.232729	0.000361696	0.282349	0.248779	0.00691744	0.251153	0.583609	0.232345	0.317253	0.119812	TRUE	TRUE	TRUE	TRUE	616.74	616.03	6.51	6.08	6.42	2.85	1.11	43.48	18.25	5.84	1.8	22
14:35:24	1179.46	1103.02	87.3648	589.727	502.359	87.3648	393.149	120.301	251.177	0.296026	0.232616	0.000316484	0.282462	0.249005	0.00691744	0.251469	0.583473	0.232028	0.316846	0.120174	TRUE	TRUE	TRUE	TRUE	616.74	616.03	6.51	6.08	6.42	2.85	1.11	43.48	18.25	5.84	1.8	22
14:35:25	1168.54	1092.1	87.3648	578.806	502.359	76.4441	393.149	131.222	262.098	0.296252	0.232842	-0.000180848	0.282236	0.249005	0.00691744	0.251108	0.583383	0.231847	0.316665	0.120355	TRUE	TRUE	TRUE	TRUE	614.51	616.03	6.51	6.08	6.42	2.85	1.11	43.48	18.25	5.75	1.8	22
14:35:26	1179.46	1103.02	87.3648	589.727	502.359	87.3648	393.149	120.301	251.177	0.296026	0.232503	0.000135636	0.282349	0.249118	0.00741478	0.251786	0.583202	0.231124	0.316575	0.120987	TRUE	TRUE	TRUE	TRUE	614.51	616.03	6.52	6.08	6.42	2.85	1.11	43.48	18.25	5.75	1.8	22
14:35:27	1179.46	1103.02	87.3648	589.727	502.359	87.3648	393.149	131.222	262.098	0.296139	0.232729	4.52e-05	0.282349	0.248892	0.00682702	0.251243	0.583337	0.230536	0.316213	0.121666	TRUE	TRUE	TRUE	TRUE	618.61	616.03	6.52	6.08	6.42	2.85	1.1	43.48	18.25	5.86	1.8	22
14:35:28	1168.54	1092.1	87.3648	578.806	502.359	76.4441	393.149	120.301	251.177	0.296026	0.232729	0.000271272	0.282462	0.249005	0.00660096	0.250746	0.583292	0.229496	0.316077	0.120942	TRUE	TRUE	TRUE	TRUE	618.61	616.03	6.53	6.08	6.42	2.85	1.1	43.48	18.25	5.86	1.8	22
14:35:29	1179.46	1103.02	87.3648	589.727	502.359	87.3648	404.07	131.222	262.098	0.296478	0.233068	9.04e-05	0.282462	0.248892	0.00741478	0.250791	0.583157	0.229949	0.315535	0.121123	TRUE	TRUE	TRUE	TRUE	618.36	616.03	6.53	6.08	6.42	2.85	1.11	43.48	18.25	5.86	1.8	22
14:35:30	1168.54	1103.02	87.3648	589.727	502.359	87.3648	382.228	120.301	251.177	0.296252	0.232842	0.000406908	0.282462	0.249005	0.00660096	0.251289	0.583112	0.228637	0.31549	0.121892	TRUE	TRUE	TRUE	TRUE	618.36	616.03	6.54	6.08	6.42	2.85	1.11	43.48	18.25	5.86	1.8	22
14:35:31	1179.46	1092.1	87.3648	578.806	502.359	87.3648	404.07	131.222	262.098	0.296252	0.233181	0.00022606	0.282462	0.249118	0.00664617	0.251017	0.583112	0.228366	0.315444	0.122479	TRUE	TRUE	TRUE	TRUE	618.36	616.03	6.54	6.08	6.42	2.85	1.11	43.48	18.25	5.86	1.81	22.1
14:35:32	1179.46	1103.02	87.3648	589.727	502.359	76.4441	393.149	120.301	262.098	0.296365	0.233181	0.000135636	0.282575	0.249118	0.00709829	0.251153	0.583066	0.227507	0.314812	0.12162	TRUE	TRUE	TRUE	TRUE	618.36	616.03	6.54	6.08	6.42	2.85	1.11	43.48	18.25	5.86	1.81	22.2
14:35:33	1179.46	1092.1	87.3648	589.727	502.359	87.3648	393.149	131.222	251.177	0.296704	0.233294	0.00022606	0.282349	0.248892	0.00687223	0.250746	0.582614	0.227462	0.31445	0.122977	TRUE	TRUE	TRUE	TRUE	618.36	620.62	6.54	6.08	6.41	2.85	1.11	43.48	18.25	5.86	1.78	22.2
14:35:34	1168.54	1103.02	87.3648	578.806	502.359	87.3648	393.149	131.222	262.098	0.296365	0.233068	0.00022606	0.282349	0.249005	0.00709829	0.251108	0.58284	0.22701	0.314133	0.122705	TRUE	TRUE	TRUE	TRUE	618.36	620.62	6.54	6.09	6.41	2.85	1.11	43.48	18.25	5.86	1.78	22.2
14:35:35	1179.46	1103.02	87.3648	589.727	513.28	76.4441	393.149	120.301	251.177	0.296252	0.232729	0.00022606	0.282123	0.248666	0.00664617	0.251108	0.582795	0.22701	0.313998	0.123791	TRUE	TRUE	TRUE	TRUE	618.36	622.17	6.54	6.09	6.4	2.85	1.11	43.48	18.25	5.86	1.79	22.2
14:35:36	1179.46	1092.1	87.3648	589.727	502.359	87.3648	393.149	131.222	262.098	0.296139	0.232842	0.000180848	0.281784	0.248666	0.00696265	0.250746	0.582433	0.226919	0.313681	0.123067	TRUE	TRUE	TRUE	TRUE	618.36	622.17	6.54	6.09	6.4	2.85	1.11	43.48	18.25	5.86	1.79	22.2
14:35:37	1168.54	1103.02	87.3648	578.806	502.359	87.3648	393.149	120.301	251.177	0.297043	0.233407	0.00022606	0.281671	0.248553	0.00651053	0.250294	0.582388	0.225653	0.313726	0.123248	TRUE	TRUE	TRUE	TRUE	618.36	623.85	6.54	6.09	6.4	2.85	1.11	44.42	18.25	5.86	1.8	22.1
14:35:38	1179.46	1103.02	87.3648	589.727	491.438	87.3648	393.149	131.222	262.098	0.297382	0.233859	0.000135636	0.281671	0.24844	0.00709829	0.250746	0.582479	0.225472	0.313274	0.123474	TRUE	TRUE	TRUE	TRUE	618.36	623.85	6.54	6.09	6.4	2.85	1.11	44.42	18.25	5.86	1.8	22
14:35:39	1179.46	1103.02	87.3648	578.806	502.359	76.4441	393.149	120.301	262.098	0.296591	0.233407	9.04e-05	0.281671	0.248666	0.0071435	0.250927	0.582298	0.225698	0.312641	0.123881	TRUE	TRUE	TRUE	TRUE	618.36	628.43	6.54	6.09	6.39	2.85	1.11	44.54	18.25	5.86	1.8	22
14:35:40	1179.46	1103.02	87.3648	589.727	502.359	87.3648	393.149	131.222	251.177	0.297269	0.233407	0.000180848	0.281671	0.248553	0.00673659	0.251289	0.582388	0.224975	0.312867	0.124604	TRUE	TRUE	TRUE	TRUE	618.36	628.43	6.54	6.09	6.39	2.85	1.11	44.54	18.25	5.86	1.8	22.2
14:35:41	1179.46	1092.1	87.3648	589.727	502.359	87.3648	393.149	120.301	262.098	0.296591	0.232955	0.000406908	0.281558	0.248666	0.00664617	0.250972	0.582252	0.224342	0.312913	0.124469	TRUE	TRUE	TRUE	TRUE	618.36	628.43	6.54	6.09	6.39	2.85	1.11	44.7	18.25	5.84	1.8	22.2
14:35:42	1179.46	1103.02	87.3648	578.806	502.359	87.3648	404.07	131.222	262.098	0.296591	0.233181	0.000271272	0.281558	0.24844	0.00678181	0.250972	0.582479	0.224297	0.312325	0.125192	TRUE	TRUE	TRUE	TRUE	618.36	628.43	6.54	6.09	6.39	2.85	1.11	44.7	18.25	5.84	1.8	22.2
14:35:43	1168.54	1103.02	87.3648	589.727	502.359	76.4441	393.149	120.301	251.177	0.296365	0.232842	0.000271272	0.281671	0.248327	0.00673659	0.251153	0.581755	0.223393	0.311873	0.125192	TRUE	TRUE	TRUE	TRUE	612.83	628.43	6.54	6.09	6.39	2.85	1.11	44.7	18.25	5.84	1.8	22
14:35:44	1168.54	1103.02	76.4441	589.727	502.359	87.3648	393.149	131.222	251.177	0.296139	0.232955	0.000271272	0.281671	0.248553	0.00687223	0.251515	0.582117	0.223212	0.311692	0.125056	TRUE	TRUE	TRUE	TRUE	612.83	628.43	6.6	6.09	6.39	2.85	1.11	44.87	18.25	5.84	1.8	22
14:35:45	1179.46	1092.1	87.3648	578.806	502.359	87.3648	393.149	120.301	262.098	0.296817	0.233407	9.04e-05	0.281671	0.24844	0.00651053	0.251063	0.582026	0.222895	0.311466	0.12569	TRUE	TRUE	TRUE	TRUE	618.26	628.43	6.6	6.09	6.39	2.85	1.11	44.87	18.25	5.73	1.8	22
14:35:46	1179.46	1103.02	87.3648	589.727	502.359	76.4441	393.149	131.222	262.098	0.296252	0.232955	0.000406908	0.281558	0.248553	0.00651053	0.25061	0.581846	0.222082	0.311014	0.125599	TRUE	TRUE	TRUE	TRUE	618.26	628.43	6.6	6.09	6.39	2.85	1.11	44.87	18.25	5.73	1.8	22
14:35:47	1168.54	1103.02	87.3648	578.806	502.359	87.3648	393.149	120.301	251.177	0.296139	0.232955	0.000180848	0.281558	0.248553	0.00687223	0.251108	0.581846	0.222036	0.311466	0.125825	TRUE	TRUE	TRUE	TRUE	616.74	628.43	6.6	6.09	6.39	2.85	1.11	44.87	18.25	5.86	1.8	22.1
14:35:48	1179.46	1092.1	87.3648	589.727	502.359	87.3648	393.149	131.222	262.098	0.296139	0.232729	0.000180848	0.281445	0.24844	0.00673659	0.25052	0.58171	0.221539	0.310697	0.126549	TRUE	TRUE	TRUE	TRUE	616.74	628.43	6.62	6.09	6.39	2.85	1.11	44.87	18.25	5.86	1.8	22.2
14:35:49	1179.46	1103.02	87.3648	589.727	502.359	87.3648	393.149	120.301	251.177	0.295913	0.232616	0.000271272	0.281445	0.24844	0.00651053	0.250294	0.581846	0.220997	0.310697	0.126368	TRUE	TRUE	TRUE	TRUE	597.68	628.43	6.62	6.09	6.39	2.85	1.11	44.87	18.25	5.86	1.8	22.2
14:35:50	1168.54	1103.02	87.3648	578.806	502.359	76.4441	393.149	131.222	262.098	0.296252	0.232729	0.000271272	0.281558	0.248553	0.00646532	0.250836	0.581619	0.220725	0.310607	0.12786	TRUE	TRUE	TRUE	TRUE	597.68	628.43	6.63	6.09	6.39	2.85	1.11	44.87	18.25	5.86	1.8	22.2
14:35:51	1179.46	1092.1	87.3648	589.727	502.359	87.3648	393.149	120.301	251.177	0.296139	0.232729	0.000406908	0.281671	0.24844	0.00673659	0.250836	0.581619	0.220047	0.310155	0.126096	TRUE	TRUE	TRUE	TRUE	597.68	628.43	6.63	6.09	6.39	2.85	1.11	44.87	18.25	5.86	1.81	22.2
14:35:52	1179.46	1103.02	87.3648	589.727	502.359	87.3648	393.149	131.222	262.098	0.296139	0.232616	0.000135636	0.281784	0.248327	0.00718872	0.251243	0.581484	0.220228	0.309748	0.127227	TRUE	TRUE	TRUE	TRUE	597.68	628.43	6.63	6.09	6.39	2.85	1.11	44.87	18.25	5.86	1.81	22.2
14:35:53	1168.54	1103.02	87.3648	578.806	502.359	76.4441	393.149	120.301	251.177	0.2958	0.232616	0.000316484	0.281445	0.24844	0.00651053	0.250294	0.581665	0.219414	0.309386	0.127272	TRUE	TRUE	TRUE	TRUE	597.68	637.56	6.63	6.09	6.37	2.85	1.11	44.87	18.25	5.86	1.82	22.2
14:35:54	1179.46	1092.1	87.3648	589.727	502.359	87.3648	393.149	131.222	262.098	0.296478	0.233294	0.00022606	0.281671	0.248553	0.00691744	0.250836	0.581303	0.218917	0.309431	0.128176	TRUE	TRUE	TRUE	TRUE	597.68	637.56	6.63	6.1	6.37	2.85	1.11	44.87	18.25	5.86	1.82	22.2
14:35:55	1179.46	1103.02	87.3648	578.806	502.359	87.3648	382.228	120.301	262.098	0.297269	0.233746	9.04e-05	0.281671	0.248553	0.00709829	0.249435	0.581529	0.218691	0.30916	0.128312	TRUE	TRUE	TRUE	TRUE	597.68	639.01	6.63	6.1	6.37	2.85	1.11	44.87	18.25	5.86	1.82	22.2
14:35:56	1168.54	1103.02	87.3648	589.727	502.359	76.4441	393.149	131.222	251.177	0.296365	0.233068	0.000135636	0.28201	0.24844	0.00664617	0.250972	0.581348	0.218465	0.308391	0.128221	TRUE	TRUE	TRUE	TRUE	597.68	639.01	6.63	6.1	6.37	2.85	1.11	44.87	18.25	5.86	1.82	22.2
14:35:57	1179.46	1103.02	87.3648	589.727	502.359	87.3648	404.07	120.301	262.098	0.296365	0.232955	0.000361696	0.281558	0.248553	0.00718872	0.250746	0.581077	0.217832	0.309069	0.1289	TRUE	TRUE	TRUE	TRUE	597.68	640.36	6.63	6.1	6.37	2.85	1.11	44.87	18.25	5.86	1.82	22.2
14:35:58	1179.46	1092.1	87.3648	589.727	502.359	87.3648	393.149	131.222	251.177	0.296139	0.232616	0.000180848	0.281784	0.248666	0.00718872	0.251063	0.581213	0.217425	0.308256	0.128583	TRUE	TRUE	TRUE	TRUE	597.68	640.36	6.63	6.1	6.37	2.85	1.11	45.77	18.25	5.86	1.82	22.2
14:35:59	1168.54	1103.02	87.3648	578.806	502.359	87.3648	393.149	120.301	262.098	0.295913	0.232729	0.000406908	0.281897	0.248553	0.00709829	0.250656	0.580986	0.216927	0.307668	0.129126	TRUE	TRUE	TRUE	TRUE	597.68	641.81	6.63	6.1	6.37	2.85	1.11	45.77	18.25	5.86	1.82	22.2
14:36:00	1179.46	1103.02	87.3648	589.727	502.359	76.4441	393.149	131.222	251.177	0.296139	0.232955	0.000180848	0.281784	0.248553	0.00646532	0.250113	0.58067	0.216747	0.307623	0.129487	TRUE	TRUE	TRUE	TRUE	597.68	641.81	6.63	6.1	6.37	2.85	1.11	45.94	18.25	5.86	1.82	22.2
14:36:01	1168.54	1092.1	87.3648	578.806	502.359	87.3648	393.149	120.301	262.098	0.296252	0.232616	0.000271272	0.281671	0.248553	0.00682702	0.250249	0.580761	0.215662	0.307351	0.128583	TRUE	TRUE	TRUE	TRUE	597.68	641.81	6.63	6.1	6.37	2.85	1.11	45.94	18.25	5.84	1.82	22.2
14:36:02	1179.46	1103.02	76.4441	589.727	502.359	87.3648	393.149	131.222	251.177	0.296026	0.23239	0.000135636	0.281671	0.248553	0.00619405	0.250565	0.580715	0.215752	0.307397	0.129849	TRUE	TRUE	TRUE	TRUE	597.68	641.81	6.63	6.1	6.37	2.85	1.11	46.03	18.25	5.84	1.82	22.2
14:36:03	1179.46	1103.02	87.3648	589.727	502.359	76.4441	382.228	120.301	262.098	0.29693	0.233633	9.04e-05	0.281897	0.248666	0.00673659	0.250294	0.581122	0.215164	0.307125	0.13003	TRUE	TRUE	TRUE	TRUE	593.04	641.81	6.63	6.1	6.37	2.85	1.11	46.03	18.25	5.89	1.82	22.2
14:36:04	1179.46	1103.02	87.3648	589.727	502.359	87.3648	393.149	131.222	251.177	0.296817	0.233407	0.00022606	0.281671	0.248553	0.00682702	0.25052	0.580896	0.215254	0.306945	0.130663	TRUE	TRUE	TRUE	TRUE	593.04	641.81	6.66	6.1	6.37	2.85	1.11	46.14	18.25	5.89	1.82	22.2
14:36:05	1179.46	1092.1	87.3648	578.806	502.359	87.3648	404.07	120.301	262.098	0.296252	0.232729	0.00022606	0.28201	0.248553	0.00678181	0.250927	0.58067	0.214576	0.306357	0.130211	TRUE	TRUE	TRUE	TRUE	585.61	641.81	6.66	6.1	6.37	2.85	1.11	46.14	18.25	5.89	1.82	22.2
14:36:06	1168.54	1103.02	87.3648	589.727	502.359	76.4441	382.228	131.222	262.098	0.297043	0.233633	0	0.282123	0.248779	0.00705308	0.250339	0.580761	0.214215	0.306312	0.130301	TRUE	TRUE	TRUE	TRUE	585.61	641.81	6.66	6.1	6.37	2.85	1.11	46.14	18.25	5.89	1.82	22.2
14:36:07	1179.46	1103.02	87.3648	589.727	502.359	87.3648	404.07	120.301	251.177	0.296478	0.233407	-9.04e-05	0.282236	0.248892	0.00709829	0.250882	0.580218	0.213446	0.30604	0.130527	TRUE	TRUE	TRUE	TRUE	587.63	641.81	6.66	6.1	6.37	2.85	1.11	46.14	18.25	5.88	1.82	22.2
14:36:08	1179.46	1103.02	87.3648	578.806	502.359	87.3648	393.149	131.222	262.098	0.296139	0.232842	0.00022606	0.282123	0.248779	0.00696265	0.250746	0.58058	0.213582	0.305453	0.131612	TRUE	TRUE	TRUE	TRUE	587.63	641.81	6.67	6.1	6.37	2.85	1.11	46.14	18.25	5.88	1.82	22.2
14:36:09	1168.54	1092.1	87.3648	589.727	502.359	87.3648	393.149	120.301	251.177	0.296026	0.232842	0.000316484	0.282236	0.248779	0.00642011	0.25043	0.580444	0.212723	0.305317	0.131205	TRUE	TRUE	TRUE	TRUE	588.17	641.81	6.67	6.1	6.37	2.85	1.11	46.14	18.25	5.88	1.82	22.2
14:36:10	1179.46	1103.02	87.3648	578.806	502.359	76.4441	393.149	131.222	262.098	0.296252	0.232729	0.000271272	0.282123	0.248779	0.00660096	0.251017	0.580173	0.212813	0.304955	0.130798	TRUE	TRUE	TRUE	TRUE	588.17	641.81	6.68	6.1	6.37	2.85	1.11	46.14	18.25	5.88	1.82	22.2
14:36:11	1179.46	1103.02	87.3648	589.727	502.359	87.3648	393.149	120.301	251.177	0.296704	0.233181	-0.000135636	0.282123	0.248779	0.00664617	0.250023	0.580173	0.212316	0.30491	0.131522	TRUE	TRUE	TRUE	TRUE	588.17	641.81	6.68	6.1	6.37	2.85	1.11	46.14	18.25	5.88	1.83	22.2
14:36:12	1168.54	1092.1	87.3648	589.727	502.359	87.3648	393.149	131.222	262.098	0.297269	0.233633	0.000180848	0.282123	0.248779	0.00705308	0.250836	0.580354	0.211638	0.304729	0.131612	TRUE	TRUE	TRUE	TRUE	588.17	641.81	6.68	6.1	6.37	2.85	1.11	46.14	18.25	5.88	1.83	22.2
14:36:13	1179.46	1103.02	87.3648	578.806	502.359	87.3648	393.149	120.301	251.177	0.297269	0.233972	4.52e-05	0.281671	0.248553	0.00664617	0.250927	0.580308	0.211366	0.304503	0.131974	TRUE	TRUE	TRUE	TRUE	588.17	649.81	6.68	6.1	6.36	2.85	1.11	46.14	18.25	5.88	1.83	22.2
14:36:14	1179.46	1103.02	87.3648	589.727	502.359	76.4441	393.149	120.301	262.098	0.297156	0.23352	0	0.281671	0.248553	0.00709829	0.250701	0.579992	0.210643	0.304051	0.133014	TRUE	TRUE	TRUE	TRUE	588.17	649.81	6.68	6.11	6.36	2.85	1.11	46.14	18.25	5.88	1.83	22.2
14:36:15	1179.46	1103.02	87.3648	578.806	502.359	87.3648	393.149	131.222	251.177	0.297269	0.233633	4.52e-05	0.281445	0.24844	0.00655575	0.250791	0.579901	0.210553	0.303554	0.132064	TRUE	TRUE	TRUE	TRUE	588.17	650.63	6.68	6.11	6.36	2.85	1.11	46.14	18.25	5.88	1.83	22.2
14:36:16	1179.46	1092.1	87.3648	589.727	502.359	87.3648	393.149	120.301	262.098	0.296478	0.233068	0.000180848	0.281558	0.248327	0.00691744	0.250791	0.580037	0.210507	0.303599	0.132788	TRUE	TRUE	TRUE	TRUE	588.17	650.63	6.68	6.11	6.36	2.85	1.11	46.14	18.25	5.88	1.83	22.2
14:36:17	1179.46	1103.02	87.3648	589.727	502.359	76.4441	393.149	131.222	251.177	0.296026	0.232842	0.000271272	0.281558	0.248214	0.00678181	0.250158	0.579856	0.2101	0.302966	0.132652	TRUE	TRUE	TRUE	TRUE	588.17	651.52	6.68	6.11	6.36	2.85	1.11	46.14	18.25	5.88	1.82	22.2
14:36:18	1179.46	1103.02	87.3648	578.806	502.359	87.3648	393.149	120.301	262.098	0.296591	0.232955	0.00022606	0.281332	0.248214	0.00651053	0.25061	0.579766	0.209241	0.302649	0.133873	TRUE	TRUE	TRUE	TRUE	588.17	651.52	6.68	6.11	6.36	2.85	1.11	46.98	18.25	5.88	1.82	22.2
14:36:19	1179.46	1092.1	87.3648	589.727	502.359	87.3648	393.149	131.222	262.098	0.296817	0.233407	0.000135636	0.281558	0.24844	0.00687223	0.250158	0.579675	0.208337	0.302469	0.133828	TRUE	TRUE	TRUE	TRUE	588.17	652.56	6.68	6.11	6.36	2.85	1.11	46.98	18.25	5.88	1.82	22.2
14:36:20	1168.54	1103.02	87.3648	578.806	502.359	76.4441	393.149	120.301	251.177	0.296139	0.232955	0.000180848	0.281558	0.24844	0.00682702	0.250927	0.579811	0.208427	0.302333	0.134822	TRUE	TRUE	TRUE	TRUE	588.17	652.56	6.68	6.11	6.36	2.85	1.11	47.05	18.25	5.88	1.82	22.2
14:36:21	1179.46	1103.02	87.3648	589.727	502.359	87.3648	393.149	131.222	262.098	0.2958	0.232616	0.000361696	0.281558	0.248327	0.00669138	0.250204	0.579268	0.208066	0.301745	0.134687	TRUE	TRUE	TRUE	TRUE	588.17	652.56	6.68	6.11	6.36	2.85	1.11	47.05	18.25	5.86	1.82	22.2
14:36:22	1168.54	1103.02	87.3648	578.806	502.359	87.3648	393.149	120.301	251.177	0.296139	0.232729	0.000271272	0.281332	0.248327	0.00660096	0.250339	0.579404	0.207659	0.301519	0.134596	TRUE	TRUE	TRUE	TRUE	588.17	652.56	6.68	6.11	6.36	2.85	1.11	47.16	18.25	5.86	1.82	22.2
14:36:23	1179.46	1092.1	87.3648	589.727	502.359	87.3648	393.149	131.222	262.098	0.296026	0.232616	0.000271272	0.281445	0.248327	0.00646532	0.250701	0.579811	0.206755	0.301384	0.13532	TRUE	TRUE	TRUE	TRUE	584.03	652.56	6.68	6.11	6.36	2.84	1.11	47.16	18.25	5.86	1.82	22.2
14:36:24	1179.46	1103.02	87.3648	578.806	502.359	76.4441	393.149	120.301	251.177	0.2958	0.232616	0.000271272	0.281445	0.248327	0.00614884	0.250746	0.579268	0.206755	0.301248	0.135907	TRUE	TRUE	TRUE	TRUE	584.03	652.56	6.73	6.11	6.36	2.84	1.11	47.23	18.25	5.86	1.82	22.2
14:36:25	1168.54	1103.02	87.3648	589.727	502.359	87.3648	393.149	131.222	262.098	0.2958	0.232616	0.000271272	0.281445	0.248327	0.00709829	0.250701	0.579449	0.206348	0.30075	0.136269	TRUE	TRUE	TRUE	TRUE	589.03	652.56	6.73	6.11	6.36	2.84	1.11	47.23	18.25	5.86	1.82	22.2
14:36:26	1179.46	1092.1	76.4441	578.806	502.359	87.3648	393.149	120.301	251.177	0.295687	0.23239	0.000135636	0.281332	0.24844	0.00669138	0.25052	0.579359	0.20567	0.300977	0.13654	TRUE	TRUE	TRUE	TRUE	589.03	652.56	6.74	6.11	6.36	2.84	1.11	47.23	18.25	5.86	1.82	22.2
14:36:27	1168.54	1103.02	87.3648	589.727	502.359	76.4441	393.149	131.222	262.098	0.296591	0.232842	0.00022606	0.281445	0.248327	0.00646532	0.251153	0.579359	0.205624	0.300163	0.136721	TRUE	TRUE	TRUE	TRUE	584.1	652.56	6.74	6.11	6.36	2.84	1.11	47.23	18.25	5.86	1.82	22.2
14:36:28	1179.46	1103.02	87.3648	589.727	502.359	87.3648	393.149	120.301	251.177	0.296704	0.233633	0.000406908	0.281671	0.248327	0.00642011	0.249977	0.578952	0.204901	0.299846	0.137173	TRUE	TRUE	TRUE	TRUE	584.1	652.56	6.74	6.11	6.36	2.84	1.11	47.23	18.25	5.86	1.82	22.2
14:36:29	1179.46	1103.02	87.3648	578.806	502.359	87.3648	393.149	131.222	262.098	0.296252	0.233068	0.000406908	0.281784	0.24844	0.00673659	0.251605	0.578907	0.204811	0.299756	0.137445	TRUE	TRUE	TRUE	TRUE	581.26	652.56	6.74	6.11	6.36	2.84	1.11	47.23	18.25	5.86	1.82	22.2
14:36:30	1179.46	1092.1	87.3648	589.727	491.438	76.4441	393.149	120.301	262.098	0.296252	0.233068	0.000271272	0.281784	0.248666	0.00700787	0.250701	0.578907	0.204404	0.299846	0.138575	TRUE	TRUE	TRUE	TRUE	581.26	652.56	6.74	6.11	6.36	2.84	1.11	47.23	18.25	5.86	1.82	22.2
14:36:31	1168.54	1103.02	87.3648	578.806	513.28	87.3648	393.149	120.301	251.177	0.296252	0.232842	0.000135636	0.281784	0.248553	0.00718872	0.250701	0.579042	0.203635	0.299394	0.138439	TRUE	TRUE	TRUE	TRUE	581.26	652.56	6.74	6.11	6.36	2.84	1.11	47.23	18.25	5.86	1.79	22.2
14:36:32	1179.46	1103.02	87.3648	589.727	491.438	87.3648	393.149	131.222	262.098	0.296139	0.232842	0.000180848	0.281784	0.24844	0.00651053	0.249797	0.578816	0.203499	0.299213	0.137535	TRUE	TRUE	TRUE	TRUE	581.26	652.56	6.74	6.11	6.36	2.84	1.11	47.23	18.25	5.86	1.79	22.2
14:36:33	1179.46	1103.02	87.3648	589.727	502.359	76.4441	393.149	131.222	251.177	0.2958	0.232616	0.000135636	0.281784	0.248666	0.00660096	0.250701	0.578681	0.202686	0.298852	0.138485	TRUE	TRUE	TRUE	TRUE	581.26	658.44	6.74	6.11	6.35	2.84	1.11	47.23	18.25	5.86	1.8	22.2
14:36:34	1168.54	1092.1	87.3648	589.727	502.359	87.3648	393.149	120.301	262.098	0.295913	0.232729	0.000180848	0.281784	0.248666	0.00687223	0.251153	0.578726	0.202866	0.298626	0.137987	TRUE	TRUE	TRUE	TRUE	581.26	658.44	6.74	6.12	6.35	2.84	1.11	47.23	18.25	5.86	1.8	22.2
14:36:35	1179.46	1103.02	87.3648	578.806	491.438	87.3648	393.149	131.222	251.177	0.296365	0.233068	9.04e-05	0.281784	0.248666	0.00619405	0.250656	0.578635	0.202279	0.298309	0.139027	TRUE	TRUE	TRUE	TRUE	581.26	659	6.74	6.12	6.35	2.84	1.11	47.23	18.25	5.86	1.81	22.2
14:36:36	1179.46	1103.02	87.3648	589.727	502.359	87.3648	393.149	120.301	262.098	0.296139	0.232729	9.04e-05	0.281897	0.248553	0.00669138	0.250836	0.578455	0.201872	0.298354	0.139615	TRUE	TRUE	TRUE	TRUE	581.26	659	6.74	6.12	6.35	2.84	1.11	47.23	18.25	5.86	1.81	22.2
14:36:37	1168.54	1092.1	87.3648	578.806	502.359	76.4441	393.149	131.222	262.098	0.296139	0.232729	0.000361696	0.28201	0.248553	0.00673659	0.250972	0.578816	0.201374	0.297993	0.140067	TRUE	TRUE	TRUE	TRUE	581.26	659.68	6.74	6.12	6.36	2.84	1.11	47.23	18.25	5.86	1.82	22.2
14:36:38	1179.46	1103.02	87.3648	589.727	502.359	87.3648	393.149	120.301	251.177	0.296478	0.233294	0.000180848	0.282123	0.248666	0.00614884	0.250475	0.578364	0.201058	0.297857	0.139977	TRUE	TRUE	TRUE	TRUE	581.26	659.68	6.74	6.12	6.36	2.84	1.11	47.98	18.25	5.86	1.82	22.2
14:36:39	1179.46	1103.02	87.3648	589.727	502.359	87.3648	393.149	131.222	262.098	0.297269	0.233859	0.000316484	0.282123	0.248779	0.00664617	0.25061	0.578093	0.200606	0.29745	0.140745	TRUE	TRUE	TRUE	TRUE	581.26	660.3	6.74	6.12	6.36	2.84	1.11	47.98	18.25	5.86	1.82	22.2
14:36:40	1179.46	1103.02	87.3648	578.806	502.359	76.4441	393.149	120.301	251.177	0.296817	0.233859	0.000135636	0.282123	0.248779	0.00660096	0.250972	0.578319	0.200289	0.296953	0.140293	TRUE	TRUE	TRUE	TRUE	581.26	660.3	6.74	6.12	6.36	2.84	1.11	48.06	18.25	5.86	1.82	22.2
14:36:41	1179.46	1103.02	87.3648	589.727	502.359	87.3648	393.149	120.301	262.098	0.296478	0.233181	0.00022606	0.282123	0.248779	0.00673659	0.250475	0.578455	0.199792	0.296772	0.1407	TRUE	TRUE	TRUE	TRUE	581.26	660.3	6.74	6.12	6.36	2.84	1.11	48.06	18.25	5.83	1.82	22.2
14:36:42	1168.54	1092.1	87.3648	589.727	502.359	87.3648	393.149	131.222	262.098	0.296478	0.232842	0.000135636	0.282123	0.248779	0.00646532	0.251017	0.578048	0.199521	0.296681	0.141514	TRUE	TRUE	TRUE	TRUE	581.26	660.3	6.74	6.12	6.36	2.84	1.11	48.23	18.25	5.83	1.82	22.2
14:36:43	1179.46	1103.02	87.3648	578.806	502.359	87.3648	393.149	120.301	251.177	0.296252	0.232842	0.000316484	0.282462	0.249005	0.00673659	0.250972	0.578229	0.199385	0.296048	0.139796	TRUE	TRUE	TRUE	TRUE	581.29	660.3	6.74	6.12	6.36	2.84	1.11	48.23	18.25	5.9	1.82	22.2
14:36:44	1179.46	1103.02	87.3648	589.727	502.359	76.4441	393.149	131.222	262.098	0.296252	0.232955	0.000316484	0.282462	0.249118	0.00614884	0.250836	0.578138	0.198752	0.296094	0.141695	TRUE	TRUE	TRUE	TRUE	581.29	660.3	6.81	6.12	6.36	2.84	1.11	48.34	18.25	5.9	1.82	22.2
14:36:45	1168.54	1092.1	87.3648	589.727	502.359	87.3648	393.149	131.222	251.177	0.296365	0.232729	0.000135636	0.282236	0.248892	0.00632969	0.250927	0.578229	0.198345	0.295189	0.141333	TRUE	TRUE	TRUE	TRUE	574.15	660.3	6.81	6.12	6.36	2.84	1.11	48.34	18.25	5.9	1.82	22.2
14:36:46	1179.46	1103.02	87.3648	578.806	502.359	87.3648	393.149	120.301	262.098	0.296139	0.232842	0.000271272	0.282349	0.249118	0.00673659	0.250927	0.576963	0.1983	0.295958	0.141152	TRUE	TRUE	TRUE	TRUE	574.15	660.3	6.82	6.12	6.36	2.84	1.11	48.34	18.25	5.88	1.82	22.2
14:36:47	1179.46	1103.02	87.3648	589.727	502.359	76.4441	393.149	131.222	251.177	0.296139	0.232842	0	0.282236	0.248892	0.00678181	0.250701	0.578455	0.197577	0.296048	0.142508	TRUE	TRUE	TRUE	TRUE	570.44	660.3	6.82	6.12	6.36	2.84	1.11	48.34	18.25	5.88	1.82	22.2
14:36:48	1179.46	1103.02	87.3648	589.727	513.28	87.3648	393.149	109.38	262.098	0.297495	0.233859	0.000135636	0.282349	0.249005	0.00655575	0.251469	0.577415	0.197305	0.294963	0.142011	TRUE	TRUE	TRUE	TRUE	570.44	660.3	6.83	6.12	6.36	2.84	1.11	48.34	18.25	5.86	1.82	22.3
14:36:49	1179.46	1103.02	87.3648	578.806	502.359	87.3648	393.149	131.222	251.177	0.297156	0.233859	0.000271272	0.282349	0.249005	0.00700787	0.251741	0.577822	0.196718	0.294556	0.142734	TRUE	TRUE	TRUE	TRUE	565.42	660.3	6.83	6.12	6.36	2.84	1.11	48.34	18.25	5.86	1.82	22.4
14:36:50	1179.46	1103.02	87.3648	589.727	491.438	87.3648	404.07	120.301	262.098	0.296817	0.233181	4.52e-05	0.282123	0.248779	0.00642011	0.251696	0.57746	0.196401	0.294421	0.14296	TRUE	TRUE	TRUE	TRUE	565.42	660.3	6.84	6.12	6.36	2.84	1.12	48.34	18.25	5.86	1.82	22.4
14:36:51	1168.54	1092.1	87.3648	589.727	513.28	76.4441	393.149	131.222	251.177	0.296591	0.233294	9.04e-05	0.282123	0.248892	0.00655575	0.251424	0.577822	0.196039	0.294466	0.143096	TRUE	TRUE	TRUE	TRUE	565.42	660.3	6.84	6.12	6.36	2.84	1.12	48.34	18.25	5.86	1.8	22.4
14:36:52	1179.46	1103.02	87.3648	578.806	502.359	87.3648	393.149	131.222	262.098	0.296591	0.233181	9.04e-05	0.282236	0.249005	0.00691744	0.250882	0.577731	0.195226	0.294602	0.143503	TRUE	TRUE	TRUE	TRUE	565.42	660.3	6.84	6.12	6.36	2.84	1.12	48.34	18.25	5.86	1.8	22.4
14:36:53	1179.46	1103.02	87.3648	589.727	502.359	87.3648	393.149	120.301	262.098	0.296478	0.232955	0.000316484	0.282236	0.248892	0.00705308	0.251153	0.577641	0.195271	0.293833	0.143548	TRUE	TRUE	TRUE	TRUE	565.42	660.57	6.84	6.12	6.4	2.84	1.12	48.34	18.25	5.86	1.83	22.4
14:36:54	1179.46	1103.02	87.3648	578.806	502.359	76.4441	393.149	131.222	251.177	0.296591	0.232955	0.000180848	0.282349	0.249005	0.00660096	0.251017	0.577324	0.194593	0.293833	0.143367	TRUE	TRUE	TRUE	TRUE	565.42	660.57	6.84	6.13	6.4	2.84	1.12	48.34	18.25	5.86	1.83	22.4
14:36:55	1179.46	1092.1	87.3648	589.727	502.359	87.3648	393.149	120.301	262.098	0.296591	0.233068	4.52e-05	0.282349	0.249005	0.00605841	0.251379	0.57746	0.194231	0.293652	0.144407	TRUE	TRUE	TRUE	TRUE	565.42	660.57	6.84	6.13	6.39	2.84	1.12	48.34	18.25	5.86	1.8	22.4
14:36:56	1168.54	1103.02	87.3648	589.727	502.359	87.3648	393.149	131.222	251.177	0.296365	0.232842	0.000180848	0.282236	0.249005	0.00682702	0.251605	0.576963	0.193869	0.293065	0.144136	TRUE	TRUE	TRUE	TRUE	565.42	660.71	6.84	6.13	6.39	2.84	1.12	48.34	18.25	5.86	1.8	22.4
14:36:57	1179.46	1103.02	87.3648	578.806	502.359	76.4441	393.149	120.301	262.098	0.296252	0.232842	0.000180848	0.282236	0.249005	0.00687223	0.251469	0.577189	0.193327	0.293155	0.144407	TRUE	TRUE	TRUE	TRUE	565.42	660.71	6.84	6.13	6.39	2.84	1.12	48.34	18.25	5.86	1.83	22.4
14:36:58	1179.46	1103.02	87.3648	589.727	502.359	87.3648	393.149	131.222	251.177	0.296365	0.232842	9.04e-05	0.282236	0.249005	0.00646532	0.251153	0.577053	0.192965	0.292522	0.144317	TRUE	TRUE	TRUE	TRUE	565.42	660.94	6.84	6.13	6.39	2.84	1.12	49.02	18.25	5.86	1.83	22.4
14:36:59	1179.46	1092.1	87.3648	589.727	502.359	87.3648	393.149	120.301	262.098	0.296365	0.233068	-9.04e-05	0.282236	0.249005	0.00669138	0.251243	0.576782	0.192242	0.292477	0.145131	TRUE	TRUE	TRUE	TRUE	565.42	660.94	6.84	6.13	6.39	2.84	1.12	49.02	18.25	5.86	1.83	22.4
14:37:00	1179.46	1103.02	87.3648	578.806	502.359	87.3648	393.149	131.222	262.098	0.296478	0.233068	-4.52e-05	0.282123	0.248892	0.00642011	0.250791	0.577189	0.191925	0.291844	0.145266	TRUE	TRUE	TRUE	TRUE	565.42	661.18	6.84	6.13	6.39	2.84	1.12	49.19	18.25	5.86	1.83	22.4
14:37:01	1179.46	1103.02	87.3648	589.727	502.359	76.4441	393.149	120.301	251.177	0.297495	0.233746	-0.000180848	0.282123	0.249005	0.00655575	0.251063	0.576827	0.191292	0.291708	0.145086	TRUE	TRUE	TRUE	TRUE	565.42	661.18	6.84	6.13	6.39	2.84	1.12	49.19	18.25	5.86	1.83	22.4
14:37:02	1168.54	1103.02	87.3648	578.806	502.359	87.3648	393.149	131.222	262.098	0.297608	0.233859	4.52e-05	0.281897	0.248779	0.00651053	0.251153	0.577279	0.190524	0.291482	0.146713	TRUE	TRUE	TRUE	TRUE	565.42	661.18	6.84	6.13	6.39	2.84	1.12	49.25	18.25	5.87	1.83	22.4
14:37:03	1179.46	1103.02	87.3648	589.727	502.359	87.3648	393.149	120.301	251.177	0.297608	0.233972	0.000180848	0.28201	0.248892	0.00660096	0.250701	0.576872	0.190207	0.290894	0.146351	TRUE	TRUE	TRUE	TRUE	566.06	661.18	6.84	6.13	6.39	2.84	1.12	49.25	18.25	5.87	1.83	22.4
14:37:04	1179.46	1092.1	87.3648	578.806	502.359	76.4441	393.149	131.222	262.098	0.296252	0.232842	0.000180848	0.282123	0.248892	0.00660096	0.251379	0.576691	0.190614	0.290533	0.146171	TRUE	TRUE	TRUE	TRUE	566.06	661.18	6.91	6.13	6.39	2.83	1.12	49.31	18.25	5.91	1.83	22.4
14:37:05	1179.46	1103.02	87.3648	589.727	502.359	87.3648	393.149	131.222	251.177	0.295913	0.232729	0.000180848	0.28201	0.248779	0.00687223	0.250249	0.576601	0.189755	0.290623	0.146577	TRUE	TRUE	TRUE	TRUE	568.95	661.18	6.91	6.13	6.39	2.83	1.12	49.31	18.25	5.91	1.83	22.4
14:37:06	1179.46	1103.02	87.3648	578.806	502.359	87.3648	393.149	120.301	262.098	0.296026	0.232616	0	0.28201	0.248779	0.00700787	0.251922	0.576737	0.189348	0.28999	0.146216	TRUE	TRUE	TRUE	TRUE	568.95	661.18	6.91	6.13	6.39	2.83	1.12	49.31	18.25	5.88	1.83	22.4
14:37:07	1179.46	1103.02	87.3648	589.727	502.359	76.4441	393.149	131.222	251.177	0.296478	0.232955	0	0.28201	0.248666	0.00664617	0.251153	0.576556	0.189212	0.289945	0.147075	TRUE	TRUE	TRUE	TRUE	567.19	661.18	6.91	6.13	6.39	2.83	1.12	49.31	18.25	5.88	1.83	22.4
14:37:08	1168.54	1092.1	87.3648	589.727	502.359	87.3648	393.149	120.301	262.098	0.297043	0.233633	0.000135636	0.281897	0.248666	0.00678181	0.250565	0.576511	0.188353	0.289538	0.146894	TRUE	TRUE	TRUE	TRUE	567.19	661.18	6.91	6.13	6.39	2.83	1.13	49.31	18.25	5.9	1.83	22.4
14:37:09	1179.46	1103.02	87.3648	578.806	502.359	87.3648	393.149	131.222	251.177	0.296817	0.233181	0.000316484	0.28201	0.248666	0.00660096	0.250204	0.576691	0.188534	0.289583	0.14712	TRUE	TRUE	TRUE	TRUE	568.29	661.18	6.91	6.13	6.39	2.83	1.13	49.31	18.25	5.9	1.83	22.4
14:37:10	1179.46	1103.02	87.3648	589.727	502.359	76.4441	393.149	120.301	262.098	0.296817	0.233181	0.000316484	0.281784	0.248666	0.00655575	0.249842	0.576511	0.187992	0.288995	0.148341	TRUE	TRUE	TRUE	TRUE	568.29	661.18	6.91	6.13	6.39	2.83	1.13	49.31	18.25	5.9	1.83	22.4
14:37:11	1179.46	1103.02	87.3648	578.806	502.359	87.3648	404.07	131.222	262.098	0.296252	0.232955	0.000180848	0.281897	0.248666	0.00682702	0.250836	0.576511	0.187449	0.289131	0.148115	TRUE	TRUE	TRUE	TRUE	568.29	661.18	6.91	6.13	6.39	2.83	1.13	49.31	18.25	5.9	1.83	22.4
14:37:12	1179.46	1103.02	87.3648	589.727	502.359	87.3648	382.228	120.301	251.177	0.295913	0.232616	0.00022606	0.28201	0.248553	0.00646532	0.250204	0.57633	0.187223	0.28886	0.148748	TRUE	TRUE	TRUE	TRUE	568.29	661.18	6.91	6.13	6.39	2.83	1.13	49.31	18.25	5.9	1.83	22.4
14:37:13	1179.46	1092.1	87.3648	578.806	502.359	76.4441	393.149	131.222	262.098	0.296252	0.232616	0.00045212	0.281784	0.248666	0.00642011	0.250836	0.576375	0.186545	0.288408	0.148431	TRUE	TRUE	TRUE	TRUE	568.29	661.18	6.91	6.13	6.38	2.83	1.13	49.31	18.25	5.9	1.83	22.4
14:37:14	1168.54	1103.02	87.3648	578.806	502.359	87.3648	393.149	120.301	251.177	0.29693	0.233294	4.52e-05	0.28201	0.248553	0.00664617	0.250836	0.576239	0.186364	0.288091	0.148702	TRUE	TRUE	TRUE	TRUE	568.29	661.9	6.91	6.13	6.38	2.83	1.13	49.31	18.25	5.9	1.79	22.4
14:37:15	1179.46	1103.02	87.3648	578.806	502.359	87.3648	393.149	131.222	262.098	0.296817	0.233407	4.52e-05	0.281784	0.248553	0.00673659	0.250746	0.575878	0.186002	0.288091	0.148431	TRUE	TRUE	TRUE	TRUE	568.29	661.9	6.91	6.13	6.38	2.83	1.13	49.31	18.25	5.9	1.79	22.4
14:37:16	1179.46	1103.02	87.3648	589.727	502.359	87.3648	393.149	120.301	251.177	0.295913	0.232616	0.00022606	0.281671	0.248666	0.00664617	0.24939	0.575742	0.185053	0.287639	0.14816	TRUE	TRUE	TRUE	TRUE	568.29	661.89	6.91	6.13	6.38	2.83	1.13	49.31	18.25	5.9	1.81	22.4
14:37:17	1179.46	1092.1	87.3648	589.727	502.359	76.4441	393.149	131.222	262.098	0.296139	0.232616	4.52e-05	0.281784	0.24844	0.00628447	0.250249	0.576104	0.184465	0.287277	0.149697	TRUE	TRUE	TRUE	TRUE	568.29	661.89	6.91	6.12	6.38	2.83	1.13	49.31	18.25	5.9	1.81	22.4
14:37:18	1179.46	1103.02	87.3648	578.806	502.359	87.3648	393.149	120.301	251.177	0.296591	0.233181	4.52e-05	0.281671	0.248327	0.00660096	0.250746	0.575923	0.184149	0.287232	0.148838	TRUE	TRUE	TRUE	TRUE	568.29	661.87	6.91	6.12	6.38	2.83	1.13	50.06	18.25	5.9	1.82	22.4
14:37:19	1168.54	1103.02	87.3648	589.727	502.359	76.4441	393.149	131.222	262.098	0.295913	0.232729	0.00022606	0.281558	0.24844	0.00678181	0.251108	0.575923	0.183199	0.28687	0.150827	TRUE	TRUE	TRUE	TRUE	568.29	661.87	6.91	6.12	6.38	2.83	1.13	50.06	18.25	5.9	1.82	22.4
14:37:20	1179.46	1092.1	87.3648	578.806	502.359	87.3648	393.149	131.222	251.177	0.295574	0.232277	-4.52e-05	0.281784	0.248553	0.00660096	0.250791	0.575878	0.182973	0.286283	0.150646	TRUE	TRUE	TRUE	TRUE	568.29	661.69	6.91	6.12	6.38	2.83	1.13	50.14	18.25	5.9	1.82	22.4
14:37:21	1179.46	1103.02	87.3648	589.727	502.359	87.3648	393.149	120.301	262.098	0.295687	0.232503	-4.52e-05	0.281558	0.24844	0.00619405	0.250791	0.575742	0.181843	0.286102	0.149787	TRUE	TRUE	TRUE	TRUE	568.29	661.69	6.91	6.12	6.38	2.83	1.13	50.14	18.25	5.9	1.82	22.4
14:37:22	1168.54	1103.02	87.3648	578.806	502.359	76.4441	393.149	109.38	251.177	0.295461	0.232277	0.000180848	0.281671	0.248553	0.00614884	0.250836	0.575471	0.181391	0.286057	0.149923	TRUE	TRUE	TRUE	TRUE	568.29	661.69	6.91	6.12	6.38	2.83	1.13	50.29	18.25	5.91	1.82	22.4
14:37:23	1179.46	1092.1	87.3648	589.727	502.359	87.3648	393.149	120.301	262.098	0.296704	0.232842	9.04e-05	0.281671	0.248553	0.00632969	0.249887	0.575606	0.181029	0.285695	0.151325	TRUE	TRUE	TRUE	TRUE	568.29	661.69	6.91	6.12	6.38	2.83	1.13	50.29	18.25	5.91	1.82	22.4
14:37:24	1179.46	1103.02	87.3648	589.727	502.359	87.3648	393.149	131.222	262.098	0.296252	0.232842	9.04e-05	0.281671	0.248553	0.00664617	0.249977	0.575606	0.180215	0.285243	0.150646	TRUE	TRUE	TRUE	TRUE	564.41	661.69	6.98	6.12	6.38	2.83	1.13	50.32	18.25	5.89	1.82	22.4
14:37:25	1168.54	1103.02	87.3648	578.806	502.359	76.4441	393.149	120.301	251.177	0.296252	0.232955	0.000180848	0.282123	0.24844	0.00655575	0.250339	0.576058	0.179718	0.284791	0.147708	TRUE	TRUE	TRUE	TRUE	564.41	661.69	6.98	6.12	6.38	2.83	1.13	50.32	18.25	5.89	1.82	22.4
14:37:26	1179.46	1092.1	87.3648	589.727	502.359	87.3648	393.149	131.222	262.098	0.296252	0.232842	0	0.281784	0.248553	0.00646532	0.249842	0.577415	0.179853	0.285017	0.145266	TRUE	TRUE	TRUE	TRUE	568.02	661.69	6.98	6.12	6.38	2.83	1.13	50.32	18.25	5.88	1.82	22.4
14:37:27	1179.46	1103.02	87.3648	578.806	491.438	87.3648	393.149	120.301	251.177	0.2958	0.232503	0.000180848	0.281897	0.248553	0.00642011	0.250701	0.576691	0.179537	0.284565	0.143051	TRUE	TRUE	TRUE	TRUE	568.02	661.69	6.98	6.12	6.38	2.83	1.13	50.32	18.25	5.88	1.82	22.4
14:37:28	1168.54	1103.02	87.3648	589.727	502.359	76.4441	393.149	131.222	262.098	0.2958	0.232503	0	0.281671	0.24844	0.00628447	0.249887	0.578048	0.178768	0.284836	0.142327	TRUE	TRUE	TRUE	TRUE	564.83	661.69	7	6.12	6.38	2.83	1.11	50.32	18.25	5.89	1.82	22.4
14:37:29	1179.46	1092.1	87.3648	578.806	502.359	87.3648	393.149	120.301	251.177	0.295687	0.232503	0.000135636	0.281671	0.24844	0.00655575	0.251063	0.577415	0.178723	0.284203	0.140881	TRUE	TRUE	TRUE	TRUE	564.83	661.69	7	6.12	6.38	2.83	1.11	50.32	18.25	5.89	1.82	22.5
14:37:30	1179.46	1103.02	87.3648	589.727	502.359	87.3648	393.149	131.222	262.098	0.295687	0.232277	9.04e-05	0.281671	0.24844	0.00655575	0.250113	0.578274	0.178316	0.283932	0.140293	TRUE	TRUE	TRUE	TRUE	529.18	661.69	7	6.12	6.38	2.83	1.12	50.32	18.25	5.89	1.82	22.5
14:37:31	1168.54	1103.02	87.3648	578.806	502.359	76.4441	393.149	120.301	251.177	0.295461	0.23239	0.000180848	0.281558	0.248327	0.00660096	0.250204	0.580218	0.177864	0.283751	0.13957	TRUE	TRUE	TRUE	TRUE	529.18	661.69	7.01	6.12	6.38	2.83	1.12	50.32	18.25	5.89	1.82	22.5
14:37:32	1179.46	1092.1	87.3648	589.727	502.359	87.3648	393.149	120.301	262.098	0.295461	0.232164	4.52e-05	0.281671	0.24844	0.00623926	0.249977	0.579901	0.177548	0.283434	0.138213	TRUE	TRUE	TRUE	TRUE	529.18	661.69	7.01	6.12	6.38	2.83	1.12	50.32	18.25	5.89	1.83	22.5
14:37:33	1168.54	1103.02	87.3648	578.806	502.359	87.3648	393.149	131.222	251.177	0.296026	0.232503	0	0.281445	0.24844	0.00651053	0.249932	0.578816	0.177231	0.283208	0.137309	TRUE	TRUE	TRUE	TRUE	529.18	661.69	7.01	6.12	6.38	2.83	1.12	50.32	18.25	5.89	1.83	22.5
14:37:34	1179.46	1103.02	87.3648	589.727	502.359	87.3648	393.149	120.301	262.098	0.296252	0.232616	0.00022606	0.281671	0.248553	0.00732435	0.251153	0.579856	0.176598	0.282937	0.134009	TRUE	TRUE	TRUE	TRUE	529.18	659.64	7.01	6.12	6.38	2.83	1.12	50.32	18.25	5.89	1.8	22.4
14:37:35	1179.46	1092.1	87.3648	589.727	502.359	76.4441	393.149	131.222	251.177	0.296365	0.232842	0.00022606	0.281897	0.24844	0.00682702	0.250113	0.581891	0.176191	0.283073	0.133059	TRUE	TRUE	TRUE	TRUE	529.18	659.64	7.01	6.13	6.38	2.83	1.12	50.32	18.25	5.89	1.8	22.5
14:37:36	1179.46	1103.02	87.3648	578.806	502.359	87.3648	393.149	120.301	262.098	0.295913	0.232616	0.000271272	0.281671	0.248553	0.00655575	0.250475	0.582659	0.175784	0.281852	0.132788	TRUE	TRUE	TRUE	TRUE	529.18	659.45	7.01	6.13	6.38	2.83	1.12	50.32	18.25	5.89	1.79	22.4
14:37:37	1168.54	1103.02	87.3648	578.806	502.359	87.3648	393.149	131.222	262.098	0.295687	0.23239	0.000316484	0.281671	0.248553	0.00628447	0.250701	0.584377	0.175332	0.281626	0.133466	TRUE	TRUE	TRUE	TRUE	529.18	659.45	7.01	6.14	6.38	2.83	1.12	50.32	18.25	5.89	1.79	22.4
14:37:38	1179.46	1092.1	87.3648	589.727	502.359	76.4441	393.149	120.301	251.177	0.295687	0.232503	0.000316484	0.281784	0.248553	0.00646532	0.250836	0.582705	0.174744	0.280948	0.130663	TRUE	TRUE	TRUE	TRUE	529.18	660.74	7.01	6.14	6.38	2.83	1.12	50.97	18.25	5.89	1.8	22.3
14:37:39	1179.46	1092.1	87.3648	578.806	502.359	87.3648	393.149	131.222	262.098	0.295687	0.232503	9.04e-05	0.281558	0.248553	0.00632969	0.250294	0.584649	0.174247	0.281083	0.129849	TRUE	TRUE	TRUE	TRUE	529.18	660.74	7.01	6.13	6.38	2.83	1.12	50.97	18.25	5.89	1.8	22.2
14:37:40	1168.54	1103.02	87.3648	589.727	502.359	87.3648	393.149	120.301	251.177	0.295687	0.23239	0.00022606	0.281558	0.24844	0.00678181	0.249932	0.587814	0.173795	0.280767	0.128719	TRUE	TRUE	TRUE	TRUE	529.18	663.4	7.01	6.13	6.38	2.83	1.12	50.97	18.25	5.89	1.8	22.3
14:37:41	1179.46	1092.1	87.3648	578.806	502.359	76.4441	393.149	131.222	262.098	0.296252	0.232955	0.000361696	0.281558	0.248553	0.00687223	0.25061	0.585734	0.173162	0.28036	0.127272	TRUE	TRUE	TRUE	TRUE	529.18	663.4	7.01	6.14	6.38	2.83	1.12	51.04	18.25	5.89	1.8	22.4
14:37:42	1179.46	1103.02	87.3648	589.727	502.359	87.3648	393.149	120.301	251.177	0.295913	0.232729	0.00045212	0.281784	0.24844	0.0063749	0.25043	0.584377	0.173207	0.279908	0.127136	TRUE	TRUE	TRUE	TRUE	529.18	663.4	7.01	6.14	6.38	2.83	1.12	51.04	18.25	5.67	1.8	22.4
14:37:43	1179.46	1103.02	87.3648	578.806	502.359	87.3648	393.149	131.222	262.098	0.295687	0.232503	0.00022606	0.281671	0.24844	0.00623926	0.249887	0.584649	0.172529	0.279817	0.126187	TRUE	TRUE	TRUE	TRUE	529.18	663.4	7.01	6.14	6.38	2.83	1.12	51.09	18.25	5.67	1.8	22.4
14:37:44	1168.54	1092.1	87.3648	589.727	502.359	76.4441	393.149	120.301	262.098	0.295687	0.232503	0.00022606	0.281671	0.248553	0.00623926	0.249887	0.584604	0.171851	0.279501	0.124378	TRUE	TRUE	TRUE	TRUE	565.76	663.4	7.01	6.14	6.38	2.82	1.12	51.09	18.25	5.77	1.8	22.4
14:37:45	1179.46	1103.02	87.3648	578.806	502.359	87.3648	393.149	131.222	251.177	0.295574	0.232164	0.000135636	0.281671	0.24844	0.00655575	0.250249	0.58813	0.171625	0.279275	0.122886	TRUE	TRUE	TRUE	TRUE	565.76	663.4	7.06	6.14	6.38	2.82	1.12	51.3	18.25	5.77	1.8	22.4
14:37:46	1168.54	1092.1	87.3648	589.727	502.359	87.3648	393.149	120.301	262.098	0.296026	0.232503	0.000135636	0.281558	0.248666	0.00673659	0.250565	0.587949	0.171263	0.278506	0.122027	TRUE	TRUE	TRUE	TRUE	563.81	663.4	7.06	6.14	6.38	2.82	1.12	51.3	18.25	5.84	1.8	22.4
14:37:47	1179.46	1103.02	87.3648	589.727	491.438	76.4441	393.149	131.222	251.177	0.296139	0.232955	0.00022606	0.281671	0.248553	0.00651053	0.249571	0.587135	0.171399	0.278868	0.121033	TRUE	TRUE	TRUE	TRUE	563.81	663.4	7.06	6.14	6.38	2.82	1.12	51.3	18.25	5.84	1.8	22.5
14:37:48	1179.46	1103.02	87.3648	578.806	502.359	87.3648	393.149	120.301	262.098	0.295913	0.232729	0.000542545	0.281671	0.248553	0.00682702	0.251063	0.586819	0.17054	0.277783	0.120264	TRUE	TRUE	TRUE	TRUE	555.51	663.4	7.06	6.14	6.38	2.82	1.12	51.3	18.25	5.89	1.8	22.5
14:37:49	1168.54	1092.1	87.3648	589.727	502.359	87.3648	393.149	131.222	262.098	0.295574	0.232277	0.000316484	0.281671	0.24844	0.00623926	0.250113	0.590164	0.169862	0.277421	0.119676	TRUE	TRUE	TRUE	TRUE	555.51	663.4	7.07	6.14	6.38	2.82	1.12	51.3	18.25	5.89	1.8	22.5
14:37:50	1179.46	1103.02	87.3648	589.727	502.359	76.4441	393.149	120.301	251.177	0.295574	0.232503	0.000271272	0.281784	0.248553	0.00614884	0.250475	0.590074	0.169771	0.27724	0.117913	TRUE	TRUE	TRUE	TRUE	554.16	663.4	7.07	6.14	6.38	2.82	1.12	51.3	18.25	5.89	1.8	22.5
14:37:51	1179.46	1092.1	87.3648	578.806	502.359	87.3648	393.149	131.222	262.098	0.295687	0.232503	0.000361696	0.281784	0.248666	0.00691744	0.250158	0.59125	0.169364	0.276969	0.117461	TRUE	TRUE	TRUE	TRUE	554.16	663.4	7.08	6.14	6.38	2.82	1.13	51.3	18.25	5.89	1.8	22.5
14:37:52	1168.54	1103.02	87.3648	589.727	502.359	76.4441	393.149	120.301	251.177	0.295461	0.232277	0.000316484	0.281671	0.24844	0.00646532	0.250204	0.588627	0.168867	0.276743	0.116466	TRUE	TRUE	TRUE	TRUE	554.16	663.4	7.08	6.14	6.38	2.82	1.13	51.3	18.25	5.89	1.8	22.5
14:37:53	1179.46	1103.02	87.3648	578.806	502.359	87.3648	393.149	120.301	262.098	0.295235	0.232051	0.000361696	0.281671	0.24844	0.00682702	0.250113	0.5903	0.168596	0.276381	0.114929	TRUE	TRUE	TRUE	TRUE	554.16	663.4	7.08	6.14	6.38	2.82	1.13	51.3	18.25	5.89	1.8	22.5
14:37:54	1179.46	1092.1	87.3648	589.727	502.359	87.3648	393.149	131.222	251.177	0.295461	0.232277	0.000316484	0.281558	0.248327	0.0063749	0.25052	0.592018	0.168189	0.2762	0.114703	TRUE	TRUE	TRUE	TRUE	554.16	657.56	7.08	6.14	6.38	2.82	1.13	51.3	18.25	5.89	1.8	22.5
14:37:55	1168.54	1103.02	87.3648	578.806	502.359	76.4441	393.149	120.301	262.098	0.295461	0.23239	0.000316484	0.281784	0.24844	0.00664617	0.250068	0.592063	0.167511	0.275658	0.113347	TRUE	TRUE	TRUE	TRUE	554.16	657.56	7.08	6.15	6.38	2.82	1.13	51.3	18.25	5.89	1.8	22.5
14:37:56	1179.46	1103.02	87.3648	589.727	502.359	87.3648	393.149	131.222	251.177	0.295574	0.232616	0.000361696	0.281784	0.248553	0.00623926	0.251198	0.593917	0.167104	0.275974	0.1119	TRUE	TRUE	TRUE	TRUE	554.16	657.2	7.08	6.15	6.38	2.82	1.13	51.3	18.25	5.89	1.81	22.5
14:37:57	1179.46	1092.1	87.3648	578.806	502.359	87.3648	393.149	120.301	262.098	0.295574	0.232616	0.000271272	0.281671	0.24844	0.00574193	0.250339	0.595002	0.167149	0.275794	0.111583	TRUE	TRUE	TRUE	TRUE	554.16	657.2	7.08	6.15	6.38	2.82	1.13	51.3	18.25	5.89	1.81	22.5
14:37:58	1168.54	1103.02	87.3648	589.727	502.359	76.4441	393.149	131.222	251.177	0.295687	0.23239	0.000497333	0.281671	0.248553	0.00646532	0.25061	0.594957	0.166787	0.275432	0.110679	TRUE	TRUE	TRUE	TRUE	554.16	656.85	7.08	6.15	6.38	2.82	1.13	51.3	18.25	5.89	1.81	22.5
14:37:59	1179.46	1092.1	87.3648	578.806	502.359	87.3648	393.149	120.301	262.098	0.295461	0.23239	0.000406908	0.281784	0.248553	0.00623926	0.250204	0.592923	0.165928	0.27498	0.109684	TRUE	TRUE	TRUE	TRUE	554.16	656.85	7.08	6.15	6.38	2.82	1.13	52.59	18.25	5.89	1.81	22.5
14:38:00	1168.54	1103.02	87.3648	589.727	502.359	87.3648	393.149	131.222	262.098	0.295913	0.232277	0.000361696	0.281671	0.24844	0.00682702	0.250204	0.596811	0.165838	0.274301	0.107966	TRUE	TRUE	TRUE	TRUE	554.16	656.4	7.08	6.15	6.38	2.82	1.13	52.59	18.25	5.89	1.81	22.5
14:38:01	1179.46	1092.1	87.3648	589.727	502.359	76.4441	393.149	120.301	251.177	0.295574	0.232277	0.000361696	0.281671	0.248214	0.00642011	0.250475	0.59568	0.164753	0.274663	0.107333	TRUE	TRUE	TRUE	TRUE	554.16	656.4	7.08	6.15	6.38	2.82	1.13	52.56	18.25	5.89	1.81	22.5
14:38:02	1179.46	1103.02	87.3648	578.806	502.359	87.3648	393.149	131.222	262.098	0.295913	0.232616	0.000180848	0.281671	0.24844	0.00646532	0.250068	0.595952	0.164843	0.274166	0.106248	TRUE	TRUE	TRUE	TRUE	554.16	656.4	7.08	6.15	6.38	2.82	1.13	52.56	18.25	5.96	1.81	22.5
14:38:03	1179.46	1103.02	98.2856	589.727	502.359	87.3648	393.149	120.301	251.177	0.295574	0.23239	0.000180848	0.281558	0.248553	0.00669138	0.250113	0.59663	0.165024	0.273714	0.104756	TRUE	TRUE	TRUE	TRUE	554.16	656.4	7.08	6.15	6.38	2.82	1.13	52.85	18.25	5.96	1.81	22.5
14:38:04	1168.54	1103.02	87.3648	578.806	502.359	76.4441	393.149	131.222	262.098	0.295348	0.232164	0.000406908	0.281558	0.24844	0.00646532	0.250746	0.598122	0.163848	0.273352	0.104033	TRUE	TRUE	TRUE	TRUE	547.07	656.4	7.08	6.15	6.38	2.82	1.13	52.85	18.25	5.96	1.81	22.5
14:38:05	1179.46	1092.1	87.3648	589.727	502.359	87.3648	393.149	120.301	251.177	0.295461	0.23239	0.000406908	0.281671	0.24844	0.00664617	0.250068	0.602146	0.163487	0.273352	0.103716	TRUE	TRUE	TRUE	TRUE	547.07	656.4	7.11	6.15	6.38	2.82	1.13	52.98	18.25	5.96	1.81	22.5
14:38:06	1179.46	1103.02	87.3648	578.806	502.359	87.3648	393.149	120.301	262.098	0.295461	0.232503	0.000316484	0.281558	0.248553	0.00614884	0.250565	0.595364	0.16317	0.273126	0.10236	TRUE	TRUE	TRUE	TRUE	547.94	656.4	7.11	6.15	6.38	2.82	1.13	52.98	18.25	5.95	1.81	22.5
14:38:07	1168.54	1092.1	87.3648	589.727	502.359	76.4441	393.149	131.222	251.177	0.295461	0.232164	0.000406908	0.281784	0.248553	0.00687223	0.249751	0.599885	0.163306	0.272538	0.100732	TRUE	TRUE	TRUE	TRUE	547.94	656.4	7.11	6.15	6.38	2.82	1.13	52.98	18.25	5.95	1.81	22.5
14:38:08	1168.54	1103.02	87.3648	578.806	502.359	87.3648	393.149	131.222	262.098	0.295574	0.232503	0.000587757	0.281671	0.248327	0.00642011	0.250204	0.601015	0.162447	0.272131	0.0997378	TRUE	TRUE	TRUE	TRUE	543.19	656.4	7.11	6.15	6.38	2.82	1.13	52.98	18.25	5.95	1.81	22.5
14:38:09	1179.46	1092.1	87.3648	589.727	502.359	87.3648	393.149	120.301	251.177	0.2958	0.232616	0.000180848	0.281671	0.24844	0.00605841	0.250836	0.602507	0.162221	0.272357	0.0991048	TRUE	TRUE	TRUE	TRUE	543.19	656.4	7.12	6.15	6.38	2.82	1.12	52.98	18.25	5.95	1.81	22.5
14:38:10	1179.46	1103.02	87.3648	578.806	502.359	87.3648	393.149	120.301	262.098	0.2958	0.232503	0.000406908	0.281784	0.248553	0.00642011	0.250656	0.601558	0.162085	0.272222	0.0983814	TRUE	TRUE	TRUE	TRUE	536.61	656.4	7.12	6.15	6.38	2.81	1.12	52.98	18.25	5.95	1.81	22.5
14:38:11	1179.46	1103.02	87.3648	589.727	502.359	76.4441	393.149	131.222	262.098	0.295574	0.232277	0.000632969	0.281671	0.24844	0.00614884	0.249571	0.601015	0.161181	0.271589	0.0969798	TRUE	TRUE	TRUE	TRUE	536.61	656.4	7.13	6.15	6.38	2.81	1.13	52.98	18.25	5.95	1.81	22.5
14:38:12	1168.54	1092.1	87.3648	589.727	502.359	87.3648	393.149	120.301	251.177	0.295235	0.232051	0.000497333	0.281445	0.24844	0.00651053	0.25052	0.601332	0.161497	0.271634	0.0954878	TRUE	TRUE	TRUE	TRUE	536.61	656.4	7.13	6.15	6.38	2.81	1.13	52.98	18.25	5.95	1.85	22.5
14:38:13	1179.46	1103.02	87.3648	578.806	502.359	87.3648	393.149	131.222	262.098	0.295122	0.231599	0.000316484	0.281671	0.24844	0.00678181	0.250565	0.606351	0.160864	0.271408	0.0954878	TRUE	TRUE	TRUE	TRUE	536.61	656.4	7.13	6.15	6.38	2.81	1.13	52.98	18.25	5.95	1.85	22.5
14:38:14	1168.54	1092.1	87.3648	589.727	502.359	76.4441	393.149	120.301	251.177	0.294783	0.231938	0.00022606	0.281558	0.248327	0.00646532	0.251108	0.60418	0.160051	0.27082	0.0939054	TRUE	TRUE	TRUE	TRUE	536.61	653.77	7.13	6.15	6.41	2.81	1.13	52.98	18.25	5.95	1.85	22.5
14:38:15	1179.46	1103.02	87.3648	589.727	502.359	87.3648	393.149	131.222	262.098	0.295235	0.232051	0.000361696	0.281671	0.24844	0.00664617	0.250656	0.605582	0.159599	0.270594	0.0925038	TRUE	TRUE	TRUE	TRUE	536.61	653.77	7.13	6.16	6.41	2.81	1.13	52.98	18.25	5.95	1.85	22.5
14:38:16	1179.46	1092.1	87.3648	578.806	491.438	87.3648	393.149	120.301	251.177	0.2958	0.232616	0.000497333	0.281671	0.24844	0.00664617	0.250656	0.60513	0.15892	0.270458	0.0912379	TRUE	TRUE	TRUE	TRUE	536.61	653.19	7.13	6.16	6.4	2.81	1.13	52.98	18.25	5.95	1.83	22.5
14:38:17	1179.46	1103.02	87.3648	589.727	502.359	76.4441	393.149	131.222	262.098	0.295235	0.231938	0.000361696	0.281671	0.248553	0.00664617	0.250339	0.606034	0.158423	0.26978	0.091464	TRUE	TRUE	TRUE	TRUE	536.61	653.19	7.13	6.17	6.4	2.81	1.13	52.98	18.25	5.95	1.83	22.5
14:38:18	1168.54	1103.02	87.3648	578.806	502.359	87.3648	393.149	120.301	251.177	0.295235	0.232051	0.000723393	0.281671	0.248553	0.0060132	0.249887	0.606305	0.158559	0.26969	0.0885704	TRUE	TRUE	TRUE	TRUE	536.61	652.59	7.13	6.17	6.4	2.81	1.13	52.98	18.25	5.95	1.78	22.5
14:38:19	1179.46	1092.1	87.3648	589.727	502.359	87.3648	393.149	131.222	262.098	0.2958	0.232164	0.000361696	0.281671	0.24844	0.00632969	0.25052	0.603231	0.157926	0.269464	0.0882991	TRUE	TRUE	TRUE	TRUE	536.61	652.59	7.13	6.17	6.4	2.81	1.13	53.53	18.25	5.95	1.78	22.5
14:38:20	1179.46	1103.02	87.3648	578.806	502.359	76.4441	393.149	120.301	251.177	0.295122	0.232164	0.000497333	0.281784	0.248553	0.00632969	0.25061	0.610465	0.157745	0.269373	0.086355	TRUE	TRUE	TRUE	TRUE	536.61	652.1	7.13	6.17	6.4	2.81	1.13	53.53	18.25	5.95	1.78	22.5
14:38:21	1168.54	1103.02	87.3648	589.727	502.359	87.3648	393.149	131.222	262.098	0.295235	0.232051	0.00045212	0.281671	0.248553	0.0063749	0.250204	0.608521	0.157067	0.269012	0.0855864	TRUE	TRUE	TRUE	TRUE	536.61	652.1	7.13	6.16	6.4	2.81	1.13	53.6	18.25	5.95	1.78	22.5
14:38:22	1179.46	1092.1	87.3648	589.727	502.359	87.3648	393.149	120.301	262.098	0.295009	0.231825	0.000316484	0.281671	0.248666	0.00605841	0.249977	0.608385	0.156614	0.268379	0.0844109	TRUE	TRUE	TRUE	TRUE	536.61	652.1	7.13	6.16	6.4	2.81	1.13	53.6	18.25	5.93	1.78	22.5
14:38:23	1179.46	1103.02	87.3648	578.806	502.359	76.4441	393.149	131.222	251.177	0.295122	0.231938	0.00045212	0.281671	0.24844	0.00623926	0.250113	0.609063	0.156072	0.268334	0.0837779	TRUE	TRUE	TRUE	TRUE	536.61	652.1	7.13	6.16	6.4	2.81	1.13	53.78	18.25	5.93	1.78	22.5
14:38:24	1168.54	1092.1	87.3648	589.727	502.359	87.3648	393.149	109.38	262.098	0.296026	0.232729	0.000406908	0.281558	0.248553	0.00651053	0.250204	0.610646	0.156072	0.267791	0.0817434	TRUE	TRUE	TRUE	TRUE	536.52	652.1	7.13	6.16	6.4	2.81	1.13	53.78	18.25	5.93	1.78	22.5
14:38:25	1179.46	1103.02	98.2856	578.806	502.359	87.3648	393.149	120.301	251.177	0.296026	0.232616	0.000723393	0.281671	0.24844	0.00696265	0.250113	0.610374	0.15562	0.268062	0.081653	TRUE	TRUE	TRUE	TRUE	536.52	652.1	7.15	6.16	6.4	2.81	1.13	53.82	18.25	5.98	1.78	22.5
14:38:26	1179.46	1103.02	87.3648	578.806	502.359	76.4441	393.149	131.222	262.098	0.295461	0.232503	0.000497333	0.281671	0.24844	0.00664617	0.250023	0.612092	0.154987	0.26752	0.080387	TRUE	TRUE	TRUE	TRUE	537.32	652.1	7.15	6.16	6.4	2.81	1.13	53.82	18.25	5.98	1.78	22.5
14:38:27	1179.46	1092.1	87.3648	589.727	502.359	87.3648	393.149	120.301	251.177	0.295461	0.232051	0.000632969	0.281671	0.248553	0.00642011	0.250158	0.609018	0.154444	0.267203	0.0789402	TRUE	TRUE	TRUE	TRUE	537.32	652.1	7.15	6.16	6.4	2.81	1.13	53.82	18.25	5.99	1.78	22.5
14:38:28	1168.54	1103.02	87.3648	578.806	502.359	87.3648	393.149	131.222	262.098	0.295122	0.232051	0.000587757	0.281671	0.24844	0.00651053	0.250339	0.612499	0.154083	0.266796	0.0778551	TRUE	TRUE	TRUE	TRUE	539.65	652.1	7.15	6.16	6.4	2.81	1.13	53.82	18.25	5.99	1.78	22.5
14:38:29	1179.46	1092.1	87.3648	589.727	502.359	76.4441	382.228	120.301	251.177	0.295235	0.231938	0.000361696	0.281558	0.24844	0.0060132	0.250294	0.611957	0.153857	0.266796	0.0766796	TRUE	TRUE	TRUE	TRUE	539.65	652.1	7.15	6.16	6.4	2.81	1.12	53.82	18.25	5.99	1.78	22.5
14:38:30	1168.54	1103.02	87.3648	578.806	502.359	87.3648	404.07	131.222	262.098	0.295348	0.232277	0.000587757	0.281784	0.248666	0.00709829	0.250746	0.613087	0.153676	0.266435	0.075685	TRUE	TRUE	TRUE	TRUE	529.5	652.1	7.15	6.16	6.4	2.81	1.12	53.82	18.25	5.99	1.78	22.5
14:38:31	1179.46	1092.1	87.3648	589.727	502.359	87.3648	393.149	120.301	262.098	0.295687	0.23239	0.000542545	0.281671	0.24844	0.0063749	0.249525	0.615122	0.153676	0.266661	0.0744642	TRUE	TRUE	TRUE	TRUE	529.5	652.1	7.16	6.16	6.4	2.81	1.13	53.82	18.25	5.99	1.78	22.5
14:38:32	1179.46	1103.02	87.3648	578.806	491.438	76.4441	393.149	120.301	251.177	0.295574	0.23239	0.000587757	0.281784	0.248553	0.00605841	0.249887	0.611776	0.152817	0.266254	0.0737408	TRUE	TRUE	TRUE	TRUE	529.5	652.1	7.16	6.16	6.4	2.81	1.13	53.82	18.25	5.99	1.78	22.5
14:38:33	1179.46	1103.02	87.3648	589.727	502.359	87.3648	393.149	131.222	262.098	0.295461	0.232277	0.00045212	0.281784	0.248553	0.0063749	0.250746	0.616704	0.152229	0.265485	0.0730174	TRUE	TRUE	TRUE	TRUE	529.5	652.1	7.16	6.16	6.4	2.81	1.13	53.82	18.25	5.99	1.84	22.5
14:38:34	1168.54	1092.1	87.3648	589.727	502.359	87.3648	393.149	120.301	251.177	0.295122	0.231825	0.000587757	0.281671	0.248666	0.00619405	0.249435	0.619281	0.152184	0.265304	0.0722036	TRUE	TRUE	TRUE	TRUE	529.5	648.22	7.16	6.16	6.39	2.81	1.13	53.82	18.25	5.99	1.84	22.5
14:38:35	1179.46	1103.02	87.3648	589.727	502.359	76.4441	382.228	131.222	262.098	0.295009	0.231486	0.000632969	0.281784	0.248666	0.00664617	0.25061	0.615935	0.151867	0.26553	0.0709829	TRUE	TRUE	TRUE	TRUE	529.5	648.22	7.16	6.16	6.39	2.81	1.13	53.82	18.25	5.99	1.84	22.5
14:38:36	1179.46	1092.1	87.3648	578.806	502.359	87.3648	393.149	120.301	251.177	0.294896	0.231825	0.000723393	0.281897	0.248779	0.00614884	0.249887	0.616568	0.151053	0.264626	0.0697622	TRUE	TRUE	TRUE	TRUE	529.5	647.64	7.16	6.16	6.39	2.81	1.13	53.82	18.25	5.99	1.83	22.5
14:38:37	1168.54	1092.1	87.3648	589.727	502.359	87.3648	393.149	131.222	251.177	0.295122	0.231825	0.000678181	0.282236	0.24844	0.00651053	0.249797	0.618196	0.150918	0.264581	0.069084	TRUE	TRUE	TRUE	TRUE	529.5	647.64	7.16	6.17	6.39	2.81	1.13	53.82	18.25	5.99	1.83	22.5
14:38:38	1179.46	1103.02	87.3648	578.806	502.359	76.4441	393.149	120.301	262.098	0.295235	0.232051	0.000587757	0.281897	0.248779	0.00628447	0.249977	0.620231	0.150285	0.264445	0.067592	TRUE	TRUE	TRUE	TRUE	529.5	645.6	7.16	6.17	6.39	2.81	1.13	53.82	18.25	5.99	1.83	22.6
14:38:39	1168.54	1092.1	87.3648	589.727	502.359	87.3648	393.149	131.222	251.177	0.295009	0.231938	0.000813817	0.28201	0.248666	0.00619405	0.250927	0.617111	0.150014	0.264445	0.0665069	TRUE	TRUE	TRUE	TRUE	529.5	645.6	7.16	6.17	6.39	2.81	1.13	54.51	18.25	5.99	1.83	22.7
14:38:40	1179.46	1103.02	98.2856	578.806	502.359	87.3648	393.149	120.301	262.098	0.294896	0.231938	0.000497333	0.281897	0.248779	0.00669138	0.250158	0.619417	0.149471	0.263903	0.0664617	TRUE	TRUE	TRUE	TRUE	529.5	644.93	7.16	6.17	6.39	2.81	1.13	54.51	18.25	5.99	1.83	22.5
14:38:41	1168.54	1092.1	87.3648	589.727	502.359	76.4441	393.149	120.301	262.098	0.295009	0.231712	0.000632969	0.281897	0.248779	0.00628447	0.249164	0.620502	0.14929	0.264038	0.0646532	TRUE	TRUE	TRUE	TRUE	529.5	644.93	7.16	6.17	6.39	2.81	1.13	54.62	18.25	5.99	1.83	22.5
14:38:42	1179.46	1103.02	87.3648	589.727	502.359	87.3648	393.149	131.222	251.177	0.294896	0.231712	0.000406908	0.281784	0.248892	0.0063749	0.25052	0.620728	0.148702	0.26336	0.0639298	TRUE	TRUE	TRUE	TRUE	529.5	644.93	7.16	6.17	6.39	2.81	1.13	54.62	18.25	5.99	1.83	22.5
14:38:43	1179.46	1092.1	87.3648	578.806	502.359	87.3648	393.149	120.301	262.098	0.294783	0.231599	0.000542545	0.282123	0.248553	0.00628447	0.250023	0.621542	0.148115	0.263134	0.0634325	TRUE	TRUE	TRUE	TRUE	529.5	644.93	7.16	6.17	6.39	2.81	1.13	54.65	18.25	6	1.83	22.5
14:38:44	1168.54	1103.02	87.3648	589.727	502.359	76.4441	393.149	131.222	251.177	0.294783	0.231712	0.000678181	0.28201	0.248553	0.00632969	0.250475	0.620954	0.147663	0.262908	0.0617596	TRUE	TRUE	TRUE	TRUE	531.98	644.93	7.16	6.17	6.39	2.8	1.13	54.65	18.25	6	1.83	22.5
14:38:45	1179.46	1092.1	87.3648	578.806	502.359	87.3648	393.149	120.301	262.098	0.294556	0.231712	0.000587757	0.281784	0.248666	0.00651053	0.249797	0.624074	0.147663	0.262682	0.0606746	TRUE	TRUE	TRUE	TRUE	531.98	644.93	7.17	6.17	6.39	2.8	1.13	54.68	18.25	6.01	1.83	22.5
14:38:46	1168.54	1103.02	87.3648	589.727	502.359	87.3648	393.149	131.222	251.177	0.294896	0.231712	0.000949453	0.281784	0.248553	0.00610363	0.251379	0.623079	0.14712	0.262546	0.0596347	TRUE	TRUE	TRUE	TRUE	533.66	644.93	7.17	6.17	6.39	2.8	1.13	54.68	18.25	6.01	1.83	22.5
14:38:47	1179.46	1092.1	87.3648	578.806	502.359	76.4441	393.149	120.301	262.098	0.294896	0.231938	0.000587757	0.282123	0.248666	0.00655575	0.250249	0.623124	0.146758	0.262456	0.0587304	TRUE	TRUE	TRUE	TRUE	533.66	644.93	7.16	6.17	6.39	2.8	1.13	54.68	18.25	6.01	1.83	22.7
14:38:48	1168.54	1092.1	87.3648	589.727	502.359	87.3648	393.149	131.222	251.177	0.294783	0.231938	0.000723393	0.281897	0.248666	0.0060132	0.250023	0.623622	0.14599	0.262004	0.057781	TRUE	TRUE	TRUE	TRUE	525.59	644.93	7.16	6.17	6.39	2.8	1.13	54.68	18.25	6.01	1.83	22.7
14:38:49	1179.46	1103.02	87.3648	589.727	502.359	87.3648	393.149	120.301	262.098	0.294896	0.231825	0.000497333	0.281897	0.248779	0.00605841	0.249797	0.621994	0.145764	0.261461	0.0567863	TRUE	TRUE	TRUE	TRUE	525.59	644.93	7.16	6.17	6.39	2.8	1.13	54.68	18.25	6.02	1.83	22.5
14:38:50	1168.54	1092.1	87.3648	578.806	502.359	76.4441	393.149	131.222	251.177	0.295687	0.232164	0.000587757	0.281784	0.248666	0.00632969	0.250701	0.62543	0.145447	0.26128	0.0560629	TRUE	TRUE	TRUE	TRUE	537.07	644.93	7.16	6.17	6.39	2.8	1.13	54.68	18.25	6.02	1.83	22.5
14:38:51	1179.46	1103.02	87.3648	589.727	502.359	87.3648	393.149	120.301	262.098	0.295122	0.231825	0.000678181	0.281897	0.248553	0.00619405	0.249887	0.619371	0.144678	0.261145	0.0548422	TRUE	TRUE	TRUE	TRUE	537.07	644.93	7.16	6.17	6.39	2.8	1.14	54.68	18.25	6.02	1.83	22.5
14:38:52	1179.46	1092.1	98.2856	578.806	502.359	87.3648	393.149	120.301	262.098	0.294783	0.231938	0.000632969	0.281784	0.248779	0.00646532	0.250656	0.625792	0.144362	0.260964	0.0538928	TRUE	TRUE	TRUE	TRUE	537.07	644.93	7.16	6.17	6.39	2.8	1.14	54.68	18.25	6.02	1.83	22.5
14:38:53	1179.46	1103.02	87.3648	589.727	502.359	76.4441	393.149	120.301	251.177	0.294783	0.231712	0.000723393	0.28201	0.248666	0.00614884	0.250068	0.627012	0.143594	0.260693	0.0530337	TRUE	TRUE	TRUE	TRUE	537.07	644.93	7.16	6.17	6.39	2.8	1.14	54.68	18.25	6.02	1.84	22.7
14:38:54	1168.54	1092.1	87.3648	589.727	502.359	87.3648	393.149	131.222	251.177	0.295009	0.231712	0.000497333	0.282123	0.248779	0.00664617	0.250294	0.62656	0.143277	0.260512	0.0519486	TRUE	TRUE	TRUE	TRUE	537.07	639.63	7.16	6.17	6.46	2.8	1.14	54.68	18.25	6.02	1.84	22.7
14:38:55	1179.46	1103.02	87.3648	578.806	502.359	87.3648	393.149	120.301	262.098	0.294896	0.231825	0.000587757	0.28201	0.248666	0.00655575	0.250565	0.627329	0.143141	0.260331	0.0507731	TRUE	TRUE	TRUE	TRUE	537.07	639.63	7.16	6.17	6.46	2.8	1.14	54.68	18.25	6.02	1.85	22.7
14:38:56	1168.54	1092.1	87.3648	589.727	502.359	76.4441	393.149	131.222	251.177	0.294783	0.231712	0.000587757	0.281897	0.248553	0.00651053	0.249887	0.627419	0.142373	0.259653	0.0499141	TRUE	TRUE	TRUE	TRUE	537.07	638.88	7.16	6.17	6.46	2.8	1.14	54.68	18.25	6.02	1.85	22.7
14:38:57	1179.46	1103.02	87.3648	578.806	502.359	87.3648	393.149	120.301	262.098	0.294783	0.231486	0.000678181	0.281897	0.248666	0.00623926	0.250068	0.629906	0.142327	0.259879	0.0544353	TRUE	TRUE	TRUE	TRUE	537.07	638.88	7.16	6.18	6.46	2.8	1.14	54.68	18.25	6.02	1.85	22.7
14:38:58	1179.46	1092.1	87.3648	589.727	502.359	87.3648	393.149	131.222	251.177	0.294783	0.231938	0.000587757	0.28201	0.248666	0.00614884	0.25052	0.62977	0.142192	0.259608	0.0554752	TRUE	TRUE	TRUE	TRUE	537.07	638.26	7.16	6.18	6.46	2.8	1.14	54.68	18.25	6.02	1.85	22.7
14:38:59	1168.54	1103.02	87.3648	589.727	502.359	76.4441	393.149	120.301	262.098	0.294896	0.231825	0.000678181	0.281784	0.248779	0.00619405	0.251017	0.62968	0.141423	0.259155	0.0554752	TRUE	TRUE	TRUE	TRUE	537.07	638.26	7.16	6.17	6.46	2.8	1.14	55.17	18.25	6.02	1.85	22.7
14:39:00	1179.46	1092.1	87.3648	578.806	502.359	87.3648	393.149	120.301	251.177	0.294783	0.231712	0.000949453	0.282123	0.248779	0.00691744	0.249073	0.629409	0.141333	0.258748	0.0555204	TRUE	TRUE	TRUE	TRUE	537.07	637.57	7.16	6.17	6.46	2.8	1.14	55.17	18.25	6.02	1.85	22.7
14:39:01	1168.54	1103.02	87.3648	589.727	502.359	87.3648	393.149	131.222	262.098	0.294669	0.231712	0.000678181	0.282236	0.248779	0.00610363	0.250565	0.629454	0.14079	0.258568	0.056289	TRUE	TRUE	TRUE	TRUE	537.07	637.57	7.16	6.18	6.46	2.8	1.14	55.21	18.25	6.02	1.85	22.7
14:39:02	1179.46	1092.1	87.3648	589.727	502.359	76.4441	393.149	120.301	262.098	0.294896	0.231825	0.000904241	0.282123	0.248779	0.00619405	0.250113	0.629499	0.139886	0.258432	0.0566507	TRUE	TRUE	TRUE	TRUE	537.07	637.57	7.16	6.18	6.46	2.8	1.14	55.21	18.25	6.02	1.85	22.7
14:39:03	1179.46	1103.02	98.2856	578.806	502.359	87.3648	393.149	131.222	251.177	0.294896	0.231712	0.000768605	0.282236	0.248779	0.00632969	0.250158	0.629409	0.139841	0.257844	0.0567411	TRUE	TRUE	TRUE	TRUE	537.07	637.57	7.16	6.18	6.46	2.8	1.14	55.34	18.25	6.02	1.85	22.7
14:39:04	1168.54	1092.1	87.3648	589.727	491.438	87.3648	382.228	120.301	262.098	0.294783	0.231825	0.000813817	0.282123	0.248892	0.00628447	0.249887	0.629047	0.139253	0.257663	0.0568315	TRUE	TRUE	TRUE	TRUE	537.07	637.57	7.16	6.18	6.46	2.8	1.14	55.34	18.25	6.02	1.85	22.7
14:39:05	1179.46	1092.1	87.3648	578.806	502.359	76.4441	404.07	131.222	251.177	0.294896	0.231712	0.000768605	0.282123	0.248779	0.00655575	0.250746	0.629047	0.138937	0.257528	0.0572385	TRUE	TRUE	TRUE	TRUE	521.75	637.57	7.16	6.18	6.46	2.8	1.14	55.37	18.25	6.02	1.85	22.7
14:39:06	1168.54	1103.02	87.3648	589.727	502.359	87.3648	382.228	120.301	262.098	0.294783	0.231712	0.000632969	0.282236	0.248779	0.00646532	0.249977	0.629092	0.13862	0.257392	0.0573289	TRUE	TRUE	TRUE	TRUE	521.75	637.57	7.16	6.18	6.46	2.8	1.14	55.37	18.25	6.02	1.85	22.7
14:39:07	1179.46	1092.1	87.3648	589.727	502.359	87.3648	393.149	131.222	251.177	0.295348	0.231938	0.000678181	0.282123	0.248892	0.00651053	0.249887	0.629002	0.138123	0.25703	0.0571932	TRUE	TRUE	TRUE	TRUE	503.61	637.57	7.16	6.18	6.46	2.8	1.14	55.37	18.25	6.02	1.85	22.7
14:39:08	1168.54	1103.02	87.3648	578.806	502.359	76.4441	393.149	120.301	262.098	0.296026	0.232503	0.000678181	0.281671	0.248666	0.00628447	0.249842	0.628957	0.137806	0.256895	0.0574645	TRUE	TRUE	TRUE	TRUE	503.61	637.57	7.16	6.18	6.46	2.8	1.14	55.37	18.25	6.02	1.85	22.7
14:39:09	1179.46	1092.1	87.3648	589.727	502.359	87.3648	393.149	120.301	262.098	0.296252	0.232729	0.000678181	0.282123	0.248553	0.0060132	0.250249	0.62864	0.136857	0.256488	0.0578262	TRUE	TRUE	TRUE	TRUE	511.48	637.57	7.17	6.18	6.46	2.8	1.14	55.37	18.25	6.02	1.85	22.7
14:39:10	1179.46	1103.02	87.3648	578.806	502.359	87.3648	393.149	131.222	251.177	0.296139	0.232729	0.000768605	0.282123	0.248666	0.00614884	0.250204	0.62873	0.136224	0.256217	0.0581879	TRUE	TRUE	TRUE	TRUE	511.48	637.57	7.17	6.18	6.46	2.8	1.13	55.37	18.25	6.02	1.85	22.7
14:39:11	1179.46	1103.02	98.2856	589.727	502.359	87.3648	393.149	120.301	262.098	0.2958	0.232729	0.000723393	0.28201	0.248779	0.0063749	0.250791	0.62855	0.136359	0.25581	0.0581427	TRUE	TRUE	TRUE	TRUE	502.47	637.57	7.14	6.18	6.46	2.79	1.14	55.37	18.25	6.02	1.85	22.7
14:39:12	1179.46	1092.1	87.3648	589.727	502.359	76.4441	393.149	131.222	251.177	0.294783	0.231599	0.000768605	0.282123	0.248779	0.00614884	0.25043	0.62864	0.135365	0.2559	0.0585496	TRUE	TRUE	TRUE	TRUE	502.47	637.57	7.14	6.18	6.46	2.79	1.14	55.37	18.25	6.02	1.85	22.7
14:39:13	1179.46	1103.02	87.3648	578.806	502.359	87.3648	393.149	120.301	262.098	0.295009	0.231825	0.000678181	0.282123	0.248779	0.00610363	0.248802	0.628414	0.134732	0.255448	0.0590017	TRUE	TRUE	TRUE	TRUE	502.47	637.57	7.14	6.18	6.46	2.79	1.14	55.37	18.25	6.02	1.86	22.7
14:39:14	1168.54	1092.1	87.3648	589.727	502.359	87.3648	393.149	131.222	251.177	0.294896	0.231825	0.000723393	0.281897	0.248779	0.0063749	0.250475	0.628324	0.134551	0.255086	0.0590469	TRUE	TRUE	TRUE	TRUE	502.47	632.61	7.14	6.18	6.46	2.79	1.14	55.37	18.25	6.02	1.86	22.7
14:39:15	1179.46	1092.1	87.3648	589.727	502.359	76.4441	393.149	120.301	262.098	0.294669	0.231712	0.000678181	0.282123	0.248779	0.00619405	0.249842	0.628007	0.133737	0.254589	0.059499	TRUE	TRUE	TRUE	TRUE	502.47	632.61	7.14	6.18	6.46	2.79	1.14	55.37	18.25	6.02	1.85	22.7
14:39:16	1168.54	1103.02	87.3648	578.806	502.359	87.3648	393.149	131.222	251.177	0.294896	0.231486	0.000678181	0.281897	0.248892	0.00583235	0.249751	0.628233	0.132878	0.254634	0.0597251	TRUE	TRUE	TRUE	TRUE	502.47	631.85	7.14	6.18	6.46	2.79	1.14	55.37	18.25	6.02	1.85	22.7
14:39:17	1179.46	1092.1	87.3648	589.727	502.359	87.3648	393.149	120.301	262.098	0.294896	0.232051	0.000497333	0.28201	0.248666	0.00623926	0.250113	0.627555	0.132607	0.254182	0.059906	TRUE	TRUE	TRUE	TRUE	502.47	631.85	7.14	6.18	6.45	2.79	1.14	55.37	18.25	6.02	1.85	22.7
14:39:18	1179.46	1103.02	98.2856	589.727	502.359	76.4441	393.149	131.222	262.098	0.295348	0.232277	0.000632969	0.28201	0.248553	0.00578714	0.250565	0.627645	0.131974	0.253956	0.0600868	TRUE	TRUE	TRUE	TRUE	502.47	631.85	7.14	6.18	6.45	2.79	1.14	55.37	18.25	6.02	1.85	22.7
14:39:19	1179.46	1092.1	87.3648	578.806	502.359	87.3648	393.149	120.301	251.177	0.295574	0.232051	0.000587757	0.281671	0.248666	0.00642011	0.25052	0.6276	0.131341	0.253549	0.0603581	TRUE	TRUE	TRUE	TRUE	502.47	631.26	7.14	6.18	6.45	2.79	1.14	55.92	18.25	6.02	1.85	22.7
14:39:20	1168.54	1103.02	87.3648	589.727	502.359	87.3648	393.149	131.222	262.098	0.295348	0.232164	0.000723393	0.281784	0.248666	0.00655575	0.249525	0.627691	0.131386	0.253368	0.0604485	TRUE	TRUE	TRUE	TRUE	502.47	631.26	7.14	6.17	6.45	2.79	1.14	55.92	18.25	6.02	1.85	22.7
14:39:21	1179.46	1092.1	87.3648	589.727	502.359	76.4441	393.149	120.301	251.177	0.295913	0.232616	0.000723393	0.281784	0.248666	0.00632969	0.249073	0.6276	0.130663	0.252961	0.0605389	TRUE	TRUE	TRUE	TRUE	502.47	630.76	7.14	6.17	6.46	2.79	1.14	56.04	18.25	6.02	1.85	22.7
14:39:22	1179.46	1103.02	87.3648	578.806	502.359	87.3648	393.149	131.222	262.098	0.295009	0.231938	0.000632969	0.281897	0.248779	0.00646532	0.250701	0.627555	0.130527	0.252826	0.0610363	TRUE	TRUE	TRUE	TRUE	502.47	630.76	7.14	6.16	6.46	2.79	1.14	56.04	18.25	6.02	1.85	22.7
14:39:23	1179.46	1103.02	98.2856	589.727	502.359	87.3648	393.149	120.301	251.177	0.294556	0.231486	0.000542545	0.281671	0.248666	0.00619405	0.249977	0.627419	0.130165	0.252555	0.0610815	TRUE	TRUE	TRUE	TRUE	502.47	630.76	7.14	6.16	6.46	2.79	1.14	56.04	18.25	5.93	1.85	22.7
14:39:24	1168.54	1092.1	87.3648	578.806	502.359	76.4441	393.149	131.222	262.098	0.294669	0.231486	0.000587757	0.281897	0.248666	0.00623926	0.250113	0.627329	0.129759	0.252238	0.0612171	TRUE	TRUE	TRUE	TRUE	502.47	630.76	7.14	6.16	6.46	2.79	1.14	56.2	18.25	5.93	1.85	22.7
14:39:25	1179.46	1103.02	87.3648	589.727	502.359	87.3648	393.149	120.301	251.177	0.294669	0.231599	0.000678181	0.281897	0.248666	0.00628447	0.249616	0.627464	0.129171	0.252102	0.0617144	TRUE	TRUE	TRUE	TRUE	508.38	630.76	7.14	6.16	6.46	2.79	1.14	56.2	18.25	5.13	1.85	22.7
14:39:26	1168.54	1092.1	87.3648	578.806	502.359	87.3648	393.149	131.222	262.098	0.294556	0.231712	0.000723393	0.28201	0.248779	0.00628447	0.250475	0.627329	0.12899	0.251922	0.0619857	TRUE	TRUE	TRUE	TRUE	508.38	630.76	7.11	6.16	6.46	2.79	1.14	56.3	18.25	5.13	1.85	22.7
14:39:27	1179.46	1103.02	87.3648	589.727	502.359	76.4441	393.149	120.301	262.098	0.294556	0.231486	0.000542545	0.28201	0.248779	0.00614884	0.25052	0.627284	0.128538	0.251741	0.0625283	TRUE	TRUE	TRUE	TRUE	506.13	630.76	7.11	6.16	6.46	2.79	1.14	56.3	18.25	3.92	1.85	22.7
14:39:28	1179.46	1092.1	87.3648	578.806	502.359	87.3648	393.149	131.222	251.177	0.294896	0.231938	0.000678181	0.281671	0.248553	0.0060132	0.250475	0.627148	0.127995	0.251289	0.0627091	TRUE	TRUE	TRUE	TRUE	506.13	630.76	7.1	6.16	6.46	2.79	1.14	56.3	18.25	3.92	1.85	22.7
14:39:29	1179.46	1103.02	87.3648	589.727	502.359	87.3648	393.149	120.301	262.098	0.295122	0.231938	0.000723393	0.28201	0.248553	0.0063749	0.24948	0.626922	0.127634	0.250882	0.06289	TRUE	TRUE	TRUE	TRUE	503.46	630.76	7.1	6.16	6.46	2.79	1.14	56.3	18.25	2.83	1.85	22.7
14:39:30	1179.46	1092.1	98.2856	578.806	502.359	76.4441	393.149	131.222	251.177	0.295009	0.231712	0.000632969	0.281784	0.248666	0.00651053	0.25052	0.627058	0.127182	0.250791	0.0633421	TRUE	TRUE	TRUE	TRUE	503.46	630.76	7.1	6.16	6.46	2.79	1.14	56.3	18.25	2.83	1.85	22.7
14:39:31	1168.54	1103.02	87.3648	589.727	502.359	87.3648	393.149	120.301	262.098	0.2958	0.232616	0.000497333	0.281784	0.248666	0.00610363	0.24948	0.627058	0.12682	0.250565	0.0634325	TRUE	TRUE	TRUE	TRUE	504.9	630.76	7.1	6.16	6.46	2.79	1.14	56.3	18.25	2.83	1.85	22.7
14:39:32	1190.38	1092.1	87.3648	578.806	502.359	76.4441	393.149	131.222	251.177	0.295687	0.232842	0.000497333	0.28201	0.248666	0.00610363	0.250475	0.626922	0.126458	0.250339	0.0638394	TRUE	TRUE	TRUE	TRUE	504.9	630.76	7.1	6.16	6.46	2.79	1.14	56.3	18.25	2.83	1.85	22.7
14:39:33	1179.46	1103.02	87.3648	589.727	502.359	87.3648	393.149	120.301	262.098	0.2958	0.23239	0.000768605	0.281671	0.248666	0.00628447	0.248757	0.626831	0.126051	0.249842	0.0641107	TRUE	TRUE	TRUE	TRUE	504.9	630.76	7.1	6.16	6.46	2.79	1.14	56.3	18.25	2.83	1.84	22.7
14:39:34	1168.54	1092.1	87.3648	589.727	502.359	87.3648	393.149	120.301	251.177	0.295122	0.231938	0.000542545	0.281784	0.248779	0.00632969	0.249842	0.626877	0.125599	0.249797	0.0639298	TRUE	TRUE	TRUE	TRUE	504.9	630.76	7.1	6.16	6.46	2.79	1.14	56.3	18.25	2.83	1.84	22.7
14:39:35	1179.46	1103.02	98.2856	578.806	502.359	76.4441	393.149	131.222	262.098	0.296026	0.232616	0.000723393	0.282123	0.248666	0.00651053	0.25061	0.62656	0.124695	0.249842	0.0648341	TRUE	TRUE	TRUE	TRUE	504.9	625.52	7.1	6.16	6.47	2.79	1.14	56.3	18.25	2.83	1.85	22.7
14:39:36	1179.46	1092.1	87.3648	589.727	502.359	87.3648	393.149	120.301	251.177	0.295687	0.232616	0.000497333	0.282123	0.248779	0.00660096	0.25043	0.626425	0.124514	0.24948	0.064608	TRUE	TRUE	TRUE	TRUE	504.9	625.52	7.1	6.18	6.47	2.79	1.14	56.3	18.25	2.83	1.85	22.7
14:39:37	1168.54	1103.02	87.3648	589.727	502.359	87.3648	393.149	131.222	262.098	0.295461	0.232051	0.000497333	0.28201	0.248666	0.00614884	0.249616	0.62656	0.124062	0.249028	0.0649697	TRUE	TRUE	TRUE	TRUE	504.9	624.79	7.1	6.18	6.47	2.79	1.14	56.3	18.25	2.83	1.86	22.7
14:39:38	1179.46	1103.02	87.3648	578.806	502.359	76.4441	393.149	120.301	251.177	0.295235	0.231825	0.000678181	0.281671	0.248666	0.00623926	0.250249	0.626379	0.123519	0.248938	0.0654218	TRUE	TRUE	TRUE	TRUE	504.9	624.79	7.1	6.18	6.47	2.79	1.14	56.3	18.25	2.83	1.86	22.7
14:39:39	1179.46	1092.1	87.3648	589.727	502.359	87.3648	393.149	131.222	262.098	0.295009	0.231825	0.000497333	0.281784	0.248553	0.00610363	0.25043	0.626334	0.123384	0.248395	0.0654218	TRUE	TRUE	TRUE	TRUE	504.9	624.12	7.1	6.18	6.47	2.79	1.14	56.3	18.25	2.83	1.87	22.7
14:39:40	1168.54	1103.02	98.2856	578.806	502.359	87.3648	393.149	120.301	251.177	0.295235	0.231825	0.000859029	0.28201	0.248553	0.00646532	0.250701	0.626063	0.122931	0.248305	0.0657383	TRUE	TRUE	TRUE	TRUE	504.9	624.12	7.1	6.18	6.47	2.79	1.14	56.8	18.25	2.83	1.87	22.7
14:39:41	1179.46	1092.1	87.3648	589.727	502.359	76.4441	393.149	131.222	262.098	0.295009	0.232051	0.000768605	0.28201	0.248779	0.00614884	0.249706	0.626153	0.122525	0.247717	0.0659192	TRUE	TRUE	TRUE	TRUE	504.9	623.4	7.1	6.18	6.47	2.79	1.14	56.8	18.25	2.83	1.87	22.7
14:39:42	1179.46	1092.1	87.3648	589.727	502.359	87.3648	393.149	120.301	251.177	0.294783	0.231712	0.000587757	0.281784	0.248779	0.00614884	0.249977	0.626289	0.121756	0.247807	0.0661452	TRUE	TRUE	TRUE	TRUE	504.9	623.4	7.1	6.19	6.47	2.79	1.14	56.87	18.25	2.83	1.87	22.7
14:39:43	1179.46	1092.1	87.3648	578.806	502.359	87.3648	393.149	131.222	262.098	0.295574	0.232164	0.000859029	0.281897	0.248666	0.00596799	0.250068	0.626199	0.121575	0.247536	0.0662809	TRUE	TRUE	TRUE	TRUE	504.9	623.4	7.1	6.19	6.47	2.79	1.14	56.87	18.25	0	1.87	22.7
14:39:44	1168.54	1092.1	87.3648	589.727	491.438	76.4441	393.149	120.301	251.177	0.295913	0.232503	0.000587757	0.281671	0.248553	0.00628447	0.25043	0.625837	0.121078	0.24731	0.0665973	TRUE	TRUE	TRUE	TRUE	504.9	623.4	7.1	6.19	6.47	2.79	1.14	56.87	18.25	0	1.87	22.7
14:39:45	1190.38	1103.02	98.2856	578.806	502.359	87.3648	393.149	131.222	262.098	0.295913	0.23239	0.000542545	0.281671	0.248553	0.00592278	0.249706	0.625837	0.120852	0.247039	0.0668234	TRUE	TRUE	TRUE	TRUE	495.56	623.4	7.1	6.19	6.47	2.78	1.14	56.87	18.25	0	1.87	22.7
14:39:46	1168.54	1103.02	87.3648	589.727	502.359	87.3648	382.228	120.301	251.177	0.296026	0.232616	0.000904241	0.281784	0.248779	0.00628447	0.250249	0.625927	0.120309	0.246677	0.0671399	TRUE	TRUE	TRUE	TRUE	495.56	623.4	7.08	6.19	6.47	2.78	1.14	56.98	18.25	0	1.87	22.7
14:39:47	1179.46	1092.1	87.3648	578.806	502.359	87.3648	393.149	131.222	262.098	0.295913	0.23239	0.000497333	0.282123	0.248779	0.00632969	0.249797	0.625746	0.119948	0.246406	0.0675016	TRUE	TRUE	TRUE	TRUE	494.38	623.4	7.08	6.19	6.47	2.78	1.14	56.98	18.25	0	1.87	22.7
14:39:48	1179.46	1103.02	87.3648	589.727	513.28	76.4441	393.149	120.301	251.177	0.295913	0.232616	0.000678181	0.281784	0.248666	0.00623926	0.250565	0.625656	0.11936	0.246134	0.0676824	TRUE	TRUE	TRUE	TRUE	494.38	623.4	7.07	6.19	6.47	2.78	1.14	56.98	18.25	0	1.87	22.7
14:39:49	1179.46	1103.02	98.2856	589.727	491.438	87.3648	393.149	131.222	262.098	0.295348	0.23239	0.000271272	0.281897	0.248779	0.00614884	0.249842	0.625656	0.119043	0.245727	0.0678181	TRUE	TRUE	TRUE	TRUE	493.02	623.4	7.07	6.19	6.47	2.78	1.14	56.98	18.25	0	1.87	22.7
14:39:50	1179.46	1092.1	87.3648	578.806	502.359	87.3648	393.149	120.301	251.177	0.295009	0.232051	0.000859029	0.28201	0.248779	0.00646532	0.249299	0.62543	0.118636	0.245727	0.0683154	TRUE	TRUE	TRUE	TRUE	493.02	623.4	7.07	6.19	6.47	2.78	1.14	56.98	18.25	0	1.87	22.7
14:39:51	1168.54	1103.02	87.3648	589.727	502.359	76.4441	393.149	120.301	262.098	0.294669	0.231712	0.000542545	0.282123	0.248779	0.00628447	0.249887	0.62534	0.118365	0.245727	0.068225	TRUE	TRUE	TRUE	TRUE	493.79	623.4	7.07	6.19	6.47	2.78	1.14	56.98	18.25	0	1.87	22.7
14:39:52	1179.46	1092.1	87.3648	578.806	502.359	87.3648	393.149	120.301	251.177	0.294556	0.231599	0.000271272	0.281671	0.248666	0.00655575	0.249751	0.62534	0.117732	0.245592	0.0685415	TRUE	TRUE	TRUE	TRUE	493.79	623.4	7.07	6.19	6.47	2.78	1.15	56.98	18.25	0	1.87	22.7
14:39:53	1179.46	1103.02	87.3648	578.806	502.359	87.3648	393.149	131.222	262.098	0.294783	0.231599	0.000768605	0.281897	0.248779	0.00651053	0.249028	0.62534	0.117506	0.244959	0.0683154	TRUE	TRUE	TRUE	TRUE	493.79	623.4	7.07	6.19	6.47	2.78	1.15	56.98	18.25	0	1.89	22.7
14:39:54	1168.54	1092.1	87.3648	589.727	502.359	76.4441	393.149	120.301	251.177	0.294669	0.231599	0.000542545	0.28201	0.248892	0.00619405	0.249616	0.625294	0.11719	0.244642	0.0687223	TRUE	TRUE	TRUE	TRUE	493.79	623.4	7.07	6.19	6.47	2.78	1.14	56.98	18.25	0	1.89	22.7
14:39:55	1179.46	1103.02	98.2856	578.806	502.359	87.3648	393.149	131.222	262.098	0.294783	0.231825	0.000632969	0.282123	0.248779	0.0060132	0.24948	0.625249	0.116873	0.244461	0.069084	TRUE	TRUE	TRUE	TRUE	493.79	619.09	7.07	6.19	6.5	2.78	1.14	56.98	18.25	0	1.89	22.7
14:39:56	1179.46	1092.1	87.3648	589.727	502.359	87.3648	393.149	131.222	251.177	0.294896	0.231825	0.000542545	0.281897	0.248892	0.00623926	0.249706	0.625113	0.116511	0.244009	0.069084	TRUE	TRUE	TRUE	TRUE	493.79	619.09	7.07	6.2	6.5	2.78	1.15	56.98	18.25	0	1.89	22.7
14:39:57	1168.54	1103.02	87.3648	578.806	502.359	76.4441	393.149	120.301	262.098	0.294783	0.231712	0.000587757	0.28201	0.248779	0.00574193	0.249571	0.625113	0.11615	0.243693	0.0694457	TRUE	TRUE	TRUE	TRUE	493.79	618.26	7.07	6.2	6.5	2.78	1.15	56.98	18.25	0	1.89	22.7
14:39:58	1179.46	1092.1	87.3648	589.727	502.359	87.3648	393.149	131.222	251.177	0.294556	0.231712	0.000632969	0.281784	0.248666	0.00583235	0.249571	0.625927	0.115517	0.243602	0.0663261	TRUE	TRUE	TRUE	TRUE	493.79	618.26	7.07	6.2	6.5	2.78	1.15	56.98	18.25	0	1.89	22.7
14:39:59	1179.46	1103.02	87.3648	589.727	502.359	87.3648	393.149	120.301	262.098	0.294783	0.231712	0.000587757	0.281897	0.248666	0.00619405	0.249932	0.626922	0.11511	0.243467	0.0642463	TRUE	TRUE	TRUE	TRUE	493.79	617.6	7.07	6.2	6.5	2.78	1.15	56.98	18.25	0	1.9	22.7
14:40:00	1168.54	1092.1	98.2856	578.806	502.359	76.4441	393.149	131.222	251.177	0.294896	0.231599	0.000587757	0.281671	0.248779	0.00587757	0.25043	0.625882	0.114567	0.242789	0.062483	TRUE	TRUE	TRUE	TRUE	493.79	617.6	7.07	6.19	6.5	2.78	1.15	57.47	18.25	0	1.9	22.7
14:40:01	1179.46	1092.1	87.3648	589.727	502.359	87.3648	382.228	120.301	262.098	0.294669	0.231825	0.000632969	0.282123	0.248779	0.00664617	0.25043	0.627691	0.114341	0.242744	0.060991	TRUE	TRUE	TRUE	TRUE	493.79	616.84	7.07	6.19	6.5	2.78	1.15	57.47	18.25	0	1.9	22.7
14:40:02	1179.46	1103.02	87.3648	578.806	502.359	87.3648	393.149	131.222	251.177	0.294896	0.231825	0.000497333	0.281897	0.248666	0.00682702	0.250249	0.628957	0.113753	0.242698	0.0591826	TRUE	TRUE	TRUE	TRUE	493.79	616.84	7.07	6.19	6.5	2.78	1.15	57.52	18.25	0	1.9	22.7
14:40:03	1179.46	1103.02	87.3648	589.727	502.359	76.4441	393.149	131.222	262.098	0.294556	0.231599	0.000723393	0.282123	0.248666	0.00623926	0.250204	0.627374	0.113527	0.242246	0.0586852	TRUE	TRUE	TRUE	TRUE	493.79	616.84	7.07	6.19	6.5	2.78	1.15	57.52	18.25	0	1.9	22.8
14:40:04	1168.54	1092.1	87.3648	589.727	502.359	87.3648	393.149	120.301	251.177	0.295235	0.231938	0.000587757	0.281784	0.248779	0.0060132	0.249751	0.62864	0.11312	0.242156	0.058007	TRUE	TRUE	TRUE	TRUE	493.79	616.84	7.07	6.19	6.5	2.78	1.15	57.6	18.25	0	1.9	22.8
14:40:05	1179.46	1092.1	87.3648	578.806	502.359	87.3648	393.149	131.222	262.098	0.294896	0.231938	0.000723393	0.281784	0.248666	0.00632969	0.250068	0.629363	0.112623	0.24193	0.0566055	TRUE	TRUE	TRUE	TRUE	481.67	616.84	7.07	6.19	6.5	2.77	1.15	57.6	18.25	0	1.9	22.8
14:40:06	1179.46	1103.02	98.2856	589.727	502.359	76.4441	393.149	120.301	262.098	0.295235	0.232164	0.000678181	0.282123	0.248779	0.00623926	0.249299	0.628504	0.112397	0.241297	0.0556108	TRUE	TRUE	TRUE	TRUE	481.67	616.84	7.04	6.19	6.5	2.77	1.15	57.69	18.25	0	1.9	22.9
14:40:07	1179.46	1092.1	87.3648	578.806	502.359	87.3648	393.149	131.222	251.177	0.295009	0.231825	0.000768605	0.281897	0.248666	0.0060132	0.250249	0.628821	0.111855	0.241116	0.0548422	TRUE	TRUE	TRUE	TRUE	482.62	616.84	7.04	6.19	6.5	2.77	1.15	57.69	18.25	0	1.9	22.9
14:40:08	1179.46	1103.02	87.3648	589.727	502.359	87.3648	393.149	131.222	262.098	0.294783	0.231599	0.000949453	0.28201	0.248779	0.00583235	0.249751	0.629092	0.111493	0.240754	0.0539832	TRUE	TRUE	TRUE	TRUE	482.62	616.84	7.04	6.19	6.5	2.77	1.15	57.69	18.25	0	1.9	22.9
14:40:09	1168.54	1092.1	87.3648	589.727	502.359	76.4441	393.149	120.301	251.177	0.294669	0.231712	0.000768605	0.282123	0.248892	0.00605841	0.249435	0.633342	0.11095	0.240438	0.0529433	TRUE	TRUE	TRUE	TRUE	486.1	616.84	7.04	6.19	6.5	2.77	1.15	57.69	18.25	0	1.9	22.8
14:40:10	1179.46	1103.02	98.2856	578.806	502.359	87.3648	393.149	131.222	262.098	0.294556	0.231599	0.000632969	0.281897	0.248892	0.00660096	0.249435	0.632302	0.110272	0.240573	0.0519034	TRUE	TRUE	TRUE	TRUE	486.1	616.84	7.03	6.19	6.5	2.77	1.15	57.69	18.25	0	1.9	22.8
14:40:11	1168.54	1092.1	87.3648	589.727	502.359	87.3648	393.149	120.301	251.177	0.294669	0.231712	0.000678181	0.281897	0.248779	0.00578714	0.249118	0.632393	0.10991	0.240076	0.0505019	TRUE	TRUE	TRUE	TRUE	492.69	616.84	7.03	6.19	6.5	2.77	1.15	57.69	18.25	0	1.9	22.7
14:40:12	1179.46	1103.02	87.3648	578.806	502.359	76.4441	393.149	131.222	262.098	0.294783	0.231825	0.000723393	0.28201	0.248779	0.00605841	0.250113	0.630765	0.109232	0.239714	0.0541188	TRUE	TRUE	TRUE	TRUE	492.69	616.84	7.01	6.19	6.5	2.77	1.15	57.69	18.25	0	1.9	22.7
14:40:13	1179.46	1092.1	87.3648	589.727	502.359	87.3648	393.149	131.222	251.177	0.294556	0.231486	0.000632969	0.281784	0.248779	0.00623926	0.250204	0.633523	0.108961	0.239488	0.0557465	TRUE	TRUE	TRUE	TRUE	492.69	616.84	7.01	6.19	6.5	2.77	1.15	57.69	18.25	0	1.9	22.7
14:40:14	1179.46	1103.02	87.3648	578.806	502.359	87.3648	393.149	120.301	251.177	0.294783	0.231712	0.000632969	0.282123	0.248779	0.00623926	0.249525	0.633523	0.109006	0.239081	0.0561534	TRUE	TRUE	TRUE	TRUE	492.69	616.84	7.01	6.19	6.5	2.77	1.14	57.69	18.25	0	1.73	22.7
14:40:15	1168.54	1092.1	98.2856	589.727	502.359	76.4441	393.149	131.222	262.098	0.294556	0.231599	0.000632969	0.282123	0.248666	0.00610363	0.249797	0.633387	0.108102	0.2389	0.0563794	TRUE	TRUE	TRUE	TRUE	492.69	612.74	7.01	6.19	6.49	2.77	1.14	57.69	18.25	0	1.73	22.7
14:40:16	1179.46	1103.02	87.3648	589.727	502.359	87.3648	393.149	120.301	251.177	0.294443	0.231599	0.000542545	0.281897	0.248779	0.00583235	0.248983	0.633252	0.108147	0.238584	0.0564698	TRUE	TRUE	TRUE	TRUE	492.69	612.74	7.01	6.22	6.49	2.77	1.15	57.69	18.25	0	1.79	22.7
14:40:17	1179.46	1092.1	87.3648	578.806	502.359	87.3648	393.149	131.222	262.098	0.294669	0.231373	0.000587757	0.281784	0.248553	0.00614884	0.24948	0.633387	0.107379	0.237951	0.056922	TRUE	TRUE	TRUE	TRUE	492.69	611.96	7.01	6.22	6.49	2.77	1.15	57.69	18.25	0	1.79	22.7
14:40:18	1168.54	1092.1	87.3648	589.727	502.359	76.4441	382.228	131.222	262.098	0.294669	0.231486	0.000813817	0.281784	0.248779	0.00560629	0.249435	0.633206	0.107017	0.238267	0.0567863	TRUE	TRUE	TRUE	TRUE	492.69	611.96	7.01	6.22	6.49	2.77	1.15	57.69	18.25	0	1.83	22.7
14:40:19	1179.46	1103.02	98.2856	578.806	502.359	87.3648	393.149	120.301	251.177	0.294556	0.231712	0.000678181	0.282123	0.249005	0.00605841	0.249073	0.63298	0.106429	0.238087	0.0575549	TRUE	TRUE	TRUE	TRUE	492.69	611.24	7.01	6.22	6.49	2.77	1.15	57.69	18.25	0	1.83	22.7
14:40:20	1179.46	1092.1	87.3648	589.727	502.359	87.3648	393.149	131.222	262.098	0.294556	0.231599	0.000859029	0.282123	0.248779	0.00583235	0.250023	0.63289	0.106339	0.237544	0.057781	TRUE	TRUE	TRUE	TRUE	492.69	611.24	7.01	6.22	6.49	2.77	1.15	57.69	18.25	0	1.86	22.7
14:40:21	1179.46	1103.02	87.3648	589.727	502.359	76.4441	393.149	120.301	251.177	0.294669	0.231486	0.000768605	0.281784	0.248779	0.00610363	0.250204	0.633252	0.105841	0.237273	0.0578262	TRUE	TRUE	TRUE	TRUE	492.69	610.62	7.01	6.22	6.49	2.77	1.15	58.21	18.25	0	1.86	22.7
14:40:22	1168.54	1092.1	87.3648	578.806	502.359	87.3648	393.149	131.222	262.098	0.294783	0.231599	0.000542545	0.28201	0.248666	0.00565151	0.249616	0.633116	0.10557	0.236775	0.0581879	TRUE	TRUE	TRUE	TRUE	492.69	610.62	7.01	6.22	6.49	2.77	1.15	58.3	18.25	0	1.86	22.7
14:40:23	1179.46	1092.1	98.2856	589.727	502.359	87.3648	393.149	120.301	251.177	0.294669	0.231599	0.000723393	0.28201	0.248666	0.00655575	0.250339	0.633071	0.105163	0.237182	0.0583235	TRUE	TRUE	TRUE	TRUE	492.69	610.62	7.01	6.22	6.49	2.77	1.15	58.3	18.25	0	1.86	22.7
14:40:24	1179.46	1103.02	87.3648	578.806	502.359	76.4441	393.149	131.222	262.098	0.294556	0.231486	0.000904241	0.281784	0.248666	0.00596799	0.250113	0.63298	0.104621	0.23673	0.0583687	TRUE	TRUE	TRUE	TRUE	492.69	610.62	7.01	6.22	6.49	2.77	1.15	58.3	18.25	0	1.86	22.7
14:40:25	1168.54	1092.1	87.3648	589.727	502.359	87.3648	393.149	131.222	251.177	0.294556	0.23126	0.000678181	0.281784	0.248779	0.00651053	0.250836	0.63298	0.10444	0.236369	0.0588661	TRUE	TRUE	TRUE	TRUE	475.99	610.62	7.01	6.22	6.49	2.77	1.15	58.33	18.25	0	1.86	22.8
14:40:26	1179.46	1103.02	87.3648	589.727	502.359	87.3648	393.149	120.301	262.098	0.294443	0.231599	0.000361696	0.281784	0.248666	0.00628447	0.250113	0.632528	0.103988	0.235962	0.059273	TRUE	TRUE	TRUE	TRUE	475.99	610.62	7	6.22	6.49	2.77	1.15	58.35	18.25	0	1.86	22.9
14:40:27	1179.46	1092.1	98.2856	578.806	502.359	76.4441	393.149	131.222	251.177	0.294556	0.231712	0.000587757	0.281784	0.248553	0.00619405	0.250068	0.632438	0.103355	0.235826	0.0595443	TRUE	TRUE	TRUE	TRUE	475.99	610.62	7	6.22	6.49	2.77	1.15	58.35	18.25	0	1.86	22.8
14:40:28	1168.54	1092.1	87.3648	589.727	502.359	87.3648	393.149	120.301	262.098	0.294556	0.231486	0.000768605	0.28201	0.248666	0.00614884	0.249842	0.632438	0.103264	0.2356	0.0595895	TRUE	TRUE	TRUE	TRUE	481.34	610.62	6.98	6.22	6.49	2.76	1.15	58.35	18.25	0	1.86	22.9
14:40:29	1179.46	1103.02	87.3648	589.727	502.359	87.3648	393.149	131.222	251.177	0.294783	0.231599	0.000859029	0.28201	0.248666	0.0060132	0.249571	0.632483	0.102586	0.235555	0.0596347	TRUE	TRUE	TRUE	TRUE	481.26	610.62	6.98	6.22	6.49	2.76	1.15	58.35	18.25	0	1.86	22.9
14:40:30	1179.46	1092.1	87.3648	578.806	502.359	76.4441	393.149	131.222	262.098	0.295235	0.232164	0.000768605	0.281671	0.248666	0.00592278	0.250158	0.632212	0.102315	0.234831	0.0600416	TRUE	TRUE	TRUE	TRUE	481.26	610.62	6.97	6.22	6.49	2.76	1.14	58.35	18.25	0	1.86	22.9
14:40:31	1179.46	1103.02	98.2856	589.727	502.359	87.3648	393.149	120.301	262.098	0.294783	0.231599	0.000768605	0.281784	0.248666	0.00628447	0.249661	0.632302	0.102179	0.234017	0.0603129	TRUE	TRUE	TRUE	TRUE	481.26	610.62	6.97	6.22	6.49	2.76	1.14	58.35	18.25	0	1.86	22.7
14:40:32	1179.46	1092.1	87.3648	578.806	502.359	87.3648	393.149	131.222	251.177	0.295348	0.232051	0.000632969	0.28201	0.248779	0.00614884	0.249932	0.632302	0.101682	0.234153	0.0604937	TRUE	TRUE	TRUE	TRUE	480.43	610.62	6.96	6.22	6.49	2.76	1.14	58.35	18.25	0	1.86	22.7
14:40:33	1168.54	1092.1	87.3648	589.727	502.359	76.4441	393.149	120.301	262.098	0.295009	0.231938	0.000271272	0.282123	0.248779	0.00655575	0.250023	0.632031	0.100959	0.23447	0.0609458	TRUE	TRUE	TRUE	TRUE	480.43	610.62	6.96	6.22	6.49	2.76	1.14	58.35	18.25	0	1.86	22.7
14:40:34	1179.46	1103.02	98.2856	589.727	502.359	87.3648	393.149	131.222	251.177	0.295122	0.231712	0.000678181	0.282123	0.248892	0.00614884	0.250068	0.632076	0.100778	0.234153	0.0610363	TRUE	TRUE	TRUE	TRUE	480.43	610.62	6.96	6.22	6.49	2.76	1.15	58.35	18.25	0	1.85	22.7
14:40:35	1179.46	1092.1	87.3648	589.727	502.359	87.3648	393.149	120.301	262.098	0.294217	0.231599	0.000542545	0.281897	0.248779	0.00596799	0.250249	0.631624	0.100371	0.233068	0.0612623	TRUE	TRUE	TRUE	TRUE	480.43	606.17	6.96	6.22	6.5	2.76	1.15	58.35	18.25	0	1.85	22.7
14:40:36	1179.46	1103.02	87.3648	578.806	502.359	76.4441	393.149	131.222	251.177	0.294783	0.231599	0.000813817	0.20741	0.193394	0.00587757	0.250023	0.63176	0.100009	0.233113	0.0612623	TRUE	FALSE	TRUE	TRUE	480.43	606.17	6.96	6.24	6.5	2.76	1.15	58.35	18.25	0	1.9	22.7
14:40:37	1179.46	1092.1	87.3648	273.019	447.754	32.7614	393.149	131.222	262.098	0.294669	0.231712	0.000678181	0.0604711	0.0587757	0.0060132	0.250972	0.631941	0.100145	0.232661	0.0613527	TRUE	FALSE	TRUE	TRUE	480.43	605.4	6.96	6.24	6.5	2.76	1.15	58.35	18.25	0	1.9	22.7
14:40:38	1168.54	1092.1	98.2856	0	251.177	0	393.149	120.301	251.177	0.294669	0.231825	0.000768605	0.0252057	0.0241884	0.00578714	0.25052	0.631534	0.100416	0.231712	0.0622118	TRUE	FALSE	TRUE	TRUE	480.43	605.4	6.96	6.24	6.49	2.76	1.15	58.35	18.25	0	1.9	22.7
14:40:39	1179.46	1103.02	87.3648	0	152.889	0	393.149	131.222	262.098	0.294783	0.231599	0.000678181	0.0127724	0.0117551	0.00610363	0.250294	0.631579	0.100642	0.232661	0.0623926	TRUE	FALSE	TRUE	TRUE	480.43	604.62	6.96	6.24	6.49	2.76	1.15	58.35	18.25	0	1.9	22.7
14:40:40	1179.46	1092.1	87.3648	0	87.3648	0	382.228	120.301	262.098	0.295009	0.231825	0.000632969	0.00689484	0.00553848	0.00610363	0.249977	0.631534	0.100325	0.232119	0.0623926	TRUE	FALSE	TRUE	TRUE	480.43	604.62	6.96	6.24	6.49	2.76	1.15	58.86	18.25	0	1.87	22.7
14:40:41	1168.54	1103.02	87.3648	0	54.6027	0	393.149	131.222	251.177	0.294443	0.231486	0.000678181	0.00395605	0.0022606	0.00556108	0.250023	0.630584	0.100597	0.231621	0.06289	TRUE	FALSE	TRUE	TRUE	480.43	604.02	6.96	6.24	6.49	2.76	1.15	58.86	18.25	0	1.87	22.7
14:40:42	1179.46	1092.1	98.2856	0	0	0	393.149	131.222	262.098	0.294443	0.231486	0.000723393	0.00293878	0.0011303	0.00632969	0.249932	0.630629	0.100868	0.230762	0.0625735	TRUE	FALSE	TRUE	TRUE	480.43	604.02	6.96	6.24	6.49	2.76	1.15	58.92	18.25	0	1.87	22.7
14:40:43	1179.46	1103.02	87.3648	0	0	0	393.149	120.301	251.177	0.294556	0.231373	0.000406908	0.00259969	0.000565151	0.00569672	0.249887	0.630494	0.100913	0.230581	0.0633421	TRUE	FALSE	TRUE	TRUE	480.43	604.02	6.96	6.24	6.49	2.76	1.15	58.92	18.25	0	1.87	22.7
14:40:44	1168.54	1092.1	87.3648	0	0	0	393.149	131.222	262.098	0.294443	0.231599	0.000723393	0.00248666	0.00033909	0.00632969	0.249797	0.629906	0.100823	0.229542	0.0637942	TRUE	FALSE	TRUE	TRUE	480.43	604.02	6.96	6.24	6.49	2.76	1.15	58.97	18.25	0	1.87	22.7
14:40:45	1179.46	1092.1	98.2856	0	0	0	393.149	120.301	251.177	0.294669	0.231373	0.000587757	0.00248666	0.000565151	0.00583235	0.249977	0.62968	0.101049	0.22927	0.0630708	TRUE	FALSE	TRUE	TRUE	484.42	604.02	6.96	6.24	6.49	0	1.15	58.97	18.25	0	1.87	22.7
14:40:46	1179.46	1103.02	87.3648	0	0	0	393.149	131.222	251.177	0.294443	0.231486	0.000813817	0.00237363	0.00022606	0.00646532	0.249887	0.629725	0.101411	0.228954	0.063749	TRUE	FALSE	TRUE	TRUE	484.42	604.02	6.92	6.24	6.49	0	1.15	59.04	18.25	0	1.87	22.7
14:40:47	1168.54	1092.1	87.3648	0	0	0	393.149	131.222	262.098	0.294104	0.23126	0.000587757	0.0022606	0.00022606	0.00596799	0.250158	0.629183	0.101365	0.228909	0.0640655	TRUE	FALSE	TRUE	TRUE	485.95	604.02	6.92	6.24	6.49	0	1.15	59.04	18.25	0	1.87	22.7
14:40:48	1179.46	1103.02	87.3648	0	0	0	393.149	120.301	251.177	0.294443	0.231599	0.000904241	0.00214757	0.00022606	0.00610363	0.250384	0.628866	0.101275	0.22814	0.0644272	TRUE	FALSE	TRUE	TRUE	485.95	604.02	6.92	6.24	6.49	0	1.15	59.04	18.25	0	1.87	22.7
14:40:49	1179.46	1092.1	98.2856	0	0	0	393.149	120.301	262.098	0.294556	0.23126	0.000768605	0.00214757	0.00011303	0.00610363	0.250023	0.62873	0.10132	0.227643	0.0647889	TRUE	FALSE	TRUE	TRUE	485.84	604.02	6.92	6.24	6.49	0	1.15	59.04	18.25	0	1.87	22.7
14:40:50	1179.46	1103.02	87.3648	0	0	0	393.149	131.222	251.177	0.294443	0.231486	0.000723393	0.00214757	0.00011303	0.00569672	0.249571	0.628278	0.101365	0.227371	0.0648793	TRUE	FALSE	TRUE	TRUE	485.84	604.02	6.91	6.24	6.49	0	1.14	59.04	18.25	0	1.87	22.7
14:40:51	1168.54	1092.1	87.3648	0	0	0	393.149	131.222	262.098	0.294556	0.231486	0.000632969	0.00214757	0	0.00592278	0.250475	0.627962	0.101546	0.227145	0.0646984	TRUE	FALSE	TRUE	TRUE	479.76	604.02	6.91	6.24	6.49	0	1.14	59.04	18.25	0	1.87	22.7
14:40:52	1179.46	1092.1	98.2856	0	0	0	393.149	120.301	262.098	0.294556	0.231599	0.000678181	0.00214757	0.00022606	0.00569672	0.25052	0.627826	0.101727	0.227055	0.0653314	TRUE	FALSE	TRUE	TRUE	479.76	604.02	6.91	6.24	6.49	0	1.14	59.04	18.25	0	1.87	22.7
14:40:53	1179.46	1103.02	87.3648	0	0	0	393.149	131.222	251.177	0.294556	0.231373	0.000859029	0.00214757	0.00011303	0.00574193	0.250701	0.627871	0.101456	0.226512	0.0654218	TRUE	FALSE	TRUE	TRUE	479.76	604.02	6.91	6.24	6.49	0	1.14	59.04	18.25	0	1.87	22.7
14:40:54	1168.54	1092.1	87.3648	0	0	0	393.149	120.301	262.098	0.294443	0.231373	0.000768605	0.00203454	0.00011303	0.0060132	0.249751	0.627239	0.101818	0.226241	0.0656479	TRUE	FALSE	TRUE	TRUE	479.76	604.02	6.91	6.24	6.49	0	1.14	59.04	18.25	0	1.84	22.7
14:40:55	1179.46	1103.02	98.2856	0	0	0	382.228	131.222	251.177	0.295009	0.232051	0.000723393	0.00203454	0.00022606	0.00547066	0.249254	0.626967	0.101908	0.22597	0.0660548	TRUE	FALSE	TRUE	TRUE	479.76	604.02	6.91	6.24	6.49	0	1.15	59.04	18.25	0	1.84	22.7
14:40:56	1179.46	1092.1	87.3648	0	0	0	393.149	131.222	262.098	0.294669	0.231712	0.000904241	0.00214757	0.00022606	0.00596799	0.249751	0.626831	0.101818	0.225427	0.0663713	TRUE	FALSE	TRUE	TRUE	479.76	599.25	6.91	6.24	6.48	0	1.15	59.04	18.25	0	1.9	22.7
14:40:57	1179.46	1103.02	87.3648	0	0	0	393.149	120.301	251.177	0.294896	0.231938	0.000678181	0.00214757	0.00022606	0.00614884	0.249661	0.626651	0.101863	0.225066	0.0664617	TRUE	FALSE	TRUE	TRUE	479.76	598.5	6.91	6.24	6.48	0	1.15	59.04	18.25	0	1.9	22.7
14:40:58	1179.46	1092.1	98.2856	0	0	0	393.149	131.222	262.098	0.295009	0.231938	0.000587757	0.00214757	0.00022606	0.00605841	0.249299	0.62647	0.102089	0.224613	0.0667782	TRUE	FALSE	TRUE	TRUE	479.76	598.5	6.91	6.24	6.48	0	1.15	59.04	18.25	0	1.9	22.7
14:40:59	1179.46	1103.02	87.3648	0	0	0	393.149	120.301	262.098	0.294896	0.231938	0.000587757	0.0022606	0.00022606	0.00646532	0.250068	0.626334	0.102089	0.224252	0.0670947	TRUE	FALSE	TRUE	TRUE	479.76	597.69	6.91	6.24	6.48	0	1.15	59.04	18.25	0	1.9	22.7
14:41:00	1179.46	1092.1	87.3648	0	0	0	393.149	131.222	251.177	0.294443	0.231599	0.000497333	0.00248666	0.00022606	0.00628447	0.249797	0.626063	0.102405	0.223935	0.0671399	TRUE	FALSE	TRUE	TRUE	479.76	597.69	6.91	6.24	6.48	0	1.15	59.49	18.25	0	1.88	22.7
14:41:01	1168.54	1103.02	98.2856	0	0	0	393.149	131.222	262.098	0.294217	0.231486	0.000678181	0.00282575	0.0011303	0.00605841	0.249525	0.625656	0.102405	0.223754	0.0673659	TRUE	FALSE	TRUE	TRUE	479.76	597.14	6.91	6.24	6.48	0	1.15	59.49	18.25	0	1.88	22.7
14:41:02	1179.46	1092.1	87.3648	0	0	0	393.149	120.301	251.177	0.294443	0.231599	0.000723393	0.00395605	0.00237363	0.00592278	0.250113	0.62543	0.102767	0.223574	0.0676372	TRUE	FALSE	TRUE	TRUE	479.76	597.14	6.91	6.24	6.49	0	1.15	59.55	18.25	0	1.88	22.7
14:41:03	1179.46	1103.02	87.3648	0	0	0	393.149	131.222	262.098	0.294896	0.231938	0.000859029	0.00440817	0.0033909	0.00614884	0.24948	0.625204	0.10245	0.22276	0.0679085	TRUE	FALSE	TRUE	TRUE	479.76	597.14	6.91	6.24	6.49	0	1.15	59.55	18.25	0	1.88	22.7
14:41:04	1179.46	1092.1	98.2856	0	0	0	393.149	120.301	251.177	0.294443	0.231712	0.000768605	0.00508635	0.00474726	0.00614884	0.249706	0.625159	0.102541	0.222624	0.068225	TRUE	FALSE	TRUE	TRUE	479.76	597.14	6.91	6.24	6.49	0	1.15	59.62	18.25	0	1.88	22.8
14:41:05	1168.54	1092.1	87.3648	0	0	0	393.149	131.222	262.098	0.294669	0.231825	0.00045212	0.00632969	0.00655575	0.00583235	0.249344	0.624978	0.102812	0.222262	0.0686319	TRUE	FALSE	TRUE	TRUE	475.96	597.14	6.91	6.24	6.49	0	1.15	59.62	18.25	0	1.88	22.7
14:41:06	1179.46	1103.02	98.2856	0	0	0	393.149	131.222	251.177	0.294104	0.231373	0.000542545	0.00802514	0.00768605	0.00583235	0.250384	0.624707	0.102812	0.221901	0.068858	TRUE	FALSE	TRUE	TRUE	475.96	597.14	6.86	6.24	6.49	0	1.15	59.62	18.25	0	1.88	22.7
14:41:07	1179.46	1092.1	87.3648	0	0	0	393.149	120.301	262.098	0.294104	0.23126	0.000587757	0.00847726	0.0082512	0.00619405	0.250475	0.6243	0.103038	0.221403	0.069084	TRUE	FALSE	TRUE	TRUE	475.87	597.14	6.86	6.24	6.49	0	1.15	59.7	18.25	0	1.88	22.7
14:41:08	1179.46	1092.1	87.3648	0	0	0	393.149	131.222	251.177	0.294556	0.23126	0.000497333	0.00904241	0.00904241	0.00610363	0.249435	0.624164	0.103264	0.22077	0.0693101	TRUE	FALSE	TRUE	TRUE	475.87	597.14	6.85	6.24	6.49	0	1.15	59.7	18.25	0	1.88	22.7
14:41:09	1168.54	1103.02	87.3648	0	0	0	393.149	120.301	262.098	0.294217	0.231373	0.000949453	0.00892938	0.00904241	0.00587757	0.24948	0.624119	0.103219	0.22077	0.0692196	TRUE	FALSE	TRUE	TRUE	475.87	597.14	6.85	6.24	6.49	0	1.15	59.7	18.25	0	1.88	22.7
14:41:10	1179.46	1092.1	98.2856	0	0	0	382.228	131.222	262.098	0.294104	0.231599	0.000587757	0.00915544	0.00881635	0.00569672	0.249616	0.623712	0.103309	0.220273	0.0698526	TRUE	FALSE	TRUE	TRUE	480.86	597.14	6.85	6.24	6.49	0	1.15	59.7	18.25	0	1.88	22.7
14:41:11	1179.46	1092.1	87.3648	0	0	0	393.149	120.301	251.177	0.293878	0.23126	0.000678181	0.00915544	0.00904241	0.00605841	0.249344	0.623305	0.1034	0.219776	0.0698526	TRUE	FALSE	TRUE	TRUE	480.86	597.14	6.85	6.24	6.49	0	1.14	59.7	18.25	0	1.88	22.7
14:41:12	1168.54	1103.02	87.3648	0	0	0	393.149	131.222	262.098	0.293878	0.231147	0.000542545	0.00881635	0.00915544	0.0060132	0.250023	0.623169	0.103671	0.219278	0.069943	TRUE	FALSE	TRUE	TRUE	479.44	597.14	6.85	6.24	6.49	0	1.14	59.7	18.25	0	1.88	22.7
14:41:13	1179.46	1092.1	98.2856	0	0	0	393.149	120.301	251.177	0.294217	0.231486	0.000859029	0.00915544	0.00881635	0.00574193	0.250249	0.623079	0.103852	0.219188	0.0700334	TRUE	FALSE	TRUE	TRUE	479.44	597.14	6.85	6.24	6.49	0	1.15	59.7	18.25	0	1.88	22.7
14:41:14	1179.46	1092.1	87.3648	0	0	0	393.149	131.222	262.098	0.294443	0.231599	0.000542545	0.00892938	0.00904241	0.00610363	0.250339	0.622672	0.104078	0.218826	0.0700334	TRUE	FALSE	TRUE	TRUE	479.44	597.14	6.85	6.24	6.49	0	1.15	59.7	18.25	0	1.83	22.7
14:41:15	1179.46	1103.02	98.2856	0	0	0	393.149	120.301	251.177	0.294669	0.231599	0.000587757	0.00915544	0.00881635	0.00605841	0.249932	0.622536	0.104078	0.218465	0.0708021	TRUE	FALSE	TRUE	TRUE	479.44	597.14	6.85	6.24	6.49	0	1.15	59.7	18.25	0	1.83	22.7
14:41:16	1168.54	1092.1	87.3648	0	0	0	393.149	131.222	262.098	0.294104	0.231373	0.000587757	0.00915544	0.00904241	0.00587757	0.250565	0.62222	0.103942	0.218058	0.0708925	TRUE	FALSE	TRUE	TRUE	479.44	592.33	6.85	6.24	6.52	0	1.15	59.7	18.25	0	1.85	22.7
14:41:17	1179.46	1092.1	87.3648	0	0	0	393.149	131.222	251.177	0.293991	0.231373	0.000587757	0.00892938	0.00904241	0.00596799	0.249977	0.621949	0.104349	0.21756	0.0712542	TRUE	FALSE	TRUE	TRUE	479.44	592.33	6.85	6.24	6.52	0	1.15	59.7	18.25	0	1.85	22.7
14:41:18	1179.46	1103.02	98.2856	0	0	0	393.149	120.301	262.098	0.294104	0.231147	0.000678181	0.00904241	0.00892938	0.00614884	0.250249	0.621587	0.104349	0.217515	0.0712542	TRUE	FALSE	TRUE	TRUE	479.44	591.49	6.85	6.23	6.52	0	1.15	59.7	18.25	0	1.85	22.7
14:41:19	1179.46	1092.1	87.3648	0	0	0	393.149	131.222	251.177	0.294104	0.231034	0.00045212	0.00915544	0.00881635	0.00565151	0.24948	0.621406	0.104259	0.217153	0.0717515	TRUE	FALSE	TRUE	TRUE	479.44	591.49	6.85	6.23	6.52	0	1.15	59.7	18.25	0	1.85	22.7
14:41:20	1168.54	1103.02	87.3648	0	0	0	393.149	120.301	262.098	0.293991	0.231147	0.000632969	0.00915544	0.00881635	0.00592278	0.250068	0.621135	0.104847	0.216521	0.0719776	TRUE	FALSE	TRUE	TRUE	479.44	590.73	6.85	6.23	6.52	0	1.15	59.7	18.25	0	1.84	22.7
14:41:21	1179.46	1092.1	98.2856	0	0	0	382.228	131.222	251.177	0.294556	0.231373	0.000587757	0.00915544	0.00881635	0.00592278	0.250249	0.620592	0.104576	0.21634	0.0722036	TRUE	FALSE	TRUE	TRUE	479.44	590.73	6.85	6.23	6.52	0	1.15	60.09	18.25	0	1.84	22.7
14:41:22	1179.46	1092.1	87.3648	0	0	0	404.07	120.301	262.098	0.294556	0.231486	0.000723393	0.00915544	0.00892938	0.00578714	0.249073	0.620502	0.104711	0.215933	0.0723845	TRUE	FALSE	TRUE	TRUE	479.44	589.96	6.85	6.23	6.52	0	1.15	60.09	18.25	0	1.84	22.7
14:41:23	1168.54	1103.02	87.3648	0	0	0	382.228	131.222	251.177	0.29433	0.231599	0.000678181	0.00904241	0.00881635	0.00547066	0.25043	0.620366	0.104892	0.215707	0.072927	TRUE	FALSE	TRUE	TRUE	479.44	589.96	6.85	6.23	6.52	0	1.15	60.26	18.25	0	1.84	22.7
14:41:24	1179.46	1092.1	98.2856	0	0	0	393.149	131.222	262.098	0.294217	0.231373	0.000587757	0.00892938	0.00881635	0.00574193	0.250927	0.62005	0.104847	0.215164	0.0731079	TRUE	FALSE	TRUE	TRUE	479.44	589.96	6.85	6.23	6.52	0	1.15	60.26	18.25	0	1.84	22.7
14:41:25	1179.46	1092.1	87.3648	0	0	0	393.149	120.301	251.177	0.293991	0.23126	0.000406908	0.00904241	0.00881635	0.0060132	0.249932	0.619688	0.105344	0.215029	0.0728818	TRUE	FALSE	TRUE	TRUE	479.44	589.96	6.85	6.23	6.52	0	1.15	60.26	18.25	0	1.84	22.7
14:41:26	1179.46	1103.02	98.2856	0	0	0	393.149	131.222	262.098	0.294104	0.231147	0.000361696	0.00881635	0.00870332	0.00560629	0.249118	0.619598	0.105073	0.214531	0.0731531	TRUE	FALSE	TRUE	TRUE	477.78	589.96	6.85	6.23	6.52	0	1.15	60.26	18.25	0	1.84	22.7
14:41:27	1168.54	1092.1	87.3648	0	0	0	393.149	131.222	251.177	0.294104	0.231147	0.000542545	0.00892938	0.00870332	0.00605841	0.250565	0.619191	0.10548	0.214215	0.0731983	TRUE	FALSE	TRUE	TRUE	477.78	589.96	6.77	6.23	6.52	0	1.15	60.28	18.25	0	1.84	22.7
14:41:28	1179.46	1092.1	87.3648	0	0	0	393.149	120.301	262.098	0.294217	0.23126	0.000587757	0.00881635	0.00870332	0.00592278	0.249751	0.61901	0.10548	0.213853	0.0732887	TRUE	FALSE	TRUE	TRUE	476.51	589.96	6.77	6.23	6.52	0	1.15	60.28	18.25	0	1.84	22.7
14:41:29	1179.46	1103.02	98.2856	0	0	0	393.149	131.222	251.177	0.293991	0.23126	0.000497333	0.00870332	0.00847726	0.00556108	0.249525	0.618648	0.105525	0.213582	0.0741025	TRUE	FALSE	TRUE	TRUE	476.51	589.96	6.77	6.23	6.52	0	1.15	60.28	18.25	0	1.84	22.7
14:41:30	1168.54	1092.1	87.3648	0	0	0	393.149	120.301	262.098	0.293991	0.23126	0.000542545	0.00859029	0.0082512	0.00583235	0.249344	0.618332	0.105841	0.213356	0.0737408	TRUE	FALSE	TRUE	TRUE	473.09	589.96	6.77	6.23	6.52	0	1.15	60.28	18.25	0	1.84	22.7
14:41:31	1179.46	1103.02	98.2856	0	0	0	393.149	131.222	251.177	0.293878	0.231147	0.000316484	0.00847726	0.0082512	0.00605841	0.249842	0.618106	0.105887	0.212677	0.0743286	TRUE	FALSE	TRUE	TRUE	473.09	589.96	6.76	6.23	6.52	0	1.14	60.28	18.25	0	1.84	22.7
14:41:32	1179.46	1092.1	87.3648	0	0	0	393.149	120.301	262.098	0.294104	0.23126	0.000497333	0.0082512	0.00813817	0.00623926	0.25061	0.617653	0.106158	0.212451	0.0745547	TRUE	FALSE	TRUE	TRUE	480.41	589.96	6.76	6.23	6.52	0	1.14	60.28	18.25	0	1.84	22.7
14:41:33	1168.54	1092.1	87.3648	0	0	0	382.228	131.222	251.177	0.294104	0.23126	0.000406908	0.0082512	0.00802514	0.00596799	0.249842	0.617337	0.105932	0.212225	0.075278	TRUE	FALSE	TRUE	TRUE	480.41	589.96	6.76	6.23	6.52	0	1.15	60.28	18.25	0	1.84	22.7
14:41:34	1179.46	1103.02	98.2856	0	0	0	393.149	120.301	262.098	0.293878	0.23126	0.00045212	0.00813817	0.00779908	0.00623926	0.249977	0.617201	0.106113	0.211999	0.075278	TRUE	FALSE	TRUE	TRUE	480.41	589.96	6.76	6.23	6.52	0	1.15	60.28	18.25	0	1.91	22.7
14:41:35	1179.46	1092.1	87.3648	0	0	0	393.149	131.222	251.177	0.293991	0.23126	0.000678181	0.00802514	0.00768605	0.00556108	0.250204	0.61702	0.106293	0.211412	0.0755493	TRUE	FALSE	TRUE	TRUE	480.41	589.96	6.76	6.23	6.52	0	1.15	60.28	18.25	0	1.91	22.7
14:41:36	1179.46	1103.02	87.3648	0	0	0	393.149	131.222	262.098	0.293991	0.231147	0.000406908	0.00791211	0.00768605	0.00578714	0.249842	0.616523	0.106474	0.211276	0.0760919	TRUE	FALSE	TRUE	TRUE	480.41	584.37	6.76	6.23	0	0	1.15	60.28	18.25	0	1.9	22.7
14:41:37	1168.54	1092.1	98.2856	0	0	0	393.149	120.301	251.177	0.29433	0.23126	0.000497333	0.00768605	0.00757302	0.00596799	0.249661	0.616252	0.10652	0.210733	0.0760467	TRUE	FALSE	TRUE	TRUE	480.41	584.37	6.76	6.23	0	0	1.15	60.28	18.25	0	1.9	22.7
14:41:38	1179.46	1092.1	87.3648	0	0	0	393.149	131.222	262.098	0.293991	0.231034	0.000271272	0.00779908	0.00745999	0.0060132	0.249932	0.615845	0.1067	0.21001	0.0766796	TRUE	FALSE	TRUE	TRUE	480.41	583.5	6.76	6.23	0	0	1.15	60.28	18.25	0	1.89	22.7
14:41:39	1179.46	1103.02	98.2856	0	0	0	393.149	120.301	251.177	0.294217	0.23126	0.000497333	0.00779908	0.00745999	0.0060132	0.250204	0.615483	0.106836	0.209965	0.0764536	TRUE	FALSE	TRUE	TRUE	480.41	583.5	6.76	6.23	0	0	1.15	60.28	18.25	0	1.89	22.7
14:41:40	1168.54	1092.1	87.3648	0	0	0	393.149	131.222	262.098	0.293878	0.231034	0.000497333	0.00768605	0.00734696	0.00587757	0.250068	0.615212	0.106972	0.209694	0.0767248	TRUE	FALSE	TRUE	TRUE	480.41	582.79	6.76	6.23	0	0	1.15	60.28	18.25	0	1.89	22.7
14:41:41	1179.46	1103.02	87.3648	0	0	0	393.149	131.222	251.177	0.293878	0.231034	0.000678181	0.00768605	0.00723393	0.00614884	0.249842	0.614896	0.107062	0.209422	0.0765892	TRUE	FALSE	TRUE	TRUE	480.41	582.79	6.76	6.23	0	0	1.15	60.88	18.25	0	1.88	22.7
14:41:42	1179.46	1092.1	98.2856	0	0	0	393.149	120.301	262.098	0.294669	0.231373	0.000587757	0.00734696	0.00723393	0.00619405	0.250113	0.614534	0.107152	0.20897	0.0770865	TRUE	FALSE	TRUE	TRUE	480.41	582.09	6.76	6.23	0	0	1.15	60.88	18.25	0	1.88	22.7
14:41:43	1179.46	1092.1	87.3648	0	0	0	393.149	131.222	251.177	0.294669	0.231599	0.000497333	0.00723393	0.00700787	0.00551587	0.249661	0.614489	0.107288	0.208654	0.077403	TRUE	FALSE	TRUE	TRUE	480.41	582.09	6.76	6.23	0	0	1.15	60.85	18.25	0	1.88	22.7
14:41:44	1179.46	1103.02	98.2856	0	0	0	382.228	120.301	262.098	0.293878	0.231147	0.000497333	0.00723393	0.00689484	0.00551587	0.249209	0.613991	0.107379	0.208247	0.077403	TRUE	FALSE	TRUE	TRUE	480.41	582.09	6.76	6.23	0	0	1.15	60.85	18.25	0	1.88	22.7
14:41:45	1179.46	1092.1	87.3648	0	0	0	393.149	131.222	251.177	0.293991	0.23126	0.000542545	0.0071209	0.00678181	0.00610363	0.24948	0.61363	0.10765	0.20784	0.0779908	TRUE	FALSE	TRUE	TRUE	480.41	582.09	6.76	6.23	0	0	1.15	60.95	18.25	0	1.88	22.7
14:41:46	1168.54	1103.02	87.3648	0	0	0	393.149	131.222	262.098	0.293878	0.23126	0.000406908	0.0071209	0.00666878	0.00560629	0.249435	0.613178	0.107107	0.206483	0.0778099	TRUE	FALSE	TRUE	TRUE	482.44	582.09	6.76	6.23	0	0	1.15	60.95	18.25	0	1.88	22.7
14:41:47	1179.46	1092.1	98.2856	0	0	0	393.149	120.301	251.177	0.293878	0.23126	0.000406908	0.00689484	0.00644272	0.0060132	0.249797	0.613178	0.107786	0.207252	0.0777195	TRUE	FALSE	TRUE	TRUE	482.44	582.09	6.7	6.23	0	0	1.15	60.92	18.25	0	1.88	22.7
14:41:48	1179.46	1092.1	87.3648	0	0	0	393.149	131.222	262.098	0.293991	0.231147	0.000406908	0.00678181	0.00644272	0.00519938	0.249661	0.612545	0.10765	0.206574	0.078895	TRUE	FALSE	TRUE	TRUE	481.22	582.09	6.7	6.23	0	0	1.15	60.92	18.25	0	1.88	22.7
14:41:49	1179.46	1103.02	98.2856	0	0	0	393.149	120.301	262.098	0.293991	0.231147	0.000361696	0.00666878	0.00621666	0.00578714	0.250565	0.612545	0.108057	0.206212	0.078669	TRUE	FALSE	TRUE	TRUE	481.22	582.09	6.7	6.23	0	0	1.15	60.92	18.25	0	1.88	22.7
14:41:50	1168.54	1092.1	87.3648	0	0	0	393.149	131.222	251.177	0.293878	0.231147	0.000587757	0.00655575	0.00587757	0.0063749	0.249299	0.612138	0.108554	0.205986	0.0796184	TRUE	FALSE	TRUE	TRUE	480.32	582.09	6.7	6.23	0	0	1.15	60.92	18.25	0	1.88	22.7
14:41:51	1179.46	1092.1	98.2856	0	0	0	393.149	120.301	262.098	0.294104	0.23126	0.000497333	0.00655575	0.00610363	0.00519938	0.250158	0.611866	0.108238	0.20567	0.0797541	TRUE	FALSE	TRUE	TRUE	480.32	582.09	6.68	6.23	0	0	1.15	60.92	18.25	0	1.88	22.7
14:41:52	1179.46	1103.02	87.3648	0	0	0	393.149	131.222	251.177	0.293878	0.231147	0.000587757	0.00632969	0.00587757	0.00556108	0.249751	0.611595	0.108192	0.205037	0.0798897	TRUE	FALSE	TRUE	TRUE	480.65	582.09	6.68	6.23	0	0	1.15	60.92	18.25	0	1.88	22.7
14:41:53	1179.46	1092.1	87.3648	0	0	0	393.149	120.301	262.098	0.293765	0.231034	0.000497333	0.00632969	0.00576454	0.00542545	0.249977	0.611369	0.108238	0.20472	0.0797993	TRUE	FALSE	TRUE	TRUE	480.65	582.09	6.68	6.23	0	0	1.15	60.92	18.25	0	1.88	22.7
14:41:54	1179.46	1092.1	98.2856	0	0	0	393.149	131.222	251.177	0.293991	0.231147	0.000542545	0.00632969	0.00565151	0.00533502	0.249209	0.610872	0.108599	0.204358	0.0801157	TRUE	FALSE	TRUE	TRUE	480.65	582.09	6.68	6.23	0	0	1.15	60.92	18.25	0	1.88	22.7
14:41:55	1168.54	1103.02	87.3648	0	0	0	393.149	120.301	262.098	0.293991	0.23126	0.00045212	0.00621666	0.00542545	0.00614884	0.249571	0.610736	0.108419	0.204223	0.0806583	TRUE	FALSE	TRUE	TRUE	480.65	582.09	6.68	6.23	0	0	1.15	60.92	18.25	0	1.9	22.7
14:41:56	1179.46	1092.1	98.2856	0	0	0	393.149	131.222	251.177	0.295122	0.231825	0.000406908	0.00610363	0.00542545	0.00587757	0.249073	0.610148	0.10869	0.203816	0.0806583	TRUE	FALSE	TRUE	TRUE	480.65	576.31	6.68	6.23	0	0	1.15	60.92	18.25	0	1.9	22.7
14:41:57	1179.46	1092.1	87.3648	0	0	0	393.149	120.301	262.098	0.294217	0.231373	0.000859029	0.00610363	0.00531242	0.00614884	0.249797	0.610148	0.109413	0.20368	0.0806131	TRUE	FALSE	TRUE	TRUE	480.65	576.31	6.68	6.23	0	0	1.14	60.92	18.25	0	1.9	22.7
14:41:58	1179.46	1103.02	98.2856	0	0	0	393.149	131.222	251.177	0.293878	0.231147	0.000497333	0.00587757	0.00531242	0.00560629	0.249842	0.609922	0.109097	0.203228	0.0812008	TRUE	FALSE	TRUE	TRUE	480.65	575.43	6.68	6.23	0	0	1.14	60.92	18.25	0	1.9	22.7
14:41:59	1179.46	1092.1	87.3648	0	0	0	382.228	131.222	262.098	0.29433	0.231147	0.00045212	0.00576454	0.00519938	0.00569672	0.249661	0.60956	0.109187	0.20255	0.0816077	TRUE	FALSE	TRUE	TRUE	480.65	575.43	6.68	6.23	0	0	1.14	60.92	18.25	0	1.88	22.7
14:42:00	1179.46	1103.02	98.2856	0	0	0	393.149	120.301	251.177	0.293878	0.231034	0.00045212	0.00576454	0.00519938	0.00497332	0.250656	0.609289	0.109323	0.202414	0.0819694	TRUE	FALSE	TRUE	TRUE	480.65	574.52	6.68	6.23	0	0	1.14	60.92	18.25	0	1.88	22.7
14:42:01	1168.54	1092.1	87.3648	0	0	0	393.149	131.222	262.098	0.294217	0.231373	0.00045212	0.00565151	0.00508635	0.00565151	0.249118	0.608927	0.109413	0.201872	0.0821051	TRUE	FALSE	TRUE	TRUE	480.65	574.52	6.68	6.23	0	0	1.14	61.34	18.25	0	1.87	22.7
14:42:02	1179.46	1103.02	98.2856	0	0	0	393.149	120.301	262.098	0.294104	0.23126	0.000632969	0.00542545	0.00486029	0.00578714	0.249887	0.608702	0.109639	0.2016	0.0816077	TRUE	FALSE	TRUE	TRUE	480.65	573.7	6.68	6.23	0	0	1.14	61.34	18.25	0	1.87	22.7
14:42:03	1179.46	1092.1	87.3648	0	0	0	393.149	131.222	251.177	0.293991	0.23126	0.000723393	0.00531242	0.00486029	0.00592278	0.249842	0.608385	0.10982	0.201194	0.0821051	TRUE	FALSE	TRUE	TRUE	480.65	573.7	6.68	6.23	0	0	1.14	61.42	18.25	0	1.87	22.7
14:42:04	1168.54	1092.1	87.3648	0	0	0	393.149	120.301	262.098	0.293878	0.230921	0.000497333	0.00542545	0.00474726	0.00642011	0.250158	0.608204	0.109684	0.200967	0.0822407	TRUE	FALSE	TRUE	TRUE	480.65	573.7	6.68	6.23	0	0	1.14	61.42	18.25	0	1.87	22.7
14:42:05	1179.46	1103.02	98.2856	0	0	0	393.149	131.222	251.177	0.293878	0.231486	0.000587757	0.00531242	0.00486029	0.00592278	0.249118	0.607752	0.10973	0.200696	0.0831449	TRUE	FALSE	TRUE	TRUE	480.65	573.7	6.68	6.23	0	0	1.14	61.54	18.25	0	1.87	22.7
14:42:06	1179.46	1092.1	87.3648	0	0	0	393.149	120.301	262.098	0.293765	0.231147	0.000361696	0.00519938	0.00474726	0.00569672	0.250656	0.607616	0.110136	0.200108	0.0836875	TRUE	FALSE	TRUE	TRUE	473.8	573.7	6.68	6.23	0	0	1.14	61.54	18.25	0	1.87	22.7
14:42:07	1179.46	1092.1	98.2856	0	0	0	393.149	131.222	251.177	0.293765	0.231034	0.000406908	0.00531242	0.00463423	0.00592278	0.25043	0.6073	0.10991	0.199973	0.0829189	TRUE	FALSE	TRUE	TRUE	473.8	573.7	6.63	6.23	0	0	1.14	61.64	18.25	0	1.87	22.7
14:42:08	1168.54	1092.1	87.3648	0	0	0	393.149	131.222	262.098	0.293652	0.230921	0.00022606	0.00519938	0.00452121	0.00565151	0.249616	0.607074	0.110453	0.199837	0.0837327	TRUE	FALSE	TRUE	TRUE	476.15	573.7	6.63	6.23	0	0	1.14	61.64	18.25	0	1.87	22.7
14:42:09	1179.46	1103.02	98.2856	0	0	0	393.149	120.301	251.177	0.293539	0.230694	0.000542545	0.00519938	0.00440817	0.00596799	0.249887	0.606712	0.110363	0.199204	0.0830997	TRUE	FALSE	TRUE	TRUE	476.15	573.7	6.62	6.23	0	0	1.14	61.64	18.25	0	1.87	22.7
14:42:10	1179.46	1092.1	87.3648	0	0	0	393.149	131.222	262.098	0.293652	0.230921	0.000406908	0.00508635	0.00440817	0.00592278	0.250701	0.606577	0.110453	0.198662	0.0836875	TRUE	FALSE	TRUE	TRUE	476.14	573.7	6.62	6.23	0	0	1.14	61.64	18.25	0	1.87	22.7
14:42:11	1168.54	1092.1	98.2856	0	0	0	382.228	120.301	251.177	0.293878	0.230581	0.000406908	0.00497332	0.00429514	0.00565151	0.249525	0.606396	0.11086	0.198617	0.0847274	TRUE	FALSE	TRUE	TRUE	476.14	573.7	6.61	6.23	0	0	1.14	61.64	18.25	0	1.87	22.7
14:42:12	1179.46	1103.02	87.3648	0	0	0	393.149	131.222	262.098	0.293652	0.230921	0.000271272	0.00497332	0.00418211	0.00610363	0.250294	0.605898	0.11077	0.197984	0.0840492	TRUE	FALSE	TRUE	TRUE	473.17	573.7	6.61	6.23	0	0	1.14	61.64	18.25	0	1.87	22.7
14:42:13	1179.46	1092.1	98.2856	0	0	0	393.149	120.301	262.098	0.293878	0.230921	0.00022606	0.00508635	0.00406908	0.00538023	0.249751	0.605537	0.110996	0.198029	0.0859933	TRUE	FALSE	TRUE	TRUE	473.17	573.7	6.6	6.23	0	0	1.14	61.64	18.25	0	1.87	22.7
14:42:14	1168.54	1092.1	87.3648	0	0	0	393.149	120.301	251.177	0.293765	0.230581	0.00045212	0.00497332	0.00429514	0.00596799	0.250158	0.605175	0.111131	0.197622	0.0854055	TRUE	FALSE	TRUE	TRUE	473.17	573.7	6.6	6.23	0	0	1.14	61.64	18.25	0	1.87	22.7
14:42:15	1179.46	1103.02	87.3648	0	0	0	393.149	131.222	262.098	0.293652	0.230807	0.000587757	0.00486029	0.00418211	0.00596799	0.249616	0.605039	0.11095	0.196989	0.0849986	TRUE	FALSE	TRUE	TRUE	473.17	573.7	6.6	6.23	0	0	1.14	61.64	18.25	0	1.9	22.7
14:42:16	1179.46	1092.1	98.2856	0	0	0	393.149	120.301	251.177	0.293991	0.23126	0.000587757	0.00486029	0.00418211	0.00565151	0.250249	0.604678	0.111312	0.196808	0.0867167	TRUE	FALSE	TRUE	TRUE	473.17	567.83	6.6	6.23	0	0	1.14	61.64	18.25	0	1.9	22.7
14:42:17	1179.46	1092.1	87.3648	0	0	0	393.149	131.222	262.098	0.293765	0.231147	0.000316484	0.00474726	0.00406908	0.00551587	0.249751	0.604271	0.111222	0.196492	0.0859933	TRUE	FALSE	TRUE	TRUE	473.17	567.83	6.6	6.23	0	0	1.14	61.64	18.25	0	1.9	22.7
14:42:18	1168.54	1092.1	98.2856	0	0	0	393.149	120.301	251.177	0.293765	0.230921	0.000497333	0.00474726	0.00395605	0.00551587	0.249344	0.60418	0.111448	0.196311	0.086988	TRUE	FALSE	TRUE	TRUE	473.17	566.85	6.6	6.23	0	0	1.14	61.64	18.25	0	1.9	22.7
14:42:19	1179.46	1092.1	87.3648	0	0	0	393.149	131.222	262.098	0.29433	0.23126	0.000316484	0.00463423	0.00384302	0.00551587	0.249254	0.603728	0.111764	0.195497	0.0865811	TRUE	FALSE	TRUE	TRUE	473.17	566.85	6.6	6.24	0	0	1.14	61.64	18.25	0	1.9	22.7
14:42:20	1179.46	1103.02	98.2856	0	0	0	393.149	120.301	251.177	0.294783	0.231712	0.000135636	0.00474726	0.00395605	0.00592278	0.249706	0.603592	0.111855	0.195361	0.0870784	TRUE	FALSE	TRUE	TRUE	473.17	565.96	6.6	6.24	0	0	1.14	61.64	18.25	0	1.9	22.7
14:42:21	1179.46	1092.1	87.3648	0	0	0	393.149	131.222	262.098	0.293878	0.231034	0.000361696	0.00452121	0.00395605	0.00556108	0.249164	0.60296	0.1119	0.195045	0.0867619	TRUE	FALSE	TRUE	TRUE	473.17	565.96	6.6	6.23	0	0	1.14	61.96	18.25	0	1.89	22.7
14:42:22	1168.54	1092.1	98.2856	0	0	0	382.228	120.301	251.177	0.293539	0.230807	0.000180848	0.00463423	0.00384302	0.00596799	0.249435	0.602779	0.112081	0.194547	0.0878922	TRUE	FALSE	TRUE	TRUE	473.17	565.16	6.6	6.23	0	0	1.14	61.96	18.25	0	1.89	22.7
14:42:23	1179.46	1103.02	87.3648	0	0	0	393.149	131.222	262.098	0.293765	0.231147	0.000361696	0.00452121	0.00372999	0.00556108	0.249571	0.602553	0.111945	0.193824	0.0883443	TRUE	FALSE	TRUE	TRUE	473.17	565.16	6.6	6.24	0	0	1.14	62.12	18.25	0	1.89	22.7
14:42:24	1179.46	1092.1	98.2856	0	0	0	393.149	120.301	251.177	0.293652	0.231034	0.00022606	0.00452121	0.00372999	0.00569672	0.248847	0.602191	0.112262	0.193327	0.0882087	TRUE	FALSE	TRUE	TRUE	473.17	565.16	6.6	6.24	0	0	1.14	62.12	18.25	0	1.89	22.7
14:42:25	1168.54	1092.1	87.3648	0	0	0	393.149	131.222	262.098	0.293652	0.231034	0.000361696	0.00452121	0.00361696	0.00519938	0.249028	0.601829	0.112442	0.193236	0.0892938	TRUE	FALSE	TRUE	TRUE	473.17	565.16	6.6	6.24	0	0	1.14	62.23	18.25	0	1.89	22.7
14:42:26	1179.46	1092.1	98.2856	0	0	0	393.149	120.301	251.177	0.293878	0.230581	0.000632969	0.00452121	0.00361696	0.00542545	0.249616	0.601468	0.112442	0.193327	0.0890677	TRUE	FALSE	TRUE	TRUE	476.97	565.16	6.6	6.24	0	0	1.14	62.23	18.25	0	1.89	22.7
14:42:27	1179.46	1103.02	87.3648	0	0	0	393.149	120.301	262.098	0.294443	0.231147	0.000271272	0.00452121	0.00361696	0.00583235	0.250068	0.601377	0.112849	0.192242	0.0891582	TRUE	FALSE	TRUE	TRUE	476.97	565.16	6.54	6.24	0	0	1.14	62.27	18.25	0	1.89	22.7
14:42:28	1179.46	1092.1	98.2856	0	0	0	393.149	131.222	251.177	0.293878	0.231147	0.000361696	0.00452121	0.00361696	0.00569672	0.249842	0.60097	0.112804	0.192016	0.0899268	TRUE	FALSE	TRUE	TRUE	474.69	565.16	6.54	6.24	0	0	1.14	62.27	18.25	0	1.89	22.7
14:42:29	1168.54	1103.02	87.3648	0	0	0	393.149	131.222	262.098	0.294443	0.231147	0.000316484	0.00440817	0.0033909	0.00551587	0.248892	0.600608	0.11303	0.19197	0.0897007	TRUE	FALSE	TRUE	TRUE	474.69	565.16	6.53	6.24	0	0	1.14	62.27	18.25	0	1.89	22.7
14:42:30	1179.46	1092.1	98.2856	0	0	0	393.149	120.301	251.177	0.293878	0.231034	0.000361696	0.00440817	0.00350393	0.00515417	0.249571	0.600608	0.112488	0.191292	0.0887512	TRUE	FALSE	TRUE	TRUE	471.99	565.16	6.53	6.24	0	0	1.14	62.27	18.25	0	1.89	22.7
14:42:31	1179.46	1092.1	87.3648	0	0	0	393.149	131.222	262.098	0.294556	0.231599	0.000316484	0.00429514	0.00350393	0.00556108	0.248847	0.600383	0.11312	0.190976	0.0906501	TRUE	FALSE	TRUE	TRUE	471.99	565.16	6.53	6.24	0	0	1.14	62.27	18.25	0	1.89	22.7
14:42:32	1179.46	1103.02	98.2856	0	0	0	393.149	120.301	251.177	0.294669	0.231486	0.000542545	0.00429514	0.0033909	0.00538023	0.249435	0.59975	0.113211	0.190704	0.0909666	TRUE	FALSE	TRUE	TRUE	470.54	565.16	6.53	6.24	0	0	1.14	62.27	18.25	0	1.89	22.7
14:42:33	1179.46	1092.1	87.3648	0	0	0	382.228	131.222	262.098	0.294556	0.231486	0.000587757	0.00429514	0.0033909	0.00492811	0.250204	0.599433	0.113211	0.190026	0.0917804	TRUE	FALSE	TRUE	TRUE	470.54	565.16	6.52	6.24	0	0	1.14	62.27	18.25	0	1.89	22.7
14:42:34	1179.46	1103.02	98.2856	0	0	0	393.149	120.301	262.098	0.293539	0.230807	0.00045212	0.00429514	0.0033909	0.0052446	0.249616	0.599523	0.113166	0.189936	0.0911927	TRUE	FALSE	TRUE	TRUE	470.54	565.16	6.52	6.24	0	0	1.14	62.27	18.25	0	1.89	22.7
14:42:35	1168.54	1092.1	87.3648	0	0	0	393.149	131.222	251.177	0.293426	0.230581	0.000316484	0.00429514	0.0033909	0.00556108	0.249887	0.599162	0.113347	0.189439	0.0915996	TRUE	FALSE	TRUE	TRUE	470.54	565.16	6.52	6.24	0	0	1.14	62.27	18.25	0	1.87	22.7
14:42:36	1179.46	1092.1	98.2856	0	0	0	393.149	120.301	262.098	0.293539	0.230581	0.000406908	0.00440817	0.00350393	0.00506375	0.248983	0.598574	0.113573	0.189167	0.0917352	TRUE	FALSE	TRUE	TRUE	470.54	559.09	6.52	6.24	0	0	1.14	62.27	18.25	0	1.87	22.7
14:42:37	1179.46	1103.02	87.3648	0	0	0	393.149	131.222	251.177	0.293426	0.230921	0.000406908	0.00440817	0.0033909	0.00578714	0.250339	0.598212	0.113753	0.188851	0.0922778	TRUE	FALSE	TRUE	TRUE	470.54	559.09	6.52	6.23	0	0	1.14	62.27	18.25	0	1.87	22.7
14:42:38	1168.54	1092.1	98.2856	0	0	0	393.149	120.301	262.098	0.293878	0.231147	0.00022606	0.00429514	0.00327787	0.00560629	0.249797	0.598032	0.113753	0.188579	0.0922778	TRUE	FALSE	TRUE	TRUE	470.54	558.21	6.52	6.23	0	0	1.14	62.27	18.25	0	1.87	22.7
14:42:39	1179.46	1092.1	87.3648	0	0	0	393.149	120.301	251.177	0.293878	0.230921	0.000135636	0.00418211	0.0033909	0.00565151	0.249661	0.597851	0.113799	0.188082	0.0922778	TRUE	FALSE	TRUE	TRUE	470.54	558.21	6.52	6.22	0	0	1.14	62.27	18.25	0	1.87	22.7
14:42:40	1179.46	1092.1	98.2856	0	0	0	382.228	131.222	262.098	0.293539	0.230921	0.00045212	0.00429514	0.0033909	0.00565151	0.24948	0.597218	0.114206	0.187901	0.0930012	TRUE	FALSE	TRUE	TRUE	470.54	557.3	6.52	6.22	0	0	1.14	62.27	18.25	0	1.87	22.7
14:42:41	1179.46	1103.02	98.2856	0	0	0	393.149	120.301	251.177	0.293313	0.230468	0.00045212	0.00429514	0.0033909	0.00574193	0.250294	0.597218	0.114296	0.18763	0.0928203	TRUE	FALSE	TRUE	TRUE	470.54	557.3	6.52	6.22	0	0	1.14	62.73	18.25	0	1.87	22.7
14:42:42	1168.54	1092.1	87.3648	0	0	0	393.149	131.222	251.177	0.293539	0.230921	0.000271272	0.00429514	0.00316484	0.00556108	0.249932	0.596811	0.114206	0.186861	0.0931368	TRUE	FALSE	TRUE	TRUE	470.54	556.54	6.52	6.22	0	0	1.14	62.73	18.25	0	1.87	22.7
14:42:43	1179.46	1092.1	98.2856	0	0	0	393.149	131.222	262.098	0.293313	0.230355	0.000180848	0.00429514	0.00316484	0.00596799	0.24939	0.596449	0.114341	0.186907	0.0935437	TRUE	FALSE	TRUE	TRUE	470.54	556.54	6.52	6.23	0	0	1.14	62.67	18.25	0	1.87	22.7
14:42:44	1179.46	1103.02	87.3648	0	0	0	393.149	120.301	251.177	0.293426	0.230921	0.000316484	0.00418211	0.00327787	0.00538023	0.249842	0.596133	0.114477	0.186364	0.0936341	TRUE	FALSE	TRUE	TRUE	470.54	556.54	6.52	6.23	0	0	1.14	62.67	18.25	0	1.87	22.7
14:42:45	1168.54	1092.1	98.2856	0	0	0	393.149	131.222	262.098	0.293426	0.231034	0.00045212	0.00429514	0.0033909	0.00515417	0.249073	0.595997	0.114522	0.186454	0.0939506	TRUE	FALSE	TRUE	TRUE	470.54	556.54	6.52	6.23	0	0	1.14	62.72	18.25	0	1.87	22.7
14:42:46	1179.46	1092.1	87.3648	0	0	0	393.149	120.301	262.098	0.293313	0.230355	0.000316484	0.00429514	0.00316484	0.00556108	0.249797	0.595635	0.114748	0.185234	0.0939506	TRUE	FALSE	TRUE	TRUE	472.57	556.54	6.52	6.23	0	0	1.14	62.72	18.25	0	1.87	22.7
14:42:47	1179.46	1092.1	98.2856	0	0	0	393.149	131.222	251.177	0.293313	0.230468	0.000361696	0.00429514	0.0033909	0.00542545	0.249209	0.595364	0.114703	0.184736	0.0940863	TRUE	FALSE	TRUE	TRUE	472.57	556.54	6.46	6.23	0	0	1.14	62.72	18.25	0	1.87	22.7
14:42:48	1179.46	1103.02	87.3648	0	0	0	393.149	120.301	262.098	0.293426	0.230468	0.000316484	0.00429514	0.00327787	0.00510896	0.249751	0.595093	0.114974	0.184375	0.0948549	TRUE	FALSE	TRUE	TRUE	474.2	556.54	6.46	6.23	0	0	1.14	62.86	18.25	0	1.87	22.7
14:42:49	1168.54	1092.1	98.2856	0	0	0	393.149	131.222	251.177	0.293991	0.230921	0.000542545	0.00429514	0.00305181	0.00578714	0.249525	0.594912	0.114839	0.184239	0.0945384	TRUE	FALSE	TRUE	TRUE	474.2	556.54	6.45	6.23	0	0	1.14	62.86	18.25	0	1.87	22.7
14:42:50	1179.46	1092.1	87.3648	0	0	0	393.149	120.301	262.098	0.294104	0.231373	0.000316484	0.00418211	0.00327787	0.00565151	0.249751	0.59446	0.115019	0.183471	0.0951714	TRUE	FALSE	TRUE	TRUE	474.8	556.54	6.45	6.23	0	0	1.14	62.86	18.25	0	1.87	22.7
14:42:51	1179.46	1103.02	98.2856	0	0	0	393.149	131.222	251.177	0.293765	0.230921	0.00022606	0.00429514	0.00316484	0.00578714	0.249842	0.594369	0.114929	0.183109	0.0953974	TRUE	FALSE	TRUE	TRUE	474.8	556.54	6.43	6.23	0	0	1.14	62.86	18.25	0	1.87	22.7
14:42:52	1179.46	1092.1	87.3648	0	0	0	382.228	120.301	262.098	0.293539	0.230807	0.000361696	0.00418211	0.00327787	0.00556108	0.249616	0.593781	0.115426	0.182431	0.0958495	TRUE	FALSE	TRUE	TRUE	471.75	556.54	6.43	6.23	0	0	1.13	62.86	18.25	0	1.87	22.7
14:42:53	1179.46	1092.1	98.2856	0	0	0	393.149	131.222	251.177	0.293426	0.230355	0.000271272	0.00429514	0.00305181	0.00569672	0.250249	0.593329	0.115381	0.181933	0.0962112	TRUE	FALSE	TRUE	TRUE	471.75	556.54	6.42	6.23	0	0	1.13	62.86	18.25	0	1.87	22.7
14:42:54	1168.54	1103.02	87.3648	0	0	0	393.149	120.301	262.098	0.293426	0.230807	0.00045212	0.00440817	0.00327787	0.00574193	0.249887	0.593058	0.115607	0.181391	0.0964373	TRUE	FALSE	TRUE	TRUE	471.75	556.54	6.42	6.23	0	0	1.14	62.86	18.25	0	1.87	22.7
14:42:55	1179.46	1092.1	98.2856	0	0	0	393.149	131.222	251.177	0.293652	0.230581	0.000316484	0.00440817	0.0033909	0.00533502	0.250068	0.592742	0.115607	0.181481	0.0955783	TRUE	FALSE	TRUE	TRUE	471.75	556.54	6.42	6.23	0	0	1.14	62.86	18.25	0	1.88	22.7
14:42:56	1179.46	1092.1	98.2856	0	0	0	393.149	120.301	262.098	0.293539	0.230581	0	0.00418211	0.00316484	0.00492811	0.249706	0.592651	0.115652	0.180441	0.0955783	TRUE	FALSE	TRUE	TRUE	471.75	550.88	6.42	6.23	0	0	1.14	62.86	18.25	0	1.88	22.7
14:42:57	1179.46	1103.02	87.3648	0	0	0	393.149	120.301	251.177	0.293426	0.230807	0.00022606	0.00429514	0.00305181	0.00560629	0.24939	0.591883	0.115652	0.18026	0.0972511	TRUE	FALSE	TRUE	TRUE	471.75	550.88	6.42	6.23	0	0	1.14	62.86	18.25	0	1.85	22.7
14:42:58	1179.46	1092.1	98.2856	0	0	0	393.149	131.222	262.098	0.293539	0.230355	0.000316484	0.00418211	0.00316484	0.00547066	0.24948	0.591657	0.115924	0.179899	0.0975224	TRUE	FALSE	TRUE	TRUE	471.75	550.88	6.42	6.23	0	0	1.14	62.86	18.25	0	1.85	22.7
14:42:59	1179.46	1103.02	87.3648	0	0	0	393.149	120.301	262.098	0.293652	0.230694	0.000316484	0.00429514	0.00327787	0.00569672	0.249571	0.59143	0.115833	0.179582	0.0972511	TRUE	FALSE	TRUE	TRUE	471.75	550.09	6.42	6.23	0	0	1.14	62.86	18.25	0	1.77	22.7
14:43:00	1168.54	1092.1	98.2856	0	0	0	393.149	131.222	251.177	0.293313	0.230581	0.000361696	0.00429514	0.00327787	0.00565151	0.24939	0.590888	0.116104	0.179311	0.0979293	TRUE	FALSE	TRUE	TRUE	471.75	550.09	6.42	6.23	0	0	1.14	62.86	18.25	0	1.77	22.7
14:43:01	1179.46	1092.1	87.3648	0	0	0	393.149	120.301	262.098	0.293878	0.231034	0.000361696	0.00418211	0.00327787	0.00569672	0.248892	0.590707	0.116059	0.178723	0.0982006	TRUE	FALSE	TRUE	TRUE	471.75	549.27	6.42	6.22	0	0	1.14	62.86	18.25	0	1.87	22.7
14:43:02	1179.46	1092.1	98.2856	0	0	0	393.149	131.222	251.177	0.293426	0.230581	0.000361696	0.00418211	0.00305181	0.00515417	0.249209	0.590119	0.116331	0.178362	0.0978389	TRUE	FALSE	TRUE	TRUE	471.75	549.27	6.42	6.22	0	0	1.14	63.15	18.25	0	1.87	22.7
14:43:03	1179.46	1103.02	87.3648	0	0	0	382.228	120.301	262.098	0.2932	0.230242	0.00022606	0.00429514	0.00316484	0.0052446	0.249661	0.589939	0.116285	0.177955	0.0993309	TRUE	FALSE	TRUE	TRUE	471.75	548.45	6.42	6.23	0	0	1.14	63.15	18.25	0	1.87	22.7
14:43:04	1168.54	1092.1	98.2856	0	0	0	393.149	131.222	251.177	0.293087	0.230129	0.000271272	0.00452121	0.00305181	0.00533502	0.250204	0.589532	0.116647	0.177593	0.0983362	TRUE	FALSE	TRUE	TRUE	471.75	548.45	6.42	6.23	0	0	1.14	63.23	18.25	0	1.87	22.7
14:43:05	1179.46	1092.1	98.2856	0	0	0	393.149	120.301	262.098	0.2932	0.230468	0.000271272	0.00429514	0.00327787	0.00542545	0.248712	0.58926	0.116737	0.177412	0.0991952	TRUE	FALSE	TRUE	TRUE	471.75	548.45	6.42	6.23	0	0	1.14	63.23	18.25	0	1.87	22.7
14:43:06	1179.46	1103.02	87.3648	0	0	0	393.149	131.222	251.177	0.293426	0.230921	0.00022606	0.00429514	0.00316484	0.00551587	0.249254	0.588853	0.116918	0.177412	0.10019	TRUE	FALSE	TRUE	TRUE	471.89	548.45	6.42	6.23	0	0	1.14	63.22	18.25	0	1.87	22.7
14:43:07	1179.46	1092.1	98.2856	0	0	0	393.149	120.301	262.098	0.2932	0.230468	0.00022606	0.00418211	0.00327787	0.00519938	0.249435	0.588401	0.116647	0.176734	0.0998734	TRUE	FALSE	TRUE	TRUE	471.89	548.45	6.38	6.23	0	0	1.14	63.22	18.25	0	1.87	22.7
14:43:08	1168.54	1092.1	87.3648	0	0	0	393.149	131.222	251.177	0.293313	0.230807	0.00022606	0.00429514	0.0033909	0.00574193	0.248666	0.58813	0.116873	0.176689	0.0998282	TRUE	FALSE	TRUE	TRUE	468.93	548.45	6.38	6.23	0	0	1.14	63.29	18.25	0	1.87	22.7
14:43:09	1179.46	1103.02	98.2856	0	0	0	393.149	120.301	262.098	0.294443	0.231147	0.000271272	0.00418211	0.00316484	0.00569672	0.249073	0.587723	0.116964	0.176056	0.0993761	TRUE	FALSE	TRUE	TRUE	468.93	548.45	6.37	6.23	0	0	1.14	63.29	18.25	0	1.87	22.7
14:43:10	1179.46	1092.1	87.3648	0	0	0	393.149	131.222	251.177	0.293652	0.230921	0.000316484	0.00406908	0.00305181	0.00596799	0.248802	0.587407	0.11728	0.17583	0.0999186	TRUE	FALSE	TRUE	TRUE	473.33	548.45	6.37	6.23	0	0	1.14	63.29	18.25	0	1.87	22.7
14:43:11	1179.46	1092.1	98.2856	0	0	0	393.149	120.301	262.098	0.2932	0.230807	0.000135636	0.00418211	0.00305181	0.00533502	0.249254	0.587226	0.117054	0.174971	0.0998282	TRUE	FALSE	TRUE	TRUE	473.33	548.45	6.37	6.23	0	0	1.14	63.29	18.25	0	1.87	22.7
14:43:12	1179.46	1092.1	98.2856	0	0	0	393.149	131.222	251.177	0.293426	0.230468	0.00022606	0.00429514	0.00316484	0.00538023	0.249299	0.58709	0.117235	0.174564	0.100778	TRUE	FALSE	TRUE	TRUE	473.33	548.45	6.35	6.23	0	0	1.13	63.29	18.25	0	1.87	22.7
14:43:13	1179.46	1103.02	87.3648	0	0	0	393.149	120.301	262.098	0.2932	0.230468	0.000361696	0.00418211	0.00327787	0.00556108	0.248576	0.586683	0.117461	0.174247	0.101682	TRUE	FALSE	TRUE	TRUE	467.03	548.45	6.35	6.23	0	0	1.13	63.29	18.25	0	1.87	22.7
14:43:14	1179.46	1092.1	98.2856	0	0	0	393.149	131.222	262.098	0.293087	0.230242	0.00022606	0.00429514	0.00305181	0.00578714	0.249209	0.586141	0.11728	0.173976	0.100778	TRUE	FALSE	TRUE	TRUE	467.03	548.45	6.34	6.23	0	0	1.14	63.29	18.25	0	1.87	22.7
14:43:15	1168.54	1092.1	87.3648	0	0	0	382.228	120.301	251.177	0.293087	0.230355	0.000180848	0.00429514	0.00327787	0.00551587	0.249028	0.586095	0.117416	0.173479	0.101953	TRUE	FALSE	TRUE	TRUE	467.03	548.45	6.34	6.23	0	0	1.14	63.29	18.25	0	1.75	22.7
14:43:16	1179.46	1103.02	98.2856	0	0	0	393.149	120.301	262.098	0.293426	0.230468	0.000135636	0.00429514	0.00316484	0.00551587	0.248938	0.586005	0.117642	0.173026	0.101139	TRUE	FALSE	TRUE	TRUE	467.03	548.45	6.34	6.23	0	0	1.14	63.29	18.25	0	1.75	22.7
14:43:17	1179.46	1092.1	87.3648	0	0	0	393.149	131.222	251.177	0.2932	0.230242	0.00022606	0.00429514	0.00305181	0.00556108	0.249571	0.585508	0.118049	0.172981	0.101365	TRUE	FALSE	TRUE	TRUE	467.03	543.52	6.34	6.23	0	0	1.14	63.29	18.25	0	1.75	22.7
14:43:18	1179.46	1092.1	98.2856	0	0	0	393.149	120.301	262.098	0.2932	0.230468	0.000497333	0.00429514	0.00327787	0.0063749	0.250158	0.585191	0.117913	0.172303	0.102224	TRUE	FALSE	TRUE	TRUE	467.03	543.52	6.34	6.23	0	0	1.14	63.29	18.25	0	1.83	22.7
14:43:19	1168.54	1103.02	98.2856	0	0	0	393.149	131.222	251.177	0.293087	0.230581	0.000180848	0.00418211	0.00327787	0.00565151	0.248757	0.584875	0.117868	0.172348	0.102315	TRUE	FALSE	TRUE	TRUE	467.03	543.21	6.34	6.23	0	0	1.14	63.29	18.25	0	1.83	22.7
14:43:20	1179.46	1092.1	87.3648	0	0	0	393.149	120.301	262.098	0.293765	0.231034	0.000135636	0.00418211	0.00316484	0.00528981	0.248938	0.584558	0.118094	0.171354	0.103038	TRUE	FALSE	TRUE	TRUE	467.03	543.21	6.34	6.23	0	0	1.14	63.29	18.25	0	1.89	22.7
14:43:21	1179.46	1092.1	98.2856	0	0	0	393.149	131.222	251.177	0.293426	0.230581	4.52e-05	0.00429514	0.00327787	0.00547066	0.249797	0.584242	0.11823	0.171354	0.102677	TRUE	FALSE	TRUE	TRUE	467.03	542.62	6.34	6.23	0	0	1.14	63.29	18.25	0	1.89	22.7
14:43:22	1179.46	1092.1	87.3648	0	0	0	393.149	120.301	262.098	0.2932	0.230016	0.00022606	0.00429514	0.00305181	0.00592278	0.250023	0.58397	0.118365	0.170947	0.10245	TRUE	FALSE	TRUE	TRUE	467.03	542.62	6.34	6.23	0	0	1.14	63.63	18.25	0	1.91	22.7
14:43:23	1179.46	1103.02	98.2856	0	0	0	393.149	131.222	251.177	0.293087	0.230242	0.000271272	0.00429514	0.00316484	0.00556108	0.250068	0.583654	0.118546	0.171037	0.103083	TRUE	FALSE	TRUE	TRUE	467.03	541.98	6.34	6.23	0	0	1.14	63.63	18.25	0	1.91	22.7
14:43:24	1179.46	1092.1	87.3648	0	0	0	393.149	120.301	262.098	0.293087	0.230242	4.52e-05	0.00418211	0.00327787	0.00528981	0.249661	0.583564	0.118727	0.170495	0.102903	TRUE	FALSE	TRUE	TRUE	467.03	541.98	6.34	6.23	0	0	1.14	63.79	18.25	0	1.91	22.7
14:43:25	1179.46	1092.1	98.2856	0	0	0	393.149	131.222	251.177	0.293313	0.230242	0.000180848	0.00440817	0.00293878	0.00556108	0.24835	0.583337	0.118546	0.169726	0.10444	TRUE	FALSE	TRUE	TRUE	467.03	541.98	6.34	6.23	0	0	1.14	63.79	18.25	0	1.91	22.7
14:43:26	1179.46	1092.1	98.2856	0	0	0	393.149	120.301	262.098	0.2932	0.230242	0.000316484	0.00429514	0.00316484	0.00551587	0.249751	0.582976	0.118591	0.16959	0.104485	TRUE	FALSE	TRUE	TRUE	467.03	541.98	6.34	6.23	0	0	1.14	63.81	18.25	0	1.91	22.7
14:43:27	1168.54	1103.02	87.3648	0	0	0	382.228	120.301	251.177	0.2932	0.230355	0.000271272	0.00429514	0.00305181	0.00574193	0.248983	0.582524	0.118591	0.169636	0.103852	TRUE	FALSE	TRUE	TRUE	465.3	541.98	6.34	6.23	0	0	1.14	63.81	18.25	0	1.91	22.7
14:43:28	1179.46	1092.1	98.2856	0	0	0	393.149	131.222	262.098	0.2932	0.230242	0.000180848	0.00429514	0.00327787	0.00547066	0.249525	0.582433	0.118682	0.169229	0.103852	TRUE	FALSE	TRUE	TRUE	465.3	541.98	6.29	6.23	0	0	1.14	63.93	18.25	0	1.91	22.7
14:43:29	1179.46	1092.1	87.3648	0	0	0	393.149	120.301	251.177	0.2932	0.230355	0.000361696	0.00418211	0.00327787	0.00547066	0.249164	0.581755	0.118862	0.168641	0.104349	TRUE	FALSE	TRUE	TRUE	465.49	541.98	6.29	6.23	0	0	1.14	63.93	18.25	0	1.91	22.7
14:43:30	1179.46	1092.1	98.2856	0	0	0	393.149	131.222	262.098	0.293313	0.230468	0.00022606	0.00418211	0.00305181	0.00583235	0.250294	0.581574	0.118998	0.168098	0.105073	TRUE	FALSE	TRUE	TRUE	465.49	541.98	6.28	6.23	0	0	1.14	63.93	18.25	0	1.91	22.7
14:43:31	1179.46	1103.02	98.2856	0	0	0	393.149	120.301	251.177	0.293426	0.230355	0.000361696	0.00418211	0.00305181	0.00547066	0.249299	0.581393	0.119088	0.167646	0.104802	TRUE	FALSE	TRUE	TRUE	462.9	541.98	6.28	6.23	0	0	1.14	63.93	18.25	0	1.91	22.7
14:43:32	1179.46	1092.1	87.3648	0	0	0	393.149	131.222	262.098	0.293087	0.230242	0.00022606	0.00418211	0.0033909	0.0052446	0.249254	0.581077	0.119224	0.167285	0.10557	TRUE	FALSE	TRUE	TRUE	462.9	541.98	6.28	6.23	0	0	1.13	63.93	18.25	0	1.91	22.7
14:43:33	1168.54	1092.1	98.2856	0	0	0	393.149	120.301	251.177	0.2932	0.230242	0.000316484	0.00429514	0.00305181	0.00587757	0.250023	0.580896	0.119269	0.167149	0.106158	TRUE	FALSE	TRUE	TRUE	463.99	541.98	6.28	6.23	0	0	1.13	63.93	18.25	0	1.91	22.7
14:43:34	1179.46	1103.02	87.3648	0	0	0	393.149	131.222	262.098	0.293313	0.230468	0.000135636	0.00429514	0.0033909	0.00560629	0.249887	0.580489	0.119541	0.166561	0.105254	TRUE	FALSE	TRUE	TRUE	463.99	541.98	6.26	6.23	0	0	1.14	63.93	18.25	0	1.91	22.7
14:43:35	1179.46	1092.1	98.2856	0	0	0	393.149	120.301	251.177	0.293878	0.231147	0.000135636	0.00440817	0.00327787	0.0052446	0.249164	0.580082	0.119767	0.165973	0.10557	TRUE	FALSE	TRUE	TRUE	463.99	541.98	6.26	6.23	0	0	1.14	63.93	18.25	0	1.91	22.7
14:43:36	1179.46	1092.1	98.2856	0	0	0	393.149	131.222	262.098	0.293426	0.230807	0	0.00418211	0.0033909	0.0052446	0.249344	0.579811	0.119812	0.165702	0.106384	TRUE	FALSE	TRUE	TRUE	463.99	541.98	6.26	6.23	0	0	1.14	63.93	18.25	0	1.83	22.7
14:43:37	1179.46	1103.02	87.3648	0	0	0	393.149	120.301	251.177	0.2932	0.230581	0.000180848	0.00418211	0.00305181	0.00542545	0.248712	0.579404	0.119721	0.165973	0.106429	TRUE	FALSE	TRUE	TRUE	463.99	538.12	6.26	6.23	0	0	1.14	63.93	18.25	0	1.83	22.7
14:43:38	1179.46	1092.1	98.2856	0	0	0	393.149	131.222	262.098	0.293539	0.230355	0.000180848	0.00440817	0.00305181	0.00533502	0.24939	0.579133	0.120038	0.165114	0.10661	TRUE	FALSE	TRUE	TRUE	463.99	538.12	6.26	6.23	0	0	1.14	63.93	18.25	0	1.92	22.7
14:43:39	1168.54	1092.1	87.3648	0	0	0	393.149	120.301	262.098	0.293313	0.230242	0.00022606	0.00429514	0.00316484	0.00556108	0.249118	0.578635	0.120083	0.16525	0.106926	TRUE	FALSE	TRUE	TRUE	463.99	537.46	6.26	6.23	0	0	1.14	63.93	18.25	0	1.92	22.7
14:43:40	1179.46	1092.1	98.2856	0	0	0	393.149	131.222	251.177	0.293426	0.230355	0.000135636	0.00440817	0.00327787	0.0052446	0.249751	0.57859	0.120128	0.164572	0.106972	TRUE	FALSE	TRUE	TRUE	463.99	537.46	6.26	6.23	0	0	1.14	63.93	18.25	0	1.93	22.7
14:43:41	1179.46	1103.02	98.2856	0	0	0	393.149	120.301	262.098	0.293087	0.230355	0.000271272	0.00429514	0.00316484	0.00538023	0.249525	0.578319	0.120083	0.164391	0.10765	TRUE	FALSE	TRUE	TRUE	463.99	536.94	6.26	6.23	0	0	1.14	63.93	18.25	0	1.93	22.7
14:43:42	1179.46	1092.1	87.3648	0	0	0	393.149	120.301	251.177	0.293313	0.230355	9.04e-05	0.00429514	0.00327787	0.0052446	0.248892	0.577912	0.120355	0.163848	0.108147	TRUE	FALSE	TRUE	TRUE	463.99	536.94	6.26	6.23	0	0	1.14	64.32	18.25	0	1.92	22.7
14:43:43	1179.46	1092.1	98.2856	0	0	0	382.228	131.222	262.098	0.293313	0.230581	-4.52e-05	0.00429514	0.00316484	0.00506375	0.249254	0.577641	0.120174	0.163894	0.107876	TRUE	FALSE	TRUE	TRUE	463.99	536.44	6.26	6.23	0	0	1.14	64.32	18.25	0	1.92	22.7
14:43:44	1168.54	1092.1	87.3648	0	0	0	393.149	120.301	251.177	0.293087	0.230355	0.000180848	0.00418211	0.00305181	0.00556108	0.249164	0.577279	0.120535	0.163261	0.108373	TRUE	FALSE	TRUE	TRUE	463.99	536.44	6.26	6.23	0	0	1.14	64.58	18.25	0	1.92	22.7
14:43:45	1179.46	1103.02	98.2856	0	0	0	393.149	120.301	262.098	0.293313	0.230468	-4.52e-05	0.00429514	0.00305181	0.00547066	0.248621	0.577144	0.12058	0.162944	0.108328	TRUE	FALSE	TRUE	TRUE	463.99	536.44	6.26	6.23	0	0	1.14	64.58	18.25	0	1.92	22.7
14:43:46	1179.46	1092.1	98.2856	0	0	0	393.149	131.222	251.177	0.293426	0.230921	0	0.00429514	0.00327787	0.0052446	0.248395	0.577008	0.120852	0.162537	0.108238	TRUE	FALSE	TRUE	TRUE	463.99	536.44	6.26	6.23	0	0	1.14	64.68	18.25	0	1.92	22.7
14:43:47	1179.46	1092.1	87.3648	0	0	0	393.149	120.301	262.098	0.293313	0.230581	9.04e-05	0.00429514	0.00327787	0.00538023	0.249751	0.576511	0.120716	0.162311	0.109323	TRUE	FALSE	TRUE	TRUE	463.5	536.44	6.26	6.23	0	0	1.14	64.68	18.25	0	1.92	22.7
14:43:48	1179.46	1103.02	98.2856	0	0	0	393.149	131.222	251.177	0.293313	0.230468	0.000180848	0.00440817	0.00316484	0.00542545	0.248485	0.576104	0.120987	0.161769	0.10991	TRUE	FALSE	TRUE	TRUE	463.5	536.44	6.21	6.23	0	0	1.14	64.67	18.25	0	1.92	22.7
14:43:49	1179.46	1092.1	98.2856	0	0	0	393.149	120.301	262.098	0.293426	0.230355	0.000135636	0.00429514	0.00305181	0.00533502	0.248847	0.575923	0.121033	0.161543	0.109413	TRUE	FALSE	TRUE	TRUE	463.32	536.44	6.21	6.23	0	0	1.14	64.67	18.25	0	1.92	22.7
14:43:50	1179.46	1092.1	87.3648	0	0	0	393.149	131.222	251.177	0.293426	0.230468	0.00022606	0.00429514	0.00305181	0.00560629	0.248485	0.575561	0.120897	0.161407	0.109504	TRUE	FALSE	TRUE	TRUE	463.32	536.44	6.2	6.23	0	0	1.14	64.67	18.25	0	1.92	22.7
14:43:51	1179.46	1092.1	98.2856	0	0	0	393.149	120.301	262.098	0.2932	0.230468	0.000316484	0.00429514	0.00316484	0.00506375	0.24948	0.57529	0.121033	0.160684	0.109594	TRUE	FALSE	TRUE	TRUE	462.01	536.44	6.2	6.23	0	0	1.14	64.67	18.25	0	1.92	22.7
14:43:52	1179.46	1103.02	87.3648	0	0	0	393.149	131.222	262.098	0.293313	0.230355	9.04e-05	0.00418211	0.00305181	0.00533502	0.249571	0.574883	0.121168	0.160322	0.110227	TRUE	FALSE	TRUE	TRUE	462.01	536.44	6.19	6.23	0	0	1.13	64.67	18.25	0	1.92	22.7
14:43:53	1168.54	1092.1	98.2856	0	0	0	393.149	120.301	251.177	0.292974	0.230242	9.04e-05	0.00406908	0.00327787	0.00483769	0.249028	0.574747	0.121304	0.160005	0.110905	TRUE	FALSE	TRUE	TRUE	459.6	536.44	6.19	6.23	0	0	1.13	64.67	18.25	0	1.92	22.7
14:43:54	1179.46	1092.1	98.2856	0	0	0	382.228	131.222	251.177	0.293087	0.230355	9.04e-05	0.00440817	0.00327787	0.00506375	0.249254	0.574612	0.121485	0.159282	0.11095	TRUE	FALSE	TRUE	TRUE	459.6	536.44	6.2	6.23	0	0	1.14	64.67	18.25	0	1.92	22.7
14:43:55	1179.46	1092.1	87.3648	0	0	0	393.149	120.301	262.098	0.2932	0.230468	0.000271272	0.00418211	0.00327787	0.00560629	0.249797	0.573979	0.121575	0.15892	0.111131	TRUE	FALSE	TRUE	TRUE	459.6	536.44	6.2	6.23	0	0	1.14	64.67	18.25	0	1.92	22.7
14:43:56	1179.46	1103.02	98.2856	0	0	0	393.149	131.222	251.177	0.2932	0.230581	0.000180848	0.00418211	0.00305181	0.00556108	0.249073	0.573707	0.121801	0.15874	0.111493	TRUE	FALSE	TRUE	TRUE	459.6	536.44	6.2	6.23	0	0	1.14	64.67	18.25	0	1.91	22.7
14:43:57	1179.46	1092.1	87.3648	0	0	0	393.149	120.301	262.098	0.293313	0.230921	0.000180848	0.00429514	0.00327787	0.00538023	0.248938	0.573662	0.121982	0.158061	0.111222	TRUE	FALSE	TRUE	TRUE	459.6	533.4	6.2	6.23	0	0	1.14	64.67	18.25	0	1.91	22.7
14:43:58	1168.54	1092.1	98.2856	0	0	0	393.149	131.222	251.177	0.293539	0.230581	0.000135636	0.00418211	0.00305181	0.00560629	0.249344	0.573346	0.121801	0.158287	0.112262	TRUE	FALSE	TRUE	TRUE	459.6	533.4	6.2	6.22	0	0	1.14	64.67	18.25	0	1.8	22.7
14:43:59	1179.46	1103.02	98.2856	0	0	0	393.149	120.301	262.098	0.293313	0.230468	0.000135636	0.00429514	0.00305181	0.00497332	0.24939	0.573391	0.121982	0.157609	0.111855	TRUE	FALSE	TRUE	TRUE	459.6	532.88	6.2	6.22	0	0	1.14	64.67	18.25	0	1.8	22.7
14:44:00	1179.46	1092.1	87.3648	0	0	0	393.149	120.301	262.098	0.293426	0.230581	4.52e-05	0.00429514	0.00327787	0.00578714	0.250384	0.572713	0.122118	0.157112	0.112352	TRUE	FALSE	TRUE	TRUE	459.6	532.88	6.2	6.21	0	0	1.14	64.67	18.25	0	1.92	22.7
14:44:01	1179.46	1092.1	98.2856	0	0	0	393.149	120.301	251.177	0.293878	0.230581	0.000135636	0.00429514	0.00305181	0.00551587	0.249751	0.572442	0.122299	0.15675	0.112307	TRUE	FALSE	TRUE	TRUE	459.6	532.36	6.2	6.21	0	0	1.14	64.67	18.25	0	1.92	22.7
14:44:02	1179.46	1092.1	98.2856	0	0	0	393.149	131.222	262.098	0.293313	0.230921	0.000180848	0.00418211	0.00305181	0.00547066	0.248621	0.572035	0.122525	0.156841	0.112578	TRUE	FALSE	TRUE	TRUE	459.6	532.36	6.2	6.21	0	0	1.14	64.85	18.25	0	1.94	22.7
14:44:03	1179.46	1103.02	87.3648	0	0	0	393.149	131.222	251.177	0.2932	0.230242	0.000180848	0.00429514	0.00305181	0.00533502	0.249344	0.572215	0.122525	0.155529	0.113527	TRUE	FALSE	TRUE	TRUE	459.6	532	6.2	6.21	0	0	1.14	64.85	18.25	0	1.94	22.7
14:44:04	1168.54	1092.1	98.2856	0	0	0	393.149	120.301	262.098	0.293087	0.230242	0	0.00418211	0.00305181	0.00556108	0.249661	0.571763	0.12266	0.155665	0.11312	TRUE	FALSE	TRUE	TRUE	459.6	532	6.2	6.21	0	0	1.14	64.92	18.25	0	1.94	22.7
14:44:05	1179.46	1092.1	98.2856	0	0	0	393.149	131.222	251.177	0.293313	0.230468	9.04e-05	0.00429514	0.00305181	0.00574193	0.250475	0.571402	0.122751	0.155575	0.113708	TRUE	FALSE	TRUE	TRUE	459.6	532	6.2	6.21	0	0	1.14	64.92	18.25	0	1.94	22.7
14:44:06	1179.46	1092.1	87.3648	0	0	0	393.149	120.301	262.098	0.293539	0.230581	4.52e-05	0.00440817	0.0033909	0.00565151	0.249435	0.57113	0.12257	0.155122	0.114025	TRUE	FALSE	TRUE	TRUE	459.6	532	6.2	6.21	0	0	1.14	64.98	18.25	0	1.94	22.7
14:44:07	1179.46	1103.02	98.2856	0	0	0	382.228	131.222	251.177	0.2932	0.230355	4.52e-05	0.00429514	0.00305181	0.00506375	0.248802	0.570949	0.122796	0.154716	0.113889	TRUE	FALSE	TRUE	TRUE	460.98	532	6.2	6.21	0	0	1.14	64.98	18.25	0	1.94	22.7
14:44:08	1179.46	1092.1	98.2856	0	0	0	393.149	131.222	262.098	0.293426	0.230694	4.52e-05	0.00418211	0.00327787	0.00519938	0.24948	0.570497	0.122977	0.154444	0.114296	TRUE	FALSE	TRUE	TRUE	460.98	532	6.11	6.21	0	0	1.14	64.98	18.25	0	1.94	22.7
14:44:09	1179.46	1092.1	87.3648	0	0	0	393.149	120.301	251.177	0.293539	0.230807	0	0.00429514	0.00305181	0.00474726	0.248802	0.570317	0.123158	0.154309	0.114206	TRUE	FALSE	TRUE	TRUE	463.34	532	6.11	6.21	0	0	1.14	64.98	18.25	0	1.94	22.7
14:44:10	1179.46	1092.1	98.2856	0	0	0	393.149	131.222	262.098	0.293426	0.230468	4.52e-05	0.00418211	0.00316484	0.00501854	0.249751	0.56991	0.123112	0.153314	0.11416	TRUE	FALSE	TRUE	TRUE	463.34	532	6.1	6.21	0	0	1.14	64.98	18.25	0	1.94	22.7
14:44:11	1179.46	1103.02	87.3648	0	0	0	393.149	131.222	251.177	0.293539	0.230468	-0.000180848	0.00429514	0.00293878	0.00510896	0.24948	0.569593	0.123158	0.153269	0.114929	TRUE	FALSE	TRUE	TRUE	464.25	532	6.1	6.21	0	0	1.14	64.98	18.25	0	1.94	22.7
14:44:12	1179.46	1092.1	98.2856	0	0	0	393.149	120.301	262.098	0.293426	0.230807	0.000135636	0.00418211	0.00327787	0.00565151	0.249751	0.569593	0.123203	0.153404	0.115472	TRUE	FALSE	TRUE	TRUE	464.25	532	6.09	6.21	0	0	1.14	64.98	18.25	0	1.94	22.7
14:44:13	1179.46	1092.1	98.2856	0	0	0	393.149	131.222	251.177	0.2932	0.230581	-9.04e-05	0.00429514	0.00316484	0.00538023	0.250023	0.569322	0.123384	0.152636	0.114929	TRUE	FALSE	TRUE	TRUE	465.52	532	6.09	6.21	0	0	1.14	64.98	18.25	0	1.94	22.7
14:44:14	1179.46	1103.02	87.3648	0	0	0	393.149	120.301	262.098	0.293313	0.230468	0.000180848	0.00418211	0.00327787	0.00501854	0.249661	0.568824	0.12361	0.152365	0.115833	TRUE	FALSE	TRUE	TRUE	465.52	532	6.09	6.21	0	0	1.14	64.98	18.25	0	1.94	22.7
14:44:15	1179.46	1092.1	98.2856	0	0	0	393.149	131.222	251.177	0.293426	0.230581	4.52e-05	0.00429514	0.00316484	0.00483769	0.249842	0.568508	0.123926	0.151867	0.11615	TRUE	FALSE	TRUE	TRUE	465.52	532	6.09	6.21	0	0	1.14	64.98	18.25	0	1.94	22.7
14:44:16	1179.46	1092.1	98.2856	0	0	0	382.228	131.222	262.098	0.293539	0.230807	0.000135636	0.00429514	0.00305181	0.00519938	0.24939	0.568237	0.123926	0.151822	0.11615	TRUE	FALSE	TRUE	TRUE	465.52	532	6.09	6.21	0	0	1.14	64.98	18.25	0	1.88	22.7
14:44:17	1168.54	1092.1	87.3648	0	0	0	393.149	120.301	251.177	0.293652	0.230921	0.000135636	0.00429514	0.0033909	0.00551587	0.250475	0.567739	0.124333	0.151189	0.11624	TRUE	FALSE	TRUE	TRUE	465.52	529.23	6.09	6.21	0	0	1.14	64.98	18.25	0	1.88	22.7
14:44:18	1179.46	1103.02	98.2856	0	0	0	393.149	131.222	262.098	0.293426	0.230921	0	0.00429514	0.00327787	0.00538023	0.249571	0.567559	0.124152	0.151189	0.116783	TRUE	FALSE	TRUE	TRUE	465.52	529.23	6.09	6.21	0	0	1.14	64.98	18.25	0	1.91	22.7
14:44:19	1179.46	1092.1	98.2856	0	0	0	393.149	131.222	251.177	0.293652	0.230921	-0.000180848	0.00429514	0.00316484	0.00538023	0.249751	0.566926	0.124107	0.150737	0.117054	TRUE	FALSE	TRUE	TRUE	465.52	528.82	6.09	6.21	0	0	1.14	64.98	18.25	0	1.91	22.7
14:44:20	1179.46	1092.1	87.3648	0	0	0	393.149	120.301	262.098	0.293878	0.230921	9.04e-05	0.00429514	0.00316484	0.00533502	0.249842	0.567061	0.124198	0.150692	0.117687	TRUE	FALSE	TRUE	TRUE	465.52	528.82	6.09	6.21	0	0	1.14	64.98	18.25	0	1.92	22.7
14:44:21	1179.46	1103.02	98.2856	0	0	0	393.149	131.222	262.098	0.293878	0.231373	9.04e-05	0.00440817	0.00327787	0.00542545	0.249797	0.566428	0.124469	0.149833	0.117325	TRUE	FALSE	TRUE	TRUE	465.52	528.39	6.09	6.21	0	0	1.14	64.98	18.25	0	1.92	22.7
14:44:22	1190.38	1092.1	98.2856	0	0	0	393.149	131.222	251.177	0.293426	0.230921	9.04e-05	0.00429514	0.00305181	0.0052446	0.249797	0.566112	0.124785	0.149381	0.117144	TRUE	FALSE	TRUE	TRUE	465.52	528.39	6.09	6.21	0	0	1.14	65.39	18.25	0	1.89	22.7
14:44:23	1168.54	1092.1	87.3648	0	0	0	393.149	120.301	251.177	0.293313	0.230807	9.04e-05	0.00429514	0.00316484	0.00533502	0.249073	0.566021	0.124785	0.149471	0.117371	TRUE	FALSE	TRUE	TRUE	465.52	528.08	6.09	6.21	0	0	1.14	65.39	18.25	0	1.89	22.7
14:44:24	1179.46	1103.02	98.2856	0	0	0	393.149	131.222	262.098	0.293652	0.231034	0.000271272	0.00429514	0.00327787	0.00542545	0.248531	0.56566	0.12483	0.149019	0.117913	TRUE	FALSE	TRUE	TRUE	465.52	528.08	6.09	6.21	0	0	1.14	65.47	18.25	0	1.89	22.7
14:44:25	1179.46	1092.1	98.2856	0	0	0	393.149	131.222	251.177	0.293991	0.231147	4.52e-05	0.00418211	0.00316484	0.00501854	0.249571	0.565298	0.125056	0.148522	0.118591	TRUE	FALSE	TRUE	TRUE	465.52	528.08	6.09	6.21	0	0	1.14	65.47	18.25	0	1.89	22.7
14:44:26	1179.46	1092.1	98.2856	0	0	0	393.149	120.301	262.098	0.293765	0.230694	0.000135636	0.00429514	0.00316484	0.00492811	0.248938	0.565072	0.125283	0.147979	0.118184	TRUE	FALSE	TRUE	TRUE	465.52	528.08	6.09	6.21	0	0	1.14	65.47	18.25	0	1.89	22.7
14:44:27	1179.46	1103.02	87.3648	0	0	0	393.149	131.222	251.177	0.293652	0.230807	0.000135636	0.00429514	0.00305181	0.00506375	0.249435	0.564801	0.125147	0.147979	0.118275	TRUE	FALSE	TRUE	TRUE	466.44	528.08	6.09	6.21	0	0	1.14	65.45	18.25	0	1.89	22.7
14:44:28	1179.46	1092.1	98.2856	0	0	0	382.228	131.222	262.098	0.293539	0.231034	0	0.00418211	0.00327787	0.00501854	0.24948	0.564529	0.125328	0.147391	0.119179	TRUE	FALSE	TRUE	TRUE	466.44	528.08	6.04	6.21	0	0	1.14	65.45	18.25	0	1.89	22.7
14:44:29	1168.54	1092.1	98.2856	0	0	0	393.149	120.301	251.177	0.293539	0.230581	0	0.00429514	0.00316484	0.00492811	0.249706	0.564213	0.125418	0.146849	0.119586	TRUE	FALSE	TRUE	TRUE	465.27	528.08	6.04	6.21	0	0	1.14	65.48	18.25	0	1.89	22.7
14:44:30	1179.46	1103.02	87.3648	0	0	0	393.149	131.222	262.098	0.293539	0.230694	0	0.00429514	0.00316484	0.00501854	0.248621	0.56367	0.125735	0.147165	0.119088	TRUE	FALSE	TRUE	TRUE	465.27	528.08	6.03	6.21	0	0	1.14	65.48	18.25	0	1.89	22.7
14:44:31	1179.46	1092.1	98.2856	0	0	0	393.149	131.222	251.177	0.293652	0.230581	4.52e-05	0.00429514	0.00327787	0.00565151	0.249209	0.563399	0.125599	0.146306	0.120128	TRUE	FALSE	TRUE	TRUE	463.63	528.08	6.03	6.21	0	0	1.14	65.48	18.25	0	1.89	22.7
14:44:32	1179.46	1092.1	98.2856	0	0	0	393.149	120.301	262.098	0.29433	0.23126	4.52e-05	0.00440817	0.00305181	0.00515417	0.249977	0.563354	0.12569	0.145854	0.119586	TRUE	FALSE	TRUE	TRUE	463.63	528.08	6.03	6.21	0	0	1.14	65.48	18.25	0	1.89	22.7
14:44:33	1179.46	1103.02	87.3648	0	0	0	393.149	131.222	251.177	0.293652	0.231147	4.52e-05	0.00440817	0.0033909	0.00515417	0.249525	0.563128	0.125961	0.145176	0.119948	TRUE	FALSE	TRUE	TRUE	464.26	528.08	6.03	6.21	0	0	1.13	65.48	18.25	0	1.89	22.7
14:44:34	1179.46	1092.1	98.2856	0	0	0	393.149	131.222	262.098	0.293652	0.230921	4.52e-05	0.00429514	0.00316484	0.00547066	0.249797	0.562585	0.126187	0.145131	0.120128	TRUE	FALSE	TRUE	TRUE	464.26	528.08	6.03	6.21	0	0	1.13	65.48	18.25	0	1.89	22.7
14:44:35	1179.46	1092.1	98.2856	0	0	0	393.149	120.301	251.177	0.293539	0.230581	-4.52e-05	0.00440817	0.0033909	0.00510896	0.249073	0.562404	0.12578	0.144633	0.120626	TRUE	FALSE	TRUE	TRUE	464.26	528.08	6.03	6.21	0	0	1.14	65.48	18.25	0	1.89	22.7
14:44:36	1179.46	1103.02	87.3648	0	0	0	393.149	131.222	262.098	0.2932	0.230468	-0.000316484	0.00429514	0.00327787	0.00538023	0.249932	0.561726	0.126232	0.144091	0.120671	TRUE	FALSE	TRUE	TRUE	464.26	528.08	6.03	6.21	0	0	1.14	65.48	18.25	0	1.88	22.7
14:44:37	1168.54	1092.1	98.2856	0	0	0	393.149	131.222	251.177	0.293313	0.230468	4.52e-05	0.00429514	0.00327787	0.00538023	0.250023	0.561907	0.126322	0.143684	0.120942	TRUE	FALSE	TRUE	TRUE	464.26	525.66	6.03	6.21	0	0	1.14	65.48	18.25	0	1.88	22.7
14:44:38	1179.46	1092.1	98.2856	0	0	0	382.228	120.301	262.098	0.293539	0.230581	0	0.00429514	0.00293878	0.00538023	0.250384	0.561726	0.126368	0.143277	0.121394	TRUE	FALSE	TRUE	TRUE	464.26	525.66	6.03	6.21	0	0	1.14	65.48	18.25	0	1.88	22.7
14:44:39	1179.46	1103.02	87.3648	0	0	0	393.149	131.222	262.098	0.293878	0.23126	0.000180848	0.00429514	0.0033909	0.00565151	0.250384	0.561003	0.126368	0.143322	0.121982	TRUE	FALSE	TRUE	TRUE	464.26	525.18	6.03	6.21	0	0	1.13	65.48	18.25	0	1.9	22.7
14:44:40	1179.46	1092.1	98.2856	0	0	0	393.149	131.222	251.177	0.293539	0.230694	4.52e-05	0.00429514	0.00327787	0.00510896	0.249842	0.561093	0.126775	0.142825	0.121846	TRUE	FALSE	TRUE	TRUE	464.26	525.18	6.03	6.21	0	0	1.13	65.48	18.25	0	1.9	22.7
14:44:41	1179.46	1092.1	98.2856	0	0	0	393.149	120.301	262.098	0.293426	0.230581	0.000271272	0.00429514	0.00305181	0.00506375	0.249571	0.560732	0.126594	0.142734	0.121892	TRUE	FALSE	TRUE	TRUE	464.26	524.81	6.03	6.21	0	0	1.13	65.48	18.25	0	1.88	22.7
14:44:42	1179.46	1103.02	98.2856	0	0	0	393.149	131.222	251.177	0.2932	0.230355	0.000180848	0.00418211	0.00327787	0.00510896	0.24948	0.560415	0.126684	0.142282	0.121711	TRUE	FALSE	TRUE	TRUE	464.26	524.81	6.03	6.21	0	0	1.13	65.48	18.25	0	1.88	22.7
14:44:43	1168.54	1092.1	87.3648	0	0	0	393.149	131.222	262.098	0.293539	0.230694	4.52e-05	0.00429514	0.00316484	0.00556108	0.24948	0.560008	0.126955	0.141514	0.122434	TRUE	FALSE	TRUE	TRUE	464.26	524.43	6.03	6.21	0	0	1.13	65.81	18.25	0	1.9	22.7
14:44:44	1179.46	1092.1	98.2856	0	0	0	393.149	120.301	251.177	0.293313	0.230468	0	0.00440817	0.00327787	0.00515417	0.250113	0.559827	0.127227	0.141514	0.122751	TRUE	FALSE	TRUE	TRUE	464.26	524.43	6.03	6.21	0	0	1.13	65.81	18.25	0	1.9	22.7
14:44:45	1179.46	1092.1	98.2856	0	0	0	393.149	131.222	262.098	0.293426	0.230468	-0.000135636	0.00429514	0.00327787	0.00497332	0.249435	0.559601	0.127091	0.140881	0.123158	TRUE	FALSE	TRUE	TRUE	464.26	524.43	6.03	6.21	0	0	1.13	66.03	18.25	0	1.9	22.7
14:44:46	1179.46	1103.02	87.3648	0	0	0	393.149	120.301	251.177	0.293539	0.230807	-9.04e-05	0.00429514	0.00316484	0.00515417	0.249164	0.559375	0.127272	0.140655	0.122977	TRUE	FALSE	TRUE	TRUE	464.26	524.43	6.03	6.21	0	0	1.13	66.03	18.25	0	1.9	22.7
14:44:47	1179.46	1092.1	98.2856	0	0	0	393.149	131.222	262.098	0.293313	0.230468	-0.000180848	0.00440817	0.00316484	0.00492811	0.249661	0.559375	0.127362	0.140248	0.123836	TRUE	FALSE	TRUE	TRUE	460.81	524.43	6.03	6.21	0	0	1.13	66.05	18.25	0	1.9	22.7
14:44:48	1168.54	1092.1	98.2856	0	0	0	393.149	131.222	251.177	0.2932	0.230468	0	0.00429514	0.00327787	0.00533502	0.249435	0.558878	0.127543	0.140022	0.124424	TRUE	FALSE	TRUE	TRUE	460.81	524.43	5.99	6.21	0	0	1.13	66.05	18.25	0	1.9	22.7
14:44:49	1179.46	1103.02	87.3648	0	0	0	382.228	120.301	262.098	0.2932	0.230468	-4.52e-05	0.00429514	0.00316484	0.00501854	0.249344	0.558697	0.127453	0.139931	0.123745	TRUE	FALSE	TRUE	TRUE	459.1	524.43	5.99	6.21	0	0	1.13	66.07	18.25	0	1.9	22.7
14:44:50	1179.46	1092.1	98.2856	0	0	0	393.149	131.222	251.177	0.293313	0.230581	-4.52e-05	0.00429514	0.00327787	0.00501854	0.249435	0.55829	0.127453	0.139434	0.124695	TRUE	FALSE	TRUE	TRUE	459.1	524.43	5.99	6.21	0	0	1.13	66.07	18.25	0	1.9	22.7
14:44:51	1179.46	1092.1	98.2856	0	0	0	393.149	131.222	251.177	0.293313	0.230468	-9.04e-05	0.00440817	0.00316484	0.00538023	0.250113	0.557747	0.128131	0.138304	0.124243	TRUE	FALSE	TRUE	TRUE	457.98	524.43	5.99	6.21	0	0	1.13	66.07	18.25	0	1.9	22.7
14:44:52	1179.46	1092.1	87.3648	0	0	0	393.149	120.301	262.098	0.293426	0.230807	0	0.00429514	0.00327787	0.00470205	0.249073	0.557657	0.12795	0.13853	0.124424	TRUE	FALSE	TRUE	TRUE	457.98	524.43	5.98	6.21	0	0	1.13	66.07	18.25	0	1.9	22.7
14:44:53	1179.46	1092.1	98.2856	0	0	0	393.149	131.222	262.098	0.293426	0.230694	0.000135636	0.00429514	0.00305181	0.00497332	0.249706	0.55725	0.12795	0.137761	0.125554	TRUE	FALSE	TRUE	TRUE	456.68	524.43	5.98	6.21	0	0	1.14	66.07	18.25	0	1.9	22.7
14:44:54	1179.46	1103.02	98.2856	0	0	0	393.149	131.222	251.177	0.293426	0.230694	0.000180848	0.00429514	0.00327787	0.00519938	0.249435	0.556798	0.12786	0.137626	0.125418	TRUE	FALSE	TRUE	TRUE	456.68	524.43	5.97	6.21	0	0	1.14	66.07	18.25	0	1.9	22.8
14:44:55	1168.54	1092.1	98.2856	0	0	0	393.149	120.301	251.177	0.293426	0.230468	-0.000135636	0.00429514	0.0033909	0.00506375	0.249842	0.556753	0.128131	0.137264	0.125418	TRUE	FALSE	TRUE	TRUE	456.68	524.43	5.97	6.21	0	0	1.14	66.07	18.25	0	1.9	22.8
14:44:56	1179.46	1092.1	87.3648	0	0	0	393.149	131.222	262.098	0.293313	0.230355	0	0.00429514	0.00293878	0.00506375	0.249254	0.556662	0.128267	0.137083	0.126142	TRUE	FALSE	TRUE	TRUE	456.68	524.43	5.97	6.21	0	0	1.14	66.07	18.25	0	1.9	22.8
14:44:57	1179.46	1103.02	98.2856	0	0	0	382.228	131.222	262.098	0.293313	0.230355	-0.00022606	0.00429514	0.00305181	0.00501854	0.249571	0.555939	0.128312	0.136314	0.125418	TRUE	FALSE	TRUE	TRUE	456.68	520.88	5.97	6.21	0	0	1.14	66.07	18.25	0	1.87	22.8
14:44:58	1179.46	1092.1	98.2856	0	0	0	393.149	120.301	251.177	0.293426	0.230807	-0.00022606	0.00429514	0.00305181	0.0052446	0.24948	0.556165	0.128583	0.13532	0.126277	TRUE	FALSE	TRUE	TRUE	456.68	520.88	5.97	6.21	0	0	1.14	66.07	18.25	0	1.87	22.8
14:44:59	1179.46	1092.1	87.3648	0	0	0	393.149	131.222	262.098	0.293313	0.230581	0	0.00418211	0.00327787	0.00533502	0.249706	0.555487	0.128945	0.134913	0.126775	TRUE	FALSE	TRUE	TRUE	456.68	520.58	5.97	6.21	0	0	1.14	66.07	18.25	0	1.9	22.8
14:45:00	1179.46	1092.1	98.2856	0	0	0	393.149	120.301	251.177	0.293313	0.230468	-9.04e-05	0.00429514	0.00327787	0.00492811	0.249661	0.555396	0.128583	0.134687	0.12682	TRUE	FALSE	TRUE	TRUE	456.68	520.58	5.97	6.21	0	0	1.14	66.07	18.25	0	1.9	22.8
14:45:01	1168.54	1092.1	98.2856	0	0	0	393.149	131.222	262.098	0.2932	0.230242	-4.52e-05	0.00429514	0.00305181	0.00506375	0.249751	0.555125	0.128764	0.134099	0.126775	TRUE	FALSE	TRUE	TRUE	456.68	520.58	5.97	6.21	0	0	1.14	66.07	18.25	0	1.89	22.8
14:45:02	1179.46	1103.02	87.3648	0	0	0	393.149	131.222	251.177	0.292974	0.230355	-4.52e-05	0.00429514	0.0033909	0.00528981	0.250294	0.554854	0.128945	0.133873	0.127091	TRUE	FALSE	TRUE	TRUE	456.68	520.12	5.97	6.21	0	0	1.14	66.07	18.25	0	1.89	22.8
14:45:03	1179.46	1092.1	98.2856	0	0	0	393.149	120.301	262.098	0.293313	0.230581	-0.00022606	0.00440817	0.0033909	0.00519938	0.249661	0.554131	0.128945	0.13324	0.126594	TRUE	FALSE	TRUE	TRUE	456.68	520.12	5.97	6.21	0	0	1.14	66.51	18.25	0	1.87	22.8
14:45:04	1179.46	1092.1	98.2856	0	0	0	393.149	131.222	251.177	0.2932	0.230468	-9.04e-05	0.00440817	0.00316484	0.00515417	0.248757	0.554221	0.12899	0.133466	0.127724	TRUE	FALSE	TRUE	TRUE	456.68	519.74	5.97	6.21	0	0	1.14	66.51	18.25	0	1.87	22.8
14:45:05	1179.46	1092.1	98.2856	0	0	0	393.149	120.301	262.098	0.293087	0.230468	-4.52e-05	0.00440817	0.00327787	0.00533502	0.249797	0.553452	0.129397	0.132245	0.128267	TRUE	FALSE	TRUE	TRUE	456.68	519.74	5.97	6.21	0	0	1.14	66.56	18.25	0	1.87	22.8
14:45:06	1179.46	1103.02	87.3648	0	0	0	393.149	131.222	262.098	0.293426	0.230242	-0.000180848	0.00440817	0.00316484	0.00510896	0.248892	0.553905	0.129261	0.131703	0.128402	TRUE	FALSE	TRUE	TRUE	456.68	519.74	5.97	6.21	0	0	1.14	66.56	18.25	0	1.87	22.7
14:45:07	1168.54	1092.1	98.2856	0	0	0	393.149	131.222	251.177	0.293313	0.230581	-0.000180848	0.00440817	0.0033909	0.00492811	0.249797	0.553091	0.129442	0.131431	0.128267	TRUE	FALSE	TRUE	TRUE	456.68	519.74	5.97	6.21	0	0	1.14	66.66	18.25	3.61	1.87	22.7
14:45:08	1179.46	1092.1	98.2856	0	0	0	393.149	120.301	251.177	0.2932	0.230242	-0.000135636	0.00429514	0.00327787	0.00538023	0.249887	0.552503	0.129623	0.131431	0.128764	TRUE	FALSE	TRUE	TRUE	455.58	519.74	5.94	6.21	0	0	1.14	66.66	18.25	3.61	1.87	22.7
14:45:09	1190.38	1092.1	87.3648	0	0	0	393.149	131.222	262.098	0.2932	0.230355	-9.04e-05	0.00440817	0.00316484	0.00501854	0.250701	0.552684	0.129623	0.130798	0.128538	TRUE	FALSE	TRUE	TRUE	455.58	519.74	5.94	6.21	0	0	1.14	66.65	18.25	3.88	1.87	22.7
14:45:10	1179.46	1092.1	98.2856	0	0	0	393.149	120.301	251.177	0.293539	0.230581	4.52e-05	0.00429514	0.00305181	0.00547066	0.250475	0.552277	0.129894	0.130618	0.12899	TRUE	FALSE	TRUE	TRUE	455.23	519.74	5.92	6.21	0	0	1.14	66.65	18.25	3.88	1.87	22.7
14:45:11	1179.46	1103.02	98.2856	0	0	0	393.149	131.222	262.098	0.293313	0.230468	-0.00022606	0.00440817	0.00316484	0.00470205	0.249887	0.552006	0.129713	0.129894	0.129306	TRUE	FALSE	TRUE	TRUE	455.42	519.74	5.92	6.21	0	0	1.14	66.65	18.25	4.21	1.87	22.7
14:45:12	1179.46	1092.1	87.3648	0	0	0	382.228	120.301	251.177	0.293313	0.230242	-0.00022606	0.00452121	0.00305181	0.00506375	0.249028	0.551418	0.129985	0.129985	0.129668	TRUE	FALSE	TRUE	TRUE	455.42	519.74	5.92	6.21	0	0	1.14	66.65	18.25	4.21	1.87	22.7
14:45:13	1168.54	1092.1	98.2856	0	0	0	393.149	120.301	262.098	0.293087	0.230355	-0.000180848	0.00440817	0.0033909	0.00492811	0.249073	0.551599	0.130165	0.129261	0.129306	TRUE	FALSE	TRUE	TRUE	455.65	519.74	5.92	6.21	0	0	1.13	66.65	18.25	4.28	1.87	22.7
14:45:14	1190.38	1092.1	98.2856	0	0	0	393.149	131.222	251.177	0.2932	0.230468	0	0.00429514	0.00327787	0.00519938	0.249028	0.550694	0.130301	0.128764	0.130527	TRUE	FALSE	TRUE	TRUE	455.65	519.74	5.92	6.21	0	0	1.13	66.65	18.25	4.28	1.87	22.7
14:45:15	1168.54	1092.1	98.2856	0	0	0	393.149	131.222	262.098	0.293087	0.230355	-9.04e-05	0.00440817	0.0033909	0.00497332	0.249706	0.550694	0.130391	0.128538	0.130618	TRUE	FALSE	TRUE	TRUE	455.65	519.74	5.92	6.21	0	0	1.13	66.65	18.25	4.28	1.87	22.7
14:45:16	1179.46	1092.1	87.3648	0	0	0	393.149	120.301	251.177	0.2932	0.230355	-0.000406908	0.00440817	0.00316484	0.00519938	0.248757	0.550559	0.130572	0.128176	0.13012	TRUE	FALSE	TRUE	TRUE	455.65	519.74	5.92	6.21	0	0	1.13	66.65	18.25	4.28	1.87	22.7
14:45:17	1179.46	1092.1	98.2856	0	0	0	393.149	131.222	262.098	0.293087	0.230468	-0.000180848	0.00429514	0.00316484	0.00506375	0.249118	0.550514	0.130256	0.128221	0.130798	TRUE	FALSE	TRUE	TRUE	455.65	519.74	5.92	6.21	0	0	1.13	66.65	18.25	4.28	1.87	22.7
14:45:18	1179.46	1092.1	98.2856	0	0	0	393.149	131.222	251.177	0.293087	0.230242	-0.00022606	0.00429514	0.00327787	0.00461163	0.248531	0.550061	0.130482	0.127408	0.130934	TRUE	FALSE	TRUE	TRUE	455.65	518.53	5.92	6.21	0	0	1.13	66.65	18.25	4.28	1.87	22.7
14:45:19	1179.46	1103.02	87.3648	0	0	0	382.228	120.301	262.098	0.293426	0.230468	-9.04e-05	0.00440817	0.00316484	0.00465684	0.248531	0.549428	0.130572	0.127182	0.132019	TRUE	FALSE	TRUE	TRUE	455.65	518.53	5.92	6.21	0	0	1.14	66.65	18.25	4.28	1.9	22.7
14:45:20	1179.46	1092.1	98.2856	0	0	0	393.149	131.222	251.177	0.2932	0.230242	-0.00022606	0.00440817	0.00316484	0.00528981	0.249797	0.549383	0.130572	0.126639	0.131431	TRUE	FALSE	TRUE	TRUE	455.65	518.09	5.92	6.21	0	0	1.14	66.65	18.25	4.28	1.9	22.7
14:45:21	1179.46	1092.1	98.2856	0	0	0	393.149	131.222	262.098	0.293087	0.230016	-4.52e-05	0.00440817	0.00327787	0.00515417	0.249977	0.548976	0.130572	0.126277	0.131703	TRUE	FALSE	TRUE	TRUE	455.65	518.09	5.92	6.21	0	0	1.14	66.65	18.25	4.28	1.87	22.7
14:45:22	1179.46	1092.1	87.3648	0	0	0	393.149	120.301	251.177	0.292974	0.230355	-4.52e-05	0.00440817	0.00327787	0.00510896	0.250023	0.548931	0.130844	0.126142	0.132517	TRUE	FALSE	TRUE	TRUE	455.65	517.84	5.92	6.21	0	0	1.14	66.65	18.25	4.28	1.87	22.7
14:45:23	1179.46	1092.1	98.2856	0	0	0	393.149	120.301	262.098	0.293087	0.230242	-4.52e-05	0.00429514	0.00327787	0.00497332	0.249797	0.548389	0.131251	0.125599	0.131748	TRUE	FALSE	TRUE	TRUE	455.65	517.84	5.92	6.21	0	0	1.14	67.01	18.25	4.28	1.9	22.7
14:45:24	1179.46	1092.1	98.2856	0	0	0	393.149	131.222	251.177	0.293426	0.230581	0	0.00440817	0.00316484	0.00515417	0.248802	0.548208	0.131431	0.125328	0.132969	TRUE	FALSE	TRUE	TRUE	455.65	517.38	5.92	6.21	0	0	1.14	67.01	18.25	4.28	1.9	22.8
14:45:25	1179.46	1092.1	98.2856	0	0	0	393.149	131.222	262.098	0.293539	0.230468	-0.000180848	0.00440817	0.00316484	0.00465684	0.249254	0.548072	0.131386	0.124785	0.132923	TRUE	FALSE	TRUE	TRUE	455.65	517.38	5.92	6.22	0	0	1.14	67.07	18.25	4.28	1.9	22.8
14:45:26	1179.46	1103.02	87.3648	0	0	0	393.149	131.222	251.177	0.293313	0.230581	-0.000316484	0.00452121	0.0033909	0.00483769	0.249209	0.547575	0.131341	0.12465	0.133195	TRUE	FALSE	TRUE	TRUE	455.65	517.38	5.92	6.22	0	0	1.14	67.07	18.25	4.28	1.9	22.8
14:45:27	1179.46	1092.1	98.2856	0	0	0	393.149	131.222	262.098	0.293087	0.230242	-0.000180848	0.00429514	0.00316484	0.00528981	0.248983	0.54762	0.131522	0.124243	0.134189	TRUE	FALSE	TRUE	TRUE	455.65	517.38	5.92	6.22	0	0	1.14	67.01	18.25	5.03	1.9	22.8
14:45:28	1179.46	1092.1	98.2856	0	0	0	393.149	120.301	251.177	0.293087	0.230242	-9.04e-05	0.00429514	0.00350393	0.00497332	0.249751	0.546897	0.131793	0.123745	0.134009	TRUE	FALSE	TRUE	TRUE	453.71	517.38	5.89	6.22	0	0	1.14	67.01	18.25	5.03	1.9	22.8
14:45:29	1179.46	1092.1	87.3648	0	0	0	393.149	131.222	262.098	0.2932	0.230355	-0.00045212	0.00440817	0.0033909	0.0052446	0.249616	0.546671	0.131883	0.123339	0.134144	TRUE	FALSE	TRUE	TRUE	453.71	517.38	5.89	6.22	0	0	1.14	67.13	18.25	5.17	1.9	22.8
14:45:30	1179.46	1092.1	98.2856	0	0	0	382.228	131.222	251.177	0.293313	0.230468	-0.000406908	0.00429514	0.00327787	0.00542545	0.249706	0.54649	0.131658	0.123293	0.134235	TRUE	FALSE	TRUE	TRUE	454.15	517.38	5.89	6.22	0	0	1.14	67.13	18.25	5.17	1.9	22.8
14:45:31	1179.46	1092.1	98.2856	0	0	0	393.149	131.222	262.098	0.293313	0.230468	-0.000180848	0.00440817	0.0033909	0.00483769	0.248983	0.546128	0.132064	0.12266	0.134009	TRUE	FALSE	TRUE	TRUE	454.15	517.38	5.88	6.22	0	0	1.14	67.13	18.25	5.27	1.9	22.8
14:45:32	1179.46	1092.1	98.2856	0	0	0	393.149	120.301	251.177	0.2932	0.230468	-0.000361696	0.00440817	0.00327787	0.00461163	0.248892	0.545902	0.131838	0.122253	0.135094	TRUE	FALSE	TRUE	TRUE	455.61	517.38	5.88	6.22	0	0	1.14	67.13	18.25	5.27	1.9	22.8
14:45:33	1179.46	1103.02	87.3648	0	0	0	393.149	131.222	262.098	0.293652	0.230468	-9.04e-05	0.00429514	0.00305181	0.00506375	0.249571	0.545812	0.131974	0.122027	0.135772	TRUE	FALSE	TRUE	TRUE	455.61	517.38	5.88	6.22	0	0	1.13	67.13	18.25	5.65	1.9	22.8
14:45:34	1179.46	1092.1	98.2856	0	0	0	393.149	131.222	251.177	0.293539	0.231034	-0.00022606	0.00440817	0.0033909	0.00501854	0.249616	0.545269	0.132381	0.12144	0.135094	TRUE	FALSE	TRUE	TRUE	455.65	517.38	5.88	6.22	0	0	1.13	67.13	18.25	5.65	1.9	22.8
14:45:35	1179.46	1092.1	98.2856	0	0	0	393.149	131.222	251.177	0.293426	0.230581	-0.000361696	0.00440817	0.0033909	0.00461163	0.250023	0.544998	0.132426	0.121304	0.136179	TRUE	FALSE	TRUE	TRUE	455.65	517.38	5.88	6.22	0	0	1.14	67.13	18.25	5.65	1.9	22.8
14:45:36	1179.46	1092.1	98.2856	0	0	0	393.149	120.301	262.098	0.293087	0.230355	-0.000542545	0.00440817	0.00305181	0.0048829	0.249525	0.544546	0.13229	0.120716	0.135681	TRUE	FALSE	TRUE	TRUE	455.65	517.38	5.88	6.22	0	0	1.14	67.13	18.25	5.65	1.9	22.8
14:45:37	1179.46	1103.02	87.3648	0	0	0	382.228	131.222	251.177	0.292974	0.230129	-0.00022606	0.00440817	0.0033909	0.00515417	0.249525	0.543958	0.132426	0.120309	0.136631	TRUE	FALSE	TRUE	TRUE	455.65	517.38	5.88	6.22	0	0	1.14	67.13	18.25	5.65	1.9	22.7
14:45:38	1179.46	1092.1	98.2856	0	0	0	393.149	131.222	262.098	0.2932	0.230355	-0.000135636	0.00418211	0.00316484	0.00497332	0.250339	0.543687	0.132923	0.120083	0.136631	TRUE	FALSE	TRUE	TRUE	455.65	515.31	5.88	6.22	0	0	1.14	67.13	18.25	5.65	1.9	22.7
14:45:39	1179.46	1092.1	98.2856	0	0	0	393.149	120.301	251.177	0.293087	0.230016	-0.000135636	0.00418211	0.0033909	0.0048829	0.249525	0.54328	0.132743	0.119857	0.137128	TRUE	FALSE	TRUE	TRUE	455.65	515.31	5.88	6.22	0	0	1.14	67.13	18.25	5.65	1.89	22.7
14:45:40	1179.46	1092.1	87.3648	0	0	0	393.149	131.222	262.098	0.2932	0.230468	-0.000406908	0.00440817	0.0033909	0.0048829	0.24948	0.543325	0.133014	0.119405	0.138439	TRUE	FALSE	TRUE	TRUE	455.65	514.03	5.88	6.22	0	0	1.14	67.13	18.25	5.65	1.89	22.7
14:45:41	1179.46	1092.1	98.2856	0	0	0	393.149	131.222	251.177	0.293313	0.230581	-0.000180848	0.00429514	0.00305181	0.00506375	0.249661	0.542692	0.132833	0.119134	0.138304	TRUE	FALSE	TRUE	TRUE	455.65	514.03	5.88	6.21	0	0	1.14	67.13	18.25	5.65	1.89	22.8
14:45:42	1179.46	1092.1	98.2856	0	0	0	393.149	131.222	262.098	0.293652	0.230807	-0.000135636	0.00429514	0.00316484	0.00461163	0.249435	0.542511	0.132878	0.118727	0.137897	TRUE	FALSE	TRUE	TRUE	455.65	513.65	5.88	6.21	0	0	1.14	67.13	18.25	5.65	1.89	22.9
14:45:43	1190.38	1092.1	98.2856	0	0	0	382.228	120.301	251.177	0.293313	0.230355	-0.000316484	0.00440817	0.00327787	0.0048829	0.249525	0.541923	0.133376	0.11823	0.138485	TRUE	FALSE	TRUE	TRUE	455.65	513.65	5.88	6.21	0	0	1.14	67.47	18.25	5.65	1.89	22.9
14:45:44	1179.46	1103.02	87.3648	0	0	0	393.149	131.222	262.098	0.293313	0.230468	0	0.00440817	0.0033909	0.00519938	0.248485	0.541562	0.133466	0.118003	0.138665	TRUE	FALSE	TRUE	TRUE	455.65	512.35	5.88	6.21	0	0	1.14	67.47	18.25	5.65	1.89	22.8
14:45:45	1179.46	1081.17	98.2856	0	0	0	393.149	131.222	251.177	0.292974	0.230242	-0.000316484	0.00429514	0.00316484	0.00528981	0.24939	0.541245	0.134054	0.117777	0.138982	TRUE	FALSE	TRUE	TRUE	455.65	512.35	5.88	6.21	0	0	1.14	67.6	18.25	5.65	1.89	22.9
14:45:46	1179.46	1103.02	98.2856	0	0	0	393.149	131.222	262.098	0.293313	0.230581	-0.000316484	0.00440817	0.00327787	0.00519938	0.249525	0.540838	0.133692	0.117325	0.139118	TRUE	FALSE	TRUE	TRUE	455.65	512.35	5.88	6.21	0	0	1.14	67.6	18.25	5.65	1.89	22.8
14:45:47	1179.46	1092.1	87.3648	0	0	0	393.149	120.301	251.177	0.2932	0.230581	-0.000180848	0.00440817	0.0033909	0.00533502	0.249932	0.540477	0.133647	0.117099	0.139705	TRUE	FALSE	TRUE	TRUE	455.65	512.35	5.88	6.21	0	0	1.14	67.66	18.25	6.15	1.89	22.8
14:45:48	1179.46	1092.1	98.2856	0	0	0	393.149	131.222	262.098	0.2932	0.230468	-0.00022606	0.00429514	0.00305181	0.00538023	0.249435	0.540024	0.133692	0.116285	0.140564	TRUE	FALSE	TRUE	TRUE	455.31	512.35	5.88	6.21	0	0	1.14	67.66	18.25	6.15	1.89	22.8
14:45:49	1179.46	1092.1	98.2856	0	0	0	393.149	131.222	251.177	0.2932	0.230355	-0.000316484	0.00429514	0.00316484	0.00492811	0.249118	0.539617	0.134235	0.116014	0.140022	TRUE	FALSE	TRUE	TRUE	455.31	512.35	5.87	6.21	0	0	1.14	67.64	18.25	6.13	1.89	22.8
14:45:50	1179.46	1092.1	98.2856	0	0	0	393.149	131.222	262.098	0.293313	0.230468	-0.000271272	0.00440817	0.0033909	0.00501854	0.248892	0.539527	0.134596	0.115743	0.140564	TRUE	FALSE	TRUE	TRUE	455.74	512.35	5.87	6.21	0	0	1.14	67.64	18.25	6.13	1.89	22.7
14:45:51	1179.46	1092.1	87.3648	0	0	0	393.149	120.301	251.177	0.293539	0.230581	-0.000316484	0.00440817	0.00350393	0.00533502	0.249028	0.539211	0.13437	0.115517	0.140836	TRUE	FALSE	TRUE	TRUE	455.74	512.35	5.86	6.21	0	0	1.14	67.64	18.25	6.12	1.89	22.7
14:45:52	1179.46	1092.1	98.2856	0	0	0	393.149	131.222	262.098	0.293426	0.230581	-0.000361696	0.00429514	0.0033909	0.00497332	0.248802	0.538894	0.134551	0.1152	0.141062	TRUE	FALSE	TRUE	TRUE	456.51	512.35	5.86	6.21	0	0	1.14	67.64	18.25	6.12	1.89	22.7
14:45:53	1179.46	1103.02	98.2856	0	0	0	382.228	131.222	251.177	0.293313	0.230581	-0.00022606	0.00440817	0.0033909	0.00501854	0.248983	0.538759	0.135094	0.114613	0.14079	TRUE	FALSE	TRUE	TRUE	456.51	512.35	5.86	6.21	0	0	1.13	67.64	18.25	6.15	1.89	22.7
14:45:54	1179.46	1092.1	98.2856	0	0	0	393.149	120.301	262.098	0.2932	0.230355	-9.04e-05	0.00429514	0.00316484	0.00456642	0.248169	0.538442	0.134868	0.114522	0.141378	TRUE	FALSE	TRUE	TRUE	456.61	512.35	5.86	6.21	0	0	1.13	67.64	18.25	6.15	1.89	22.7
14:45:55	1179.46	1092.1	87.3648	0	0	0	393.149	131.222	251.177	0.293426	0.230355	-0.000316484	0.00429514	0.00316484	0.00497332	0.249842	0.538126	0.135229	0.113934	0.140157	TRUE	FALSE	TRUE	TRUE	456.61	512.35	5.84	6.21	0	0	1.14	67.64	18.25	6.15	1.89	22.7
14:45:56	1179.46	1092.1	98.2856	0	0	0	393.149	131.222	262.098	0.293087	0.230242	-0.00022606	0.00440817	0.00316484	0.00461163	0.249073	0.537764	0.135229	0.113618	0.141649	TRUE	FALSE	TRUE	TRUE	456.61	512.35	5.84	6.21	0	0	1.14	67.64	18.25	6.15	1.89	22.7
14:45:57	1179.46	1092.1	98.2856	0	0	0	393.149	120.301	251.177	0.293087	0.230468	-0.000406908	0.00440817	0.0033909	0.0052446	0.250158	0.537628	0.135772	0.113075	0.141921	TRUE	FALSE	TRUE	TRUE	456.61	512.35	5.84	6.21	0	0	1.14	67.64	18.25	6.15	0.49	22.7
14:45:58	1179.46	1092.1	87.3648	0	0	0	393.149	131.222	262.098	0.293087	0.230355	-0.00045212	0.00440817	0.00327787	0.00538023	0.249209	0.537357	0.135681	0.112759	0.142373	TRUE	FALSE	TRUE	TRUE	456.61	512.51	5.84	6.21	0	0	1.14	67.64	18.25	6.15	0.49	22.7
14:45:59	1179.46	1092.1	98.2856	0	0	0	393.149	120.301	251.177	0.293087	0.230129	-0.000316484	0.00429514	0.00305181	0.00510896	0.248847	0.53695	0.136405	0.112578	0.14287	TRUE	FALSE	TRUE	TRUE	456.61	512.51	5.84	6.22	0	0	1.14	67.64	18.25	6.15	0.27	22.7
14:46:00	1179.46	1103.02	98.2856	0	0	0	393.149	131.222	262.098	0.2932	0.230355	-0.000271272	0.00429514	0.00327787	0.00470205	0.249209	0.53686	0.135681	0.112035	0.143141	TRUE	FALSE	TRUE	TRUE	456.61	512.18	5.84	6.22	0	0	1.14	67.64	18.25	6.15	0.27	22.7
14:46:01	1168.54	1092.1	98.2856	0	0	0	393.149	120.301	251.177	0.293087	0.230355	-0.00022606	0.00429514	0.00316484	0.00447599	0.249435	0.536453	0.135998	0.111583	0.143186	TRUE	FALSE	TRUE	TRUE	456.61	512.18	5.84	6.22	0	0	1.14	67.64	18.25	6.15	0.22	22.7
14:46:02	1179.46	1092.1	87.3648	0	0	0	393.149	131.222	262.098	0.293087	0.230242	-0.000497333	0.00440817	0.00327787	0.00429514	0.248757	0.536091	0.136314	0.111267	0.143413	TRUE	FALSE	TRUE	TRUE	456.61	511.93	5.84	6.22	0	0	1.14	67.64	18.25	6.15	0.22	22.7
14:46:03	1179.46	1092.1	98.2856	0	0	0	382.228	131.222	251.177	0.293087	0.230468	-0.000406908	0.00440817	0.00327787	0.0048829	0.248576	0.536679	0.136631	0.111086	0.141695	TRUE	FALSE	TRUE	TRUE	456.61	511.93	5.84	6.22	0	0	1.14	68.13	18.25	6.15	0.07	22.7
14:46:04	1179.46	1092.1	98.2856	0	0	0	393.149	120.301	262.098	0.292974	0.230242	-0.00022606	0.00429514	0.0033909	0.00452121	0.249616	0.537628	0.13749	0.111041	0.138711	TRUE	FALSE	TRUE	TRUE	456.61	511.59	5.84	6.22	0	0	1.14	68.13	18.25	6.15	0.07	22.7
14:46:05	1179.46	1092.1	98.2856	0	0	0	393.149	131.222	251.177	0.293087	0.230242	-0.000497333	0.0321005	0.00531242	0.0052446	0.249977	0.535006	0.136314	0.110905	0.136088	TRUE	TRUE	TRUE	TRUE	456.61	511.59	5.84	6.21	0	0	1.14	68.15	18.25	6.15	0.07	22.7
14:46:06	1179.46	1092.1	87.3648	371.307	21.8408	120.127	393.149	131.222	262.098	0.293991	0.231034	-0.000497333	0.0914414	0.0523329	0.00497332	0.249209	0.536633	0.135772	0.109639	0.134099	TRUE	TRUE	TRUE	TRUE	456.61	511.59	5.84	6.21	0	0	1.14	68.15	18.25	6.15	0.07	22.8
14:46:07	1179.46	1092.1	98.2856	666.174	185.652	152.889	393.149	120.301	251.177	0.293539	0.230468	-0.000361696	0.174518	0.139366	0.00479248	0.248892	0.536905	0.135546	0.109413	0.133059	TRUE	TRUE	TRUE	TRUE	456.61	511.59	5.84	6.21	0	0	1.14	68.15	18.25	6.23	0.07	22.9
14:46:08	1179.46	1103.02	98.2856	655.253	349.465	98.2856	393.149	131.222	251.177	0.2932	0.230355	-0.000180848	0.249797	0.211253	0.00515417	0.250023	0.537357	0.134415	0.108825	0.131115	TRUE	TRUE	TRUE	TRUE	429.56	511.59	5.84	6.21	0	0	1.14	68.17	18.25	6.23	0.07	23
14:46:09	1179.46	1092.1	98.2856	611.568	436.833	98.2856	393.149	131.222	262.098	0.2932	0.230355	-0.000361696	0.281558	0.247762	0.00510896	0.24948	0.538532	0.134144	0.10878	0.13003	TRUE	TRUE	TRUE	TRUE	429.56	511.59	5.83	6.21	0	0	1.14	68.17	18.25	6.17	0.07	23
14:46:10	1179.46	1092.1	87.3648	611.568	491.438	98.2856	382.228	120.301	251.177	0.293087	0.230242	-0.000406908	0.290826	0.256917	0.00506375	0.249344	0.538623	0.133104	0.108554	0.129306	TRUE	TRUE	TRUE	TRUE	429.25	511.59	5.83	6.21	0	1.35	1.14	68.37	18.25	6.17	0.07	23
14:46:11	1179.46	1092.1	98.2856	589.727	502.359	87.3648	393.149	131.222	262.098	0.292861	0.230242	-0.000271272	0.293539	0.259517	0.00492811	0.248938	0.537945	0.132652	0.107966	0.128357	TRUE	TRUE	TRUE	TRUE	429.25	511.59	5.83	6.21	0	1.35	1.14	68.37	18.25	6.23	0.07	23
14:46:12	1179.46	1092.1	98.2856	600.648	491.438	98.2856	393.149	131.222	251.177	0.292861	0.229903	-0.000180848	0.293991	0.260195	0.00492811	0.249164	0.53912	0.13229	0.10765	0.126865	TRUE	TRUE	TRUE	TRUE	435.63	511.59	5.83	6.21	0	2.78	1.14	68.37	18.25	6.23	0.07	23
14:46:13	1168.54	1103.02	98.2856	589.727	513.28	87.3648	393.149	120.301	262.098	0.292974	0.230016	-0.000135636	0.293991	0.260308	0.00515417	0.248802	0.538759	0.131838	0.107333	0.126187	TRUE	TRUE	TRUE	TRUE	435.63	511.59	5.83	6.21	0	2.78	1.14	68.37	18.25	6.19	0.07	23
14:46:14	1179.46	1092.1	87.3648	600.648	502.359	98.2856	393.149	131.222	251.177	0.292748	0.230129	-0.000271272	0.294104	0.260308	0.00501854	0.250294	0.538532	0.131296	0.107152	0.126051	TRUE	TRUE	TRUE	TRUE	440.1	511.59	5.83	6.21	0	2.78	1.13	68.37	18.25	6.19	0.07	23
14:46:15	1179.46	1092.1	98.2856	589.727	502.359	87.3648	393.149	131.222	262.098	0.292974	0.230355	-0.000361696	0.293991	0.260308	0.00470205	0.248305	0.540929	0.13116	0.106881	0.123791	TRUE	TRUE	TRUE	TRUE	440.1	511.59	5.82	6.21	0	2.78	1.13	68.37	18.25	6.19	0.07	23
14:46:16	1179.46	1092.1	98.2856	600.648	502.359	87.3648	393.149	120.301	262.098	0.292974	0.230242	-0.000361696	0.293765	0.260195	0.00452121	0.24939	0.541019	0.130844	0.106429	0.122525	TRUE	TRUE	TRUE	TRUE	440.1	511.59	5.82	6.21	0	2.78	1.14	68.37	18.25	6.19	0.07	23
14:46:17	1179.46	1092.1	98.2856	589.727	502.359	98.2856	393.149	131.222	251.177	0.293313	0.230807	-9.04e-05	0.293652	0.260082	0.00492811	0.249118	0.539437	0.130391	0.105977	0.122073	TRUE	TRUE	TRUE	TRUE	440.1	511.59	5.82	6.21	0	2.78	1.14	68.37	18.25	6.19	0.07	23
14:46:18	1179.46	1092.1	87.3648	600.648	513.28	87.3648	382.228	131.222	262.098	0.293539	0.230807	-0.000271272	0.293878	0.259969	0.00506375	0.249344	0.542601	0.130075	0.105841	0.120355	TRUE	TRUE	TRUE	TRUE	440.1	507.32	5.82	6.21	6.56	2.78	1.13	68.37	18.25	6.19	0	22.9
14:46:19	1179.46	1092.1	98.2856	589.727	502.359	87.3648	393.149	120.301	251.177	0.2932	0.230468	-0.000361696	0.293765	0.260195	0.00492811	0.249299	0.542375	0.129306	0.105435	0.120219	TRUE	TRUE	TRUE	TRUE	440.1	507.32	5.82	6.28	6.56	2.78	1.13	68.37	18.25	6.19	0	22.9
14:46:20	1179.46	1103.02	98.2856	600.648	502.359	98.2856	393.149	131.222	262.098	0.292974	0.230355	-0.000135636	0.293765	0.259856	0.00479248	0.24835	0.544094	0.129487	0.105344	0.118184	TRUE	TRUE	TRUE	TRUE	440.1	507.01	5.82	6.28	6.56	2.78	1.14	68.37	18.25	6.19	0	22.9
14:46:21	1179.46	1092.1	98.2856	589.727	502.359	87.3648	393.149	131.222	251.177	0.292861	0.230016	-0.00022606	0.293652	0.259969	0.0048829	0.249706	0.54224	0.128945	0.104937	0.117009	TRUE	TRUE	TRUE	TRUE	440.1	507.01	5.82	6.28	6.56	2.78	1.14	68.37	18.25	6.19	0	22.9
14:46:22	1168.54	1092.1	87.3648	600.648	513.28	87.3648	393.149	120.301	262.098	0.292861	0.230129	-0.000406908	0.293765	0.260082	0.00479248	0.249118	0.54432	0.128131	0.104892	0.117099	TRUE	TRUE	TRUE	TRUE	440.1	506.65	5.82	6.28	6.57	2.78	1.14	68.37	18.25	6.19	0	22.9
14:46:23	1179.46	1092.1	98.2856	589.727	502.359	98.2856	393.149	131.222	251.177	0.292748	0.229903	-0.000135636	0.293652	0.259856	0.00456642	0.249299	0.543415	0.127995	0.10453	0.115878	TRUE	TRUE	TRUE	TRUE	440.1	506.65	5.82	6.28	6.57	2.78	1.14	68.37	18.25	6.19	0	23
14:46:24	1179.46	1092.1	98.2856	589.727	502.359	87.3648	382.228	131.222	251.177	0.292635	0.229903	-0.000361696	0.293652	0.259969	0.0048829	0.24939	0.54224	0.126051	0.103536	0.115878	TRUE	TRUE	TRUE	TRUE	440.1	505.45	5.82	6.28	6.57	2.78	1.14	68.69	18.25	6.19	0	23
14:46:25	1179.46	1103.02	98.2856	600.648	513.28	87.3648	393.149	120.301	262.098	0.293652	0.230807	-0.000135636	0.293652	0.259969	0.00528981	0.249164	0.549112	0.126639	0.103581	0.113934	TRUE	TRUE	TRUE	TRUE	440.1	505.45	5.82	6.28	6.59	2.78	1.14	68.69	18.25	6.19	0	22.9
14:46:26	1179.46	1092.1	87.3648	600.648	502.359	98.2856	393.149	131.222	251.177	0.2932	0.230242	-0.000180848	0.293426	0.259743	0.00461163	0.249661	0.548027	0.126594	0.103852	0.112714	TRUE	TRUE	TRUE	TRUE	440.1	505.45	5.82	6.28	6.59	2.78	1.14	68.72	18.25	6.19	0	22.9
14:46:27	1179.46	1092.1	98.2856	589.727	502.359	87.3648	393.149	131.222	262.098	0.292974	0.230242	-0.000135636	0.293539	0.259856	0.00528981	0.249209	0.547982	0.126322	0.103581	0.1119	TRUE	TRUE	TRUE	TRUE	440.1	505.45	5.82	6.28	6.59	2.78	1.14	68.72	18.25	1.4	0	22.9
14:46:28	1179.46	1092.1	98.2856	600.648	513.28	87.3648	393.149	120.301	251.177	0.293087	0.230355	-0.000135636	0.293539	0.259743	0.00479248	0.248892	0.548479	0.125554	0.103309	0.110996	TRUE	TRUE	TRUE	TRUE	436.33	505.45	5.82	6.28	6.59	2.78	1.14	68.72	18.25	1.4	0	22.9
14:46:29	1168.54	1092.1	87.3648	589.727	502.359	98.2856	393.149	131.222	262.098	0.293087	0.230355	-0.00022606	0.2932	0.259517	0.00492811	0.248892	0.54857	0.125011	0.103038	0.109413	TRUE	TRUE	TRUE	TRUE	436.33	505.45	5.82	6.28	6.59	2.76	1.14	68.72	18.25	1.4	0	22.9
14:46:30	1179.46	1092.1	98.2856	600.648	502.359	87.3648	393.149	131.222	251.177	0.292974	0.230242	0	0.293313	0.259517	0.00456642	0.249525	0.549835	0.124785	0.102677	0.10869	TRUE	TRUE	TRUE	TRUE	443.8	505.45	5.82	6.28	6.59	2.76	1.14	68.87	18.25	0.25	0	22.9
14:46:31	1179.46	1103.02	98.2856	589.727	513.28	87.3648	382.228	120.301	262.098	0.292861	0.230016	-9.04e-05	0.292861	0.259404	0.0048829	0.248938	0.550694	0.124604	0.102496	0.108283	TRUE	TRUE	TRUE	TRUE	443.8	505.45	5.81	6.28	6.59	2.76	1.14	68.87	18.25	0.25	0	22.9
14:46:32	1179.46	1092.1	98.2856	600.648	502.359	87.3648	393.149	131.222	251.177	0.292748	0.230016	-0.000180848	0.293087	0.259517	0.00497332	0.248712	0.550604	0.123836	0.10245	0.106881	TRUE	TRUE	TRUE	TRUE	436.24	505.45	5.81	6.28	6.59	2.76	1.14	68.87	18.25	0	0	22.9
14:46:33	1179.46	1092.1	87.3648	589.727	502.359	98.2856	393.149	131.222	262.098	0.292861	0.230016	-0.000180848	0.292861	0.259291	0.00470205	0.248938	0.552503	0.123971	0.102179	0.105208	TRUE	TRUE	TRUE	TRUE	436.24	505.45	5.8	6.28	6.59	2.76	1.14	68.87	18.25	0	0	23
14:46:34	1179.46	1092.1	98.2856	600.648	513.28	87.3648	393.149	120.301	251.177	0.292861	0.229903	-4.52e-05	0.292974	0.259291	0.0048829	0.248395	0.548524	0.122977	0.101818	0.104304	TRUE	TRUE	TRUE	TRUE	435.93	505.45	5.8	6.28	6.59	2.76	1.13	68.87	18.25	0	0	23
14:46:35	1168.54	1092.1	98.2856	589.727	502.359	87.3648	393.149	131.222	262.098	0.292748	0.230016	-0.00022606	0.292861	0.259065	0.00501854	0.249118	0.549881	0.122705	0.101501	0.103536	TRUE	TRUE	TRUE	TRUE	435.93	505.45	5.8	6.28	6.59	2.76	1.13	68.87	18.25	0	0	23
14:46:36	1179.46	1103.02	98.2856	600.648	513.28	98.2856	393.149	131.222	251.177	0.292861	0.230242	-0.000135636	0.292861	0.259065	0.00474726	0.249616	0.552187	0.122253	0.10123	0.103309	TRUE	TRUE	TRUE	TRUE	435.93	505.45	5.8	6.28	6.59	2.76	1.13	68.87	18.25	0	0	23
14:46:37	1179.46	1092.1	87.3648	589.727	502.359	87.3648	393.149	120.301	262.098	0.292861	0.230129	-4.52e-05	0.292635	0.258952	0.00515417	0.248621	0.55178	0.122073	0.100913	0.101953	TRUE	TRUE	TRUE	TRUE	435.93	505.45	5.8	6.28	6.59	2.76	1.13	68.87	18.25	0	0	23
14:46:38	1179.46	1092.1	98.2856	600.648	502.359	87.3648	393.149	131.222	251.177	0.292974	0.230129	-0.00022606	0.292635	0.258839	0.00497332	0.249435	0.554492	0.121304	0.100913	0.100099	TRUE	TRUE	TRUE	TRUE	435.93	503.77	5.8	6.28	6.72	2.76	1.14	68.87	18.25	0	0	23
14:46:39	1179.46	1092.1	98.2856	589.727	513.28	87.3648	393.149	131.222	262.098	0.292861	0.230129	4.52e-05	0.292861	0.259178	0.00492811	0.24948	0.553724	0.120897	0.100371	0.0996473	TRUE	TRUE	TRUE	TRUE	435.93	503.77	5.8	6.27	6.72	2.76	1.14	68.87	18.25	0	0	23
14:46:40	1168.54	1092.1	98.2856	600.648	502.359	98.2856	382.228	120.301	251.177	0.292748	0.230016	-4.52e-05	0.292522	0.258839	0.00696265	0.0859481	0.553678	0.120671	0.100054	0.0988335	TRUE	TRUE	FALSE	FALSE	435.93	503.62	5.8	6.27	6.72	2.76	1.14	68.87	18.25	0	0	23
14:46:41	1179.46	1092.1	87.3648	589.727	513.28	87.3648	240.256	87.5381	163.81	0.293652	0.230468	-0.000406908	0.292409	0.258613	0.00533502	0.00515417	0.554492	0.120219	0.100009	0.0956687	TRUE	TRUE	FALSE	FALSE	435.93	503.62	5.8	6.26	6.75	2.76	1.14	68.87	18.25	0	0	23
14:46:42	1179.46	1103.02	98.2856	600.648	502.359	87.3648	0	10.9415	0	0.293426	0.230468	-0.000180848	0.292296	0.258387	0.00533502	0.00510896	0.555532	0.119948	0.10019	0.0944027	TRUE	TRUE	FALSE	FALSE	435.93	501.91	5.8	6.26	6.75	2.76	1.14	68.87	18.25	0	0	23
14:46:43	1179.46	1092.1	98.2856	600.648	513.28	87.3648	0	0	0	0.292974	0.230355	-9.04e-05	0.292296	0.258274	0.00538023	0.00506375	0.556843	0.119495	0.10028	0.0926847	TRUE	TRUE	FALSE	FALSE	435.93	501.91	5.8	6.26	6.77	2.76	1.14	68.87	18.25	0	0	23
14:46:44	1179.46	1092.1	98.2856	589.727	502.359	98.2856	0	0	0	0.292861	0.230129	-0.000135636	0.292183	0.258387	0.00533502	0.00497332	0.557205	0.119134	0.100371	0.0915092	TRUE	TRUE	FALSE	FALSE	435.93	501.41	5.8	6.26	6.77	2.76	1.14	68.98	18.25	0	0	23
14:46:45	1179.46	1092.1	87.3648	600.648	513.28	87.3648	0	0	0	0.293087	0.230355	-4.52e-05	0.292183	0.258274	0.00538023	0.00483769	0.558426	0.118636	0.100868	0.0901076	TRUE	TRUE	FALSE	FALSE	435.93	501.41	5.8	6.26	6.78	2.76	1.14	68.98	18.25	0	0	23
14:46:46	1179.46	1092.1	98.2856	589.727	502.359	87.3648	0	0	0	0.292861	0.230355	-9.04e-05	0.29207	0.258161	0.00538023	0.00465684	0.55829	0.11823	0.101004	0.0883895	TRUE	TRUE	FALSE	FALSE	435.93	501.41	5.8	6.26	6.78	2.76	1.14	69.02	18.25	0	0	23
14:46:47	1179.46	1103.02	98.2856	600.648	502.359	87.3648	0	0	0	0.292861	0.230242	-4.52e-05	0.29207	0.258161	0.00533502	0.00461163	0.557702	0.117642	0.100732	0.0866715	TRUE	TRUE	FALSE	FALSE	435.93	501.41	5.8	6.26	6.78	2.76	1.14	69.02	18.25	0	0	23
14:46:48	1179.46	1092.1	98.2856	589.727	513.28	98.2856	0	0	0	0.293426	0.230807	-0.00022606	0.291844	0.257935	0.00533502	0.00452121	0.558471	0.117506	0.100868	0.0850891	TRUE	TRUE	FALSE	FALSE	417.88	501.41	5.8	6.26	6.78	2.76	1.14	69.02	18.25	0	0	23
14:46:49	1179.46	1092.1	98.2856	600.648	502.359	87.3648	0	0	0	0.292974	0.230242	-0.000180848	0.291844	0.258048	0.00528981	0.00447599	0.559737	0.116964	0.100823	0.083371	TRUE	TRUE	FALSE	FALSE	417.88	501.41	5.77	6.26	6.78	3.18	1.14	69.02	18.25	0	0	23
14:46:50	1179.46	1092.1	87.3648	589.727	513.28	87.3648	0	0	0	0.293087	0.230129	-0.000180848	0.291844	0.257935	0.00533502	0.00438557	0.55942	0.116557	0.101275	0.0823311	TRUE	TRUE	FALSE	FALSE	413.47	501.41	5.77	6.26	6.78	3.18	1.14	69.01	18.25	0	0	23
14:46:51	1168.54	1092.1	98.2856	600.648	502.359	87.3648	0	0	0	0.292974	0.230242	-9.04e-05	0.291731	0.257822	0.00533502	0.00429514	0.559285	0.116285	0.101411	0.0809296	TRUE	TRUE	FALSE	FALSE	413.47	501.41	5.77	6.26	6.78	3.26	1.14	69.01	18.25	0	0	23
14:46:52	1179.46	1092.1	98.2856	589.727	513.28	87.3648	0	0	0	0.292861	0.229903	0	0.291731	0.257935	0.00533502	0.00420472	0.56046	0.115698	0.101456	0.0797541	TRUE	TRUE	FALSE	FALSE	410.15	501.41	5.77	6.26	6.78	3.26	1.14	69.01	18.25	0	0	23
14:46:53	1179.46	1103.02	98.2856	600.648	502.359	98.2856	0	0	0	0.292748	0.230016	-9.04e-05	0.291618	0.257822	0.00538023	0.00415951	0.562359	0.115381	0.101275	0.0785785	TRUE	TRUE	FALSE	FALSE	410.15	501.41	5.77	6.26	6.78	3.32	1.14	69.01	18.25	0	0	23
14:46:54	1179.46	1092.1	87.3648	589.727	513.28	87.3648	0	0	0	0.292635	0.230016	0	0.291731	0.257709	0.00533502	0.00406908	0.559872	0.114703	0.101637	0.0774934	TRUE	TRUE	FALSE	FALSE	408.81	501.41	5.77	6.26	6.78	3.32	1.13	69.01	18.25	0	0	23
14:46:55	1179.46	1092.1	98.2856	600.648	502.359	87.3648	0	0	0	0.292748	0.230129	-0.00022606	0.291505	0.257596	0.00538023	0.00397866	0.562811	0.114567	0.101637	0.0761371	TRUE	TRUE	FALSE	FALSE	408.81	501.41	5.77	6.26	6.78	3.37	1.13	69.01	18.25	0	0	23
14:46:56	1179.46	1092.1	98.2856	589.727	513.28	87.3648	0	0	0	0.292861	0.230016	-0.000180848	0.291505	0.257596	0.00533502	0.00388824	0.562721	0.113934	0.101546	0.0748259	TRUE	TRUE	FALSE	FALSE	408.81	501.41	5.77	6.26	6.78	3.37	1.14	69.01	18.25	0	0	23
14:46:57	1168.54	1092.1	87.3648	600.648	502.359	87.3648	0	0	0	0.292748	0.230016	-0.000180848	0.291279	0.25737	0.00538023	0.00384302	0.564032	0.113799	0.102044	0.07356	TRUE	TRUE	FALSE	FALSE	408.81	501.41	5.77	6.26	6.78	3.37	1.14	69.01	18.25	0	0	23.1
14:46:58	1179.46	1092.1	98.2856	589.727	513.28	98.2856	0	0	0	0.292748	0.229903	-9.04e-05	0.291279	0.257256	0.00538023	0.0037526	0.564258	0.113256	0.101818	0.0718871	TRUE	TRUE	FALSE	FALSE	408.81	498.31	5.77	6.26	6.78	3.37	1.14	69.01	18.25	0	0	23.2
14:46:59	1179.46	1092.1	98.2856	600.648	502.359	87.3648	0	0	0	0.293539	0.230468	-0.000180848	0.291166	0.257144	0.00538023	0.00366218	0.565343	0.113166	0.10227	0.0710733	TRUE	TRUE	FALSE	FALSE	408.81	498.31	5.77	6.25	6.86	3.37	1.14	69.01	18.25	0	0	23.2
14:47:00	1179.46	1092.1	98.2856	589.727	502.359	87.3648	0	0	0	0.292974	0.230129	-0.000135636	0.291053	0.257256	0.00538023	0.00352654	0.563942	0.112488	0.102044	0.0696265	TRUE	TRUE	FALSE	FALSE	408.81	497.08	5.77	6.25	6.86	3.37	1.14	69.01	18.25	0	0	23.2
14:47:01	1179.46	1103.02	98.2856	600.648	513.28	87.3648	0	0	0	0.292522	0.22979	0	0.291053	0.25703	0.00533502	0.00343612	0.563399	0.112035	0.10236	0.0684058	TRUE	TRUE	FALSE	FALSE	408.81	497.08	5.77	6.25	6.87	3.37	1.14	69.01	18.25	0	0	23.2
14:47:02	1179.46	1092.1	87.3648	589.727	502.359	87.3648	0	0	0	0.292635	0.230016	-9.04e-05	0.291053	0.256917	0.00533502	0.0033909	0.564936	0.111448	0.10227	0.0673659	TRUE	TRUE	FALSE	FALSE	408.81	496.89	5.77	6.25	6.87	3.37	1.14	69.01	18.25	0	0	23.2
14:47:03	1168.54	1092.1	98.2856	600.648	513.28	87.3648	0	0	0	0.292974	0.230016	-0.000135636	0.291053	0.25703	0.00533502	0.00330048	0.567106	0.111086	0.102586	0.0660096	TRUE	TRUE	FALSE	FALSE	408.81	496.89	5.77	6.25	6.87	3.37	1.14	69.01	18.25	0	0	23.2
14:47:04	1179.46	1092.1	98.2856	589.727	502.359	98.2856	0	0	0	0.292522	0.229903	-0.00022606	0.291053	0.25703	0.00533502	0.00321005	0.566835	0.110544	0.102631	0.0647436	TRUE	TRUE	FALSE	FALSE	408.81	496.68	5.77	6.25	6.87	3.37	1.14	63.83	18.25	0	0	23.2
14:47:05	1179.46	1092.1	87.3648	589.727	513.28	87.3648	0	0	0	0.292635	0.22979	-0.000135636	0.29094	0.256804	0.00533502	0.00316484	0.567739	0.110363	0.102541	0.0635229	TRUE	TRUE	FALSE	FALSE	408.81	496.68	5.77	6.25	6.87	3.37	1.14	63.83	18.25	0	0	23.2
14:47:06	1179.46	1092.1	98.2856	600.648	502.359	87.3648	0	0	0	0.293087	0.230016	-4.52e-05	0.290826	0.256917	0.00533502	0.00307442	0.569186	0.10973	0.102586	0.0621213	TRUE	TRUE	FALSE	FALSE	408.81	496.68	5.77	6.24	6.87	3.37	1.14	61.49	18.25	0	0	23.2
14:47:07	1179.46	1103.02	98.2856	600.648	513.28	87.3648	0	0	0	0.293539	0.230921	-4.52e-05	0.290826	0.256804	0.00538023	0.00302921	0.568191	0.109323	0.102857	0.0606293	TRUE	TRUE	FALSE	FALSE	408.81	496.68	5.77	6.24	6.87	3.37	1.14	61.49	18.25	0	0	23.2
14:47:08	1179.46	1092.1	98.2856	589.727	502.359	87.3648	0	0	0	0.2932	0.230581	-0.000180848	0.290826	0.256917	0.00538023	0.00293878	0.568689	0.109006	0.102948	0.0600416	TRUE	TRUE	FALSE	FALSE	398.98	496.68	5.77	6.24	6.87	3.37	1.14	61.49	18.25	0	0	23.2
14:47:09	1179.46	1092.1	98.2856	600.648	513.28	98.2856	0	0	0	0.293087	0.230468	0	0.290826	0.256917	0.00533502	0.00284836	0.568237	0.108645	0.102993	0.05864	TRUE	TRUE	FALSE	FALSE	398.98	496.68	5.77	6.24	6.87	3.41	1.14	58.37	18.25	0	0	23.2
14:47:10	1168.54	1092.1	87.3648	600.648	502.359	87.3648	0	0	0	0.292635	0.230016	-9.04e-05	0.29094	0.25703	0.00538023	0.00280315	0.56896	0.108147	0.103264	0.0572837	TRUE	TRUE	FALSE	FALSE	399.77	496.68	5.76	6.24	6.87	3.41	1.14	55.63	18.25	0	0	23.2
14:47:11	1179.46	1092.1	98.2856	589.727	513.28	87.3648	0	0	0	0.292748	0.230355	-0.000180848	0.290826	0.256917	0.00533502	0.00275793	0.572351	0.10765	0.103264	0.0561082	TRUE	TRUE	FALSE	FALSE	399.77	496.68	5.76	6.24	6.87	3.39	1.14	55.63	18.25	0	0	23.2
14:47:12	1179.46	1092.1	98.2856	600.648	502.359	87.3648	0	0	0	0.292861	0.230016	-0.000180848	0.290826	0.256804	0.00538023	0.00266751	0.568644	0.107379	0.103309	0.0548422	TRUE	TRUE	FALSE	FALSE	399.77	496.68	5.76	6.24	6.87	3.39	1.14	55.63	18.25	0	0	23.2
14:47:13	1179.46	1103.02	98.2856	589.727	513.28	87.3648	0	0	0	0.292974	0.230242	0	0.290714	0.256917	0.00538023	0.00253187	0.571311	0.107017	0.103355	0.0536215	TRUE	TRUE	FALSE	FALSE	399.94	496.68	5.76	6.24	6.87	3.36	1.14	55.63	18.25	0	0	23.2
14:47:14	1179.46	1092.1	87.3648	600.648	502.359	87.3648	0	0	0	0.293652	0.231034	0	0.290826	0.256917	0.00533502	0.00253187	0.572035	0.106565	0.103536	0.0524912	TRUE	TRUE	FALSE	FALSE	399.94	496.68	5.75	6.24	6.87	3.36	1.14	55.63	18.25	0	0	23.2
14:47:15	1179.46	1092.1	98.2856	589.727	513.28	87.3648	0	0	0	0.2932	0.230807	9.04e-05	0.290826	0.256917	0.00538023	0.00244145	0.571492	0.106067	0.103626	0.0509992	TRUE	TRUE	FALSE	FALSE	396.97	496.68	5.75	6.24	6.87	3.33	1.14	55.63	18.25	0	0	23.2
14:47:16	1179.46	1092.1	98.2856	600.648	513.28	98.2856	0	0	0	0.292861	0.230242	0	0.290826	0.256804	0.00538023	0.00235103	0.572442	0.105841	0.103807	0.049688	TRUE	TRUE	FALSE	FALSE	396.97	496.68	5.75	6.24	6.87	3.33	1.14	55.63	18.25	0	0	23.2
14:47:17	1179.46	1103.02	98.2856	600.648	502.359	87.3648	0	0	0	0.292635	0.230129	0	0.291053	0.256917	0.00533502	0.00230581	0.572803	0.105435	0.104033	0.0538023	TRUE	TRUE	FALSE	FALSE	396.97	496.68	5.75	6.24	6.87	3.33	1.14	55.63	18.25	0	0	23.2
14:47:18	1179.46	1092.1	87.3648	589.727	513.28	87.3648	0	0	0	0.292748	0.230129	-4.52e-05	0.29094	0.256917	0.00533502	0.00230581	0.573346	0.105028	0.103988	0.0558369	TRUE	TRUE	FALSE	FALSE	396.97	496.68	5.75	6.24	6.87	3.33	1.14	55.63	18.25	0	0	23.2
14:47:19	1168.54	1092.1	98.2856	600.648	502.359	87.3648	0	0	0	0.292861	0.230355	0.00022606	0.290714	0.256691	0.00533502	0.00217018	0.5733	0.104485	0.104214	0.0561986	TRUE	TRUE	FALSE	FALSE	396.97	494.88	5.75	6.24	6.9	3.33	1.14	55.63	18.25	0	0	23.2
14:47:20	1179.46	1092.1	98.2856	600.648	513.28	87.3648	0	0	0	0.292748	0.230129	4.52e-05	0.290714	0.256691	0.00538023	0.00212497	0.573255	0.104123	0.104168	0.0561082	TRUE	TRUE	FALSE	FALSE	396.97	494.88	5.75	6.24	6.9	3.33	1.14	55.63	18.25	0	0	23.2
14:47:21	1179.46	1092.1	98.2856	589.727	502.359	98.2856	0	0	0	0.292861	0.230355	9.04e-05	0.290826	0.256917	0.00533502	0.00207975	0.573074	0.103626	0.104259	0.0563342	TRUE	TRUE	FALSE	FALSE	396.97	494.69	5.75	6.24	6.9	3.33	1.14	55.63	18.25	0	0	23.2
14:47:22	1179.46	1103.02	98.2856	600.648	513.28	87.3648	0	0	0	0.292861	0.230016	0.000180848	0.2906	0.256691	0.00538023	0.00207975	0.572758	0.103219	0.104214	0.0564246	TRUE	TRUE	FALSE	FALSE	396.97	494.69	5.75	6.24	6.9	3.33	1.14	55.63	18.25	0	0	23
14:47:23	1179.46	1092.1	87.3648	589.727	513.28	87.3648	0	0	0	0.293426	0.230921	0.000135636	0.2906	0.256691	0.00538023	0.00194412	0.572758	0.102857	0.104349	0.056289	TRUE	TRUE	FALSE	FALSE	396.97	496.58	5.75	6.24	6.91	3.33	1.14	55.63	18.25	0	0	23
14:47:24	1179.46	1092.1	98.2856	600.648	502.359	87.3648	0	0	0	0.292974	0.230355	-4.52e-05	0.290826	0.256804	0.00538023	0.00189891	0.572667	0.102541	0.104485	0.0563342	TRUE	TRUE	FALSE	FALSE	396.97	496.58	5.75	6.24	6.91	3.33	1.14	41.04	18.25	0	0	23
14:47:25	1179.46	1092.1	98.2856	589.727	513.28	87.3648	0	0	0	0.292861	0.230242	4.52e-05	0.291166	0.256917	0.00538023	0.00185369	0.572261	0.101772	0.104802	0.0563794	TRUE	TRUE	FALSE	FALSE	396.97	496.35	5.75	6.24	6.92	3.33	1.14	41.04	18.25	0	0	23
14:47:26	1179.46	1092.1	98.2856	600.648	502.359	87.3648	0	0	0	0.292748	0.230129	4.52e-05	0.291053	0.257144	0.00538023	0.00176327	0.572306	0.101818	0.104847	0.0561986	TRUE	TRUE	FALSE	FALSE	396.97	496.35	5.75	6.24	6.92	3.33	1.14	39.26	18.25	0	0	23
14:47:27	1179.46	1092.1	98.2856	589.727	513.28	87.3648	0	0	0	0.292974	0.229903	9.04e-05	0.290826	0.25703	0.00538023	0.00167285	0.572306	0.101456	0.104666	0.0563342	TRUE	TRUE	FALSE	FALSE	396.97	496.35	5.75	6.24	6.92	3.33	1.14	39.26	18.25	0	0	23
14:47:28	1179.46	1103.02	87.3648	600.648	502.359	98.2856	0	0	0	0.292748	0.229677	-4.52e-05	0.290826	0.256804	0.00538023	0.00162763	0.572125	0.100959	0.104892	0.056289	TRUE	TRUE	FALSE	FALSE	396.97	496.35	5.75	6.24	6.92	3.33	1.14	37.71	18.25	0	0	23
14:47:29	1168.54	1092.1	98.2856	589.727	513.28	87.3648	0	0	0	0.292974	0.230355	4.52e-05	0.290714	0.256917	0.00538023	0.00158242	0.571989	0.100371	0.104937	0.0563342	TRUE	TRUE	FALSE	FALSE	407.07	496.35	5.75	6.24	6.92	3.13	1.14	37.71	18.25	0	0	23
14:47:30	1179.46	1092.1	98.2856	600.648	502.359	87.3648	0	0	0	0.292635	0.229903	0.00022606	0.29094	0.256917	0.00538023	0.00144678	0.571854	0.100054	0.105254	0.056289	TRUE	TRUE	FALSE	FALSE	407.07	496.35	5.75	6.24	6.92	3.13	1.14	36.16	18.25	0	0	23
14:47:31	1179.46	1092.1	98.2856	567.885	513.28	87.3648	0	0	0	0.292861	0.230016	0	0.114613	0.110996	0.00538023	0.00144678	0.571809	0.0998282	0.105299	0.0561986	TRUE	FALSE	FALSE	FALSE	409.31	496.35	5.75	6.24	6.92	3.1	1.14	36.16	18.25	0	0	23
14:47:32	1179.46	1103.02	98.2856	65.5234	382.228	0	0	0	0	0.292974	0.230242	-4.52e-05	0.0401257	0.0392214	0.00528981	0.00135636	0.571402	0.0999186	0.105299	0.056289	TRUE	FALSE	FALSE	FALSE	409.31	496.35	5.75	6.24	6.92	3.1	1.14	36.16	18.25	0	0	23
14:47:33	1179.46	1092.1	87.3648	0	207.494	0	0	0	0	0.292974	0.230129	-4.52e-05	0.01865	0.0176327	0.00538023	0.00126594	0.57104	0.100099	0.105389	0.0563342	TRUE	FALSE	FALSE	FALSE	409.66	496.35	5.75	6.24	6.92	0	1.14	36.16	18.25	0	0	23
14:47:34	1179.46	1092.1	98.2856	0	120.127	0	0	0	0	0.292748	0.230016	-0.000135636	0.00983362	0.00859029	0.00533502	0.00117551	0.570769	0.100416	0.105525	0.056289	TRUE	FALSE	FALSE	FALSE	409.66	496.35	5.75	6.24	6.92	0	1.13	36.16	18.25	0	0	23
14:47:35	1179.46	1092.1	98.2856	0	76.4441	0	0	0	0	0.292861	0.230129	-9.04e-05	0.00519938	0.00452121	0.00533502	0.00108509	0.570452	0.100506	0.105525	0.0562438	TRUE	FALSE	FALSE	FALSE	402.9	496.35	5.75	6.24	6.92	0	1.13	36.16	18.25	0	0	23.1
14:47:36	1179.46	1092.1	98.2856	0	32.7614	0	0	0	0	0.292974	0.230129	0	0.00372999	0.00180848	0.00533502	0.00108509	0.57009	0.100597	0.10557	0.0564698	TRUE	FALSE	FALSE	FALSE	402.9	496.35	5.75	6.24	6.92	0	1.14	36.16	18.25	0	0	23.1
14:47:37	1179.46	1092.1	87.3648	0	0	0	0	0	0	0.293426	0.230355	-0.000135636	0.00282575	0.000791211	0.00533502	0.00103988	0.57	0.100687	0.10548	0.0564698	TRUE	FALSE	FALSE	FALSE	402.9	496.35	5.75	6.24	6.92	0	1.14	36.16	18.25	0	0	23.2
14:47:38	1179.46	1103.02	98.2856	0	0	0	0	0	0	0.293991	0.23126	-0.000316484	0.00248666	0.00045212	0.00538023	0.000994665	0.569593	0.100823	0.10557	0.0564246	TRUE	FALSE	FALSE	FALSE	402.9	496.35	5.75	6.24	6.92	0	1.14	36.16	18.25	0	0	23.2
14:47:39	1179.46	1092.1	98.2856	0	0	0	0	0	0	0.293087	0.230242	-4.52e-05	0.00214757	0.00011303	0.00533502	0.000949453	0.569186	0.101004	0.105661	0.0564698	TRUE	FALSE	FALSE	FALSE	402.9	492.49	5.75	6.24	6.94	0	1.14	36.16	18.25	0	0	23.2
14:47:40	1179.46	1092.1	98.2856	0	0	0	0	0	0	0.292748	0.230129	-9.04e-05	0.00203454	0.00011303	0.00533502	0.000813817	0.56887	0.101139	0.10557	0.0565151	TRUE	FALSE	FALSE	FALSE	402.9	492.49	5.75	6.24	6.94	0	1.14	36.16	18.25	0	0	23.1
14:47:41	1179.46	1092.1	98.2856	0	0	0	0	0	0	0.292861	0.230016	4.52e-05	0.00214757	0.00011303	0.00533502	0.000768605	0.568644	0.101004	0.105525	0.0564698	TRUE	FALSE	FALSE	FALSE	402.9	493.33	5.75	6.24	6.95	0	1.14	36.16	18.25	0	0	23
14:47:42	1179.46	1092.1	87.3648	0	0	0	0	0	0	0.292861	0.22979	9.04e-05	0.00203454	0	0.00528981	0.000678181	0.568463	0.101139	0.105525	0.0564246	TRUE	FALSE	FALSE	FALSE	402.9	493.33	5.75	6.24	6.95	0	1.14	36.16	18.25	0	0	23
14:47:43	1179.46	1092.1	98.2856	0	0	0	0	0	0	0.292748	0.229677	-4.52e-05	0.00203454	0	0.00528981	0.000678181	0.567785	0.10132	0.10557	0.0563794	TRUE	FALSE	FALSE	FALSE	402.9	494.22	5.75	6.24	6.95	0	1.14	36.16	18.25	0	0	23
14:47:44	1168.54	1092.1	98.2856	0	0	0	0	0	0	0.292861	0.230129	0	0.00203454	0	0.00528981	0.000632969	0.567604	0.101637	0.10557	0.0563342	TRUE	FALSE	FALSE	FALSE	402.9	494.22	5.75	6.24	6.95	0	1.14	29.2	18.25	0	0	23.2
14:47:45	1179.46	1092.1	98.2856	0	0	0	0	0	0	0.292748	0.230016	0	0.00203454	-0.00011303	0.00533502	0.000587757	0.567287	0.101411	0.10557	0.0564698	TRUE	FALSE	FALSE	FALSE	402.9	491.94	5.75	6.24	6.95	0	1.14	29.2	18.25	0	0	23.2
14:47:46	1179.46	1092.1	98.2856	0	0	0	0	0	0	0.292861	0.230355	0.000180848	0.00203454	0.00011303	0.00528981	0.000542545	0.566926	0.101637	0.10548	0.0564698	TRUE	FALSE	FALSE	FALSE	402.9	491.94	5.75	6.24	6.95	0	1.14	28.5	18.25	0	0	23.2
14:47:47	1179.46	1103.02	87.3648	0	0	0	0	0	0	0.292748	0.230016	-9.04e-05	0.00214757	0.00011303	0.00533502	0.000497333	0.566338	0.101411	0.105525	0.0564698	TRUE	FALSE	FALSE	FALSE	402.9	491.94	5.75	6.24	6.95	0	1.14	28.5	18.25	0	0	23.2
14:47:48	1179.46	1092.1	98.2856	0	0	0	0	0	0	0.292635	0.229903	-9.04e-05	0.00214757	0	0.00533502	0.00045212	0.566247	0.101637	0.105615	0.0564246	TRUE	FALSE	FALSE	FALSE	402.9	491.94	5.75	6.24	6.95	0	1.14	27.89	18.25	0	0	23.2
14:47:49	1179.46	1092.1	98.2856	0	0	0	0	0	0	0.292635	0.230016	4.52e-05	0.00214757	0.00022606	0.00533502	0.00045212	0.565976	0.101546	0.10557	0.0564246	TRUE	FALSE	FALSE	FALSE	405.1	491.94	5.75	6.24	6.95	0	1.14	27.89	18.25	0	0	23.2
14:47:50	1168.54	1092.1	98.2856	0	0	0	0	0	0	0.292974	0.230016	-0.00022606	0.00214757	0.00022606	0.00533502	0.000406908	0.56575	0.102044	0.105525	0.0565603	TRUE	FALSE	FALSE	FALSE	405.1	491.94	5.74	6.24	6.95	0	1.14	27.19	18.25	0	0	23
14:47:51	1179.46	1092.1	87.3648	0	0	0	0	0	0	0.292522	0.229677	-4.52e-05	0.00214757	0.00011303	0.00533502	0.000316484	0.565253	0.101592	0.105525	0.0565603	TRUE	FALSE	FALSE	FALSE	405.25	491.94	5.74	6.24	6.95	0	1.14	27.19	18.25	0	0	23.1
14:47:52	1179.46	1092.1	98.2856	0	0	0	0	0	0	0.292748	0.230242	-0.000135636	0.0022606	0.00011303	0.00533502	0.000271272	0.564891	0.101727	0.105615	0.0564698	TRUE	FALSE	FALSE	FALSE	405.25	491.94	5.73	6.24	6.95	0	1.14	27.19	18.25	0	0	23.1
14:47:53	1179.46	1092.1	98.2856	0	0	0	0	0	0	0.292974	0.230016	-4.52e-05	0.00214757	0.00045212	0.00533502	0.000271272	0.564529	0.102044	0.10557	0.0564246	TRUE	FALSE	FALSE	FALSE	404.17	491.94	5.73	6.24	6.95	0	1.14	27.19	18.25	0	0	23
14:47:54	1179.46	1092.1	98.2856	0	0	0	0	0	0	0.292861	0.22979	4.52e-05	0.0022606	0.00022606	0.00533502	0.000271272	0.564394	0.102089	0.10557	0.0564246	TRUE	FALSE	FALSE	FALSE	404.17	491.94	5.74	6.24	6.95	0	1.14	27.19	18.25	0	0	23
14:47:55	1179.46	1103.02	98.2856	0	0	0	0	0	0	0.292748	0.22979	-4.52e-05	0.00271272	0.000904241	0.00528981	9.04e-05	0.564077	0.102179	0.105435	0.0564246	TRUE	FALSE	FALSE	FALSE	407.89	491.94	5.74	6.24	6.95	0	1.14	27.19	18.25	0	0	23
14:47:56	1179.46	1092.1	87.3648	0	0	0	0	0	0	0.292861	0.230129	-9.04e-05	0.00350393	0.00203454	0.00533502	9.04e-05	0.563851	0.10227	0.105615	0.0564246	TRUE	FALSE	FALSE	FALSE	407.89	491.94	5.74	6.24	6.95	0	1.14	27.19	18.25	0	0	23
14:47:57	1168.54	1092.1	98.2856	0	0	0	0	0	0	0.292974	0.230129	0	0.00429514	0.0033909	0.00528981	4.52e-05	0.563399	0.102496	0.105615	0.0564698	TRUE	FALSE	FALSE	FALSE	407.89	491.94	5.74	6.24	6.95	0	1.14	27.19	18.25	0	0	23
14:47:58	1179.46	1092.1	98.2856	0	0	0	0	0	0	0.292635	0.230016	-0.000135636	0.00486029	0.00429514	0.00533502	4.52e-05	0.563218	0.102586	0.10557	0.0564246	TRUE	FALSE	FALSE	FALSE	407.89	491.94	5.74	6.24	6.95	0	1.14	27.19	18.25	0	0	23
14:47:59	1179.46	1092.1	98.2856	0	0	0	0	0	0	0.293426	0.230468	-0.000180848	0.00632969	0.00610363	0.00533502	4.52e-05	0.562947	0.102812	0.10557	0.0564246	TRUE	FALSE	FALSE	FALSE	407.89	492.34	5.74	6.24	6.95	0	1.14	27.19	18.25	0	0	23
14:48:00	1179.46	1092.1	98.2856	0	0	0	0	0	0	0.293313	0.230468	0	0.00757302	0.00757302	0.00533502	-4.52e-05	0.56263	0.102767	0.105525	0.0564246	TRUE	FALSE	FALSE	FALSE	407.89	492.34	5.74	6.24	6.95	0	1.14	27.19	18.25	0	0	23
14:48:01	1179.46	1103.02	87.3648	0	0	0	0	0	0	0.292635	0.229903	-4.52e-05	0.00870332	0.00870332	0.00533502	-4.52e-05	0.562359	0.102857	0.10557	0.0563794	TRUE	FALSE	FALSE	FALSE	407.89	492.23	5.74	6.24	6.94	0	1.14	27.19	18.25	0	0	23
14:48:02	1179.46	1092.1	98.2856	0	0	0	0	0	0	0.292635	0.230129	4.52e-05	0.00926847	0.00881635	0.00533502	-0.000135636	0.561907	0.103129	0.10557	0.0563794	TRUE	FALSE	FALSE	FALSE	407.89	492.23	5.74	6.24	6.94	0	1.14	27.19	18.25	0	0	23
14:48:03	1179.46	1092.1	98.2856	0	0	0	0	0	0	0.292748	0.230129	-4.52e-05	0.00915544	0.00881635	0.00533502	-0.000135636	0.561771	0.103174	0.105525	0.0564246	TRUE	FALSE	FALSE	FALSE	407.89	492.06	5.74	6.24	6.96	0	1.14	27.19	18.25	0	0	23
14:48:04	1179.46	1092.1	98.2856	0	0	0	0	0	0	0.292635	0.230016	-4.52e-05	0.00892938	0.00881635	0.00533502	-0.000135636	0.5615	0.103219	0.10548	0.0564246	TRUE	FALSE	FALSE	FALSE	407.89	492.06	5.74	6.24	6.96	0	1.14	27.19	18.25	0	0	23.1
14:48:05	1168.54	1092.1	98.2856	0	0	0	0	0	0	0.292974	0.230016	-4.52e-05	0.00904241	0.00881635	0.00533502	-0.000271272	0.561229	0.103355	0.105525	0.0564246	TRUE	FALSE	FALSE	FALSE	407.89	490.95	5.74	6.24	6.96	0	1.14	24.51	18.25	0	0	23.1
14:48:06	1179.46	1092.1	87.3648	0	0	0	0	0	0	0.293426	0.230355	-0.000135636	0.00892938	0.00881635	0.00528981	-0.000271272	0.560958	0.103581	0.105615	0.0563794	TRUE	FALSE	FALSE	FALSE	407.89	490.95	5.74	6.24	6.96	0	1.14	24.51	18.25	0	0	23.1
14:48:07	1179.46	1092.1	98.2856	0	0	0	0	0	0	0.292974	0.230242	-9.04e-05	0.00892938	0.00870332	0.00528981	-0.000271272	0.560686	0.103581	0.10557	0.0564246	TRUE	FALSE	FALSE	FALSE	407.89	490.95	5.74	6.24	6.96	0	1.14	24.25	18.25	0	0	23.1
14:48:08	1179.46	1103.02	98.2856	0	0	0	0	0	0	0.292635	0.230129	4.52e-05	0.00892938	0.00881635	0.00533502	-0.000316484	0.560279	0.103671	0.105525	0.0563342	TRUE	FALSE	FALSE	FALSE	407.89	490.95	5.74	6.24	6.96	0	1.14	24.25	18.25	0	0	23
14:48:09	1179.46	1092.1	98.2856	0	0	0	0	0	0	0.292635	0.229903	-4.52e-05	0.00915544	0.00881635	0.00528981	-0.000316484	0.559963	0.103942	0.10548	0.0563342	TRUE	FALSE	FALSE	FALSE	411.56	490.95	5.74	6.24	6.96	0	1.14	24	18.25	0	0	23.1
14:48:10	1179.46	1092.1	98.2856	0	0	0	0	0	0	0.292635	0.229903	-9.04e-05	0.00892938	0.00870332	0.00538023	-0.000406908	0.559918	0.104078	0.10557	0.0564246	TRUE	FALSE	FALSE	FALSE	411.56	490.95	5.73	6.24	6.96	0	1.14	24	18.25	0	0	23
14:48:11	1179.46	1092.1	87.3648	0	0	0	0	0	0	0.292861	0.230129	0	0.00892938	0.00881635	0.00533502	-0.000361696	0.55933	0.104078	0.10557	0.0564246	TRUE	FALSE	FALSE	FALSE	412.12	490.95	5.73	6.24	6.96	0	1.14	23.76	18.25	0	0	23
14:48:12	1168.54	1092.1	98.2856	0	0	0	0	0	0	0.2932	0.230355	-0.000316484	0.00892938	0.00870332	0.00533502	-0.000406908	0.559014	0.104168	0.105525	0.0563794	TRUE	FALSE	FALSE	FALSE	412.12	490.95	5.73	6.24	6.96	0	1.14	23.76	18.25	0	0	23
14:48:13	1179.46	1103.02	98.2856	0	0	0	0	0	0	0.293426	0.230921	-0.000180848	0.00926847	0.00870332	0.00533502	-0.00045212	0.558697	0.104259	0.105525	0.0564246	TRUE	FALSE	FALSE	FALSE	407.89	490.95	5.73	6.24	6.96	0	1.14	23.76	18.25	0	0	23
14:48:14	1190.38	1092.1	98.2856	0	0	0	0	0	0	0.293652	0.230581	-0.000135636	0.00915544	0.00881635	0.00528981	-0.000406908	0.558426	0.10444	0.105661	0.0564246	TRUE	FALSE	FALSE	FALSE	407.89	490.95	5.73	6.24	6.96	0	1.14	23.76	18.25	0	0	23
14:48:15	1179.46	1092.1	98.2856	0	0	0	0	0	0	0.2932	0.230581	0.000135636	0.00904241	0.00870332	0.00533502	-0.000497333	0.557838	0.104621	0.10557	0.0563794	TRUE	FALSE	FALSE	FALSE	407.6	490.95	5.73	6.24	6.96	0	1.13	23.76	18.25	0	0	23
14:48:16	1179.46	1103.02	98.2856	0	0	0	0	0	0	0.293765	0.231034	-9.04e-05	0.00904241	0.00870332	0.00528981	-0.000497333	0.557702	0.104666	0.10557	0.0563794	TRUE	FALSE	FALSE	FALSE	407.6	490.95	5.73	6.24	6.96	0	1.13	23.76	18.25	0	0	23
14:48:17	1179.46	1092.1	87.3648	0	0	0	0	0	0	0.2932	0.230581	-0.000135636	0.00892938	0.00881635	0.00533502	-0.000542545	0.55725	0.104711	0.105525	0.0564246	TRUE	FALSE	FALSE	FALSE	407.6	490.95	5.73	6.24	6.96	0	1.14	23.76	18.25	0	0	23
14:48:18	1179.46	1092.1	98.2856	0	0	0	0	0	0	0.292861	0.230355	-0.00022606	0.00915544	0.00881635	0.00528981	-0.000587757	0.556979	0.104982	0.10548	0.0563342	TRUE	FALSE	FALSE	FALSE	407.6	490.95	5.73	6.24	6.96	0	1.14	23.76	18.25	0	0	23
14:48:19	1179.46	1092.1	98.2856	0	0	0	0	0	0	0.292748	0.229903	-0.000180848	0.00904241	0.00881635	0.00533502	-0.000587757	0.556436	0.105073	0.10557	0.0563794	TRUE	FALSE	FALSE	FALSE	407.6	490.66	5.73	6.24	6.83	0	1.14	23.76	18.25	0	0	23
14:48:20	1179.46	1103.02	98.2856	0	0	0	0	0	0	0.292861	0.230242	-4.52e-05	0.00892938	0.00870332	0.00533502	-0.000678181	0.556165	0.105525	0.105615	0.0563794	TRUE	FALSE	FALSE	FALSE	407.6	490.66	5.73	6.25	6.83	0	1.14	23.76	18.25	0	0	23
14:48:21	1179.46	1092.1	98.2856	0	0	0	0	0	0	0.292974	0.230016	-0.000361696	0.00881635	0.00870332	0.00528981	-0.000632969	0.556029	0.105389	0.10557	0.056289	TRUE	FALSE	FALSE	FALSE	407.6	490.46	5.73	6.25	3.92	0	1.14	23.76	18.25	0	0	23
14:48:22	1168.54	1092.1	87.3648	0	0	0	0	0	0	0.292748	0.22979	-4.52e-05	0.00881635	0.00859029	0.00533502	-0.000632969	0.555487	0.105435	0.105525	0.0564246	TRUE	FALSE	FALSE	FALSE	407.6	490.46	5.73	6.25	3.92	0	1.14	23.76	18.25	0	0	23
14:48:23	1179.46	1092.1	98.2856	0	0	0	0	0	0	0.292748	0.230129	-0.000316484	0.00870332	0.00847726	0.00528981	-0.000632969	0.555216	0.10557	0.10557	0.0563342	TRUE	FALSE	FALSE	FALSE	407.6	490.25	5.73	6.25	0	0	1.14	23.76	18.25	0	0	23
14:48:24	1179.46	1103.02	98.2856	0	0	0	0	0	0	0.292635	0.229903	-0.000180848	0.00847726	0.0082512	0.00533502	-0.000678181	0.55499	0.105706	0.10557	0.0563794	TRUE	FALSE	FALSE	FALSE	407.6	490.25	5.73	6.25	0	0	1.14	23.76	18.25	0	0	23
14:48:25	1179.46	1092.1	98.2856	0	0	0	0	0	0	0.292748	0.230129	-0.000135636	0.00836423	0.00813817	0.00533502	-0.000723393	0.554492	0.105841	0.10557	0.0564246	TRUE	FALSE	FALSE	FALSE	407.6	490.03	5.73	6.25	0	0	1.14	22.57	18.25	0	0	23
14:48:26	1179.46	1092.1	98.2856	0	0	0	0	0	0	0.292748	0.230016	-0.000180848	0.0082512	0.00813817	0.00533502	-0.000768605	0.554085	0.105841	0.10557	0.0563794	TRUE	FALSE	FALSE	FALSE	407.6	490.03	5.73	6.26	0	0	1.14	22.57	18.25	0	0	23
14:48:27	1168.54	1092.1	98.2856	0	0	0	0	0	0	0.292861	0.230129	-9.04e-05	0.0082512	0.00791211	0.00533502	-0.000768605	0.553452	0.106022	0.105525	0.0563342	TRUE	FALSE	FALSE	FALSE	407.6	490.03	5.73	6.26	0	0	1.14	22.45	18.25	0	0	23
14:48:28	1179.46	1092.1	87.3648	0	0	0	0	0	0	0.293087	0.230016	-0.000135636	0.00802514	0.00768605	0.00533502	-0.000768605	0.553272	0.106339	0.10548	0.0563794	TRUE	FALSE	FALSE	FALSE	407.6	490.03	5.73	6.26	0	0	1.14	22.45	18.25	0	0	23
14:48:29	1179.46	1092.1	98.2856	0	0	0	0	0	0	0.292861	0.22979	-9.04e-05	0.00802514	0.00757302	0.00533502	-0.000768605	0.552774	0.106384	0.10557	0.056289	TRUE	FALSE	FALSE	FALSE	412.11	490.03	5.73	6.26	0	0	1.14	22.34	18.25	0	0	23
14:48:30	1179.46	1092.1	98.2856	0	0	0	0	0	0	0.292635	0.22979	-0.000316484	0.00791211	0.00757302	0.00533502	-0.000859029	0.552503	0.106474	0.10557	0.0563342	TRUE	FALSE	FALSE	FALSE	412.11	490.03	5.73	6.26	0	0	1.14	22.34	18.25	0	0	23
14:48:31	1179.46	1103.02	98.2856	0	0	0	0	0	0	0.292748	0.230016	-0.000180848	0.00779908	0.00745999	0.00533502	-0.000859029	0.552096	0.1067	0.10557	0.0563342	TRUE	FALSE	FALSE	FALSE	411.96	490.03	5.73	6.26	0	0	1.14	22.25	18.25	0	0	23
14:48:32	1168.54	1092.1	98.2856	0	0	0	0	0	0	0.292748	0.229903	-0.000316484	0.00779908	0.00745999	0.00533502	-0.000859029	0.55178	0.10661	0.105615	0.056289	TRUE	FALSE	FALSE	FALSE	411.96	490.03	5.73	6.26	0	0	1.14	22.25	18.25	0	0	23
14:48:33	1179.46	1092.1	87.3648	0	0	0	0	0	0	0.293539	0.230807	-4.52e-05	0.00768605	0.00745999	0.00528981	-0.000859029	0.551373	0.106791	0.105661	0.056289	TRUE	FALSE	FALSE	FALSE	411.55	490.03	5.73	6.26	0	0	1.14	22.25	18.25	0	0	23
14:48:34	1179.46	1092.1	98.2856	0	0	0	0	0	0	0.2932	0.230355	-0.000180848	0.00779908	0.00723393	0.00533502	-0.000904241	0.551011	0.106746	0.10557	0.056289	TRUE	FALSE	FALSE	FALSE	411.55	490.03	5.72	6.26	0	0	1.14	22.25	18.25	0	0	23
14:48:35	1190.38	1092.1	98.2856	0	0	0	0	0	0	0.292861	0.230242	-0.000135636	0.00757302	0.00734696	0.00528981	-0.000904241	0.55074	0.107243	0.10557	0.0562438	TRUE	FALSE	FALSE	FALSE	411.27	490.03	5.72	6.26	0	0	1.13	22.25	18.25	0	0	23
14:48:36	1168.54	1103.02	98.2856	0	0	0	0	0	0	0.293087	0.230355	-0.000361696	0.00757302	0.0071209	0.00533502	-0.000904241	0.550333	0.107469	0.105525	0.0562438	TRUE	FALSE	FALSE	FALSE	411.27	490.03	5.72	6.26	0	0	1.13	22.25	18.25	0	0	23
14:48:37	1190.38	1092.1	98.2856	0	0	0	0	0	0	0.292861	0.230016	-0.000316484	0.00734696	0.00700787	0.00533502	-0.000949453	0.549971	0.107333	0.10548	0.056289	TRUE	FALSE	FALSE	FALSE	411.27	490.03	5.72	6.26	0	0	1.14	22.25	18.25	0	0	23
14:48:38	1168.54	1092.1	98.2856	0	0	0	0	0	0	0.292861	0.230016	0	0.00734696	0.00666878	0.00533502	-0.000949453	0.549655	0.10756	0.10557	0.0563342	TRUE	FALSE	FALSE	FALSE	411.27	490.03	5.72	6.26	0	0	1.14	22.25	18.25	0	0	23
14:48:39	1179.46	1092.1	87.3648	0	0	0	0	0	0	0.292635	0.229677	-0.000406908	0.00723393	0.00678181	0.00533502	-0.000949453	0.549157	0.107514	0.105615	0.056289	TRUE	FALSE	FALSE	FALSE	411.27	487.92	5.72	6.26	0	0	1.14	22.25	18.25	0	0	23
14:48:40	1179.46	1092.1	98.2856	0	0	0	0	0	0	0.292409	0.22979	-0.000135636	0.00700787	0.00644272	0.00533502	-0.00103988	0.548976	0.10774	0.10557	0.056289	TRUE	FALSE	FALSE	FALSE	411.27	487.92	5.72	6.26	0	0	1.14	22.25	18.25	0	0	23
14:48:41	1179.46	1092.1	98.2856	0	0	0	0	0	0	0.292635	0.229903	-0.000406908	0.00700787	0.00644272	0.00528981	-0.00103988	0.54866	0.107695	0.105525	0.0563342	TRUE	FALSE	FALSE	FALSE	411.27	487.61	5.72	6.26	0	0	1.14	22.25	18.25	0	0	23
14:48:42	1179.46	1092.1	98.2856	0	0	0	0	0	0	0.292635	0.230355	-0.000361696	0.00689484	0.00644272	0.00528981	-0.00103988	0.548208	0.108057	0.10557	0.0563342	TRUE	FALSE	FALSE	FALSE	411.27	487.61	5.72	6.26	0	0	1.14	22.25	18.25	0	0	23
14:48:43	1168.54	1103.02	98.2856	0	0	0	0	0	0	0.293087	0.230468	-0.000180848	0.00666878	0.00632969	0.00528981	-0.00108509	0.547846	0.108012	0.105615	0.0563342	TRUE	FALSE	FALSE	FALSE	411.27	487.26	5.72	6.26	0	0	1.14	22.25	18.25	0	0	23
14:48:44	1179.46	1092.1	98.2856	0	0	0	0	0	0	0.293426	0.230468	-0.00022606	0.00666878	0.00587757	0.00528981	-0.00108509	0.54753	0.108238	0.10557	0.0563794	TRUE	FALSE	FALSE	FALSE	411.27	487.26	5.72	6.26	0	0	1.14	22.25	18.25	0	0	23
14:48:45	1179.46	1092.1	87.3648	0	0	0	0	0	0	0.293313	0.230581	-0.000180848	0.00655575	0.0059906	0.00533502	-0.00108509	0.547168	0.108238	0.105615	0.056289	TRUE	FALSE	FALSE	FALSE	411.27	486.98	5.72	6.26	0	0	1.14	21.86	18.25	0	0	23
14:48:46	1179.46	1092.1	98.2856	0	0	0	0	0	0	0.292974	0.230242	-0.00022606	0.00644272	0.00587757	0.00533502	-0.0011303	0.546852	0.108192	0.105525	0.0563342	TRUE	FALSE	FALSE	FALSE	411.27	486.98	5.72	6.26	0	0	1.14	21.86	18.25	0	0	23
14:48:47	1179.46	1092.1	98.2856	0	0	0	0	0	0	0.292635	0.229451	-0.000135636	0.00644272	0.00576454	0.00528981	-0.0011303	0.546535	0.108599	0.105525	0.0561986	TRUE	FALSE	FALSE	FALSE	411.27	486.98	5.72	6.26	0	0	1.14	21.84	18.25	0	0	23
14:48:48	1179.46	1103.02	98.2856	0	0	0	0	0	0	0.292748	0.230016	-0.000180848	0.00621666	0.00553848	0.00533502	-0.00108509	0.546128	0.108554	0.105615	0.056289	TRUE	FALSE	FALSE	FALSE	411.27	486.98	5.72	6.26	0	0	1.14	21.84	18.25	0	0	23
14:48:49	1179.46	1092.1	98.2856	0	0	0	0	0	0	0.292635	0.229903	-0.00022606	0.00621666	0.00553848	0.00533502	-0.0011303	0.545585	0.108961	0.10548	0.056289	TRUE	FALSE	FALSE	FALSE	410.52	486.98	5.72	6.26	0	0	1.14	21.82	18.25	0	0	23
14:48:50	1168.54	1092.1	87.3648	0	0	0	0	0	0	0.2932	0.230242	-0.00022606	0.00621666	0.00542545	0.00528981	-0.00117551	0.545359	0.10869	0.10557	0.0561986	TRUE	FALSE	FALSE	FALSE	410.52	486.98	5.72	6.26	0	0	1.14	21.82	18.25	0	0	23
14:48:51	1179.46	1092.1	98.2856	0	0	0	0	0	0	0.292748	0.230016	-0.000406908	0.0059906	0.00531242	0.00533502	-0.0011303	0.544952	0.108871	0.10557	0.056289	TRUE	FALSE	FALSE	FALSE	410.73	486.98	5.72	6.26	0	0	1.14	21.82	18.25	0	0	23
14:48:52	1179.46	1092.1	98.2856	0	0	0	0	0	0	0.292748	0.229903	-0.00022606	0.0059906	0.00531242	0.00528981	-0.0011303	0.54441	0.109051	0.105615	0.0563794	TRUE	FALSE	FALSE	FALSE	410.73	486.98	5.72	6.26	0	0	1.14	21.82	18.25	0	0	23
14:48:53	1179.46	1092.1	98.2856	0	0	0	0	0	0	0.292748	0.22979	-0.000316484	0.00565151	0.00519938	0.00528981	-0.00122072	0.544139	0.109323	0.10557	0.056289	TRUE	FALSE	FALSE	FALSE	410.88	486.98	5.72	6.26	0	0	1.14	21.82	18.25	0	0	23
14:48:54	1179.46	1103.02	98.2856	0	0	0	0	0	0	0.292748	0.230016	-0.000361696	0.00576454	0.00497332	0.00533502	-0.0011303	0.543325	0.109323	0.10557	0.0563342	TRUE	FALSE	FALSE	FALSE	410.88	486.98	5.72	6.26	0	0	1.14	21.82	18.25	0	0	23
14:48:55	1179.46	1092.1	98.2856	0	0	0	0	0	0	0.292522	0.229903	-0.000180848	0.00565151	0.00497332	0.00533502	-0.00117551	0.542963	0.109549	0.10557	0.0562438	TRUE	FALSE	FALSE	FALSE	411.07	486.98	5.72	6.26	0	0	1.14	21.82	18.25	0	0	23
14:48:56	1179.46	1092.1	98.2856	0	0	0	0	0	0	0.292861	0.230016	-0.000135636	0.00565151	0.00497332	0.00533502	-0.00117551	0.542421	0.109368	0.10548	0.0563342	TRUE	FALSE	FALSE	FALSE	411.07	486.98	5.72	6.26	0	0	1.14	21.82	18.25	0	0	23
14:48:57	1179.46	1092.1	87.3648	0	0	0	0	0	0	0.292635	0.229677	-0.000542545	0.00553848	0.00497332	0.00533502	-0.00117551	0.542014	0.109775	0.105615	0.056289	TRUE	FALSE	FALSE	FALSE	411.07	486.98	5.72	6.26	0	0	1.15	21.82	18.25	0	0	23
14:48:58	1179.46	1092.1	98.2856	0	0	0	0	0	0	0.292635	0.22979	-0.00022606	0.00553848	0.00474726	0.00533502	-0.00122072	0.541516	0.109956	0.10557	0.0563342	TRUE	FALSE	FALSE	FALSE	411.07	486.98	5.72	6.26	0	0	1.15	21.82	18.25	0	0	23
14:48:59	1179.46	1092.1	98.2856	0	0	0	0	0	0	0.292635	0.230016	-0.000316484	0.00531242	0.00474726	0.00533502	-0.00122072	0.540974	0.109956	0.10557	0.056289	TRUE	FALSE	FALSE	FALSE	411.07	486.98	5.72	6.26	0	0	1.14	21.82	18.25	0	0	23
14:49:00	1168.54	1103.02	98.2856	0	0	0	0	0	0	0.292748	0.230242	-0.000271272	0.00531242	0.00463423	0.00533502	-0.00117551	0.540657	0.110136	0.105525	0.0562438	TRUE	FALSE	FALSE	FALSE	411.07	483.5	5.72	6.26	0	0	1.14	21.82	18.25	0	0	23
14:49:01	1179.46	1092.1	98.2856	0	0	0	0	0	0	0.292974	0.230016	-0.00022606	0.00519938	0.00463423	0.00528981	-0.00126594	0.540296	0.110182	0.10548	0.056289	TRUE	FALSE	FALSE	FALSE	411.07	483.5	5.72	6.26	0	0	1.14	21.82	18.25	0	0	23
14:49:02	1179.46	1092.1	98.2856	0	0	0	0	0	0	0.292635	0.230016	-0.000361696	0.00519938	0.00452121	0.00533502	-0.00126594	0.539844	0.110453	0.105525	0.0562438	TRUE	FALSE	FALSE	FALSE	411.07	482.91	5.72	6.26	0	0	1.14	21.82	18.25	0	0	23
14:49:03	1179.46	1092.1	87.3648	0	0	0	0	0	0	0.292748	0.229903	-0.000361696	0.00508635	0.00440817	0.00533502	-0.00122072	0.539482	0.110498	0.105661	0.0562438	TRUE	FALSE	FALSE	FALSE	411.07	482.91	5.72	6.26	0	0	1.14	21.82	18.25	0	0	23
14:49:04	1179.46	1092.1	98.2856	0	0	0	0	0	0	0.292748	0.229903	-0.000316484	0.00519938	0.00440817	0.00528981	-0.00126594	0.53912	0.110679	0.10557	0.0562438	TRUE	FALSE	FALSE	FALSE	411.07	482.47	5.72	6.26	0	0	1.14	21.82	18.25	0	0	23
14:49:05	1168.54	1092.1	98.2856	0	0	0	0	0	0	0.292748	0.230129	-0.000361696	0.00497332	0.00429514	0.00528981	-0.00122072	0.538623	0.11086	0.105525	0.0561986	TRUE	FALSE	FALSE	FALSE	411.07	482.47	5.72	6.26	0	0	1.14	21.79	18.25	0	0	23
14:49:06	1179.46	1092.1	98.2856	0	0	0	0	0	0	0.292635	0.230016	-0.00022606	0.00508635	0.00429514	0.00533502	-0.00126594	0.538442	0.110679	0.105525	0.0563342	TRUE	FALSE	FALSE	FALSE	411.07	481.89	5.72	6.26	0	0	1.14	21.79	18.25	0	0	23
14:49:07	1179.46	1103.02	98.2856	0	0	0	0	0	0	0.292635	0.229903	-0.000316484	0.00497332	0.00418211	0.00528981	-0.00126594	0.538126	0.110815	0.105615	0.0562438	TRUE	FALSE	FALSE	FALSE	411.07	481.89	5.72	6.26	0	0	1.14	21.83	18.25	0	0	23
14:49:08	1179.46	1092.1	98.2856	0	0	0	0	0	0	0.292409	0.229451	-0.000316484	0.00497332	0.00418211	0.00528981	-0.00126594	0.537809	0.111041	0.105615	0.056289	TRUE	FALSE	FALSE	FALSE	411.07	481.89	5.72	6.26	0	0	1.14	21.83	18.25	0	0	23
14:49:09	1179.46	1092.1	87.3648	0	0	0	0	0	0	0.292748	0.229903	-0.00022606	0.00497332	0.00395605	0.00533502	-0.00126594	0.537538	0.111222	0.105525	0.056289	TRUE	FALSE	FALSE	FALSE	410.04	481.89	5.72	6.26	0	0	1.14	21.88	18.25	0	0	23
14:49:10	1168.54	1092.1	98.2856	0	0	0	0	0	0	0.292748	0.22979	-0.000361696	0.00474726	0.00384302	0.00528981	-0.00126594	0.537086	0.111357	0.105615	0.0563342	TRUE	FALSE	FALSE	FALSE	410.04	481.89	5.72	6.26	0	0	1.14	21.88	18.25	0	0	23
14:49:11	1179.46	1092.1	98.2856	0	0	0	0	0	0	0.292635	0.229903	-0.000497333	0.00474726	0.00406908	0.00528981	-0.00126594	0.536633	0.111583	0.10557	0.056289	TRUE	FALSE	FALSE	FALSE	410.06	481.89	5.72	6.26	0	0	1.14	21.94	18.25	0	0	23
14:49:12	1179.46	1092.1	98.2856	0	0	0	0	0	0	0.292522	0.229677	-0.000406908	0.00474726	0.00384302	0.00533502	-0.00126594	0.536272	0.111493	0.105615	0.056289	TRUE	FALSE	FALSE	FALSE	410.06	481.89	5.72	6.26	0	0	1.14	21.94	18.25	0	0	23
14:49:13	1179.46	1092.1	98.2856	0	0	0	0	0	0	0.292522	0.22979	-0.00045212	0.00463423	0.00384302	0.00533502	-0.00126594	0.536	0.111855	0.10557	0.056289	TRUE	FALSE	FALSE	FALSE	410.06	481.89	5.72	6.26	0	0	1.14	21.94	18.25	0	0	23
14:49:14	1179.46	1092.1	98.2856	0	0	0	0	0	0	0.292748	0.230016	-0.000180848	0.00463423	0.00372999	0.00533502	-0.00131115	0.535594	0.112126	0.105525	0.0562438	TRUE	FALSE	FALSE	FALSE	410.56	481.89	5.72	6.26	0	0	1.14	21.94	18.25	0	0	23
14:49:15	1179.46	1092.1	98.2856	0	0	0	0	0	0	0.292409	0.229564	-0.000271272	0.00474726	0.00384302	0.00533502	-0.00126594	0.535413	0.112216	0.10557	0.0563342	TRUE	FALSE	FALSE	FALSE	410.56	481.89	5.72	6.26	0	0	1.14	21.94	18.25	0	0	23
14:49:16	1168.54	1092.1	87.3648	0	0	0	0	0	0	0.292409	0.229677	-0.000271272	0.00463423	0.00372999	0.00533502	-0.00131115	0.535006	0.112307	0.105615	0.0563342	TRUE	FALSE	FALSE	FALSE	410.48	481.89	5.72	6.26	0	0	1.14	21.94	18.25	0	0	23
14:49:17	1179.46	1092.1	98.2856	0	0	0	0	0	0	0.292522	0.230016	-0.000316484	0.00452121	0.00361696	0.00533502	-0.00131115	0.534599	0.112216	0.105615	0.056289	TRUE	FALSE	FALSE	FALSE	410.48	481.89	5.72	6.26	0	0	1.15	21.94	18.25	0	0	23
14:49:18	1179.46	1092.1	98.2856	0	0	0	0	0	0	0.292635	0.230016	-0.000271272	0.00452121	0.00361696	0.00533502	-0.00131115	0.534147	0.112533	0.10557	0.0562438	TRUE	FALSE	FALSE	FALSE	410.48	481.89	5.72	6.26	0	0	1.15	21.94	18.25	0	0	23
14:49:19	1168.54	1092.1	98.2856	0	0	0	0	0	0	0.292409	0.229677	-0.000406908	0.00452121	0.00361696	0.00533502	-0.00131115	0.533921	0.112442	0.10548	0.056289	TRUE	FALSE	FALSE	FALSE	410.48	481.89	5.72	6.26	0	0	1.15	21.94	18.25	0	0	23
14:49:20	1179.46	1103.02	98.2856	0	0	0	0	0	0	0.292635	0.229903	-0.000497333	0.00452121	0.00350393	0.00533502	-0.00131115	0.533424	0.112623	0.10557	0.056289	TRUE	FALSE	FALSE	FALSE	410.48	477.39	5.72	6.26	0	0	1.15	21.94	18.25	0	0	23
14:49:21	1179.46	1092.1	98.2856	0	0	0	0	0	0	0.292409	0.22979	-0.00022606	0.00452121	0.00350393	0.00533502	-0.00126594	0.533062	0.112714	0.10557	0.0562438	TRUE	FALSE	FALSE	FALSE	410.48	477.39	5.72	6.27	0	0	1.14	21.94	18.25	0	0	23
14:49:22	1179.46	1092.1	98.2856	0	0	0	0	0	0	0.292522	0.230016	-0.000587757	0.00452121	0.00350393	0.00533502	-0.00135636	0.532745	0.112849	0.10557	0.0563342	TRUE	FALSE	FALSE	FALSE	410.48	476.84	5.72	6.27	0	0	1.14	21.94	18.25	0	0	23
14:49:23	1168.54	1092.1	87.3648	0	0	0	0	0	0	0.292409	0.22979	-0.000406908	0.00440817	0.00350393	0.00528981	-0.00131115	0.532293	0.113075	0.10557	0.0562438	TRUE	FALSE	FALSE	FALSE	410.48	476.84	5.72	6.27	0	0	1.14	21.94	18.25	0	0	23
14:49:24	1179.46	1092.1	98.2856	0	0	0	0	0	0	0.292409	0.229903	-0.000406908	0.00440817	0.00350393	0.00528981	-0.00131115	0.531932	0.113166	0.105525	0.056289	TRUE	FALSE	FALSE	FALSE	410.48	476.16	5.72	6.27	0	0	1.14	21.94	18.25	0	0	23
14:49:25	1179.46	1092.1	98.2856	0	0	0	0	0	0	0.292522	0.229677	-0.000587757	0.00452121	0.0033909	0.00528981	-0.00135636	0.531615	0.113211	0.105525	0.056289	TRUE	FALSE	FALSE	FALSE	410.48	476.16	5.72	6.27	0	0	1.14	22.24	18.25	0	0	23
14:49:26	1168.54	1092.1	98.2856	0	0	0	0	0	0	0.292635	0.22979	-0.000406908	0.00440817	0.0033909	0.00533502	-0.00135636	0.531072	0.113573	0.10557	0.056289	TRUE	FALSE	FALSE	FALSE	410.48	475.49	5.72	6.27	0	0	1.14	22.24	18.25	0	0	23
14:49:27	1179.46	1092.1	98.2856	0	0	0	0	0	0	0.292296	0.229677	-0.000361696	0.00440817	0.00327787	0.00528981	-0.00131115	0.530801	0.113301	0.105615	0.056289	TRUE	FALSE	FALSE	FALSE	410.48	475.49	5.72	6.27	0	0	1.14	22.33	18.25	0	0	23
14:49:28	1179.46	1092.1	98.2856	0	0	0	0	0	0	0.292296	0.22979	-0.000497333	0.00440817	0.0033909	0.00533502	-0.00131115	0.530439	0.113573	0.105615	0.0561986	TRUE	FALSE	FALSE	FALSE	410.48	475.49	5.72	6.27	0	0	1.14	22.33	18.25	0	0	23
14:49:29	1179.46	1092.1	98.2856	0	0	0	0	0	0	0.292974	0.230242	-0.000406908	0.00418211	0.0033909	0.00528981	-0.00131115	0.529987	0.113753	0.105525	0.0562438	TRUE	FALSE	FALSE	FALSE	410.48	475.49	5.72	6.27	0	0	1.14	22.41	18.25	0	0	23
14:49:30	1179.46	1092.1	98.2856	0	0	0	0	0	0	0.292635	0.230016	-0.000497333	0.00440817	0.00327787	0.00528981	-0.00135636	0.529626	0.113753	0.105615	0.056289	TRUE	FALSE	FALSE	FALSE	410.06	475.49	5.72	6.27	0	0	1.14	22.41	18.25	0	0	23
14:49:31	1168.54	1092.1	87.3648	0	0	0	0	0	0	0.292409	0.229677	-0.00045212	0.00429514	0.00327787	0.00533502	-0.00135636	0.5294	0.113889	0.105615	0.056289	TRUE	FALSE	FALSE	FALSE	410.06	475.49	5.71	6.27	0	0	1.14	22.42	18.25	0	0	23
14:49:32	1179.46	1092.1	98.2856	0	0	0	0	0	0	0.292409	0.229677	-0.000632969	0.00440817	0.0033909	0.00528981	-0.00126594	0.528948	0.11398	0.105615	0.056289	TRUE	FALSE	FALSE	FALSE	410.14	475.49	5.71	6.27	0	0	1.14	22.42	18.25	0	0	23
14:49:33	1179.46	1092.1	98.2856	0	0	0	0	0	0	0.292409	0.22979	-0.000587757	0.00440817	0.00316484	0.00533502	-0.00135636	0.528495	0.114251	0.105615	0.056289	TRUE	FALSE	FALSE	FALSE	410.14	475.49	5.7	6.27	0	0	1.14	22.42	18.25	0	0	23
14:49:34	1179.46	1103.02	98.2856	0	0	0	0	0	0	0.292183	0.229338	-0.00045212	0.00418211	0.0033909	0.00538023	-0.00131115	0.528269	0.114115	0.10557	0.0563342	TRUE	FALSE	FALSE	FALSE	410.14	475.49	5.7	6.27	0	0	1.14	22.42	18.25	0	0	23
14:49:35	1179.46	1092.1	98.2856	0	0	0	0	0	0	0.292183	0.229451	-0.000497333	0.00429514	0.00327787	0.00528981	-0.00131115	0.527998	0.114251	0.105525	0.0563342	TRUE	FALSE	FALSE	FALSE	410.14	475.49	5.7	6.27	0	0	1.14	22.42	18.25	0	0	23
14:49:36	1179.46	1092.1	98.2856	0	0	0	0	0	0	0.292748	0.230129	-0.000678181	0.00429514	0.00316484	0.00528981	-0.00135636	0.527501	0.114703	0.105525	0.0563342	TRUE	FALSE	FALSE	FALSE	410.3	475.49	5.7	6.27	0	0	1.14	22.42	18.25	0	0	23
14:49:37	1168.54	1092.1	98.2856	0	0	0	0	0	0	0.292409	0.229903	-0.000497333	0.00429514	0.00305181	0.00528981	-0.00135636	0.527229	0.114477	0.10557	0.056289	TRUE	FALSE	FALSE	FALSE	410.3	475.49	5.7	6.27	0	0	1.14	22.42	18.25	0	0	23
14:49:38	1179.46	1092.1	98.2856	0	0	0	0	0	0	0.292409	0.229564	-0.000271272	0.00429514	0.00293878	0.00528981	-0.00135636	0.527049	0.114567	0.10557	0.0563342	TRUE	FALSE	FALSE	FALSE	410.3	475.49	5.7	6.27	0	0	1.14	22.42	18.25	0	0	23
14:49:39	1179.46	1092.1	87.3648	0	0	0	0	0	0	0.292409	0.22979	-0.000497333	0.00452121	0.00327787	0.00528981	-0.00135636	0.526642	0.114703	0.10548	0.056289	TRUE	FALSE	FALSE	FALSE	410.3	475.49	5.7	6.27	0	0	1.14	22.42	18.25	0	0	23
14:49:40	1179.46	1092.1	98.2856	0	0	0	0	0	0	0.292409	0.229677	-0.000542545	0.00429514	0.00327787	0.00528981	-0.00135636	0.52628	0.114929	0.10557	0.056289	TRUE	FALSE	FALSE	FALSE	410.3	470.26	5.7	6.27	0	0	1.14	22.42	18.25	0	0	23
14:49:41	1179.46	1092.1	98.2856	0	0	0	0	0	0	0.292296	0.229564	-0.000587757	0.00429514	0.00316484	0.00528981	-0.00140157	0.525964	0.115019	0.10557	0.056289	TRUE	FALSE	FALSE	FALSE	410.3	470.26	5.7	6.27	0	0	1.14	22.42	18.25	0	0	23
14:49:42	1168.54	1092.1	98.2856	0	0	0	0	0	0	0.292635	0.230016	-0.000497333	0.00418211	0.00305181	0.00528981	-0.00135636	0.525647	0.114974	0.10557	0.056289	TRUE	FALSE	FALSE	FALSE	410.3	469.54	5.7	6.27	0	0	1.14	22.42	18.25	0	0	23
14:49:43	1179.46	1092.1	98.2856	0	0	0	0	0	0	0.292409	0.229564	-0.000542545	0.00429514	0.00305181	0.00528981	-0.00135636	0.524924	0.115155	0.105525	0.056289	TRUE	FALSE	FALSE	FALSE	410.3	469.54	5.7	6.27	0	0	1.14	22.42	18.25	0	0	23
14:49:44	1179.46	1103.02	98.2856	0	0	0	0	0	0	0.292409	0.22979	-0.000361696	0.00418211	0.00327787	0.00528981	-0.00135636	0.524788	0.1152	0.105525	0.056289	TRUE	FALSE	FALSE	FALSE	410.3	468.88	5.7	6.27	0	0	1.14	22.42	18.25	0	0	23
14:49:45	1168.54	1092.1	98.2856	0	0	0	0	0	0	0.292183	0.229564	-0.000542545	0.00429514	0.00327787	0.00528981	-0.00140157	0.524471	0.115472	0.10557	0.056289	TRUE	FALSE	FALSE	FALSE	410.3	468.88	5.7	6.27	0	0	1.14	22.76	18.25	0	0	23
14:49:46	1179.46	1092.1	98.2856	0	0	0	0	0	0	0.292296	0.22979	-0.000632969	0.00429514	0.00293878	0.00533502	-0.00135636	0.5242	0.115607	0.105615	0.056289	TRUE	FALSE	FALSE	FALSE	410.3	468.26	5.7	6.27	0	0	1.14	22.76	18.25	0	0	23
14:49:47	1179.46	1092.1	98.2856	0	0	0	0	0	0	0.292183	0.229564	-0.000406908	0.00429514	0.00305181	0.00528981	-0.00135636	0.523658	0.115562	0.105615	0.0562438	TRUE	FALSE	FALSE	FALSE	410.3	468.26	5.7	6.27	0	0	1.14	22.76	18.25	0	0	23
14:49:48	1179.46	1092.1	87.3648	0	0	0	0	0	0	0.292296	0.229677	-0.000542545	0.00429514	0.00305181	0.00528981	-0.00135636	0.523522	0.115878	0.10548	0.056289	TRUE	FALSE	FALSE	FALSE	410.3	468.26	5.7	6.27	0	0	1.14	22.85	18.25	0	0	23
14:49:49	1179.46	1092.1	98.2856	0	0	0	0	0	0	0.292296	0.229903	-0.00045212	0.00429514	0.00305181	0.00533502	-0.00135636	0.523296	0.115833	0.105525	0.056289	TRUE	FALSE	FALSE	FALSE	410.3	468.26	5.7	6.27	0	0	1.14	22.85	18.25	0	0	23
14:49:50	1179.46	1092.1	98.2856	0	0	0	0	0	0	0.292296	0.229451	-0.00045212	0.00418211	0.00316484	0.00528981	-0.00135636	0.522844	0.116014	0.10557	0.0563794	TRUE	FALSE	FALSE	FALSE	410.47	468.26	5.7	6.27	0	0	1.14	22.94	18.25	0	0	23
14:49:51	1179.46	1092.1	98.2856	0	0	0	0	0	0	0.292183	0.229451	-0.000678181	0.00418211	0.00316484	0.00528981	-0.00140157	0.522347	0.115878	0.10557	0.056289	TRUE	FALSE	FALSE	FALSE	410.47	468.26	5.68	6.27	0	0	1.14	22.94	18.25	0	0	23
14:49:52	1168.54	1103.02	98.2856	0	0	0	0	0	0	0.292183	0.229564	-0.000497333	0.00429514	0.00327787	0.00533502	-0.00140157	0.52203	0.116014	0.10548	0.0562438	TRUE	FALSE	FALSE	FALSE	410.35	468.26	5.68	6.27	0	0	1.14	23.03	18.25	0	0	23
14:49:53	1179.46	1092.1	98.2856	0	0	0	0	0	0	0.292296	0.22979	-0.000497333	0.00440817	0.00316484	0.00538023	-0.00135636	0.521849	0.11615	0.10557	0.0563342	TRUE	FALSE	FALSE	FALSE	410.35	468.26	5.68	6.27	0	0	1.14	23.03	18.25	0	0	23
14:49:54	1179.46	1081.17	98.2856	0	0	0	0	0	0	0.292296	0.229564	-0.000723393	0.00429514	0.00305181	0.00533502	-0.00140157	0.521442	0.116195	0.105525	0.0563342	TRUE	FALSE	FALSE	FALSE	410.24	468.26	5.68	6.27	0	0	1.14	23.03	18.25	0	0	23
14:49:55	1179.46	1103.02	98.2856	0	0	0	0	0	0	0.292409	0.22979	-0.000678181	0.00429514	0.00316484	0.00533502	-0.00140157	0.521171	0.116421	0.10557	0.0563794	TRUE	FALSE	FALSE	FALSE	410.24	468.26	5.68	6.27	0	0	1.14	23.03	18.25	0	0	23
14:49:56	1179.46	1081.17	98.2856	0	0	0	0	0	0	0.292296	0.22979	-0.000542545	0.00429514	0.00316484	0.00528981	-0.00140157	0.520854	0.116602	0.105615	0.0563342	TRUE	FALSE	FALSE	FALSE	410.06	468.26	5.68	6.27	0	0	1.13	23.03	18.25	0	0	23
14:49:57	1179.46	1103.02	98.2856	0	0	0	0	0	0	0.29207	0.229451	-0.000678181	0.00429514	0.00305181	0.00528981	-0.00140157	0.520357	0.116602	0.105525	0.0563794	TRUE	FALSE	FALSE	FALSE	410.06	468.26	5.68	6.27	0	0	1.13	23.03	18.25	0	0	23
14:49:58	1179.46	1092.1	98.2856	0	0	0	0	0	0	0.292296	0.229677	-0.00045212	0.00429514	0.00327787	0.00533502	-0.00135636	0.51995	0.116692	0.10557	0.0563794	TRUE	FALSE	FALSE	FALSE	410.06	468.26	5.68	6.27	0	0	1.13	23.03	18.25	0	0	23
14:49:59	1179.46	1092.1	87.3648	0	0	0	0	0	0	0.292296	0.229564	-0.000361696	0.00440817	0.00327787	0.00533502	-0.00135636	0.519589	0.116828	0.105525	0.0563342	TRUE	FALSE	FALSE	FALSE	410.06	468.26	5.68	6.27	0	0	1.13	23.03	18.25	0	0	23
14:50:00	1168.54	1092.1	98.2856	0	0	0	0	0	0	0.292183	0.229677	-0.000271272	0.00429514	0.00327787	0.00533502	-0.00135636	0.519136	0.117054	0.10557	0.0563342	TRUE	FALSE	FALSE	FALSE	410.06	463.25	5.68	6.27	0	0	1.14	23.03	18.25	0	0	23
14:50:01	1179.46	1092.1	98.2856	0	0	0	0	0	0	0.292296	0.22979	-0.000542545	0.00429514	0.00305181	0.00533502	-0.00135636	0.518956	0.117099	0.105615	0.0563794	TRUE	FALSE	FALSE	FALSE	410.06	463.25	5.68	6.27	0	0	1.14	23.03	18.25	0	0	23
14:50:02	1179.46	1092.1	98.2856	0	0	0	0	0	0	0.292409	0.22979	-0.000632969	0.00418211	0.00305181	0.00528981	-0.00140157	0.518277	0.117009	0.10557	0.056289	TRUE	FALSE	FALSE	FALSE	410.06	462.72	5.68	6.27	0	0	1.14	23.03	18.25	0	0	23
14:50:03	1179.46	1092.1	98.2856	0	0	0	0	0	0	0.292296	0.229677	-0.000678181	0.00440817	0.00316484	0.00528981	-0.00140157	0.518142	0.11728	0.10557	0.0563342	TRUE	FALSE	FALSE	FALSE	410.06	462.72	5.68	6.27	0	0	1.14	23.03	18.25	0	0	23
14:50:04	1179.46	1092.1	98.2856	0	0	0	0	0	0	0.292522	0.230016	-0.00045212	0.00418211	0.00316484	0.00528981	-0.00140157	0.51778	0.117325	0.10557	0.0563342	TRUE	FALSE	FALSE	FALSE	410.06	462.2	5.68	6.27	0	0	1.14	23.03	18.25	0	0	23
14:50:05	1168.54	1092.1	98.2856	0	0	0	0	0	0	0.292183	0.229677	-0.000542545	0.00429514	0.00327787	0.00533502	-0.00140157	0.517373	0.117461	0.105615	0.0563342	TRUE	FALSE	FALSE	FALSE	410.06	462.2	5.68	6.27	0	0	1.14	23.03	18.25	0	0	23
14:50:06	1179.46	1103.02	98.2856	0	0	0	0	0	0	0.29207	0.229338	-0.000542545	0.00418211	0.00305181	0.00533502	-0.00140157	0.516921	0.117642	0.105525	0.0563342	TRUE	FALSE	FALSE	FALSE	410.06	461.61	5.68	6.27	0	0	1.14	23.43	18.25	0	0	23
14:50:07	1179.46	1092.1	98.2856	0	0	0	0	0	0	0.292183	0.229677	-0.000678181	0.00429514	0.00305181	0.00528981	-0.00140157	0.51665	0.117506	0.105525	0.0563342	TRUE	FALSE	FALSE	FALSE	410.06	461.61	5.68	6.27	0	0	1.14	23.43	18.25	0	0	23
14:50:08	1179.46	1092.1	98.2856	0	0	0	0	0	0	0.292522	0.22979	-0.000632969	0.00429514	0.00305181	0.00533502	-0.00140157	0.516198	0.117461	0.105615	0.0563342	TRUE	FALSE	FALSE	FALSE	410.06	461.61	5.68	6.27	0	0	1.14	23.51	18.25	0	0	23
14:50:09	1179.46	1092.1	98.2856	0	0	0	0	0	0	0.292183	0.229338	-0.000632969	0.00440817	0.00305181	0.00533502	-0.00140157	0.515881	0.117777	0.105615	0.0563794	TRUE	FALSE	FALSE	FALSE	410.06	461.61	5.68	6.27	0	0	1.14	23.51	18.25	0	0	23
14:50:10	1179.46	1092.1	98.2856	0	0	0	0	0	0	0.291957	0.229677	-0.00045212	0.00418211	0.00327787	0.00533502	-0.00140157	0.515565	0.117823	0.105615	0.0563342	TRUE	FALSE	FALSE	FALSE	410.53	461.61	5.68	6.27	0	0	1.14	23.6	18.25	0	0	23
14:50:11	1179.46	1092.1	98.2856	0	0	0	0	0	0	0.292183	0.229677	-0.000678181	0.00406908	0.00305181	0.00533502	-0.00144678	0.515158	0.118049	0.10557	0.0563342	TRUE	FALSE	FALSE	FALSE	410.53	461.61	5.64	6.27	0	0	1.14	23.6	18.24	0	0	23
14:50:12	1168.54	1092.1	98.2856	0	0	0	0	0	0	0.292183	0.229451	-0.000542545	0.00429514	0.00316484	0.00533502	-0.00135636	0.514751	0.118139	0.10548	0.056289	TRUE	FALSE	FALSE	FALSE	410.4	461.61	5.64	6.27	0	0	1.14	23.68	18.24	0	0	23
14:50:13	1179.46	1092.1	87.3648	0	0	0	0	0	0	0.292409	0.229451	-0.000587757	0.00429514	0.00316484	0.00533502	-0.00140157	0.514525	0.11832	0.105615	0.0563342	TRUE	FALSE	FALSE	FALSE	410.4	461.61	5.64	6.27	0	0	1.14	23.68	18.23	0	0	23
14:50:14	1179.46	1092.1	98.2856	0	0	0	0	0	0	0.292409	0.229677	-0.000678181	0.00429514	0.0033909	0.00528981	-0.00135636	0.514118	0.11832	0.105661	0.056289	TRUE	FALSE	FALSE	FALSE	410.1	461.61	5.64	6.27	0	0	1.14	23.68	18.23	0	0	23
14:50:15	1179.46	1092.1	98.2856	0	0	0	0	0	0	0.29207	0.229338	-0.000768605	0.00429514	0.00316484	0.00528981	-0.00140157	0.513756	0.118456	0.105661	0.0563342	TRUE	FALSE	FALSE	FALSE	410.1	461.61	5.64	6.27	0	0	1.14	23.68	18.22	0	0	23
14:50:16	1179.46	1092.1	98.2856	0	0	0	0	0	0	0.291844	0.228999	-0.000678181	0.00429514	0.00305181	0.00533502	-0.00140157	0.513485	0.118682	0.10557	0.0563342	TRUE	FALSE	FALSE	FALSE	409.97	461.61	5.64	6.27	0	0	1.13	23.68	18.22	0	0	23
14:50:17	1168.54	1092.1	98.2856	0	0	0	0	0	0	0.292409	0.22979	-0.000632969	0.00429514	0.00327787	0.00533502	-0.00140157	0.513123	0.118727	0.105525	0.0563794	TRUE	FALSE	FALSE	FALSE	409.97	461.61	5.64	6.27	0	0	1.13	23.68	18.21	0	0	23
14:50:18	1179.46	1092.1	98.2856	0	0	0	0	0	0	0.292296	0.229564	-0.000587757	0.00429514	0.00305181	0.00528981	-0.00140157	0.512716	0.118772	0.105525	0.0563794	TRUE	FALSE	FALSE	FALSE	409.97	461.61	5.64	6.27	0	0	1.13	23.68	18.21	0	0	23
14:50:19	1179.46	1092.1	98.2856	0	0	0	0	0	0	0.291731	0.229225	-0.000678181	0.00429514	0.00327787	0.00533502	-0.00135636	0.512219	0.118998	0.105615	0.056289	TRUE	FALSE	FALSE	FALSE	409.97	461.61	5.64	6.27	0	0	1.13	23.68	18.21	0	0	23
14:50:20	1179.46	1103.02	98.2856	0	0	0	0	0	0	0.29207	0.229338	-0.000723393	0.00429514	0.00327787	0.00533502	-0.00140157	0.512129	0.118998	0.105615	0.0563342	TRUE	FALSE	FALSE	FALSE	409.97	457.71	5.64	6.27	0	0	1.13	23.68	18.21	0	0	23
14:50:21	1168.54	1092.1	98.2856	0	0	0	0	0	0	0.29207	0.229225	-0.000678181	0.00429514	0.00305181	0.00533502	-0.00144678	0.511722	0.119179	0.105615	0.0563342	TRUE	FALSE	FALSE	FALSE	409.97	457.71	5.64	6.26	0	0	1.13	23.68	18.21	0	0	23
14:50:22	1179.46	1092.1	98.2856	0	0	0	0	0	0	0.292183	0.229338	-0.000768605	0.00429514	0.00305181	0.00533502	-0.00135636	0.51127	0.119134	0.105615	0.0563342	TRUE	FALSE	FALSE	FALSE	409.97	457.51	5.64	6.26	0	0	1.13	23.68	18.21	0	0	23
14:50:23	1179.46	1092.1	98.2856	0	0	0	0	0	0	0.29207	0.229564	-0.000723393	0.00440817	0.00305181	0.00528981	-0.00140157	0.511224	0.119224	0.105661	0.056289	TRUE	FALSE	FALSE	FALSE	409.97	457.51	5.64	6.26	0	0	1.13	23.68	18.21	0	0	23
14:50:24	1179.46	1092.1	98.2856	0	0	0	0	0	0	0.29207	0.229451	-0.000678181	0.00429514	0.00327787	0.00533502	-0.00140157	0.510546	0.119495	0.10557	0.0563342	TRUE	FALSE	FALSE	FALSE	409.97	457.1	5.64	6.26	0	0	1.13	23.68	18.21	0	0	23
14:50:25	1179.46	1092.1	98.2856	0	0	0	0	0	0	0.292183	0.229451	-0.000497333	0.00429514	0.00293878	0.00528981	-0.00140157	0.51032	0.119495	0.10557	0.056289	TRUE	FALSE	FALSE	FALSE	409.97	457.1	5.64	6.26	0	0	1.13	23.68	18.21	0	0	23
14:50:26	1168.54	1092.1	98.2856	0	0	0	0	0	0	0.292974	0.229903	-0.000678181	0.00418211	0.00316484	0.00528981	-0.00140157	0.510094	0.11945	0.10557	0.0563342	TRUE	FALSE	FALSE	FALSE	409.97	456.62	5.64	6.26	0	0	1.13	24.05	18.21	0	0	23
14:50:27	1179.46	1092.1	98.2856	0	0	0	0	0	0	0.292522	0.22979	-0.000678181	0.00429514	0.00316484	0.00533502	-0.00140157	0.509642	0.119767	0.105615	0.0563342	TRUE	FALSE	FALSE	FALSE	409.97	456.62	5.64	6.26	0	0	1.13	24.05	18.21	0	0	23
14:50:28	1179.46	1092.1	98.2856	0	0	0	0	0	0	0.292409	0.229564	-0.000632969	0.00418211	0.00316484	0.00528981	-0.00144678	0.509325	0.119993	0.105615	0.0563342	TRUE	FALSE	FALSE	FALSE	409.97	456.62	5.64	6.26	0	0	1.13	24.11	18.21	0	0	23
14:50:29	1179.46	1092.1	87.3648	0	0	0	0	0	0	0.292296	0.229677	-0.000768605	0.0344742	0.00892938	0.00528981	-0.00140157	0.508647	0.119721	0.105841	0.0564698	TRUE	TRUE	FALSE	FALSE	409.97	456.62	5.64	6.26	0	0	1.13	24.11	18.21	0	0	23
14:50:30	1179.46	1092.1	98.2856	425.912	32.7614	141.969	0	0	0	0.292296	0.229677	-0.000632969	0.0986753	0.0568541	0.00533502	-0.00140157	0.508466	0.119405	0.105525	0.056289	TRUE	TRUE	FALSE	FALSE	409.63	456.62	5.64	6.26	0	0	1.13	24.17	18.21	0	0	23
14:50:31	1179.46	1092.1	98.2856	677.095	196.573	141.969	0	0	0	0.291844	0.229338	-0.000678181	0.179266	0.14434	0.00538023	-0.00140157	0.508195	0.118908	0.10548	0.0563342	TRUE	TRUE	FALSE	FALSE	409.63	456.62	5.58	6.26	0	0	1.13	24.17	18.14	0	0	23
14:50:32	1179.46	1092.1	98.2856	644.332	349.465	98.2856	0	0	0	0.291957	0.229564	-0.000406908	0.25217	0.215888	0.00538023	-0.00140157	0.507653	0.118591	0.105525	0.0563342	TRUE	TRUE	FALSE	FALSE	409.59	456.62	5.58	6.26	0	0	1.13	24.23	18.14	0	0	23
14:50:33	1168.54	1092.1	98.2856	622.49	447.754	109.206	0	0	0	0.292183	0.229677	-0.000632969	0.281897	0.248101	0.00538023	-0.00140157	0.507698	0.117868	0.105796	0.0563342	TRUE	TRUE	FALSE	FALSE	409.59	456.62	5.59	6.26	0	0.35	1.13	24.23	18.13	0	0	23
14:50:34	1179.46	1092.1	98.2856	600.648	480.517	87.3648	0	0	0	0.29207	0.229451	-0.00045212	0.290826	0.25703	0.00538023	-0.00144678	0.50702	0.118003	0.105615	0.056289	TRUE	TRUE	FALSE	FALSE	410.02	456.62	5.59	6.26	0	0.35	1.13	24.23	18.13	0	0	23
14:50:35	1179.46	1092.1	98.2856	600.648	502.359	98.2856	0	0	0	0.291957	0.229112	-0.000768605	0.293087	0.259404	0.00533502	-0.00140157	0.506794	0.11728	0.105751	0.0563794	TRUE	TRUE	FALSE	FALSE	410.02	456.62	5.58	6.26	0	3.06	1.13	24.23	18.13	0	0	23
14:50:36	1179.46	1092.1	98.2856	589.727	502.359	87.3648	0	0	0	0.291731	0.228999	-0.000632969	0.293765	0.259969	0.00533502	-0.00140157	0.506477	0.117009	0.105661	0.0563342	TRUE	TRUE	FALSE	FALSE	409.88	456.62	5.58	6.26	0	3.06	1.12	24.23	18.13	0	0	23
14:50:37	1179.46	1092.1	98.2856	600.648	513.28	98.2856	0	0	0	0.291844	0.229225	-0.000678181	0.293991	0.260082	0.00528981	-0.00140157	0.506025	0.116511	0.105661	0.056289	TRUE	TRUE	FALSE	FALSE	409.88	456.62	5.57	6.26	0	3.04	1.12	24.23	18.11	0	0	23
14:50:38	1179.46	1092.1	98.2856	600.648	502.359	87.3648	0	0	0	0.29207	0.229451	-0.000406908	0.293765	0.260195	0.00538023	-0.00140157	0.505482	0.115924	0.105977	0.0563342	TRUE	TRUE	FALSE	FALSE	409.88	456.62	5.57	6.26	0	3.04	1.13	24.23	18.11	0	0	23
14:50:39	1179.46	1092.1	98.2856	589.727	502.359	87.3648	0	0	0	0.29207	0.229451	-0.000587757	0.294104	0.260195	0.00538023	-0.00140157	0.505663	0.115698	0.105841	0.0562438	TRUE	TRUE	FALSE	FALSE	409.88	456.62	5.57	6.26	0	3.04	1.13	24.23	18.11	0	0	23
14:50:40	1179.46	1092.1	98.2856	600.648	502.359	98.2856	0	0	0	0.291844	0.229338	-0.000678181	0.293765	0.260082	0.00542545	-0.00144678	0.50503	0.115652	0.105841	0.056289	TRUE	TRUE	FALSE	FALSE	409.88	453.56	5.57	6.26	0	3.04	1.13	24.23	18.11	0	0	23
14:50:41	1179.46	1092.1	98.2856	589.727	502.359	87.3648	0	0	0	0.292183	0.229225	-0.000678181	0.293878	0.260195	0.00533502	-0.00144678	0.504578	0.114748	0.106022	0.056289	TRUE	TRUE	FALSE	FALSE	409.88	453.56	5.57	6.18	6.91	3.04	1.13	24.23	18.11	0	0	23
14:50:42	1179.46	1092.1	98.2856	600.648	513.28	87.3648	0	0	0	0.291844	0.229112	-0.000587757	0.293765	0.260195	0.00538023	-0.00135636	0.504804	0.114477	0.106022	0.0563342	TRUE	TRUE	FALSE	FALSE	409.88	453.25	5.57	6.18	6.91	3.04	1.13	24.23	18.11	0	0	23
14:50:43	1179.46	1092.1	98.2856	589.727	502.359	98.2856	0	0	0	0.291844	0.229112	-0.000632969	0.293539	0.260082	0.00542545	-0.00135636	0.504669	0.11407	0.106339	0.0563342	TRUE	TRUE	FALSE	FALSE	409.88	453.25	5.57	6.18	6.8	3.04	1.13	24.23	18.11	0	0	23
14:50:44	1179.46	1092.1	98.2856	600.648	502.359	87.3648	0	0	0	0.291957	0.229338	-0.000632969	0.293539	0.259856	0.00538023	-0.00140157	0.504171	0.113618	0.106293	0.056289	TRUE	TRUE	FALSE	FALSE	409.88	452.97	5.57	6.18	6.8	3.04	1.13	24.23	18.11	0	0	23
14:50:45	1168.54	1092.1	98.2856	600.648	502.359	87.3648	0	0	0	0.291731	0.229225	-0.000632969	0.293539	0.25963	0.00542545	-0.00140157	0.504036	0.113211	0.106565	0.0562438	TRUE	TRUE	FALSE	FALSE	409.88	452.97	5.57	6.18	6.82	3.04	1.13	24.23	18.11	0	0	23
14:50:46	1179.46	1103.02	98.2856	589.727	513.28	98.2856	0	0	0	0.292183	0.229112	-0.000678181	0.293313	0.259743	0.00542545	-0.00144678	0.504036	0.11303	0.106746	0.0562438	TRUE	TRUE	FALSE	FALSE	409.88	452.58	5.57	6.18	6.82	3.04	1.13	24.27	18.11	0	0	23
14:50:47	1179.46	1092.1	98.2856	589.727	502.359	87.3648	0	0	0	0.291844	0.229338	-0.000723393	0.293652	0.259856	0.00533502	-0.00144678	0.50381	0.112397	0.106791	0.0563342	TRUE	TRUE	FALSE	FALSE	409.88	452.58	5.57	6.17	6.83	3.04	1.13	24.27	18.11	0	0	23
14:50:48	1179.46	1092.1	98.2856	600.648	502.359	87.3648	0	0	0	0.29207	0.229564	-0.000632969	0.293313	0.25963	0.00542545	-0.00144678	0.503719	0.111855	0.106565	0.056289	TRUE	TRUE	FALSE	FALSE	409.88	452.58	5.57	6.17	6.83	3.04	1.13	24.31	18.11	0	0	23
14:50:49	1179.46	1092.1	98.2856	589.727	502.359	87.3648	0	0	0	0.29207	0.229451	-0.000632969	0.293087	0.25963	0.00538023	-0.00140157	0.503538	0.111176	0.106881	0.0563342	TRUE	TRUE	FALSE	FALSE	409.88	452.58	5.57	6.17	6.83	3.04	1.13	24.31	18.11	0	0	23
14:50:50	1179.46	1092.1	98.2856	600.648	513.28	98.2856	0	0	0	0.291957	0.229338	-0.000768605	0.293087	0.259517	0.00538023	-0.00144678	0.503312	0.110905	0.106836	0.056289	TRUE	TRUE	FALSE	FALSE	409.92	452.58	5.57	6.17	6.83	3.04	1.13	24.35	18.11	0	0	23
14:50:51	1179.46	1092.1	98.2856	589.727	502.359	87.3648	0	0	0	0.291957	0.229225	-0.000723393	0.293426	0.259517	0.00538023	-0.00144678	0.503267	0.110408	0.107107	0.0563342	TRUE	TRUE	FALSE	FALSE	409.92	452.58	5.52	6.17	6.83	2.89	1.13	24.35	18.04	0	0	23
14:50:52	1179.46	1092.1	98.2856	600.648	502.359	87.3648	0	0	0	0.291957	0.229451	-0.000723393	0.293087	0.259404	0.00542545	-0.00144678	0.503086	0.110091	0.107107	0.0563794	TRUE	TRUE	FALSE	FALSE	409.56	452.58	5.52	6.17	6.83	2.89	1.13	24.38	18.04	0	0	23
14:50:53	1179.46	1092.1	98.2856	600.648	513.28	98.2856	0	0	0	0.292748	0.229903	-0.000904241	0.293087	0.25963	0.00538023	-0.00144678	0.502905	0.109323	0.107288	0.0563342	TRUE	TRUE	FALSE	FALSE	409.56	452.58	5.52	6.17	6.83	2.87	1.13	24.38	18.03	0	0	23
14:50:54	1179.46	1092.1	98.2856	589.727	502.359	87.3648	0	0	0	0.292296	0.229677	-0.000768605	0.293087	0.259404	0.00538023	-0.00144678	0.503041	0.109006	0.107198	0.0563342	TRUE	TRUE	FALSE	FALSE	409.61	452.58	5.52	6.17	6.83	2.87	1.13	24.38	18.03	0	0	23
14:50:55	1179.46	1092.1	98.2856	600.648	502.359	87.3648	0	0	0	0.291844	0.229451	-0.000632969	0.292861	0.259065	0.00538023	-0.00144678	0.50277	0.108554	0.107379	0.0563342	TRUE	TRUE	FALSE	FALSE	409.61	452.58	5.52	6.17	6.83	2.85	1.13	24.38	18.02	0	0	23
14:50:56	1179.46	1092.1	87.3648	600.648	513.28	87.3648	0	0	0	0.291957	0.229564	-0.000813817	0.292748	0.258952	0.00538023	-0.00135636	0.502453	0.108645	0.107514	0.056289	TRUE	TRUE	FALSE	FALSE	409.68	452.58	5.52	6.17	6.83	2.85	1.12	24.38	18.02	0	0	23
14:50:57	1179.46	1092.1	98.2856	589.727	502.359	98.2856	0	0	0	0.29207	0.229225	-0.000768605	0.292861	0.258952	0.00542545	-0.00144678	0.502498	0.107966	0.10756	0.0563342	TRUE	TRUE	FALSE	FALSE	409.68	452.58	5.52	6.17	6.83	2.84	1.12	24.38	18.01	0	0	23
14:50:58	1168.54	1092.1	98.2856	600.648	502.359	87.3648	0	0	0	0.291957	0.229338	-0.000859029	0.292522	0.258952	0.00538023	-0.00144678	0.502317	0.107605	0.107695	0.056289	TRUE	TRUE	FALSE	FALSE	409.68	452.58	5.52	6.17	6.83	2.84	1.13	24.38	18.01	0	0	23
14:50:59	1179.46	1092.1	98.2856	589.727	513.28	87.3648	0	0	0	0.291844	0.229225	-0.000723393	0.292635	0.258839	0.00533502	-0.00140157	0.502046	0.107152	0.107876	0.0563794	TRUE	TRUE	FALSE	FALSE	409.68	452.58	5.52	6.17	6.83	2.84	1.13	24.38	18.01	0	0	23
14:51:00	1179.46	1092.1	98.2856	600.648	502.359	87.3648	0	0	0	0.291957	0.229338	-0.000904241	0.292635	0.258952	0.00542545	-0.00144678	0.502182	0.106881	0.108057	0.056289	TRUE	TRUE	FALSE	FALSE	409.68	452.58	5.52	6.17	6.83	2.84	1.13	24.38	18.01	0	0	23
14:51:01	1179.46	1092.1	98.2856	589.727	513.28	98.2856	0	0	0	0.291731	0.229112	-0.000768605	0.292635	0.258726	0.00538023	-0.00144678	0.501911	0.106248	0.108102	0.056289	TRUE	TRUE	FALSE	FALSE	409.68	450.55	5.52	6.17	6.91	2.84	1.13	24.38	18.01	0	0	23
14:51:02	1179.46	1092.1	98.2856	600.648	502.359	87.3648	0	0	0	0.291957	0.229338	-0.000768605	0.292522	0.258613	0.00542545	-0.00140157	0.501685	0.105796	0.108102	0.0563342	TRUE	TRUE	FALSE	FALSE	409.68	450.55	5.52	6.17	6.91	2.84	1.13	24.38	18.01	0	0	23
14:51:03	1179.46	1092.1	98.2856	589.727	502.359	87.3648	0	0	0	0.29207	0.229564	-0.000723393	0.292409	0.258613	0.00538023	-0.00140157	0.501549	0.105661	0.108147	0.056289	TRUE	TRUE	FALSE	FALSE	409.68	450.32	5.52	6.17	6.93	2.84	1.13	24.38	18.01	0	0	23
14:51:04	1179.46	1092.1	98.2856	600.648	513.28	87.3648	0	0	0	0.29207	0.229338	-0.000813817	0.292409	0.258613	0.00538023	-0.00140157	0.501368	0.105118	0.108373	0.0563342	TRUE	TRUE	FALSE	FALSE	409.68	450.32	5.52	6.17	6.93	2.84	1.13	24.38	18.01	0	0	23
14:51:05	1179.46	1092.1	98.2856	589.727	502.359	98.2856	0	0	0	0.291844	0.229225	-0.000632969	0.292296	0.2585	0.00542545	-0.00144678	0.501368	0.104892	0.108735	0.0562438	TRUE	TRUE	FALSE	FALSE	409.68	450.1	5.52	6.17	6.95	2.84	1.13	24.38	18.01	0	0	23
14:51:06	1168.54	1092.1	98.2856	600.648	502.359	87.3648	0	0	0	0.29207	0.229338	-0.000542545	0.292183	0.2585	0.00542545	-0.00144678	0.501232	0.104485	0.108554	0.056289	TRUE	TRUE	FALSE	FALSE	409.68	450.1	5.52	6.17	6.95	2.84	1.13	24.48	18.01	0	0	23
14:51:07	1179.46	1092.1	98.2856	589.727	513.28	87.3648	0	0	0	0.291957	0.229225	-0.000587757	0.292183	0.258387	0.00538023	-0.00140157	0.50078	0.104033	0.108599	0.0563342	TRUE	TRUE	FALSE	FALSE	409.68	449.89	5.52	6.17	6.98	2.84	1.13	24.48	18.01	0	0	23
14:51:08	1179.46	1092.1	98.2856	600.648	502.359	87.3648	0	0	0	0.291957	0.229451	-0.000813817	0.292183	0.258274	0.00542545	-0.00140157	0.500961	0.103626	0.108645	0.056289	TRUE	TRUE	FALSE	FALSE	409.68	449.89	5.52	6.17	6.98	2.84	1.13	24.41	18.01	0	0	23
14:51:09	1179.46	1092.1	98.2856	600.648	513.28	98.2856	0	0	0	0.29207	0.229564	-0.000768605	0.29207	0.258161	0.00538023	-0.00144678	0.500826	0.103219	0.108916	0.0562438	TRUE	TRUE	FALSE	FALSE	409.68	449.89	5.52	6.17	6.98	2.84	1.13	24.41	18.01	0	0	23
14:51:10	1179.46	1092.1	98.2856	589.727	502.359	87.3648	0	0	0	0.291844	0.229338	-0.000859029	0.292183	0.258274	0.00542545	-0.00140157	0.501006	0.102948	0.108961	0.056289	TRUE	TRUE	FALSE	FALSE	409.68	449.89	5.52	6.17	6.98	2.84	1.13	24.43	18.01	0	0	23
14:51:11	1179.46	1092.1	98.2856	600.648	502.359	87.3648	0	0	0	0.291957	0.229338	-0.000904241	0.291844	0.258048	0.00542545	-0.00140157	0.500193	0.102496	0.109277	0.056289	TRUE	TRUE	FALSE	FALSE	406.57	449.89	5.47	6.17	6.98	2.94	1.13	24.43	17.94	0	0	23
14:51:12	1179.46	1092.1	98.2856	589.727	513.28	87.3648	0	0	0	0.292183	0.229451	-0.000723393	0.291844	0.257935	0.00542545	-0.00140157	0.500328	0.102089	0.109277	0.056289	TRUE	TRUE	FALSE	FALSE	406.78	449.89	5.47	6.17	6.98	2.94	1.13	24.43	17.94	0	0	23
14:51:13	1179.46	1092.1	98.2856	600.648	502.359	87.3648	0	0	0	0.291844	0.229225	-0.000723393	0.291844	0.257822	0.00542545	-0.00144678	0.500193	0.101818	0.109187	0.056289	TRUE	TRUE	FALSE	FALSE	406.78	449.89	5.47	6.17	6.98	2.98	1.13	24.45	17.92	0	0	23
14:51:14	1179.46	1092.1	98.2856	589.727	513.28	98.2856	0	0	0	0.291957	0.228999	-0.000632969	0.291731	0.257822	0.00542545	-0.00140157	0.499966	0.10123	0.109413	0.056289	TRUE	TRUE	FALSE	FALSE	406.73	449.89	5.46	6.17	6.98	2.98	1.13	24.45	17.92	0	0	23
14:51:15	1179.46	1092.1	98.2856	600.648	502.359	87.3648	0	0	0	0.291844	0.229225	-0.000678181	0.291618	0.257709	0.00538023	-0.00140157	0.49965	0.100959	0.109413	0.056289	TRUE	TRUE	FALSE	FALSE	406.73	449.89	5.46	6.17	6.98	3.03	1.13	24.45	17.91	0	0	23
14:51:16	1179.46	1092.1	98.2856	600.648	513.28	87.3648	0	0	0	0.291618	0.229225	-0.000859029	0.291505	0.257709	0.00542545	-0.00144678	0.499966	0.100416	0.10973	0.056289	TRUE	TRUE	FALSE	FALSE	406.73	449.89	5.46	6.17	6.98	3.03	1.13	24.45	17.91	0	0	23
14:51:17	1179.46	1092.1	98.2856	589.727	502.359	87.3648	0	0	0	0.291844	0.229112	-0.000723393	0.248101	0.228886	0.00542545	-0.00144678	0.499831	0.100099	0.109549	0.0563342	TRUE	FALSE	FALSE	FALSE	405.21	449.89	5.46	6.17	6.98	3.06	1.12	24.45	17.9	0	0	23
14:51:18	1179.46	1092.1	98.2856	414.991	491.438	65.5234	0	0	0	0.291731	0.228886	-0.000768605	0.0701917	0.0683832	0.00538023	-0.001492	0.499921	0.0999186	0.109865	0.0562438	TRUE	FALSE	FALSE	FALSE	405.21	449.89	5.45	6.17	6.98	3.06	1.12	24.45	17.9	0	0	23
14:51:19	1168.54	1092.1	98.2856	10.9203	294.861	0	0	0	0	0.29207	0.229677	-0.000859029	0.0289357	0.0280315	0.00533502	-0.00144678	0.499243	0.100506	0.110046	0.056289	TRUE	FALSE	FALSE	FALSE	405.21	449.89	5.45	6.17	6.98	3.06	1.13	24.45	17.9	0	0	23
14:51:20	1179.46	1092.1	98.2856	0	163.81	0	0	0	0	0.291957	0.229338	-0.000813817	0.0148069	0.0160503	0.00538023	-0.00144678	0.499017	0.100416	0.110001	0.0562438	TRUE	FALSE	FALSE	FALSE	405.21	449.89	5.45	6.17	6.98	3.06	1.13	24.45	17.9	0	0	23
14:51:21	1179.46	1092.1	98.2856	0	98.2856	0	0	0	0	0.291957	0.229451	-0.000768605	0.0093815	0.00847726	0.00538023	-0.00144678	0.498746	0.100552	0.110001	0.056289	TRUE	FALSE	FALSE	FALSE	405.21	448.29	5.45	6.17	7.05	3.06	1.13	24.45	17.9	0	0	23
14:51:22	1179.46	1092.1	98.2856	0	54.6027	0	0	0	0	0.291731	0.229112	-0.000587757	0.00542545	0.00429514	0.00533502	-0.00144678	0.498565	0.100687	0.109956	0.0563342	TRUE	FALSE	FALSE	FALSE	405.21	448.29	5.45	6.16	7.05	3.06	1.13	24.45	17.9	0	0	23
14:51:23	1179.46	1092.1	98.2856	0	0	0	0	0	0	0.291731	0.228999	-0.000632969	0.00395605	0.00214757	0.00533502	-0.00144678	0.498384	0.100732	0.110136	0.056289	TRUE	FALSE	FALSE	FALSE	405.21	448.15	5.45	6.16	7.05	3.06	1.13	24.45	17.9	0	0	23
14:51:24	1179.46	1092.1	98.2856	0	0	0	0	0	0	0.291392	0.228999	-0.000723393	0.00316484	0.00158242	0.00533502	-0.00144678	0.498248	0.100642	0.110136	0.0562438	TRUE	FALSE	FALSE	FALSE	405.21	448.15	5.45	6.16	7.05	3.06	1.13	24.45	17.9	0	0	23
14:51:25	1179.46	1092.1	98.2856	0	0	0	0	0	0	0.291618	0.229112	-0.000632969	0.00282575	0.0011303	0.00538023	-0.00144678	0.49861	0.100959	0.110227	0.0562438	TRUE	FALSE	FALSE	FALSE	405.21	447.98	5.45	6.16	7.03	3.06	1.13	24.45	17.9	0	0	23
14:51:26	1179.46	1092.1	98.2856	0	0	0	0	0	0	0.291731	0.228999	-0.000632969	0.00259969	0.000791211	0.00533502	-0.00144678	0.49861	0.100959	0.110136	0.056289	TRUE	FALSE	FALSE	FALSE	405.21	447.98	5.45	6.17	7.03	3.06	1.13	24.45	17.9	0	0	23
14:51:27	1179.46	1092.1	98.2856	0	0	0	0	0	0	0.291279	0.228773	-0.000859029	0.00248666	0.000565151	0.00538023	-0.00144678	0.498022	0.101139	0.110136	0.0563342	TRUE	FALSE	FALSE	FALSE	405.21	447.78	5.45	6.17	7.03	3.06	1.13	24.45	17.9	0	0	23
14:51:28	1179.46	1092.1	98.2856	0	0	0	0	0	0	0.291392	0.228886	-0.000632969	0.0022606	0.000565151	0.00533502	-0.00144678	0.498339	0.101275	0.110227	0.0563342	TRUE	FALSE	FALSE	FALSE	405.21	447.78	5.45	6.17	7.03	3.06	1.13	24.45	17.9	0	0	23
14:51:29	1179.46	1092.1	98.2856	0	0	0	0	0	0	0.291279	0.228886	-0.000768605	0.0022606	0.00022606	0.00538023	-0.00144678	0.498339	0.101365	0.110136	0.0562438	TRUE	FALSE	FALSE	FALSE	405.21	447.78	5.45	6.17	7.03	3.06	1.13	24.29	17.9	0	0	23
14:51:30	1168.54	1092.1	98.2856	0	0	0	0	0	0	0.291392	0.228999	-0.000723393	0.0022606	0.00022606	0.00533502	-0.00144678	0.498158	0.101411	0.110182	0.056289	TRUE	FALSE	FALSE	FALSE	405.21	447.78	5.45	6.17	7.03	3.06	1.13	24.29	17.9	0	0	23
14:51:31	1179.46	1092.1	98.2856	0	0	0	0	0	0	0.291505	0.228886	-0.000632969	0.0022606	0.00022606	0.00533502	-0.00140157	0.498113	0.101501	0.110182	0.056289	TRUE	FALSE	FALSE	FALSE	398.6	447.78	5.45	6.17	7.03	0	1.13	24.3	17.9	0	0	23
14:51:32	1179.46	1092.1	98.2856	0	0	0	0	0	0	0.291505	0.228773	-0.000632969	0.00214757	0.00011303	0.00533502	-0.001492	0.498113	0.101637	0.110272	0.056289	TRUE	FALSE	FALSE	FALSE	398.6	447.78	5.41	6.17	7.03	0	1.13	24.3	17.83	0	0	23
14:51:33	1168.54	1092.1	98.2856	0	0	0	0	0	0	0.291618	0.228886	-0.000768605	0.00214757	0.00022606	0.00533502	-0.001492	0.497887	0.101818	0.110091	0.056289	TRUE	FALSE	FALSE	FALSE	398.16	447.78	5.41	6.17	7.03	0	1.13	24.31	17.83	0	0	23
14:51:34	1179.46	1092.1	98.2856	0	0	0	0	0	0	0.291392	0.228773	-0.00045212	0.00214757	0.00011303	0.00533502	-0.001492	0.498158	0.101727	0.110227	0.056289	TRUE	FALSE	FALSE	FALSE	398.16	447.78	5.4	6.17	7.03	0	1.13	24.31	17.82	0	0	23
14:51:35	1179.46	1092.1	98.2856	0	0	0	0	0	0	0.291505	0.228886	-0.000723393	0.00214757	0.00011303	0.00533502	-0.00144678	0.497887	0.101818	0.110227	0.056289	TRUE	FALSE	FALSE	FALSE	402.01	447.78	5.4	6.17	7.03	0	1.13	24.31	17.82	0	0	23
14:51:36	1168.54	1092.1	98.2856	0	0	0	0	0	0	0.291166	0.228547	-0.000678181	0.00214757	0	0.00533502	-0.00144678	0.498248	0.101908	0.110227	0.056289	TRUE	FALSE	FALSE	FALSE	402.01	447.78	5.4	6.17	7.03	0	1.13	24.31	17.8	0	0	23
14:51:37	1179.46	1081.17	98.2856	0	0	0	0	0	0	0.291279	0.228773	-0.00117551	0.00214757	0.00022606	0.00538023	-0.00144678	0.498068	0.102044	0.110182	0.056289	TRUE	FALSE	FALSE	FALSE	399.12	447.78	5.4	6.17	7.03	0	1.12	24.31	17.8	0	0	23
14:51:38	1179.46	1092.1	98.2856	0	0	0	0	0	0	0.291505	0.228886	-0.000632969	0.0022606	0.00022606	0.00533502	-0.00144678	0.498113	0.102179	0.110136	0.056289	TRUE	FALSE	FALSE	FALSE	399.12	447.78	5.4	6.17	7.03	0	1.12	24.31	17.79	0	0	23
14:51:39	1179.46	1092.1	98.2856	0	0	0	0	0	0	0.291392	0.229112	-0.000768605	0.00214757	0.00022606	0.00533502	-0.00144678	0.498248	0.102224	0.110136	0.056289	TRUE	FALSE	FALSE	FALSE	399.12	447.78	5.4	6.17	7.03	0	1.12	24.31	17.79	0	0	23
14:51:40	1168.54	1092.1	98.2856	0	0	0	0	0	0	0.291731	0.229225	-0.000994665	0.00237363	0.000565151	0.00538023	-0.00144678	0.498113	0.102224	0.110182	0.0563342	TRUE	FALSE	FALSE	FALSE	399.12	447.78	5.4	6.17	7.03	0	1.12	24.31	17.79	0	0	23
14:51:41	1179.46	1092.1	98.2856	0	0	0	0	0	0	0.291618	0.229225	-0.000723393	0.00293878	0.00135636	0.00538023	-0.00140157	0.498203	0.10227	0.110182	0.056289	TRUE	FALSE	FALSE	FALSE	399.12	446.57	5.4	6.17	7.03	0	1.12	24.31	17.79	0	0	23
14:51:42	1179.46	1092.1	98.2856	0	0	0	0	0	0	0.291166	0.22866	-0.000859029	0.00395605	0.00282575	0.00533502	-0.00144678	0.498158	0.102496	0.110136	0.0563342	TRUE	FALSE	FALSE	FALSE	399.12	446.57	5.4	6.17	7.03	0	1.12	24.31	17.79	0	0	23
14:51:43	1179.46	1092.1	98.2856	0	0	0	0	0	0	0.291279	0.228773	-0.000768605	0.00463423	0.00372999	0.00533502	-0.00144678	0.498655	0.102677	0.110272	0.056289	TRUE	FALSE	FALSE	FALSE	399.12	446.48	5.4	6.17	7.04	0	1.12	24.31	17.79	0	0	23
14:51:44	1168.54	1092.1	98.2856	0	0	0	0	0	0	0.291279	0.22866	-0.000768605	0.00553848	0.00531242	0.00538023	-0.00144678	0.498203	0.102767	0.110227	0.056289	TRUE	FALSE	FALSE	FALSE	399.12	446.48	5.4	6.17	7.04	0	1.12	24.31	17.79	0	0	23
14:51:45	1179.46	1092.1	87.3648	0	0	0	0	0	0	0.291053	0.228773	-0.000678181	0.0071209	0.00689484	0.00538023	-0.00144678	0.498022	0.102767	0.110091	0.056289	TRUE	FALSE	FALSE	FALSE	399.12	446.32	5.4	6.17	7.04	0	1.12	24.31	17.79	0	0	23
14:51:46	1179.46	1092.1	98.2856	0	0	0	0	0	0	0.291053	0.22866	-0.000542545	0.00859029	0.0082512	0.00533502	-0.00144678	0.498339	0.102948	0.110182	0.0562438	TRUE	FALSE	FALSE	FALSE	399.12	446.32	5.4	6.17	7.04	0	1.12	24.31	17.79	0	0	23
14:51:47	1179.46	1092.1	98.2856	0	0	0	0	0	0	0.291505	0.228999	-0.000859029	0.00892938	0.00904241	0.00533502	-0.00144678	0.498022	0.102903	0.110272	0.056289	TRUE	FALSE	FALSE	FALSE	399.12	446.27	5.4	6.17	7.04	0	1.12	24.16	17.79	0	0	23
14:51:48	1179.46	1092.1	98.2856	0	0	0	0	0	0	0.291279	0.228773	-0.000632969	0.00904241	0.00881635	0.00538023	-0.00144678	0.497842	0.103445	0.110136	0.0562438	TRUE	FALSE	FALSE	FALSE	399.12	446.27	5.4	6.17	7.04	0	1.12	24.16	17.79	0	0	23
14:51:49	1168.54	1092.1	98.2856	0	0	0	0	0	0	0.291166	0.228773	-0.000632969	0.00904241	0.00892938	0.00538023	-0.00144678	0.497842	0.103309	0.110136	0.056289	TRUE	FALSE	FALSE	FALSE	399.12	446.27	5.4	6.17	7.04	0	1.12	24.16	17.79	0	0	23
14:51:50	1179.46	1092.1	98.2856	0	0	0	0	0	0	0.291166	0.228886	-0.000497333	0.00892938	0.00881635	0.00533502	-0.00144678	0.498158	0.103264	0.110227	0.056289	TRUE	FALSE	FALSE	FALSE	399.12	446.27	5.4	6.17	7.04	0	1.12	24.16	17.79	0	0	23
14:51:51	1179.46	1081.17	98.2856	0	0	0	0	0	0	0.291279	0.228773	-0.000723393	0.00915544	0.00881635	0.00538023	-0.00144678	0.497977	0.103581	0.110227	0.0563342	TRUE	FALSE	FALSE	FALSE	400.63	446.27	5.4	6.17	7.04	0	1.12	24.16	17.79	0	0	23
14:51:52	1179.46	1092.1	98.2856	0	0	0	0	0	0	0.291279	0.228886	-0.000542545	0.00892938	0.00892938	0.00533502	-0.001492	0.497706	0.103445	0.110182	0.056289	TRUE	FALSE	FALSE	FALSE	400.63	446.27	5.37	6.17	7.04	0	1.12	24.16	17.71	0	0	23
14:51:53	1168.54	1092.1	98.2856	0	0	0	0	0	0	0.291166	0.228547	-0.000678181	0.00915544	0.00881635	0.00538023	-0.00144678	0.498203	0.103671	0.110136	0.056289	TRUE	FALSE	FALSE	FALSE	400.15	446.27	5.37	6.17	7.04	0	1.12	24.16	17.71	0	0	22.9
14:51:54	1179.46	1092.1	98.2856	0	0	0	0	0	0	0.291166	0.228886	-0.000723393	0.00915544	0.00881635	0.00538023	-0.00144678	0.497615	0.103897	0.110272	0.056289	TRUE	FALSE	FALSE	FALSE	400.15	446.27	5.36	6.17	7.04	0	1.12	24.16	17.7	0	0	22.9
14:51:55	1179.46	1092.1	98.2856	0	0	0	0	0	0	0.291279	0.228773	-0.000904241	0.00881635	0.00881635	0.00538023	-0.001492	0.497842	0.104123	0.110182	0.056289	TRUE	FALSE	FALSE	FALSE	400.83	446.27	5.36	6.17	7.04	0	1.12	24.16	17.7	0	0	22.9
14:51:56	1179.46	1092.1	98.2856	0	0	0	0	0	0	0.291279	0.22866	-0.000813817	0.00892938	0.00870332	0.00538023	-0.00144678	0.498068	0.104214	0.110136	0.056289	TRUE	FALSE	FALSE	FALSE	400.83	446.27	5.35	6.17	7.04	0	1.12	24.16	17.69	0	0	23
14:51:57	1168.54	1092.1	98.2856	0	0	0	0	0	0	0.291505	0.22866	-0.000859029	0.00892938	0.00881635	0.00538023	-0.00144678	0.497435	0.10444	0.110046	0.056289	TRUE	FALSE	FALSE	FALSE	400.29	446.27	5.35	6.17	7.04	0	1.12	24.16	17.69	0	0	22.9
14:51:58	1179.46	1092.1	98.2856	0	0	0	0	0	0	0.291392	0.228999	-0.000632969	0.00881635	0.00881635	0.00538023	-0.001492	0.497299	0.104485	0.110272	0.0561986	TRUE	FALSE	FALSE	FALSE	400.29	446.27	5.35	6.17	7.04	0	1.12	24.16	17.68	0	0	22.9
14:51:59	1179.46	1092.1	98.2856	0	0	0	0	0	0	0.291844	0.229225	-0.000859029	0.00881635	0.00881635	0.00533502	-0.00144678	0.497751	0.104621	0.110182	0.056289	TRUE	FALSE	FALSE	FALSE	400.29	446.27	5.35	6.17	7.04	0	1.12	24.16	17.68	0	0	22.9
14:52:00	1179.46	1092.1	98.2856	0	0	0	0	0	0	0.291731	0.228886	-0.000813817	0.00904241	0.00881635	0.00533502	-0.00144678	0.497706	0.104576	0.110091	0.056289	TRUE	FALSE	FALSE	FALSE	400.29	446.27	5.35	6.17	7.04	0	1.12	24.16	17.68	0	0	22.9
14:52:01	1179.46	1092.1	98.2856	0	0	0	0	0	0	0.291392	0.229112	-0.000678181	0.00892938	0.00881635	0.00533502	-0.00144678	0.497254	0.104847	0.110182	0.056289	TRUE	FALSE	FALSE	FALSE	400.29	446.19	5.35	6.17	7	0	1.12	24.16	17.68	0	0	22.9
14:52:02	1168.54	1092.1	98.2856	0	0	0	0	0	0	0.292183	0.228999	-0.000768605	0.00892938	0.00870332	0.00533502	-0.001492	0.496937	0.105118	0.110227	0.0563342	TRUE	FALSE	FALSE	FALSE	400.29	446.19	5.35	6.17	7	0	1.12	24.16	17.68	0	0	22.9
14:52:03	1179.46	1092.1	98.2856	0	0	0	0	0	0	0.29207	0.22979	-0.000994665	0.00881635	0.00881635	0.00533502	-0.00144678	0.497525	0.105073	0.110227	0.0563342	TRUE	FALSE	FALSE	FALSE	400.29	446.14	5.35	6.17	6.15	0	1.12	24.16	17.68	0	0	22.9
14:52:04	1190.38	1092.1	98.2856	0	0	0	0	0	0	0.29207	0.229338	-0.000904241	0.00881635	0.00870332	0.00533502	-0.001492	0.497163	0.105163	0.110227	0.0562438	TRUE	FALSE	FALSE	FALSE	400.29	446.14	5.35	6.17	6.15	0	1.12	24.16	17.68	0	0	22.9
14:52:05	1179.46	1092.1	98.2856	0	0	0	0	0	0	0.29207	0.229338	-0.000813817	0.00870332	0.00847726	0.00533502	-0.001492	0.497118	0.105344	0.110182	0.0563794	TRUE	FALSE	FALSE	FALSE	400.29	446.03	5.35	6.17	0	0	1.12	24.16	17.68	0	0	22.9
14:52:06	1168.54	1092.1	98.2856	0	0	0	0	0	0	0.291731	0.229112	-0.000723393	0.00859029	0.00836423	0.00538023	-0.001492	0.496847	0.105435	0.110272	0.0562438	TRUE	FALSE	FALSE	FALSE	400.29	446.03	5.35	6.17	0	0	1.12	24.16	17.68	0	0	22.9
14:52:07	1179.46	1092.1	98.2856	0	0	0	0	0	0	0.291618	0.228999	-0.000859029	0.00847726	0.0082512	0.00533502	-0.00144678	0.497028	0.10557	0.110227	0.056289	TRUE	FALSE	FALSE	FALSE	400.29	445.94	5.35	6.17	0	0	1.12	24.05	17.68	0	0	22.9
14:52:08	1179.46	1092.1	98.2856	0	0	0	0	0	0	0.291618	0.229112	-0.000859029	0.0082512	0.0082512	0.00528981	-0.001492	0.496756	0.105706	0.110227	0.056289	TRUE	FALSE	FALSE	FALSE	400.29	445.94	5.35	6.17	0	0	1.12	24.05	17.68	0	0	22.9
14:52:09	1179.46	1092.1	98.2856	0	0	0	0	0	0	0.291844	0.228999	-0.000859029	0.00836423	0.00813817	0.00533502	-0.001492	0.496621	0.105706	0.110136	0.0563342	TRUE	FALSE	FALSE	FALSE	400.29	445.94	5.35	6.17	0	0	1.12	24.05	17.68	0	0	22.9
14:52:10	1179.46	1092.1	98.2856	0	0	0	0	0	0	0.291618	0.229225	-0.000632969	0.00802514	0.00791211	0.00533502	-0.00144678	0.496485	0.105932	0.110227	0.0563342	TRUE	FALSE	FALSE	FALSE	400.29	445.94	5.35	6.17	0	0	1.12	24.05	17.68	0	0	22.9
14:52:11	1168.54	1092.1	98.2856	0	0	0	0	0	0	0.291731	0.229112	-0.000723393	0.00802514	0.00779908	0.00533502	-0.00144678	0.49653	0.105977	0.110227	0.056289	TRUE	FALSE	FALSE	FALSE	398.31	445.94	5.35	6.17	0	0	1.12	24.04	17.68	0	0	22.9
14:52:12	1179.46	1092.1	98.2856	0	0	0	0	0	0	0.291618	0.229112	-0.000768605	0.00779908	0.00768605	0.00538023	-0.001492	0.496169	0.106248	0.110182	0.056289	TRUE	FALSE	FALSE	FALSE	398.31	445.94	5.32	6.17	0	0	1.12	24.04	17.6	0	0	22.9
14:52:13	1179.46	1092.1	98.2856	0	0	0	0	0	0	0.291731	0.229112	-0.000813817	0.00779908	0.00757302	0.00538023	-0.00144678	0.496304	0.106474	0.110136	0.0562438	TRUE	FALSE	FALSE	FALSE	397.77	445.94	5.32	6.17	0	0	1.12	24.04	17.6	0	0	22.9
14:52:14	1179.46	1092.1	98.2856	0	0	0	0	0	0	0.291618	0.228999	-0.000723393	0.00779908	0.00757302	0.00538023	-0.00144678	0.496304	0.106429	0.110227	0.056289	TRUE	FALSE	FALSE	FALSE	397.77	445.94	5.31	6.17	0	0	1.12	24.04	17.59	0	0	22.9
14:52:15	1168.54	1092.1	98.2856	0	0	0	0	0	0	0.291392	0.228999	-0.000723393	0.00779908	0.00745999	0.00533502	-0.001492	0.495943	0.106791	0.110227	0.056289	TRUE	FALSE	FALSE	FALSE	398.21	445.94	5.31	6.17	0	0	1.12	24.04	17.59	0	0	22.9
14:52:16	1179.46	1092.1	98.2856	0	0	0	0	0	0	0.291392	0.228773	-0.000949453	0.00768605	0.00745999	0.00538023	-0.001492	0.49635	0.1067	0.110136	0.056289	TRUE	FALSE	FALSE	FALSE	398.21	445.94	5.31	6.17	0	0	1.12	24.04	17.58	0	0	22.9
14:52:17	1179.46	1092.1	98.2856	0	0	0	0	0	0	0.291618	0.228773	-0.000678181	0.00768605	0.00734696	0.00538023	-0.00144678	0.496123	0.106791	0.110046	0.056289	TRUE	FALSE	FALSE	FALSE	398.24	445.94	5.31	6.17	0	0	1.11	24.04	17.58	0	0	22.9
14:52:18	1179.46	1092.1	98.2856	0	0	0	0	0	0	0.291392	0.228886	-0.000768605	0.00757302	0.00723393	0.00538023	-0.00144678	0.495988	0.107017	0.110317	0.0563342	TRUE	FALSE	FALSE	FALSE	398.24	445.94	5.31	6.17	0	0	1.11	24.04	17.57	0	0	22.9
14:52:19	1179.46	1092.1	98.2856	0	0	0	0	0	0	0.291279	0.228886	-0.000813817	0.00734696	0.0071209	0.00533502	-0.001492	0.496078	0.107107	0.110272	0.0563342	TRUE	FALSE	FALSE	FALSE	398.24	445.94	5.31	6.17	0	0	1.11	24.04	17.57	0	0	22.9
14:52:20	1179.46	1092.1	98.2856	0	0	0	0	0	0	0.291053	0.228886	-0.000904241	0.00723393	0.00700787	0.00538023	-0.001492	0.495626	0.107017	0.110182	0.0563342	TRUE	FALSE	FALSE	FALSE	398.24	445.94	5.31	6.17	0	0	1.11	24.04	17.57	0	0	22.9
14:52:21	1168.54	1092.1	98.2856	0	0	0	0	0	0	0.291279	0.228999	-0.000632969	0.00723393	0.00689484	0.00538023	-0.00144678	0.496033	0.107379	0.110091	0.056289	TRUE	FALSE	FALSE	FALSE	398.24	445.15	5.31	6.17	0	0	1.11	24.04	17.57	0	0	22.9
14:52:22	1179.46	1092.1	98.2856	0	0	0	0	0	0	0.291279	0.22866	-0.000859029	0.00723393	0.00689484	0.00542545	-0.00144678	0.495626	0.107379	0.110182	0.056289	TRUE	FALSE	FALSE	FALSE	398.24	445.15	5.31	6.18	0	0	1.11	24.04	17.57	0	0	22.9
14:52:23	1179.46	1081.17	98.2856	0	0	0	0	0	0	0.291505	0.228999	-0.000949453	0.00700787	0.00666878	0.00538023	-0.001492	0.495581	0.107605	0.110227	0.0563342	TRUE	FALSE	FALSE	FALSE	398.24	445.11	5.31	6.18	0	0	1.11	24.04	17.57	0	0	22.9
14:52:24	1179.46	1092.1	98.2856	0	0	0	0	0	0	0.291505	0.22866	-0.000813817	0.00689484	0.00655575	0.00538023	-0.00144678	0.495491	0.107695	0.110182	0.0563342	TRUE	FALSE	FALSE	FALSE	398.24	445.11	5.31	6.18	0	0	1.11	24.04	17.57	0	0	22.9
14:52:25	1168.54	1092.1	98.2856	0	0	0	0	0	0	0.291166	0.22866	-0.000678181	0.00678181	0.00632969	0.00542545	-0.00144678	0.495038	0.10774	0.110227	0.056289	TRUE	FALSE	FALSE	FALSE	398.24	445.03	5.31	6.18	0	0	1.11	24.04	17.57	0	0	22.9
14:52:26	1179.46	1092.1	98.2856	0	0	0	0	0	0	0.291053	0.22866	-0.000587757	0.00678181	0.00621666	0.00538023	-0.001492	0.495536	0.107966	0.110182	0.056289	TRUE	FALSE	FALSE	FALSE	398.24	445.03	5.31	6.18	0	0	1.11	24.04	17.57	0	0	22.9
14:52:27	1179.46	1092.1	98.2856	0	0	0	0	0	0	0.291166	0.228773	-0.000723393	0.00655575	0.00621666	0.00533502	-0.00140157	0.495355	0.107921	0.110272	0.0563342	TRUE	FALSE	FALSE	FALSE	398.24	444.9	5.31	6.18	0	0	1.11	23.8	17.57	0	0	22.9
14:52:28	1179.46	1092.1	98.2856	0	0	0	0	0	0	0.291392	0.228999	-0.000994665	0.00644272	0.0059906	0.00538023	-0.001492	0.494993	0.108283	0.110136	0.0562438	TRUE	FALSE	FALSE	FALSE	398.24	444.9	5.31	6.19	0	0	1.11	23.8	17.57	0	0	22.9
14:52:29	1168.54	1092.1	98.2856	0	0	0	0	0	0	0.291392	0.228886	-0.000678181	0.00644272	0.00587757	0.00533502	-0.001492	0.495038	0.108419	0.110136	0.0563342	TRUE	FALSE	FALSE	FALSE	398.24	444.9	5.31	6.19	0	0	1.11	23.71	17.57	0	0	22.8
14:52:30	1179.46	1092.1	98.2856	0	0	0	0	0	0	0.291505	0.228773	-0.000768605	0.00632969	0.00576454	0.00538023	-0.00144678	0.494858	0.108238	0.110182	0.0563342	TRUE	FALSE	FALSE	FALSE	398.24	444.9	5.31	6.19	0	0	1.11	23.71	17.57	0	0	22.9
14:52:31	1179.46	1092.1	98.2856	0	0	0	0	0	0	0.291618	0.229112	-0.000678181	0.00621666	0.00553848	0.00533502	-0.001492	0.494677	0.108509	0.110272	0.0563342	TRUE	FALSE	FALSE	FALSE	398.39	444.9	5.31	6.19	0	0	1.11	23.71	17.57	0	0	22.9
14:52:32	1168.54	1092.1	98.2856	0	0	0	0	0	0	0.291279	0.228773	-0.000678181	0.00587757	0.00553848	0.00538023	-0.00144678	0.494812	0.108554	0.110182	0.056289	TRUE	FALSE	FALSE	FALSE	398.39	444.9	5.29	6.19	0	0	1.11	23.71	17.48	0	0	22.9
14:52:33	1179.46	1092.1	98.2856	0	0	0	0	0	0	0.291505	0.22866	-0.000678181	0.00576454	0.00553848	0.00538023	-0.00144678	0.494632	0.10869	0.110136	0.056289	TRUE	FALSE	FALSE	FALSE	398.07	444.9	5.29	6.19	0	0	1.11	23.7	17.48	0	0	22.9
14:52:34	1179.46	1092.1	98.2856	0	0	0	0	0	0	0.291166	0.228773	-0.000542545	0.00587757	0.00542545	0.00533502	-0.00144678	0.49427	0.108871	0.110182	0.0563342	TRUE	FALSE	FALSE	FALSE	398.07	444.9	5.29	6.19	0	0	1.11	23.7	17.47	0	0	22.8
14:52:35	1168.54	1092.1	98.2856	0	0	0	0	0	0	0.291053	0.228434	-0.000768605	0.00587757	0.00531242	0.00533502	-0.00144678	0.49436	0.108961	0.110227	0.0563794	TRUE	FALSE	FALSE	FALSE	398.06	444.9	5.29	6.19	0	0	1.11	23.7	17.47	0	0	22.8
14:52:36	1179.46	1092.1	98.2856	0	0	0	0	0	0	0.291505	0.228886	-0.000678181	0.00565151	0.00531242	0.00538023	-0.001492	0.494179	0.109277	0.110136	0.0563794	TRUE	FALSE	FALSE	FALSE	398.06	444.9	5.29	6.19	0	0	1.11	23.7	17.46	0	0	22.8
14:52:37	1179.46	1092.1	98.2856	0	0	0	0	0	0	0.291166	0.228773	-0.000678181	0.00565151	0.00508635	0.00538023	-0.00144678	0.494225	0.109097	0.110136	0.056289	TRUE	FALSE	FALSE	FALSE	398.21	444.9	5.29	6.19	0	0	1.11	23.7	17.46	0	0	22.7
14:52:38	1179.46	1092.1	98.2856	0	0	0	0	0	0	0.291166	0.228547	-0.000859029	0.00576454	0.00497332	0.00533502	-0.00144678	0.493953	0.109368	0.110227	0.056289	TRUE	FALSE	FALSE	FALSE	398.21	444.9	5.28	6.19	0	0	1.11	23.7	17.45	0	0	22.7
14:52:39	1179.46	1092.1	98.2856	0	0	0	0	0	0	0.291166	0.228773	-0.000813817	0.00553848	0.00474726	0.00533502	-0.00140157	0.494089	0.109413	0.110227	0.0563342	TRUE	FALSE	FALSE	FALSE	398.21	444.9	5.28	6.19	0	0	1.11	23.7	17.45	0	0	22.7
14:52:40	1168.54	1092.1	98.2856	0	0	0	0	0	0	0.291166	0.228886	-0.000678181	0.00542545	0.00474726	0.00533502	-0.00144678	0.493953	0.109504	0.110182	0.0563342	TRUE	FALSE	FALSE	FALSE	398.21	444.9	5.28	6.19	0	0	1.11	23.7	17.45	0	0	22.7
14:52:41	1179.46	1081.17	98.2856	0	0	0	0	0	0	0.291166	0.22866	-0.000768605	0.00542545	0.00474726	0.00533502	-0.00144678	0.493773	0.10982	0.110227	0.056289	TRUE	FALSE	FALSE	FALSE	398.21	446.07	5.28	6.19	0	0	1.11	23.7	17.45	0	0	22.7
14:52:42	1179.46	1092.1	98.2856	0	0	0	0	0	0	0.291618	0.229112	-0.000723393	0.00542545	0.00463423	0.00533502	-0.001492	0.493727	0.109865	0.110091	0.0562438	TRUE	FALSE	FALSE	FALSE	398.21	446.07	5.28	6.19	0	0	1.11	23.7	17.45	0	0	22.7
14:52:43	1168.54	1092.1	98.2856	0	0	0	0	0	0	0.291279	0.229225	-0.000678181	0.00519938	0.00452121	0.00538023	-0.00144678	0.493546	0.110001	0.110182	0.0563342	TRUE	FALSE	FALSE	FALSE	398.21	446.05	5.28	6.19	0	0	1.11	23.7	17.45	0	0	22.7
14:52:44	1179.46	1092.1	98.2856	0	0	0	0	0	0	0.291731	0.229112	-0.000542545	0.00519938	0.00440817	0.00533502	-0.00144678	0.493682	0.110091	0.110136	0.056289	TRUE	FALSE	FALSE	FALSE	398.21	446.05	5.28	6.19	0	0	1.11	23.7	17.45	0	0	22.7
14:52:45	1179.46	1092.1	98.2856	0	0	0	0	0	0	0.291279	0.228999	-0.000632969	0.00519938	0.00440817	0.00538023	-0.001492	0.492959	0.110317	0.110182	0.056289	TRUE	FALSE	FALSE	FALSE	398.21	445.92	5.28	6.19	0	0	1.11	23.7	17.45	0	0	22.7
14:52:46	1179.46	1092.1	98.2856	0	0	0	0	0	0	0.291505	0.228886	-0.000723393	0.00508635	0.00440817	0.00533502	-0.001492	0.493501	0.110227	0.110136	0.0563342	TRUE	FALSE	FALSE	FALSE	398.21	445.92	5.28	6.19	0	0	1.11	23.7	17.45	0	0	22.7
14:52:47	1179.46	1092.1	98.2856	0	0	0	0	0	0	0.291618	0.228886	-0.000813817	0.00508635	0.00440817	0.00528981	-0.00140157	0.493094	0.110724	0.110136	0.0563342	TRUE	FALSE	FALSE	FALSE	398.21	445.86	5.28	6.19	0	0	1.11	23.53	17.45	0	0	22.7
14:52:48	1168.54	1092.1	98.2856	0	0	0	0	0	0	0.291166	0.228886	-0.000723393	0.00508635	0.00429514	0.00533502	-0.00144678	0.493004	0.110317	0.110136	0.056289	TRUE	FALSE	FALSE	FALSE	398.21	445.86	5.28	6.19	0	0	1.11	23.53	17.45	0	0	22.7
14:52:49	1179.46	1092.1	98.2856	0	0	0	0	0	0	0.291505	0.228886	-0.000859029	0.00508635	0.00429514	0.00533502	-0.00140157	0.492959	0.110724	0.110272	0.0563342	TRUE	FALSE	FALSE	FALSE	398.21	445.86	5.28	6.19	0	0	1.11	23.52	17.45	0	0	22.7
14:52:50	1179.46	1092.1	98.2856	0	0	0	0	0	0	0.29207	0.229338	-0.000497333	0.00486029	0.00429514	0.00538023	-0.00144678	0.492914	0.11077	0.110136	0.0563342	TRUE	FALSE	FALSE	FALSE	398.21	445.86	5.28	6.19	0	0	1.11	23.52	17.45	0	0	22.7
14:52:51	1179.46	1092.1	98.2856	0	0	0	0	0	0	0.291618	0.228886	-0.000723393	0.00497332	0.00406908	0.00538023	-0.00144678	0.492914	0.111176	0.110136	0.056289	TRUE	FALSE	FALSE	FALSE	399.05	445.86	5.28	6.19	0	0	1.11	23.51	17.45	0	0	22.7
14:52:52	1179.46	1092.1	98.2856	0	0	0	0	0	0	0.291279	0.22866	-0.000768605	0.00486029	0.00406908	0.00538023	-0.00144678	0.492597	0.111131	0.110136	0.0563342	TRUE	FALSE	FALSE	FALSE	399.05	445.86	5.25	6.19	0	0	1.11	23.51	17.37	0	0	22.7
14:52:53	1168.54	1092.1	98.2856	0	0	0	0	0	0	0.291166	0.22866	-0.000678181	0.00486029	0.00395605	0.00538023	-0.001492	0.492326	0.111222	0.110272	0.0563342	TRUE	FALSE	FALSE	FALSE	398.84	445.86	5.25	6.19	0	0	1.11	23.51	17.37	0	0	22.7
14:52:54	1179.46	1092.1	98.2856	0	0	0	0	0	0	0.291053	0.22866	-0.000813817	0.00486029	0.00395605	0.00538023	-0.001492	0.492507	0.111493	0.110227	0.056289	TRUE	FALSE	FALSE	FALSE	398.84	445.86	5.24	6.19	0	0	1.11	23.5	17.36	0	0	22.7
14:52:55	1179.46	1092.1	98.2856	0	0	0	0	0	0	0.291166	0.228547	-0.000859029	0.00474726	0.00395605	0.00533502	-0.00144678	0.492416	0.111629	0.110227	0.0563342	TRUE	FALSE	FALSE	FALSE	398.83	445.86	5.24	6.19	0	0	1.11	23.5	17.36	0	0	22.7
14:52:56	1168.54	1092.1	98.2856	0	0	0	0	0	0	0.291279	0.228886	-0.000859029	0.00463423	0.00384302	0.00533502	-0.00144678	0.492281	0.111945	0.110272	0.056289	TRUE	FALSE	FALSE	FALSE	398.83	445.86	5.24	6.19	0	0	1.11	23.5	17.35	0	0	22.7
14:52:57	1179.46	1092.1	98.2856	0	0	0	0	0	0	0.291053	0.228547	-0.000949453	0.00463423	0.00372999	0.00538023	-0.00144678	0.492371	0.111764	0.110182	0.0562438	TRUE	FALSE	FALSE	FALSE	398.3	445.86	5.24	6.19	0	0	1.11	23.5	17.35	0	0	22.7
14:52:58	1179.46	1092.1	98.2856	0	0	0	0	0	0	0.291618	0.228773	-0.000678181	0.00452121	0.00372999	0.00542545	-0.00140157	0.492235	0.112216	0.110136	0.056289	TRUE	FALSE	FALSE	FALSE	398.3	445.86	5.24	6.19	0	0	1.1	23.5	17.35	0	0	22.7
14:52:59	1179.46	1092.1	98.2856	0	0	0	0	0	0	0.291618	0.229112	-0.000768605	0.00452121	0.00384302	0.00538023	-0.00144678	0.492009	0.112171	0.110272	0.056289	TRUE	FALSE	FALSE	FALSE	398.3	445.86	5.24	6.19	0	0	1.1	23.5	17.33	0	0	22.7
14:53:00	1168.54	1092.1	98.2856	0	0	0	0	0	0	0.291166	0.228773	-0.000678181	0.00452121	0.00372999	0.00538023	-0.00144678	0.492054	0.112216	0.110136	0.056289	TRUE	FALSE	FALSE	FALSE	398.3	445.86	5.24	6.19	0	0	1.11	23.5	17.33	0	0	22.7
14:53:01	1179.46	1081.17	98.2856	0	0	0	0	0	0	0.290826	0.228434	-0.000859029	0.00463423	0.00372999	0.00538023	-0.00144678	0.492054	0.112488	0.110136	0.0562438	TRUE	FALSE	FALSE	FALSE	398.3	445.53	5.24	6.19	0	0	1.11	23.5	17.33	0	0	22.7
14:53:02	1179.46	1092.1	98.2856	0	0	0	0	0	0	0.291053	0.228547	-0.000859029	0.00463423	0.00361696	0.00538023	-0.001492	0.491874	0.112578	0.110091	0.056289	TRUE	FALSE	FALSE	FALSE	398.3	445.53	5.24	6.19	0	0	1.11	23.5	17.33	0	0	22.7
14:53:03	1179.46	1092.1	98.2856	0	0	0	0	0	0	0.291166	0.228773	-0.000723393	0.00452121	0.00361696	0.00538023	-0.001492	0.491602	0.112623	0.110182	0.056289	TRUE	FALSE	FALSE	FALSE	398.3	445.47	5.24	6.19	0	0	1.11	23.5	17.33	0	0	22.7
14:53:04	1168.54	1092.1	98.2856	0	0	0	0	0	0	0.291166	0.228773	-0.000723393	0.00452121	0.00372999	0.00538023	-0.00140157	0.491738	0.112533	0.110136	0.0563342	TRUE	FALSE	FALSE	FALSE	398.3	445.47	5.24	6.19	0	0	1.11	23.5	17.33	0	0	22.7
14:53:05	1179.46	1092.1	98.2856	0	0	0	0	0	0	0.290826	0.228434	-0.000678181	0.00440817	0.00350393	0.00538023	-0.001492	0.491376	0.112759	0.110136	0.0563342	TRUE	FALSE	FALSE	FALSE	398.3	445.47	5.24	6.19	0	0	1.11	23.5	17.33	0	0	22.7
14:53:06	1179.46	1092.1	98.2856	0	0	0	0	0	0	0.29094	0.228434	-0.000859029	0.00440817	0.00361696	0.00538023	-0.00144678	0.491557	0.112759	0.110182	0.056289	TRUE	FALSE	FALSE	FALSE	398.3	445.4	5.24	6.19	0	0	1.11	23.5	17.33	0	0	22.7
14:53:07	1168.54	1092.1	98.2856	0	0	0	0	0	0	0.291166	0.228434	-0.000904241	0.00440817	0.00350393	0.00542545	-0.001492	0.491557	0.112985	0.110272	0.056289	TRUE	FALSE	FALSE	FALSE	398.3	445.4	5.24	6.19	0	0	1.11	23.5	17.33	0	0	22.7
14:53:08	1179.46	1092.1	98.2856	0	0	0	0	0	0	0.291166	0.22866	-0.000723393	0.00440817	0.0033909	0.00538023	-0.00144678	0.491512	0.113075	0.110272	0.056289	TRUE	FALSE	FALSE	FALSE	398.3	445.32	5.24	6.19	0	0	1.11	23.39	17.33	0	0	22.7
14:53:09	1179.46	1092.1	98.2856	0	0	0	0	0	0	0.291844	0.228999	-0.000813817	0.00429514	0.00350393	0.00538023	-0.00144678	0.491286	0.113211	0.110227	0.0563794	TRUE	FALSE	FALSE	FALSE	398.3	445.32	5.24	6.19	0	0	1.11	23.39	17.33	0	0	22.7
14:53:10	1168.54	1092.1	98.2856	0	0	0	0	0	0	0.291279	0.22866	-0.000678181	0.00429514	0.00350393	0.00538023	-0.00144678	0.49115	0.113347	0.110182	0.0563342	TRUE	FALSE	FALSE	FALSE	398.3	445.32	5.24	6.19	0	0	1.11	23.38	17.33	0	0	22.7
14:53:11	1179.46	1092.1	98.2856	0	0	0	0	0	0	0.291279	0.228773	-0.000678181	0.00440817	0.0033909	0.00538023	-0.00144678	0.491286	0.113663	0.110317	0.0563342	TRUE	FALSE	FALSE	FALSE	398.3	445.32	5.24	6.19	0	0	1.11	23.38	17.33	0	0	22.7
14:53:12	1179.46	1092.1	98.2856	0	0	0	0	0	0	0.291618	0.229112	-0.000904241	0.00440817	0.00316484	0.00533502	-0.00144678	0.491286	0.113527	0.110227	0.0563342	TRUE	FALSE	FALSE	FALSE	398.44	445.32	5.22	6.19	0	0	1.11	23.36	17.33	0	0	22.7
14:53:13	1179.46	1092.1	98.2856	0	0	0	0	0	0	0.291279	0.228773	-0.000632969	0.00429514	0.0033909	0.00538023	-0.00144678	0.490969	0.113753	0.110227	0.056289	TRUE	FALSE	FALSE	FALSE	398.44	445.32	5.22	6.19	0	0	1.11	23.36	17.26	0	0	22.7
14:53:14	1168.54	1092.1	98.2856	0	0	0	0	0	0	0.291279	0.22866	-0.000859029	0.00429514	0.00305181	0.00533502	-0.00144678	0.491105	0.113799	0.110182	0.0563342	TRUE	FALSE	FALSE	FALSE	397.83	445.32	5.22	6.19	0	0	1.11	23.35	17.26	0	0	22.7
14:53:15	1179.46	1092.1	98.2856	0	0	0	0	0	0	0.291053	0.22866	-0.000949453	0.00429514	0.00316484	0.00538023	-0.00144678	0.490834	0.113799	0.110272	0.0563342	TRUE	FALSE	FALSE	FALSE	397.83	445.32	5.22	6.19	0	0	1.11	23.35	17.25	0	0	22.7
14:53:16	1179.46	1081.17	98.2856	0	0	0	0	0	0	0.291166	0.22866	-0.000813817	0.00418211	0.00327787	0.00538023	-0.00144678	0.490969	0.113934	0.110182	0.0563342	TRUE	FALSE	FALSE	FALSE	397.64	445.32	5.22	6.19	0	0	1.11	23.35	17.25	0	0	22.7
14:53:17	1179.46	1092.1	98.2856	0	0	0	0	0	0	0.291166	0.228434	-0.000813817	0.00429514	0.0033909	0.00538023	-0.001492	0.491015	0.11407	0.110182	0.0563342	TRUE	FALSE	FALSE	FALSE	397.64	445.32	5.22	6.19	0	0	1.11	23.35	17.24	0	0	22.7
14:53:18	1179.46	1092.1	98.2856	0	0	0	0	0	0	0.291166	0.228547	-0.000678181	0.00418211	0.0033909	0.00538023	-0.00144678	0.490472	0.114477	0.110227	0.0563342	TRUE	FALSE	FALSE	FALSE	398.21	445.32	5.22	6.19	0	0	1.1	23.35	17.24	0	0	22.7
14:53:19	1168.54	1092.1	98.2856	0	0	0	0	0	0	0.291166	0.22866	-0.000678181	0.00429514	0.00305181	0.00533502	-0.001492	0.490698	0.114296	0.110317	0.0563342	TRUE	FALSE	FALSE	FALSE	398.21	445.32	5.22	6.19	0	0	1.1	23.35	17.22	0	0	22.7
14:53:20	1179.46	1092.1	98.2856	0	0	0	0	0	0	0.291279	0.228773	-0.000859029	0.00429514	0.00316484	0.00538023	-0.001492	0.490562	0.114432	0.110182	0.056289	TRUE	FALSE	FALSE	FALSE	398.21	445.32	5.22	6.19	0	0	1.11	23.35	17.22	0	0	22.7
14:53:21	1179.46	1092.1	98.2856	0	0	0	0	0	0	0.291053	0.22866	-0.000723393	0.00429514	0.00327787	0.00533502	-0.001492	0.490608	0.114658	0.110182	0.056289	TRUE	FALSE	FALSE	FALSE	398.21	445.32	5.22	6.19	0	0	1.11	23.35	17.22	0	0	22.7
14:53:22	1168.54	1092.1	98.2856	0	0	0	0	0	0	0.291053	0.228321	-0.000678181	0.00406908	0.00327787	0.00533502	-0.001492	0.490201	0.114522	0.110227	0.056289	TRUE	FALSE	FALSE	FALSE	398.21	444.76	5.22	6.19	0	0	1.11	23.35	17.22	0	0	22.7
14:53:23	1179.46	1092.1	98.2856	0	0	0	0	0	0	0.291279	0.22866	-0.000859029	0.00418211	0.00305181	0.00538023	-0.001492	0.490336	0.114839	0.110182	0.0563342	TRUE	FALSE	FALSE	FALSE	398.21	444.76	5.22	6.18	0	0	1.11	23.35	17.22	0	0	22.7
14:53:24	1179.46	1081.17	98.2856	0	0	0	0	0	0	0.291166	0.228434	-0.000768605	0.00429514	0.00316484	0.00538023	-0.00144678	0.490201	0.114929	0.110136	0.0563342	TRUE	FALSE	FALSE	FALSE	398.21	444.66	5.22	6.18	0	0	1.11	23.35	17.22	0	0	22.7
14:53:25	1179.46	1092.1	98.2856	0	0	0	0	0	0	0.291053	0.22866	-0.000859029	0.00418211	0.00316484	0.00533502	-0.001492	0.490201	0.114929	0.110182	0.056289	TRUE	FALSE	FALSE	FALSE	398.21	444.66	5.22	6.18	0	0	1.11	23.35	17.22	0	0	22.7
14:53:26	1168.54	1092.1	98.2856	0	0	0	0	0	0	0.291166	0.228547	-0.000813817	0.00418211	0.00316484	0.00538023	-0.001492	0.49011	0.115065	0.110272	0.0563342	TRUE	FALSE	FALSE	FALSE	398.21	444.49	5.22	6.18	0	0	1.11	23.35	17.22	0	0	22.7
14:53:27	1179.46	1092.1	98.2856	0	0	0	0	0	0	0.291618	0.228999	-0.000768605	0.00406908	0.00316484	0.00533502	-0.00144678	0.49011	0.1152	0.110182	0.0562438	TRUE	FALSE	FALSE	FALSE	398.21	444.49	5.22	6.18	0	0	1.11	23.35	17.22	0	0	22.7
14:53:28	1179.46	1092.1	98.2856	0	0	0	0	0	0	0.291279	0.228999	-0.000859029	0.00418211	0.00305181	0.00538023	-0.001492	0.489884	0.115291	0.110182	0.0563342	TRUE	FALSE	FALSE	FALSE	398.21	444.43	5.22	6.18	0	0	1.11	23.23	17.22	0	0	22.7
14:53:29	1179.46	1092.1	98.2856	0	0	0	0	0	0	0.291166	0.22866	-0.000723393	0.00429514	0.00305181	0.00533502	-0.001492	0.49011	0.115426	0.110227	0.056289	TRUE	FALSE	FALSE	FALSE	398.21	444.43	5.22	6.18	0	0	1.11	23.23	17.22	0	0	22.7
14:53:30	1179.46	1092.1	98.2856	0	0	0	0	0	0	0.29094	0.228547	-0.000904241	0.00429514	0.00305181	0.00538023	-0.001492	0.49002	0.115472	0.110227	0.0563342	TRUE	FALSE	FALSE	FALSE	398.21	444.43	5.22	6.18	0	0	1.11	23.21	17.22	0	0	22.7
14:53:31	1179.46	1092.1	98.2856	0	0	0	0	0	0	0.291053	0.228434	-0.000949453	0.00429514	0.00305181	0.00538023	-0.001492	0.489703	0.115517	0.110182	0.0563342	TRUE	FALSE	FALSE	FALSE	398.21	444.43	5.22	6.18	0	0	1.11	23.21	17.22	0	0	22.7
14:53:32	1168.54	1092.1	98.2856	0	0	0	0	0	0	0.291053	0.228547	-0.000813817	0.00429514	0.00305181	0.00538023	-0.001492	0.489839	0.115969	0.110136	0.056289	TRUE	FALSE	FALSE	FALSE	396.67	444.43	5.22	6.18	0	0	1.11	23.2	17.22	0	0	22.7
14:53:33	1179.46	1092.1	98.2856	0	0	0	0	0	0	0.291053	0.228773	-0.000813817	0.00429514	0.00305181	0.00538023	-0.001492	0.489884	0.115562	0.110182	0.0563342	TRUE	FALSE	FALSE	FALSE	396.67	444.43	5.19	6.18	0	0	1.11	23.2	17.14	0	0	22.7
14:53:34	1179.46	1092.1	98.2856	0	0	0	0	0	0	0.291618	0.228773	-0.000768605	0.00429514	0.00305181	0.00538023	-0.00144678	0.489839	0.115924	0.110182	0.056289	TRUE	FALSE	FALSE	FALSE	396.25	444.43	5.19	6.18	0	0	1.11	23.18	17.14	0	0	22.7
14:53:35	1179.46	1092.1	98.2856	0	0	0	0	0	0	0.291279	0.228886	-0.000632969	0.00429514	0.00305181	0.00533502	-0.00144678	0.489613	0.116014	0.110091	0.0563342	TRUE	FALSE	FALSE	FALSE	396.25	444.43	5.19	6.18	0	0	1.11	23.18	17.13	0	0	22.7
14:53:36	1179.46	1092.1	98.2856	0	0	0	0	0	0	0.291505	0.228773	-0.00103988	0.00418211	0.00305181	0.00533502	-0.001492	0.489613	0.116285	0.110182	0.0563342	TRUE	FALSE	FALSE	FALSE	396.51	444.43	5.19	6.18	0	0	1.11	23.18	17.13	0	0	22.7
14:53:37	1179.46	1092.1	98.2856	0	0	0	0	0	0	0.291053	0.228547	-0.000949453	0.00418211	0.00293878	0.00538023	-0.001492	0.489297	0.11624	0.110272	0.056289	TRUE	FALSE	FALSE	FALSE	396.51	444.43	5.18	6.18	0	0	1.11	23.18	17.11	0	0	22.7
14:53:38	1168.54	1081.17	98.2856	0	0	0	0	0	0	0.291053	0.22866	-0.000723393	0.00429514	0.00305181	0.00538023	-0.001492	0.489432	0.116376	0.110227	0.0563342	TRUE	FALSE	FALSE	FALSE	396.59	444.43	5.18	6.18	0	0	1.11	23.18	17.11	0	0	22.7
14:53:39	1179.46	1092.1	98.2856	0	0	0	0	0	0	0.291505	0.22866	-0.000678181	0.00429514	0.00293878	0.00533502	-0.001492	0.489432	0.116421	0.110182	0.056289	TRUE	FALSE	FALSE	FALSE	396.59	444.43	5.18	6.18	0	0	1.11	23.18	17.1	0	0	22.7
14:53:40	1179.46	1092.1	98.2856	0	0	0	0	0	0	0.291505	0.228999	-0.000904241	0.00429514	0.00305181	0.00538023	-0.00144678	0.489342	0.116602	0.110227	0.0563342	TRUE	FALSE	FALSE	FALSE	396.59	444.43	5.18	6.18	0	0	1.11	23.18	17.1	0	0	22.7
14:53:41	1179.46	1092.1	98.2856	0	0	0	0	0	0	0.291392	0.228886	-0.000949453	0.00429514	0.00327787	0.00533502	-0.00144678	0.489432	0.116692	0.110182	0.0563342	TRUE	FALSE	FALSE	FALSE	396.59	444.43	5.18	6.18	0	0	1.11	23.18	17.1	0	0	22.7
14:53:42	1179.46	1092.1	98.2856	0	0	0	0	0	0	0.291166	0.228434	-0.000859029	0.00406908	0.00305181	0.00533502	-0.00153721	0.48907	0.116918	0.110091	0.056289	TRUE	FALSE	FALSE	FALSE	396.59	443.25	5.18	6.18	0	0	1.11	23.18	17.1	0	0	22.7
14:53:43	1168.54	1092.1	98.2856	0	0	0	0	0	0	0.291279	0.228547	-0.000768605	0.00429514	0.00305181	0.00533502	-0.001492	0.48898	0.116783	0.110272	0.056289	TRUE	FALSE	FALSE	FALSE	396.59	443.25	5.18	6.17	0	0	1.11	23.18	17.1	0	0	22.7
14:53:44	1179.46	1092.1	98.2856	0	0	0	0	0	0	0.291279	0.228886	-0.000678181	0.00418211	0.00316484	0.00538023	-0.00144678	0.489161	0.116964	0.110227	0.0564246	TRUE	FALSE	FALSE	FALSE	396.59	443.16	5.18	6.17	0	0	1.11	23.18	17.1	0	0	22.7
14:53:45	1179.46	1092.1	98.2856	0	0	0	0	0	0	0.291279	0.228773	-0.000768605	0.00429514	0.00305181	0.00533502	-0.00144678	0.488799	0.117054	0.110227	0.0563342	TRUE	FALSE	FALSE	FALSE	396.59	443.16	5.18	6.17	0	0	1.11	23.18	17.1	0	0	22.7
14:53:46	1179.46	1092.1	98.2856	0	0	0	0	0	0	0.291731	0.228999	-0.000632969	0.00429514	0.00293878	0.00538023	-0.00144678	0.488663	0.117099	0.110227	0.0561986	TRUE	FALSE	FALSE	FALSE	396.59	442.95	5.18	6.17	0	0	1.11	23.18	17.1	0	0	22.7
14:53:47	1179.46	1092.1	98.2856	0	0	0	0	0	0	0.291731	0.228886	-0.000813817	0.00418211	0.00305181	0.00538023	-0.001492	0.488799	0.117325	0.110136	0.056289	TRUE	FALSE	FALSE	FALSE	396.59	442.95	5.18	6.17	0	0	1.11	23.18	17.1	0	0	22.7
14:53:48	1179.46	1092.1	98.2856	0	0	0	0	0	0	0.291505	0.228886	-0.000949453	0.00429514	0.00305181	0.00533502	-0.001492	0.488709	0.117506	0.110227	0.0563342	TRUE	FALSE	FALSE	FALSE	396.59	442.86	5.18	6.17	0	0	1.11	22.97	17.1	0	0	22.7
14:53:49	1179.46	1092.1	98.2856	0	0	0	0	0	0	0.291053	0.228773	-0.000904241	0.00429514	0.00305181	0.00538023	-0.00144678	0.488663	0.117325	0.110227	0.0563342	TRUE	FALSE	FALSE	FALSE	396.59	442.86	5.18	6.17	0	0	1.11	22.97	17.1	0	0	22.7
14:53:50	1168.54	1092.1	98.2856	0	0	0	0	0	0	0.291279	0.228886	-0.000768605	0.00429514	0.00305181	0.00533502	-0.00144678	0.488573	0.117371	0.110227	0.0563342	TRUE	FALSE	FALSE	FALSE	396.59	442.86	5.18	6.17	0	0	1.11	22.96	17.1	0	0	22.7
14:53:51	1179.46	1092.1	98.2856	0	0	0	0	0	0	0.291731	0.228886	-0.000723393	0.00418211	0.0033909	0.00538023	-0.001492	0.488618	0.117777	0.110182	0.0563342	TRUE	FALSE	FALSE	FALSE	396.59	442.86	5.18	6.17	0	0	1.11	22.96	17.1	0	0	22.7
14:53:52	1179.46	1092.1	98.2856	0	0	0	0	0	0	0.291618	0.228886	-0.0011303	0.00429514	0.00305181	0.00533502	-0.001492	0.488392	0.117823	0.110136	0.056289	TRUE	FALSE	FALSE	FALSE	395.83	442.86	5.18	6.17	0	0	1.11	22.94	17.1	0	0	22.7
14:53:53	1179.46	1092.1	98.2856	0	0	0	0	0	0	0.291505	0.228886	-0.000859029	0.00429514	0.00316484	0.00533502	-0.001492	0.488392	0.117958	0.110227	0.056289	TRUE	FALSE	FALSE	FALSE	395.83	442.86	5.16	6.17	0	0	1.11	22.94	16.94	0	0	22.7
14:53:54	1179.46	1092.1	98.2856	0	0	0	0	0	0	0.291505	0.228773	-0.000768605	0.00418211	0.00316484	0.00538023	-0.001492	0.488302	0.118003	0.110227	0.0563342	TRUE	FALSE	FALSE	FALSE	395.84	442.86	5.16	6.17	0	0	1.11	22.93	16.94	0	0	22.7
14:53:55	1179.46	1092.1	98.2856	0	0	0	0	0	0	0.291279	0.228773	-0.000813817	0.00429514	0.00305181	0.00538023	-0.001492	0.488166	0.11823	0.110182	0.056289	TRUE	FALSE	FALSE	FALSE	395.84	442.86	5.16	6.17	0	0	1.11	22.93	16.93	0	0	22.7
14:53:56	1179.46	1092.1	98.2856	0	0	0	0	0	0	0.291618	0.229112	-0.000859029	0.00429514	0.00305181	0.00533502	-0.00144678	0.488211	0.118184	0.110182	0.056289	TRUE	FALSE	FALSE	FALSE	395.59	442.86	5.16	6.17	0	0	1.11	22.93	16.93	0	0	22.7
14:53:57	1179.46	1092.1	98.2856	0	0	0	0	0	0	0.291618	0.228999	-0.000813817	0.00418211	0.00327787	0.00538023	-0.00153721	0.488211	0.118365	0.110227	0.056289	TRUE	FALSE	FALSE	FALSE	395.59	442.86	5.15	6.17	0	0	1.11	22.93	16.92	0	0	22.7
14:53:58	1179.46	1092.1	98.2856	0	0	0	0	0	0	0.291166	0.22866	-0.000859029	0.00429514	0.00327787	0.00533502	-0.001492	0.487985	0.118636	0.110227	0.0563342	TRUE	FALSE	FALSE	FALSE	396.14	442.86	5.15	6.17	0	0	1.1	22.93	16.92	0	0	22.7
14:53:59	1168.54	1092.1	98.2856	0	0	0	0	0	0	0.291731	0.229112	-0.000813817	0.00418211	0.0033909	0.00538023	-0.001492	0.48794	0.118636	0.110272	0.056289	TRUE	FALSE	FALSE	FALSE	396.14	442.86	5.15	6.17	0	0	1.1	22.93	16.9	0	0	22.7
14:54:00	1179.46	1092.1	98.2856	0	0	0	0	0	0	0.291618	0.228999	-0.000678181	0.00418211	0.00305181	0.00533502	-0.001492	0.488257	0.118682	0.110227	0.0562438	TRUE	FALSE	FALSE	FALSE	396.14	442.86	5.15	6.17	0	0	1.11	22.93	16.9	0	0	22.7
14:54:01	1179.46	1092.1	98.2856	0	0	0	0	0	0	0.291731	0.228886	-0.000813817	0.00429514	0.00316484	0.00533502	-0.001492	0.487714	0.118817	0.110227	0.056289	TRUE	FALSE	FALSE	FALSE	396.14	442.86	5.15	6.17	0	0	1.11	22.93	16.9	0	0	22.7
14:54:02	1179.46	1092.1	98.2856	0	0	0	0	0	0	0.291392	0.228773	-0.000768605	0.00429514	0.00327787	0.00533502	-0.00153721	0.487895	0.118862	0.110227	0.056289	TRUE	FALSE	FALSE	FALSE	396.14	441.51	5.15	6.17	0	0	1.11	22.93	16.9	0	0	22.7
14:54:03	1179.46	1092.1	98.2856	0	0	0	0	0	0	0.291618	0.228999	-0.000632969	0.00418211	0.00305181	0.00528981	-0.00144678	0.487804	0.118862	0.110227	0.0563342	TRUE	FALSE	FALSE	FALSE	396.14	441.51	5.15	6.17	0	0	1.11	22.93	16.9	0	0	22.7
14:54:04	1179.46	1092.1	98.2856	0	0	0	0	0	0	0.291618	0.228999	-0.000859029	0.00429514	0.00305181	0.00533502	-0.001492	0.48785	0.119088	0.110136	0.056289	TRUE	FALSE	FALSE	FALSE	396.14	441.39	5.15	6.17	0	0	1.11	22.93	16.9	0	0	22.7
14:54:05	1179.46	1092.1	98.2856	0	0	0	0	0	0	0.291505	0.228999	-0.000723393	0.00418211	0.00305181	0.00538023	-0.001492	0.487714	0.119134	0.110182	0.056289	TRUE	FALSE	FALSE	FALSE	396.14	441.39	5.15	6.17	0	0	1.11	22.93	16.9	0	0	22.7
14:54:06	1179.46	1092.1	98.2856	0	0	0	0	0	0	0.291392	0.228886	-0.000723393	0.00429514	0.00305181	0.00533502	-0.00144678	0.487578	0.119179	0.110227	0.0562438	TRUE	FALSE	FALSE	FALSE	396.14	441.21	5.15	6.17	0	0	1.11	22.93	16.9	0	0	22.7
14:54:07	1179.46	1092.1	98.2856	0	0	0	0	0	0	0.291392	0.228886	-0.000949453	0.00429514	0.00305181	0.00538023	-0.001492	0.487307	0.119541	0.110182	0.056289	TRUE	FALSE	FALSE	FALSE	396.14	441.21	5.15	6.17	0	0	1.11	22.93	16.9	0	0	22.7
14:54:08	1168.54	1081.17	98.2856	0	0	0	0	0	0	0.291279	0.228773	-0.000723393	0.00429514	0.00293878	0.00533502	-0.001492	0.487352	0.11945	0.110227	0.056289	TRUE	FALSE	FALSE	FALSE	396.14	441.04	5.15	6.17	0	0	1.11	22.65	16.9	0	0	22.7
14:54:09	1179.46	1103.02	98.2856	0	0	0	0	0	0	0.291279	0.228886	-0.000904241	0.00429514	0.00327787	0.00533502	-0.00153721	0.487352	0.119586	0.110272	0.056289	TRUE	FALSE	FALSE	FALSE	396.14	441.04	5.15	6.17	0	0	1.11	22.65	16.9	0	0	22.7
14:54:10	1179.46	1092.1	98.2856	0	0	0	0	0	0	0.291392	0.228773	-0.000949453	0.00406908	0.00293878	0.00538023	-0.001492	0.487578	0.119495	0.110227	0.0563342	TRUE	FALSE	FALSE	FALSE	396.14	441.04	5.15	6.17	0	0	1.11	22.64	16.9	0	0	22.7
14:54:11	1179.46	1092.1	98.2856	0	0	0	0	0	0	0.291392	0.228886	-0.000859029	0.00429514	0.00305181	0.00533502	-0.001492	0.487262	0.119812	0.110182	0.0562438	TRUE	FALSE	FALSE	FALSE	396.14	441.04	5.15	6.17	0	0	1.11	22.64	16.9	0	0	22.7
14:54:12	1168.54	1081.17	98.2856	0	0	0	0	0	0	0.291392	0.228886	-0.000859029	0.00429514	0.00305181	0.00538023	-0.00158242	0.487262	0.119902	0.110091	0.056289	TRUE	FALSE	FALSE	FALSE	394.92	441.04	5.15	6.17	0	0	1.11	22.62	16.9	0	0	22.7
14:54:13	1179.46	1103.02	98.2856	0	0	0	0	0	0	0.291279	0.228886	-0.000859029	0.00418211	0.00361696	0.00533502	-0.001492	0.487624	0.119315	0.110996	0.056289	TRUE	TRUE	FALSE	FALSE	394.92	441.04	5.14	6.17	0	0	1.11	22.62	16.83	0	0	22.7
14:54:14	1179.46	1081.17	98.2856	305.782	10.9203	87.3648	0	0	0	0.291166	0.22866	-0.000678181	0.0837553	0.0454381	0.00533502	-0.001492	0.487217	0.119495	0.110363	0.056289	TRUE	TRUE	FALSE	FALSE	395.23	441.04	5.14	6.17	0	0	1.11	22.61	16.83	0	0	22.7
14:54:15	1179.46	1092.1	98.2856	666.174	174.731	174.731	0	0	0	0.291166	0.22866	-0.000723393	0.163102	0.128063	0.00542545	-0.001492	0.486945	0.118998	0.110227	0.0563342	TRUE	TRUE	FALSE	FALSE	395.23	441.04	5.15	6.17	0	0	1.11	22.61	16.82	0	0	22.7
14:54:16	1179.46	1092.1	98.2856	655.253	327.623	98.2856	0	0	0	0.291505	0.228999	-0.000859029	0.240302	0.202776	0.00538023	-0.001492	0.486719	0.118501	0.110136	0.0563342	TRUE	TRUE	FALSE	FALSE	394.92	441.04	5.15	6.17	0	0	1.11	22.61	16.82	0	0	22.7
14:54:17	1179.46	1092.1	98.2856	611.568	425.912	98.2856	0	0	0	0.291505	0.228999	-0.000587757	0.276019	0.242563	0.00538023	-0.001492	0.486539	0.11841	0.110182	0.056289	TRUE	TRUE	FALSE	FALSE	394.92	441.04	5.15	6.17	0	0	1.11	22.61	16.81	0	0	22.7
14:54:18	1168.54	1092.1	98.2856	600.648	480.517	98.2856	0	0	0	0.291279	0.228547	-0.000859029	0.287888	0.254318	0.00542545	-0.001492	0.486991	0.117868	0.110182	0.0563342	TRUE	TRUE	FALSE	FALSE	395.48	441.04	5.15	6.17	0	0	1.1	22.61	16.81	0	0	22.7
14:54:19	1179.46	1092.1	98.2856	600.648	491.438	87.3648	0	0	0	0.291166	0.228547	-0.000768605	0.291053	0.25737	0.00542545	-0.00144678	0.486584	0.117687	0.110272	0.056289	TRUE	TRUE	FALSE	FALSE	395.48	441.04	5.15	6.17	0	3.06	1.1	22.61	16.79	0	0	22.7
14:54:20	1179.46	1092.1	98.2856	589.727	502.359	87.3648	0	0	0	0.291279	0.22866	-0.000904241	0.291618	0.258161	0.00542545	-0.001492	0.486584	0.116964	0.110408	0.056289	TRUE	TRUE	FALSE	FALSE	395.48	441.04	5.15	6.17	0	3.06	1.11	22.61	16.79	0	0	22.7
14:54:21	1179.46	1092.1	98.2856	589.727	502.359	98.2856	0	0	0	0.291618	0.228773	-0.000904241	0.291731	0.258161	0.00542545	-0.00144678	0.486267	0.116692	0.110363	0.0563342	TRUE	TRUE	FALSE	FALSE	395.48	441.04	5.15	6.17	0	3.06	1.11	22.61	16.79	0	0	22.7
14:54:22	1179.46	1092.1	98.2856	600.648	502.359	87.3648	0	0	0	0.29094	0.228773	-0.000813817	0.291731	0.258274	0.00538023	-0.001492	0.486539	0.116331	0.110453	0.0563342	TRUE	TRUE	FALSE	FALSE	395.48	439.5	5.15	6.17	0	3.06	1.11	22.61	16.79	0	0	22.7
14:54:23	1179.46	1092.1	98.2856	589.727	502.359	87.3648	0	0	0	0.291279	0.228886	-0.000723393	0.291731	0.258161	0.00542545	-0.00140157	0.486267	0.115517	0.110544	0.0563342	TRUE	TRUE	FALSE	FALSE	395.48	439.5	5.15	6.04	7.03	3.06	1.11	22.61	16.79	0	0	22.7
14:54:24	1168.54	1092.1	98.2856	589.727	502.359	87.3648	0	0	0	0.291166	0.228547	-0.000678181	0.291618	0.258048	0.00542545	-0.001492	0.486267	0.115652	0.110363	0.056289	TRUE	TRUE	FALSE	FALSE	395.48	440.32	5.15	6.04	7.03	3.06	1.1	22.61	16.79	0	0	22.7
14:54:25	1179.46	1081.17	98.2856	600.648	502.359	98.2856	0	0	0	0.291166	0.22866	-0.000904241	0.291505	0.258048	0.00538023	-0.00144678	0.486629	0.114884	0.110815	0.0563342	TRUE	TRUE	FALSE	FALSE	395.48	440.32	5.15	6.04	7.01	3.06	1.1	22.61	16.79	0	0	22.6
14:54:26	1179.46	1092.1	98.2856	589.727	502.359	87.3648	0	0	0	0.29094	0.228547	-0.000859029	0.291618	0.258048	0.00538023	-0.001492	0.486674	0.114658	0.11086	0.056289	TRUE	TRUE	FALSE	FALSE	395.48	440.19	5.15	6.04	7.01	3.06	1.1	22.61	16.79	0	0	22.7
14:54:27	1179.46	1092.1	98.2856	589.727	502.359	87.3648	0	0	0	0.291053	0.228547	-0.000723393	0.291731	0.258048	0.00538023	-0.00144678	0.486539	0.114341	0.110905	0.0563342	TRUE	TRUE	FALSE	FALSE	395.48	440.19	5.15	6.04	6.87	3.06	1.1	22.61	16.79	0	0	22.6
14:54:28	1179.46	1092.1	98.2856	600.648	502.359	87.3648	0	0	0	0.29094	0.228434	-0.000904241	0.291618	0.257935	0.00542545	-0.001492	0.487171	0.113844	0.111041	0.056289	TRUE	TRUE	FALSE	FALSE	395.48	440.9	5.15	6.04	6.87	3.06	1.1	22.42	16.79	0	0	22.5
14:54:29	1168.54	1092.1	98.2856	589.727	502.359	98.2856	0	0	0	0.29094	0.228547	-0.000813817	0.291166	0.257483	0.00538023	-0.00144678	0.487126	0.113527	0.111312	0.056289	TRUE	TRUE	FALSE	FALSE	395.48	440.9	5.15	6.03	6.87	3.06	1.1	22.42	16.79	0	0	22.5
14:54:30	1179.46	1092.1	98.2856	589.727	502.359	87.3648	0	0	0	0.291053	0.228547	-0.000768605	0.29094	0.25737	0.00538023	-0.00144678	0.487036	0.113166	0.111222	0.0563342	TRUE	TRUE	FALSE	FALSE	395.48	440.9	5.15	6.03	6.87	3.06	1.1	22.4	16.79	0	0	22.6
14:54:31	1179.46	1092.1	98.2856	589.727	502.359	87.3648	0	0	0	0.290826	0.228547	-0.000813817	0.291053	0.257483	0.00542545	-0.001492	0.487443	0.112714	0.111312	0.0562438	TRUE	TRUE	FALSE	FALSE	395.48	440.9	5.15	6.03	6.87	3.06	1.1	22.4	16.79	0	0	22.5
14:54:32	1179.46	1092.1	98.2856	600.648	502.359	87.3648	0	0	0	0.291166	0.228773	-0.000859029	0.291166	0.257483	0.00547066	-0.001492	0.487352	0.112171	0.111493	0.056289	TRUE	TRUE	FALSE	FALSE	395.81	440.9	5.15	6.03	6.87	3.06	1.1	22.4	16.79	0	0	22.5
14:54:33	1179.46	1092.1	98.2856	589.727	502.359	98.2856	0	0	0	0.290826	0.228321	-0.000813817	0.290826	0.25737	0.00538023	-0.00158242	0.48785	0.111855	0.111583	0.056289	TRUE	TRUE	FALSE	FALSE	395.81	440.9	5.13	6.03	6.87	3.05	1.1	22.32	16.79	0	0	22.7
14:54:34	1168.54	1092.1	98.2856	589.727	502.359	87.3648	0	0	0	0.29094	0.228547	-0.000768605	0.29094	0.25737	0.00542545	-0.001492	0.487488	0.111222	0.111583	0.056289	TRUE	TRUE	FALSE	FALSE	395.81	440.9	5.13	6.03	6.87	3.05	1.1	22.32	16.72	0	0	22.7
14:54:35	1179.46	1081.17	98.2856	600.648	502.359	87.3648	0	0	0	0.291053	0.22866	-0.000723393	0.290826	0.257483	0.00542545	-0.001492	0.487985	0.11077	0.111764	0.056289	TRUE	TRUE	FALSE	FALSE	395.1	440.9	5.13	6.03	6.87	3.03	1.1	22.38	16.72	0	0	22.7
14:54:36	1179.46	1092.1	98.2856	589.727	502.359	87.3648	0	0	0	0.29094	0.228547	-0.000768605	0.290826	0.257144	0.00547066	-0.001492	0.488031	0.110182	0.111719	0.0563342	TRUE	TRUE	FALSE	FALSE	393.45	440.9	5.13	6.03	6.87	3.03	1.1	22.38	16.71	0	0	22.6
14:54:37	1179.46	1092.1	98.2856	589.727	502.359	87.3648	0	0	0	0.290826	0.22866	-0.000768605	0.2906	0.257144	0.00542545	-0.00144678	0.488166	0.109956	0.111945	0.0562438	TRUE	TRUE	FALSE	FALSE	393.45	440.9	5.12	6.03	6.87	3.01	1.1	22.38	16.69	0	0	22.6
14:54:38	1168.54	1092.1	98.2856	589.727	502.359	98.2856	0	0	0	0.290826	0.22866	-0.000768605	0.290261	0.25703	0.00542545	-0.001492	0.487985	0.109413	0.112035	0.056289	TRUE	TRUE	FALSE	FALSE	393.88	440.9	5.12	6.03	6.87	3.01	1.1	22.38	16.69	0	0	22.5
14:54:39	1179.46	1092.1	98.2856	600.648	502.359	87.3648	0	0	0	0.29094	0.228547	-0.000813817	0.290487	0.256917	0.00542545	-0.001492	0.488663	0.109006	0.112307	0.0563794	TRUE	TRUE	FALSE	FALSE	393.88	440.9	5.12	6.03	6.87	2.98	1.1	22.38	16.68	0	0	22.5
14:54:40	1179.46	1092.1	98.2856	589.727	502.359	87.3648	0	0	0	0.291505	0.228999	-0.000813817	0.289922	0.256126	0.00542545	-0.00144678	0.488844	0.108599	0.112171	0.056289	TRUE	TRUE	FALSE	FALSE	393.88	440.9	5.12	6.03	6.87	2.98	1.1	22.38	16.68	0	0	22.5
14:54:41	1179.46	1092.1	98.2856	589.727	502.359	87.3648	0	0	0	0.291166	0.22866	-0.000723393	0.289696	0.256013	0.00542545	-0.00144678	0.488799	0.108238	0.112578	0.0563794	TRUE	TRUE	FALSE	FALSE	393.88	440.9	5.12	6.03	6.87	2.98	1.1	22.38	16.68	0	0	22.5
14:54:42	1179.46	1092.1	98.2856	589.727	502.359	87.3648	0	0	0	0.291166	0.22866	-0.000949453	0.289583	0.2559	0.00542545	-0.00144678	0.488935	0.107921	0.112397	0.056289	TRUE	TRUE	FALSE	FALSE	393.88	439.51	5.12	6.03	6.87	2.98	1.1	22.38	16.68	0	0	22.5
14:54:43	1168.54	1092.1	98.2856	600.648	502.359	87.3648	0	0	0	0.29094	0.228547	-0.000813817	0.28947	0.2559	0.00538023	-0.001492	0.48889	0.107333	0.112578	0.056289	TRUE	TRUE	FALSE	FALSE	393.88	439.51	5.12	6.03	6.95	2.98	1.1	22.38	16.68	0	0	22.5
14:54:44	1179.46	1092.1	98.2856	589.727	513.28	87.3648	0	0	0	0.291053	0.228547	-0.000768605	0.289357	0.255787	0.00542545	-0.00144678	0.489116	0.107017	0.112714	0.0563342	TRUE	TRUE	FALSE	FALSE	393.88	439.37	5.12	6.03	6.95	2.98	1.1	22.38	16.68	0	0	22.5
14:54:45	1179.46	1092.1	98.2856	589.727	502.359	98.2856	0	0	0	0.29094	0.22866	-0.000859029	0.289583	0.255674	0.00542545	-0.00144678	0.489477	0.1067	0.112714	0.0563342	TRUE	TRUE	FALSE	FALSE	393.88	439.37	5.12	6.02	6.93	2.98	1.1	22.38	16.68	0	0	22.5
14:54:46	1179.46	1092.1	98.2856	589.727	502.359	87.3648	0	0	0	0.29094	0.228547	-0.000859029	0.289357	0.255448	0.00542545	-0.001492	0.489432	0.106293	0.112894	0.056289	TRUE	TRUE	FALSE	FALSE	393.88	439.22	5.12	6.02	6.93	2.98	1.1	22.38	16.68	0	0	22.5
14:54:47	1168.54	1092.1	98.2856	600.648	502.359	87.3648	0	0	0	0.29094	0.228434	-0.000723393	0.289357	0.255674	0.00542545	-0.001492	0.489342	0.105661	0.112985	0.056289	TRUE	TRUE	FALSE	FALSE	393.88	439.22	5.12	6.02	6.94	2.98	1.1	22.38	16.68	0	0	22.5
14:54:48	1179.46	1081.17	98.2856	589.727	502.359	87.3648	0	0	0	0.291053	0.228773	-0.000768605	0.289357	0.255561	0.00542545	-0.001492	0.489613	0.105344	0.113301	0.0563342	TRUE	TRUE	FALSE	FALSE	393.88	439.09	5.12	6.02	6.94	2.98	1.1	22.38	16.68	0	0	22.5
14:54:49	1179.46	1092.1	98.2856	589.727	502.359	87.3648	0	0	0	0.29094	0.228208	-0.000768605	0.289244	0.255561	0.00547066	-0.001492	0.489975	0.104847	0.113075	0.056289	TRUE	TRUE	FALSE	FALSE	393.88	439.09	5.12	6.02	6.96	2.98	1.1	22.2	16.68	0	0	22.5
14:54:50	1179.46	1092.1	98.2856	589.727	513.28	87.3648	0	0	0	0.29094	0.228434	-0.000904241	0.289018	0.255674	0.00542545	-0.001492	0.490156	0.104802	0.113301	0.0562438	TRUE	TRUE	FALSE	FALSE	393.88	439.09	5.12	6.02	6.96	2.98	1.1	22.2	16.68	0	0	22.5
14:54:51	1168.54	1092.1	98.2856	600.648	502.359	98.2856	0	0	0	0.290826	0.22866	-0.000949453	0.289131	0.255335	0.00542545	-0.001492	0.490156	0.10444	0.113347	0.0563342	TRUE	TRUE	FALSE	FALSE	393.88	439.09	5.12	6.02	6.96	2.98	1.1	22.19	16.68	0	0	22.5
14:54:52	1179.46	1092.1	98.2856	589.727	502.359	87.3648	0	0	0	0.291166	0.228886	-0.000678181	0.289244	0.255335	0.00542545	-0.001492	0.490336	0.103942	0.113347	0.0563342	TRUE	TRUE	FALSE	FALSE	393.88	439.09	5.12	6.02	6.96	2.98	1.1	22.19	16.68	0	0	22.5
14:54:53	1179.46	1092.1	98.2856	589.727	502.359	87.3648	0	0	0	0.29094	0.22866	-0.000587757	0.288792	0.255222	0.00542545	-0.001492	0.489975	0.103355	0.113663	0.056289	TRUE	TRUE	FALSE	FALSE	391.12	439.09	5.1	6.02	6.96	2.95	1.1	22.17	16.68	0	0	22.5
14:54:54	1179.46	1092.1	98.2856	589.727	502.359	87.3648	0	0	0	0.29094	0.228434	-0.000768605	0.288792	0.255109	0.00542545	-0.001492	0.490653	0.102993	0.113708	0.0563342	TRUE	TRUE	FALSE	FALSE	391.12	439.09	5.1	6.02	6.96	2.95	1.1	22.17	16.61	0	0	22.5
14:54:55	1179.46	1092.1	98.2856	600.648	513.28	87.3648	0	0	0	0.291053	0.228547	-0.000768605	0.289018	0.255109	0.00547066	-0.001492	0.490653	0.102903	0.113844	0.0562438	TRUE	TRUE	FALSE	FALSE	391.24	439.09	5.1	6.02	6.96	2.97	1.1	22.16	16.61	0	0	22.5
14:54:56	1168.54	1092.1	98.2856	589.727	502.359	87.3648	0	0	0	0.290826	0.228321	-0.000723393	0.288905	0.255109	0.00551587	-0.001492	0.490969	0.102089	0.113934	0.056289	TRUE	TRUE	FALSE	FALSE	391.24	439.09	5.1	6.02	6.96	2.97	1.1	22.16	16.6	0	0	22.5
14:54:57	1179.46	1092.1	98.2856	589.727	502.359	87.3648	0	0	0	0.291053	0.228773	-0.000904241	0.288905	0.255222	0.00542545	-0.001492	0.490969	0.102044	0.114206	0.056289	TRUE	TRUE	FALSE	FALSE	391.16	439.09	5.09	6.02	6.96	2.99	1.1	22.16	16.6	0	0	22.5
14:54:58	1179.46	1081.17	98.2856	600.648	502.359	87.3648	0	0	0	0.29094	0.228547	-0.000723393	0.288905	0.255222	0.00547066	-0.001492	0.491105	0.101456	0.11407	0.056289	TRUE	TRUE	FALSE	FALSE	391.16	439.09	5.09	6.02	6.96	2.99	1.1	22.16	16.58	0	0	22.5
14:54:59	1179.46	1092.1	98.2856	589.727	502.359	87.3648	0	0	0	0.291053	0.228773	-0.000994665	0.288905	0.255222	0.00542545	-0.001492	0.491331	0.101094	0.114477	0.0563342	TRUE	TRUE	FALSE	FALSE	391.16	439.09	5.09	6.02	6.96	3.02	1.1	22.16	16.58	0	0	22.5
14:55:00	1168.54	1092.1	98.2856	600.648	513.28	98.2856	0	0	0	0.291166	0.228886	-0.000723393	0.288905	0.255109	0.00542545	-0.001492	0.491557	0.100778	0.114341	0.0563342	TRUE	TRUE	FALSE	FALSE	391.16	439.09	5.09	6.02	6.96	3.02	1.1	22.16	16.57	0	0	22.5
14:55:01	1179.46	1092.1	98.2856	589.727	502.359	87.3648	0	0	0	0.291279	0.228886	-0.000542545	0.289018	0.255109	0.00533502	-0.001492	0.49115	0.100054	0.114432	0.056289	TRUE	TRUE	FALSE	FALSE	391.16	439.09	5.09	6.02	6.96	3.02	1.1	22.16	16.57	0	0	22.5
14:55:02	1179.46	1092.1	98.2856	589.727	502.359	87.3648	0	0	0	0.291618	0.229225	-0.000768605	0.289018	0.255222	0.00542545	-0.001492	0.491919	0.100054	0.114522	0.0563342	TRUE	FALSE	FALSE	FALSE	391.16	437.75	5.09	6.02	6.96	3.02	1.1	22.16	16.57	0	0	22.5
14:55:03	1179.46	1092.1	98.2856	567.885	502.359	87.3648	0	10.9415	0	0.291166	0.22866	-0.000768605	0.10444	0.128402	0.00542545	-0.001492	0.492145	0.0998734	0.114974	0.0562438	TRUE	FALSE	FALSE	FALSE	391.16	437.75	5.09	6.02	7.03	3.02	1.1	22.16	16.57	0	0.15	22.5
14:55:04	1179.46	1092.1	98.2856	65.5234	371.307	0	0	0	0	0.291618	0.228886	-0.000678181	0.037526	0.0437427	0.00542545	-0.00153721	0.492009	0.100009	0.114839	0.0563342	TRUE	FALSE	FALSE	FALSE	391.16	437.67	5.09	6.01	7.03	3.02	1.1	22.16	16.57	0	0.15	22.5
14:55:05	1179.46	1092.1	98.2856	0	207.494	0	0	0	0	0.291618	0.229112	-0.000723393	0.0204584	0.0196672	0.00533502	-0.00153721	0.491919	0.100099	0.114884	0.0563342	TRUE	FALSE	FALSE	FALSE	391.16	437.67	5.09	6.01	7.03	3.02	1.1	22.16	16.57	0	0.16	22.5
14:55:06	1168.54	1092.1	98.2856	0	120.127	0	0	0	0	0.291053	0.22866	-0.000813817	0.0108509	0.00972059	0.00533502	-0.00144678	0.491964	0.100145	0.114929	0.0563342	TRUE	FALSE	FALSE	FALSE	391.16	437.49	5.09	6.01	7.03	3.02	1.1	22.16	16.57	0	0.16	22.5
14:55:07	1179.46	1092.1	98.2856	0	76.4441	0	0	0	0	0.291279	0.228773	-0.000678181	0.00576454	0.00440817	0.00538023	-0.001492	0.4921	0.100552	0.114929	0.056289	TRUE	FALSE	FALSE	FALSE	391.16	437.49	5.09	6.01	7.03	3.02	1.1	22.16	16.57	0	0.15	22.5
14:55:08	1179.46	1092.1	98.2856	0	21.8408	0	0	0	0	0.291279	0.228999	-0.000813817	0.00361696	0.00192151	0.00533502	-0.00153721	0.492145	0.100552	0.114974	0.0563342	TRUE	FALSE	FALSE	FALSE	391.16	437.49	5.09	6.02	7.03	3.02	1.1	22.16	16.57	0	0.15	22.5
14:55:09	1179.46	1103.02	98.2856	0	10.9203	0	0	0	0	0.291505	0.228886	-0.000813817	0.00271272	0.0011303	0.00538023	-0.00153721	0.492371	0.100687	0.114929	0.056289	TRUE	FALSE	FALSE	FALSE	391.16	437.31	5.09	6.02	7.02	3.02	1.1	22.07	16.57	0	0.15	22.5
14:55:10	1179.46	1092.1	98.2856	0	0	0	0	0	0	0.291166	0.228773	-0.000723393	0.00248666	0.00022606	0.00533502	-0.00144678	0.491874	0.100778	0.115019	0.0562438	TRUE	FALSE	FALSE	FALSE	391.16	437.31	5.09	6.02	7.02	3.02	1.1	22.07	16.57	0	0.15	22.5
14:55:11	1168.54	1081.17	98.2856	0	0	0	0	0	0	0.292183	0.229564	-0.000859029	0.0022606	0.00022606	0.00538023	-0.00144678	0.4921	0.100913	0.115019	0.0563342	TRUE	FALSE	FALSE	FALSE	391.16	437.31	5.09	6.02	7.02	3.02	1.1	22.06	16.57	0	0.15	22.5
14:55:12	1179.46	1092.1	98.2856	0	0	0	0	0	0	0.291392	0.228886	-0.000859029	0.00214757	0.00011303	0.00538023	-0.001492	0.492235	0.100913	0.115019	0.056289	TRUE	FALSE	FALSE	FALSE	391.16	437.31	5.09	6.02	7.02	3.02	1.1	22.06	16.57	0	0.15	22.5
14:55:13	1179.46	1092.1	98.2856	0	0	0	0	0	0	0.291279	0.228886	-0.000904241	0.00214757	0.00011303	0.00538023	-0.001492	0.4921	0.10123	0.114929	0.0563342	TRUE	FALSE	FALSE	FALSE	390.22	437.31	5.09	6.02	7.02	0	1.1	22.05	16.57	0	0.15	22.5
14:55:14	1179.46	1092.1	98.2856	0	0	0	0	0	0	0.291505	0.22866	-0.000768605	0.00214757	0.00011303	0.00542545	-0.001492	0.492235	0.101094	0.115019	0.056289	TRUE	FALSE	FALSE	FALSE	390.22	437.31	5.08	6.02	7.02	0	1.1	22.05	16.5	0	0.15	22.5
14:55:15	1179.46	1092.1	98.2856	0	0	0	0	0	0	0.291618	0.228886	-0.000994665	0.00214757	0.00011303	0.00538023	-0.001492	0.491693	0.101139	0.115019	0.056289	TRUE	FALSE	FALSE	FALSE	389.57	437.31	5.08	6.02	7.02	0	1.1	22.04	16.5	0	0.15	22.5
14:55:16	1179.46	1092.1	98.2856	0	0	0	0	0	0	0.291392	0.228999	-0.000678181	0.00203454	0.00011303	0.00538023	-0.00153721	0.491828	0.101139	0.114929	0.056289	TRUE	FALSE	FALSE	FALSE	389.57	437.31	5.08	6.02	7.02	0	1.1	22.04	16.49	0	0.15	22.5
14:55:17	1179.46	1092.1	98.2856	0	0	0	0	0	0	0.291505	0.228886	-0.000723393	0.00214757	0.00011303	0.00538023	-0.001492	0.49219	0.10123	0.115019	0.056289	TRUE	FALSE	FALSE	FALSE	388.68	437.31	5.08	6.02	7.02	0	1.1	22.04	16.49	0	0.15	22.5
14:55:18	1179.46	1092.1	98.2856	0	0	0	0	0	0	0.291618	0.228999	-0.000723393	0.00214757	0.00011303	0.00538023	-0.001492	0.491874	0.101365	0.115019	0.056289	TRUE	FALSE	FALSE	FALSE	388.68	437.31	5.08	6.02	7.02	0	1.1	22.04	16.47	0	0.15	22.5
14:55:19	1168.54	1092.1	98.2856	0	0	0	0	0	0	0.291392	0.228886	-0.000587757	0.00214757	0.00011303	0.00538023	-0.00144678	0.491828	0.101501	0.115065	0.056289	TRUE	FALSE	FALSE	FALSE	388.63	437.31	5.08	6.02	7.02	0	1.1	22.04	16.47	0	0.15	22.5
14:55:20	1179.46	1092.1	98.2856	0	0	0	0	0	0	0.291392	0.229225	-0.000678181	0.00214757	0.00011303	0.00542545	-0.00144678	0.491828	0.101727	0.115065	0.0563342	TRUE	FALSE	FALSE	FALSE	388.63	437.31	5.08	6.02	7.02	0	1.1	22.04	16.46	0	0.15	22.5
14:55:21	1179.46	1092.1	98.2856	0	0	0	0	0	0	0.291731	0.228886	-0.000768605	0.00203454	0.00011303	0.00542545	-0.00144678	0.491964	0.101818	0.115019	0.0563342	TRUE	FALSE	FALSE	FALSE	388.63	437.31	5.08	6.02	7.02	0	1.1	22.04	16.46	0	0.15	22.5
14:55:22	1179.46	1092.1	98.2856	0	0	0	0	0	0	0.291392	0.228999	-0.000768605	0.00214757	0.00011303	0.00538023	-0.001492	0.491648	0.101863	0.114974	0.0563342	TRUE	FALSE	FALSE	FALSE	388.63	437.31	5.08	6.02	7.02	0	1.1	22.04	16.46	0	0.15	22.5
14:55:23	1179.46	1092.1	98.2856	0	0	0	0	0	0	0.291731	0.228999	-0.000587757	0.00214757	0.00011303	0.00542545	-0.00144678	0.491919	0.101592	0.115019	0.056289	TRUE	FALSE	FALSE	FALSE	388.63	436.13	5.08	6.02	7.02	0	1.1	22.04	16.46	0	0.15	22.5
14:55:24	1168.54	1092.1	98.2856	0	0	0	0	0	0	0.291505	0.228886	-0.000904241	0.00214757	0.00022606	0.00538023	-0.00153721	0.492009	0.101908	0.115019	0.056289	TRUE	FALSE	FALSE	FALSE	388.63	436.13	5.08	6.02	7.02	0	1.1	22.04	16.46	0	0.15	22.5
14:55:25	1168.54	1092.1	98.2856	0	0	0	0	0	0	0.291279	0.228773	-0.000632969	0.00214757	0.00022606	0.00538023	-0.001492	0.491467	0.101953	0.115019	0.056289	TRUE	FALSE	FALSE	FALSE	388.63	436.01	5.08	6.02	7.02	0	1.1	22.04	16.46	0	0.15	22.5
14:55:26	1179.46	1092.1	98.2856	0	0	0	0	0	0	0.291505	0.228999	-0.000678181	0.00237363	0.00045212	0.00533502	-0.00144678	0.491828	0.102179	0.114929	0.0563342	TRUE	FALSE	FALSE	FALSE	388.63	436.01	5.08	6.02	7.02	0	1.1	22.04	16.46	0	0.15	22.5
14:55:27	1179.46	1092.1	98.2856	0	0	0	0	0	0	0.291618	0.228999	-0.000768605	0.00271272	0.00124333	0.00538023	-0.001492	0.491919	0.102405	0.115155	0.0563342	TRUE	FALSE	FALSE	FALSE	388.63	435.79	5.08	6.02	7.02	0	1.1	22.04	16.46	0	0.15	22.5
14:55:28	1179.46	1092.1	98.2856	0	0	0	0	0	0	0.291844	0.229112	-0.000678181	0.00384302	0.0022606	0.00538023	-0.001492	0.491964	0.102179	0.115065	0.0563342	TRUE	FALSE	FALSE	FALSE	388.63	435.79	5.08	6.02	7.02	0	1.1	22.04	16.46	0	0.15	22.5
14:55:29	1179.46	1092.1	98.2856	0	0	0	0	0	0	0.291844	0.229225	-0.000949453	0.00429514	0.0033909	0.00533502	-0.001492	0.491828	0.102224	0.114974	0.0563342	TRUE	FALSE	FALSE	FALSE	388.63	435.72	5.08	6.02	7.03	0	1.1	21.89	16.46	0	0.15	22.5
14:55:30	1179.46	1092.1	98.2856	0	0	0	0	0	0	0.291392	0.228999	-0.000768605	0.00531242	0.00463423	0.00538023	-0.001492	0.491195	0.10245	0.115065	0.056289	TRUE	FALSE	FALSE	FALSE	388.63	435.72	5.08	6.02	7.03	0	1.1	21.89	16.46	0	0.15	22.5
14:55:31	1179.46	1092.1	98.2856	0	0	0	0	0	0	0.291844	0.229225	-0.000768605	0.00632969	0.00587757	0.00538023	-0.00144678	0.492054	0.102631	0.114974	0.0563794	TRUE	FALSE	FALSE	FALSE	388.63	435.72	5.08	6.02	7.03	0	1.1	21.88	16.46	0	0.15	22.5
14:55:32	1179.46	1092.1	98.2856	0	0	0	0	0	0	0.292296	0.229564	-0.000949453	0.00768605	0.00768605	0.00533502	-0.001492	0.491648	0.102857	0.115065	0.056289	TRUE	FALSE	FALSE	FALSE	388.63	435.72	5.08	6.02	7.03	0	1.1	21.88	16.46	0	0.15	22.5
14:55:33	1179.46	1092.1	98.2856	0	0	0	0	0	0	0.291731	0.228999	-0.000813817	0.00847726	0.00836423	0.00538023	-0.001492	0.491602	0.102903	0.11511	0.0563342	TRUE	FALSE	FALSE	FALSE	387.57	435.72	5.08	6.02	7.03	0	1.1	21.87	16.46	0	0.15	22.5
14:55:34	1179.46	1092.1	98.2856	0	0	0	0	0	0	0.292183	0.229451	-0.000768605	0.00904241	0.00870332	0.00533502	-0.001492	0.491422	0.102993	0.115065	0.056289	TRUE	FALSE	FALSE	FALSE	387.57	435.72	5.06	6.02	7.03	0	1.1	21.87	16.4	0	0.15	22.5
14:55:35	1179.46	1092.1	98.2856	0	0	0	0	0	0	0.291957	0.228999	-0.000904241	0.00892938	0.00881635	0.00538023	-0.001492	0.491422	0.102993	0.115155	0.0563342	TRUE	FALSE	FALSE	FALSE	385.63	435.72	5.06	6.02	7.03	0	1.1	21.87	16.4	0	0.15	22.5
14:55:36	1179.46	1092.1	98.2856	0	0	0	0	0	0	0.291618	0.228886	-0.000542545	0.00892938	0.00881635	0.00538023	-0.001492	0.491964	0.103219	0.114974	0.056289	TRUE	FALSE	FALSE	FALSE	385.63	435.72	5.06	6.02	7.03	0	1.1	21.87	16.39	0	0.15	22.5
14:55:37	1179.46	1092.1	98.2856	0	0	0	0	0	0	0.291844	0.228999	-0.000723393	0.00904241	0.00870332	0.00538023	-0.001492	0.491919	0.103536	0.115065	0.0563342	TRUE	FALSE	FALSE	FALSE	385.49	435.72	5.06	6.02	7.03	0	1.1	21.87	16.39	0	0.15	22.5
14:55:38	1179.46	1103.02	98.2856	0	0	0	0	0	0	0.291618	0.229112	-0.000632969	0.00915544	0.00904241	0.00538023	-0.001492	0.491919	0.103626	0.115065	0.056289	TRUE	FALSE	FALSE	FALSE	385.49	435.72	5.05	6.02	7.03	0	1.1	21.87	16.37	0	0.15	22.5
14:55:39	1168.54	1092.1	98.2856	0	0	0	0	0	0	0.291618	0.228886	-0.000813817	0.00904241	0.00881635	0.00533502	-0.001492	0.491964	0.103671	0.114974	0.056289	TRUE	FALSE	FALSE	FALSE	385.99	435.72	5.05	6.02	7.03	0	1.1	21.87	16.37	0	0.15	22.5
14:55:40	1179.46	1092.1	98.2856	0	0	0	0	0	0	0.291392	0.229112	-0.000723393	0.00881635	0.00870332	0.00533502	-0.00153721	0.491693	0.103716	0.115065	0.056289	TRUE	FALSE	FALSE	FALSE	385.99	435.72	5.05	6.02	7.03	0	1.1	21.87	16.36	0	0.15	22.5
14:55:41	1179.46	1092.1	98.2856	0	0	0	0	0	0	0.291505	0.228886	-0.000813817	0.00881635	0.00892938	0.00533502	-0.001492	0.491783	0.104123	0.115019	0.056289	TRUE	FALSE	FALSE	FALSE	385.99	435.72	5.05	6.02	7.03	0	1.1	21.87	16.36	0	0.15	22.5
14:55:42	1179.46	1092.1	98.2856	0	0	0	0	0	0	0.291618	0.228886	-0.000813817	0.00892938	0.00881635	0.00533502	-0.00153721	0.491557	0.104078	0.115019	0.0563342	TRUE	FALSE	FALSE	FALSE	385.99	435.72	5.05	6.02	7.03	0	1.1	21.87	16.36	0	0.15	22.5
14:55:43	1179.46	1092.1	98.2856	0	0	0	0	0	0	0.291279	0.22866	-0.000859029	0.00904241	0.00881635	0.00538023	-0.00153721	0.491828	0.104259	0.115019	0.0562438	TRUE	FALSE	FALSE	FALSE	385.99	434.99	5.05	6.02	7.03	0	1.1	21.87	16.36	0	0.15	22.5
14:55:44	1179.46	1092.1	98.2856	0	0	0	0	0	0	0.291618	0.229112	-0.000949453	0.00904241	0.00870332	0.00533502	-0.001492	0.491422	0.104214	0.114974	0.0563342	TRUE	FALSE	FALSE	FALSE	385.99	434.99	5.05	6.02	7.03	0	1.1	21.87	16.36	0	0.15	22.5
14:55:45	1179.46	1092.1	98.2856	0	0	0	0	0	0	0.291618	0.229112	-0.000632969	0.00881635	0.00892938	0.00538023	-0.001492	0.491467	0.104168	0.115019	0.056289	TRUE	FALSE	FALSE	FALSE	385.99	434.94	5.05	6.02	7.03	0	1.1	21.87	16.36	0	0.15	22.5
14:55:46	1179.46	1092.1	98.2856	0	0	0	0	0	0	0.291618	0.228999	-0.000768605	0.00892938	0.00904241	0.00538023	-0.001492	0.491422	0.104349	0.115065	0.056289	TRUE	FALSE	FALSE	FALSE	385.99	434.94	5.05	6.02	7.03	0	1.1	21.87	16.36	0	0.15	22.5
14:55:47	1168.54	1092.1	98.2856	0	0	0	0	0	0	0.291618	0.228999	-0.000904241	0.00881635	0.00870332	0.00533502	-0.001492	0.491105	0.104621	0.115019	0.0563342	TRUE	FALSE	FALSE	FALSE	385.99	434.76	5.05	6.02	7.03	0	1.1	21.87	16.36	0	0.15	22.5
14:55:48	1179.46	1092.1	98.2856	0	0	0	0	0	0	0.291618	0.229112	-0.000904241	0.00881635	0.00881635	0.00538023	-0.001492	0.491241	0.104666	0.115065	0.0563342	TRUE	FALSE	FALSE	FALSE	385.99	434.76	5.05	6.02	7.03	0	1.1	21.87	16.36	0	0.15	22.5
14:55:49	1179.46	1092.1	98.2856	0	0	0	0	0	0	0.291844	0.229112	-0.000632969	0.00904241	0.00881635	0.00538023	-0.001492	0.491015	0.104937	0.115019	0.0563342	TRUE	FALSE	FALSE	FALSE	385.99	434.58	5.05	6.02	7.03	0	1.1	21.65	16.36	0	0.15	22.5
14:55:50	1179.46	1092.1	98.2856	0	0	0	0	0	0	0.291731	0.229112	-0.000542545	0.00904241	0.00881635	0.00542545	-0.00144678	0.491105	0.105163	0.114974	0.0563342	TRUE	FALSE	FALSE	FALSE	385.99	434.58	5.05	6.04	7.01	0	1.1	21.65	16.36	0	0.15	22.5
14:55:51	1179.46	1092.1	98.2856	0	0	0	0	0	0	0.291731	0.229112	-0.000542545	0.00881635	0.00881635	0.00538023	-0.00144678	0.490969	0.105208	0.115019	0.056289	TRUE	FALSE	FALSE	FALSE	385.99	434.58	5.05	6.04	7.01	0	1.1	21.65	16.36	0	0.15	22.5
14:55:52	1179.46	1092.1	98.2856	0	0	0	0	0	0	0.291731	0.229225	-0.000723393	0.00881635	0.00859029	0.00533502	-0.00144678	0.491015	0.105525	0.114929	0.056289	TRUE	FALSE	FALSE	FALSE	385.99	434.58	5.05	6.04	7.01	0	1.1	21.65	16.36	0	0.15	22.5
14:55:53	1168.54	1092.1	98.2856	0	0	0	0	0	0	0.291392	0.228999	-0.000723393	0.00870332	0.00847726	0.00528981	-0.001492	0.491015	0.105435	0.114974	0.0563342	TRUE	FALSE	FALSE	FALSE	385.3	434.58	5.05	6.04	7.01	0	1.1	21.64	16.36	0	0.15	22.5
14:55:54	1179.46	1092.1	98.2856	0	0	0	0	0	0	0.291844	0.228999	-0.000768605	0.00870332	0.00847726	0.00538023	-0.001492	0.490789	0.10548	0.115065	0.0563342	TRUE	FALSE	FALSE	FALSE	385.3	434.58	5.05	6.04	7.01	0	1.1	21.64	16.29	0	0.15	22.5
14:55:55	1179.46	1092.1	98.2856	0	0	0	0	0	0	0.291392	0.228886	-0.000632969	0.00859029	0.00836423	0.00538023	-0.00144678	0.490789	0.105661	0.1152	0.0563342	TRUE	FALSE	FALSE	FALSE	385.57	434.58	5.05	6.04	7.01	0	1.1	21.63	16.29	0	0.15	22.5
14:55:56	1179.46	1092.1	98.2856	0	0	0	0	0	0	0.291731	0.228886	-0.000813817	0.0082512	0.00813817	0.00538023	-0.001492	0.490517	0.105841	0.115065	0.0563342	TRUE	FALSE	FALSE	FALSE	385.57	434.58	5.05	6.04	7.01	0	1.1	21.63	16.28	0	0.15	22.5
14:55:57	1179.46	1103.02	98.2856	0	0	0	0	0	0	0.291731	0.229112	-0.000632969	0.0082512	0.00791211	0.00538023	-0.001492	0.490653	0.105887	0.115065	0.0563342	TRUE	FALSE	FALSE	FALSE	385.36	434.58	5.05	6.04	7.01	0	1.1	21.63	16.28	0	0.15	22.5
14:55:58	1179.46	1092.1	98.2856	0	0	0	0	0	0	0.291957	0.229112	-0.000859029	0.0082512	0.00802514	0.00533502	-0.00153721	0.490427	0.106022	0.115065	0.056289	TRUE	FALSE	FALSE	FALSE	385.36	434.58	5.04	6.04	7.01	0	1.1	21.63	16.26	0	0.15	22.5
14:55:59	1179.46	1081.17	98.2856	0	0	0	0	0	0	0.292296	0.229903	-0.000723393	0.00813817	0.00779908	0.00538023	-0.00153721	0.490382	0.106293	0.115019	0.0562438	TRUE	FALSE	FALSE	FALSE	385.77	434.58	5.04	6.04	7.01	0	1.09	21.63	16.26	0	0.15	22.5
14:56:00	1179.46	1103.02	98.2856	0	0	0	0	0	0	0.291844	0.229225	-0.000904241	0.00779908	0.00768605	0.00538023	-0.001492	0.490517	0.106429	0.115065	0.056289	TRUE	FALSE	FALSE	FALSE	385.77	434.58	5.03	6.04	7.01	0	1.09	21.63	16.25	0	0.15	22.5
14:56:01	1179.46	1092.1	98.2856	0	0	0	0	0	0	0.291618	0.228886	-0.000904241	0.00779908	0.00757302	0.00538023	-0.001492	0.49011	0.106293	0.115155	0.0563342	TRUE	FALSE	FALSE	FALSE	385.77	434.58	5.03	6.04	7.01	0	1.1	21.63	16.25	0	0.15	22.5
14:56:02	1179.46	1092.1	98.2856	0	0	0	0	0	0	0.291392	0.228999	-0.000768605	0.00791211	0.00757302	0.00533502	-0.001492	0.490382	0.106655	0.114974	0.056289	TRUE	FALSE	FALSE	FALSE	385.77	434.58	5.03	6.04	7.01	0	1.1	21.63	16.25	0	0.15	22.5
14:56:03	1168.54	1081.17	98.2856	0	0	0	0	0	0	0.291392	0.228999	-0.000678181	0.00779908	0.00757302	0.00538023	-0.001492	0.490382	0.106565	0.115065	0.0563342	TRUE	FALSE	FALSE	FALSE	385.77	433.67	5.03	6.04	7.01	0	1.1	21.63	16.25	0	0.15	22.5
14:56:04	1179.46	1103.02	98.2856	0	0	0	0	0	0	0.291618	0.228999	-0.000678181	0.00768605	0.00745999	0.00538023	-0.001492	0.489975	0.106836	0.114974	0.0563342	TRUE	FALSE	FALSE	FALSE	385.77	433.67	5.03	6.05	0	0	1.1	21.63	16.25	0	0.15	22.5
14:56:05	1179.46	1092.1	98.2856	0	0	0	0	0	0	0.291505	0.228886	-0.000678181	0.00768605	0.00734696	0.00528981	-0.001492	0.490156	0.106926	0.114974	0.0563342	TRUE	FALSE	FALSE	FALSE	385.77	433.57	5.03	6.05	0	0	1.1	21.63	16.25	0	0.15	22.5
14:56:06	1179.46	1081.17	98.2856	0	0	0	0	0	0	0.291618	0.229112	-0.000723393	0.00757302	0.00723393	0.00538023	-0.001492	0.490291	0.106972	0.115065	0.056289	TRUE	FALSE	FALSE	FALSE	385.77	433.57	5.03	6.05	0	0	1.1	21.63	16.25	0	0.15	22.5
14:56:07	1179.46	1092.1	98.2856	0	0	0	0	0	0	0.291618	0.228886	-0.000859029	0.00734696	0.0071209	0.00538023	-0.00153721	0.49002	0.106926	0.115019	0.0562438	TRUE	FALSE	FALSE	FALSE	385.77	433.45	5.03	6.05	0	0	1.1	21.63	16.25	0	0.15	22.5
14:56:08	1179.46	1092.1	98.2856	0	0	0	0	0	0	0.291731	0.229112	-0.000904241	0.00723393	0.00700787	0.00538023	-0.001492	0.489975	0.107198	0.115019	0.056289	TRUE	FALSE	FALSE	FALSE	385.77	433.45	5.03	6.06	0	0	1.1	21.63	16.25	0	0.15	22.5
14:56:09	1179.46	1092.1	98.2856	0	0	0	0	0	0	0.291392	0.228886	-0.000678181	0.00723393	0.00700787	0.00538023	-0.001492	0.489794	0.10765	0.115019	0.0563342	TRUE	FALSE	FALSE	FALSE	385.77	433.33	5.03	6.06	0	0	1.1	21.57	16.25	0	0.15	22.5
14:56:10	1179.46	1092.1	98.2856	0	0	0	0	0	0	0.291166	0.22866	-0.000904241	0.00700787	0.00689484	0.00538023	-0.001492	0.48993	0.10756	0.115019	0.056289	TRUE	FALSE	FALSE	FALSE	385.77	433.33	5.03	6.05	0	0	1.1	21.57	16.25	0	0.15	22.5
14:56:11	1168.54	1092.1	98.2856	0	0	0	0	0	0	0.291618	0.229112	-0.000587757	0.00700787	0.00678181	0.00538023	-0.001492	0.489568	0.107605	0.115155	0.0563342	TRUE	FALSE	FALSE	FALSE	385.77	433.33	5.03	6.05	0	0	1.1	21.57	16.25	0	0.15	22.5
14:56:12	1179.46	1092.1	98.2856	0	0	0	0	0	0	0.291618	0.228886	-0.000813817	0.00678181	0.00655575	0.00538023	-0.00144678	0.489839	0.10774	0.115019	0.0563342	TRUE	FALSE	FALSE	FALSE	385.77	433.33	5.03	6.05	0	0	1.1	21.57	16.25	0	0.15	22.5
14:56:13	1179.46	1092.1	98.2856	0	0	0	0	0	0	0.291618	0.228886	-0.000859029	0.00678181	0.00632969	0.00528981	-0.001492	0.489749	0.107876	0.115065	0.056289	TRUE	FALSE	FALSE	FALSE	383.92	433.33	5.03	6.05	0	0	1.1	21.49	16.25	0	0.15	22.5
14:56:14	1179.46	1092.1	98.2856	0	0	0	0	0	0	0.291618	0.228886	-0.000678181	0.00678181	0.00644272	0.00533502	-0.001492	0.489523	0.108328	0.115019	0.056289	TRUE	FALSE	FALSE	FALSE	383.92	433.33	5.03	6.05	0	0	1.1	21.49	16.19	0	0.15	22.5
14:56:15	1179.46	1092.1	98.2856	0	0	0	0	0	0	0.291618	0.228886	-0.000904241	0.00666878	0.00621666	0.00538023	-0.001492	0.489387	0.107921	0.115246	0.056289	TRUE	FALSE	FALSE	FALSE	383.78	433.33	5.03	6.05	0	0	1.1	21.49	16.19	0	0.15	22.5
14:56:16	1179.46	1092.1	98.2856	0	0	0	0	0	0	0.291505	0.228773	-0.000813817	0.00655575	0.00610363	0.00538023	-0.00153721	0.489206	0.108238	0.1152	0.056289	TRUE	FALSE	FALSE	FALSE	383.78	433.33	5.03	6.05	0	0	1.1	21.49	16.18	0	0.15	22.5
14:56:17	1168.54	1092.1	98.2856	0	0	0	0	0	0	0.291618	0.229112	-0.000723393	0.00632969	0.00587757	0.00542545	-0.001492	0.489613	0.108509	0.115019	0.056289	TRUE	FALSE	FALSE	FALSE	383.9	433.33	5.03	6.05	0	0	1.1	21.49	16.18	0	0.15	22.5
14:56:18	1179.46	1092.1	98.2856	0	0	0	0	0	0	0.291618	0.229112	-0.000813817	0.00632969	0.00587757	0.00538023	-0.00144678	0.489116	0.108283	0.114929	0.0562438	TRUE	FALSE	FALSE	FALSE	383.9	433.33	5.03	6.05	0	0	1.1	21.49	16.16	0	0.15	22.5
14:56:19	1179.46	1092.1	98.2856	0	0	0	0	0	0	0.291618	0.228999	-0.000632969	0.00621666	0.00565151	0.00538023	-0.001492	0.489251	0.108599	0.115019	0.0563342	TRUE	FALSE	FALSE	FALSE	384.11	433.33	5.03	6.05	0	0	1.1	21.49	16.16	0	0.15	22.5
14:56:20	1179.46	1092.1	98.2856	0	0	0	0	0	0	0.291844	0.229225	-0.000859029	0.00610363	0.00553848	0.00533502	-0.001492	0.489116	0.108735	0.114974	0.0563342	TRUE	FALSE	FALSE	FALSE	384.11	433.33	5.02	6.05	0	0	1.09	21.49	16.16	0	0.15	22.5
14:56:21	1179.46	1092.1	98.2856	0	0	0	0	0	0	0.291618	0.229112	-0.000632969	0.0059906	0.00542545	0.00533502	-0.001492	0.489297	0.108735	0.115065	0.056289	TRUE	FALSE	FALSE	FALSE	384.11	433.33	5.02	6.05	0	0	1.1	21.49	16.15	0	0.15	22.5
14:56:22	1179.46	1092.1	98.2856	0	0	0	0	0	0	0.291279	0.228886	-0.000678181	0.00587757	0.00542545	0.00538023	-0.001492	0.48889	0.108916	0.115065	0.0562438	TRUE	FALSE	FALSE	FALSE	384.11	433.33	5.02	6.05	0	0	1.1	21.49	16.15	0	0.15	22.5
14:56:23	1168.54	1092.1	98.2856	0	0	0	0	0	0	0.291618	0.229112	-0.000949453	0.00576454	0.00519938	0.00538023	-0.001492	0.489161	0.108961	0.115019	0.0563342	TRUE	FALSE	FALSE	FALSE	384.11	432.26	5.02	6.05	0	0	1.09	21.49	16.15	0	0.15	22.5
14:56:24	1179.46	1092.1	98.2856	0	0	0	0	0	0	0.291618	0.228999	-0.000723393	0.00565151	0.00508635	0.00538023	-0.001492	0.48889	0.109187	0.115019	0.056289	TRUE	FALSE	FALSE	FALSE	384.11	432.26	5.02	6.06	0	0	1.09	21.49	16.15	0	0.15	22.5
14:56:25	1179.46	1092.1	98.2856	0	0	0	0	0	0	0.291731	0.228999	-0.000678181	0.00553848	0.00497332	0.00533502	-0.001492	0.489116	0.109549	0.115065	0.056289	TRUE	FALSE	FALSE	FALSE	384.11	432.2	5.02	6.06	0	0	1.1	21.49	16.15	0	0.15	22.5
14:56:26	1179.46	1092.1	98.2856	0	0	0	0	0	0	0.291618	0.228886	-0.000723393	0.00553848	0.00497332	0.00538023	-0.001492	0.488438	0.109504	0.114929	0.056289	TRUE	FALSE	FALSE	FALSE	384.11	432.2	5.02	6.06	0	0	1.1	21.49	16.15	0	0.15	22.5
14:56:27	1179.46	1092.1	98.2856	0	0	0	0	0	0	0.291731	0.229112	-0.000678181	0.00531242	0.00486029	0.00538023	-0.001492	0.488528	0.109594	0.115019	0.056289	TRUE	FALSE	FALSE	FALSE	384.11	432.07	5.02	6.06	0	0	1.1	21.49	16.15	0	0.15	22.5
14:56:28	1168.54	1092.1	98.2856	0	0	0	0	0	0	0.292522	0.229338	-0.000859029	0.00542545	0.00474726	0.00542545	-0.00153721	0.488844	0.109594	0.114793	0.056289	TRUE	FALSE	FALSE	FALSE	384.11	432.07	5.02	6.07	0	0	1.1	21.49	16.15	0	0.15	22.5
14:56:29	1179.46	1092.1	98.2856	0	0	0	0	0	0	0.291957	0.229451	-0.000859029	0.00531242	0.00486029	0.00538023	-0.00153721	0.488347	0.109594	0.115155	0.0563342	TRUE	FALSE	FALSE	FALSE	384.11	431.93	5.02	6.07	0	0	1.1	21.49	16.15	0	0.15	22.4
14:56:30	1179.46	1092.1	98.2856	0	0	0	0	0	0	0.291731	0.229112	-0.000949453	0.00531242	0.00463423	0.00542545	-0.00144678	0.488528	0.109865	0.115065	0.0563342	TRUE	FALSE	FALSE	FALSE	384.11	431.93	5.02	6.06	0	0	1.1	21.44	16.15	0	0.15	22.4
14:56:31	1179.46	1103.02	98.2856	0	0	0	0	0	0	0.291392	0.228999	-0.000813817	0.00531242	0.00463423	0.00533502	-0.001492	0.488528	0.110408	0.115065	0.056289	TRUE	FALSE	FALSE	FALSE	384.11	431.93	5.02	6.06	0	0	1.1	21.44	16.15	0	0.15	22.4
14:56:32	1179.46	1092.1	98.2856	0	0	0	0	0	0	0.291731	0.228886	-0.000678181	0.00519938	0.00452121	0.00538023	-0.00153721	0.488618	0.110182	0.115065	0.056289	TRUE	FALSE	FALSE	FALSE	384.11	431.93	5.02	6.06	0	0	1.1	21.44	16.15	0	0.15	22.4
14:56:33	1179.46	1092.1	98.2856	0	0	0	0	0	0	0.291618	0.228886	-0.000813817	0.00508635	0.00440817	0.00538023	-0.001492	0.488121	0.110498	0.1152	0.056289	TRUE	FALSE	FALSE	FALSE	383.78	431.93	5.02	6.06	0	0	1.1	21.44	16.15	0	0.15	22.4
14:56:34	1179.46	1092.1	98.2856	0	0	0	0	0	0	0.291844	0.229451	-0.000678181	0.00508635	0.00452121	0.00528981	-0.00144678	0.488211	0.110544	0.114929	0.056289	TRUE	FALSE	FALSE	FALSE	383.78	431.93	5	6.06	0	0	1.1	21.43	16.15	0	0.15	22.4
14:56:35	1179.46	1092.1	98.2856	0	0	0	0	0	0	0.291279	0.228886	-0.000768605	0.00497332	0.00440817	0.00538023	-0.00153721	0.488076	0.110498	0.114929	0.0561986	TRUE	FALSE	FALSE	FALSE	384.35	431.93	5	6.06	0	0	1.1	21.43	16.09	0	0.15	22.4
14:56:36	1179.46	1092.1	98.2856	0	0	0	0	0	0	0.291618	0.228999	-0.000768605	0.00508635	0.00429514	0.00538023	-0.001492	0.488618	0.110544	0.115019	0.0563342	TRUE	FALSE	FALSE	FALSE	384.35	431.93	4.99	6.06	0	0	1.1	21.43	16.09	0	0.15	22.4
14:56:37	1168.54	1092.1	98.2856	0	0	0	0	0	0	0.291844	0.229225	-0.000904241	0.00497332	0.00429514	0.00538023	-0.001492	0.488754	0.110815	0.115155	0.0563342	TRUE	FALSE	FALSE	FALSE	384.16	431.93	4.99	6.06	0	0	1.1	21.43	16.08	0	0.15	22.4
14:56:38	1179.46	1092.1	98.2856	0	0	0	0	0	0	0.291731	0.229112	-0.000813817	0.00486029	0.00440817	0.00538023	-0.001492	0.489975	0.111041	0.115065	0.056289	TRUE	FALSE	FALSE	FALSE	384.16	431.93	4.99	6.06	0	0	1.1	21.43	16.08	0	0.15	22.4
14:56:39	1179.46	1092.1	98.2856	0	0	0	0	0	0	0.291618	0.229112	-0.000904241	0.00486029	0.00406908	0.00538023	-0.001492	0.489432	0.111131	0.114974	0.056289	TRUE	FALSE	FALSE	FALSE	382.39	431.93	4.99	6.06	0	0	1.1	21.43	16.07	0	0.15	22.4
14:56:40	1179.46	1092.1	98.2856	0	0	0	0	0	0	0.291505	0.229112	-0.000768605	0.00474726	0.00406908	0.00538023	-0.00153721	0.490065	0.111131	0.115065	0.056289	TRUE	FALSE	FALSE	FALSE	382.39	431.93	4.99	6.06	0	0	1.09	21.43	16.07	0	0.15	22.4
14:56:41	1179.46	1092.1	98.2856	0	0	0	0	0	0	0.291618	0.228886	-0.000768605	0.00486029	0.00395605	0.00538023	-0.001492	0.490336	0.111357	0.115155	0.0563342	TRUE	FALSE	FALSE	FALSE	382.39	431.93	4.99	6.06	0	0	1.09	21.43	16.07	0	0.15	22.4
14:56:42	1168.54	1092.1	98.2856	0	0	0	0	0	0	0.291279	0.228773	-0.000678181	0.00474726	0.00395605	0.00538023	-0.001492	0.49106	0.111493	0.114974	0.0563342	TRUE	FALSE	FALSE	FALSE	382.39	431.93	4.99	6.06	0	0	1.1	21.43	16.07	0	0.15	22.3
14:56:43	1179.46	1092.1	98.2856	0	0	0	0	0	0	0.291279	0.228886	-0.000813817	0.00474726	0.00384302	0.00533502	-0.00153721	0.489523	0.111674	0.115065	0.056289	TRUE	FALSE	FALSE	FALSE	382.39	433.68	4.99	6.06	0	0	1.1	21.43	16.07	0	0.15	22.2
14:56:44	1179.46	1092.1	87.3648	0	0	0	0	0	0	0.291392	0.228773	-0.000859029	0.00463423	0.00384302	0.00538023	-0.001492	0.492145	0.111674	0.115065	0.0563342	TRUE	FALSE	FALSE	FALSE	382.39	433.68	4.99	6.07	0	0	1.1	21.43	16.07	0	0.15	22.2
14:56:45	1179.46	1092.1	98.2856	0	0	0	0	0	0	0.291505	0.228886	-0.000813817	0.00463423	0.00384302	0.00538023	-0.00144678	0.490969	0.112081	0.115065	0.056289	TRUE	FALSE	FALSE	FALSE	382.39	433.55	4.99	6.07	0	0	1.1	21.43	16.07	0	0.15	22.2
14:56:46	1168.54	1092.1	98.2856	0	0	0	0	0	0	0.291279	0.228886	-0.000678181	0.00463423	0.00372999	0.00538023	-0.00153721	0.492145	0.112171	0.115065	0.056289	TRUE	FALSE	FALSE	FALSE	382.39	433.55	4.99	6.07	0	0	1.1	21.43	16.07	0	0.16	22.2
14:56:47	1179.46	1092.1	98.2856	0	0	0	0	0	0	0.291392	0.228999	-0.000949453	0.00452121	0.00384302	0.00538023	-0.001492	0.492642	0.112126	0.115065	0.0563342	TRUE	FALSE	FALSE	FALSE	382.39	433.35	4.99	6.07	0	0	1.1	21.43	16.07	0	0.16	22.2
14:56:48	1179.46	1092.1	98.2856	0	0	0	0	0	0	0.291279	0.228773	-0.000632969	0.00452121	0.00372999	0.00538023	-0.001492	0.492823	0.112216	0.115019	0.0563794	TRUE	FALSE	FALSE	FALSE	382.39	433.35	4.99	6.07	0	0	1.1	21.43	16.07	0	0.15	22.2
14:56:49	1179.46	1092.1	98.2856	0	0	0	0	0	0	0.291166	0.22866	-0.000587757	0.00440817	0.00361696	0.00542545	-0.00153721	0.492642	0.112442	0.115019	0.056289	TRUE	FALSE	FALSE	FALSE	382.39	433.26	4.99	6.07	0	0	1.1	21.43	16.07	0	0.15	22.2
14:56:50	1179.46	1092.1	98.2856	0	0	0	0	0	0	0.291053	0.228773	-0.000813817	0.00429514	0.00361696	0.00542545	-0.001492	0.49332	0.112442	0.115019	0.0563342	TRUE	FALSE	FALSE	FALSE	382.39	433.26	4.99	6.07	0	0	1.1	21.32	16.07	0	0.15	22.2
14:56:51	1168.54	1092.1	98.2856	0	0	0	0	0	0	0.292183	0.229112	-0.000994665	0.00440817	0.00350393	0.00533502	-0.001492	0.494496	0.112894	0.115019	0.0563794	TRUE	FALSE	FALSE	FALSE	382.39	433.26	4.99	6.07	0	0	1.1	21.32	16.07	0	0.15	22.2
14:56:52	1179.46	1092.1	98.2856	0	0	0	0	0	0	0.291166	0.228773	-0.000678181	0.00440817	0.00361696	0.00538023	-0.001492	0.494315	0.112714	0.115155	0.0563794	TRUE	FALSE	FALSE	FALSE	382.39	433.26	4.99	6.07	0	0	1.1	21.32	16.07	0	0.15	22.2
14:56:53	1179.46	1092.1	98.2856	0	0	0	0	0	0	0.291053	0.22866	-0.000587757	0.00440817	0.00350393	0.00538023	-0.00144678	0.495038	0.112804	0.115155	0.056289	TRUE	FALSE	FALSE	FALSE	382.89	433.26	4.99	6.07	0	0	1.1	21.32	16.07	0	0.15	22.2
14:56:54	1179.46	1081.17	98.2856	0	0	0	0	0	0	0.291279	0.228999	-0.000813817	0.00452121	0.00350393	0.00538023	-0.00153721	0.4954	0.112804	0.115065	0.056289	TRUE	FALSE	FALSE	FALSE	382.89	433.26	4.98	6.07	0	0	1.1	21.31	16.07	0	0.15	22.2
14:56:55	1168.54	1092.1	98.2856	0	0	0	0	0	0	0.291279	0.228999	-0.000768605	0.00429514	0.0033909	0.00542545	-0.00153721	0.496259	0.113075	0.114929	0.056289	TRUE	FALSE	FALSE	FALSE	382.89	433.26	4.98	6.07	0	0	1.1	21.31	15.91	0	0.15	22.2
14:56:56	1179.46	1092.1	98.2856	0	0	0	0	0	0	0.291279	0.228999	-0.000723393	0.00440817	0.0033909	0.00533502	-0.001492	0.496033	0.113256	0.115019	0.056289	TRUE	FALSE	FALSE	FALSE	384.02	433.26	4.98	6.07	0	0	1.1	21.31	15.91	0	0.15	22.2
14:56:57	1179.46	1092.1	98.2856	0	0	0	0	0	0	0.291166	0.22866	-0.000768605	0.00440817	0.00350393	0.00538023	-0.00144678	0.4954	0.113347	0.114929	0.056289	TRUE	FALSE	FALSE	FALSE	384.02	433.26	4.98	6.07	0	0	1.1	21.31	15.9	0	0.15	22.2
14:56:58	1179.46	1092.1	98.2856	0	0	0	0	0	0	0.291053	0.228773	-0.000632969	0.00440817	0.00327787	0.00542545	-0.001492	0.495988	0.113663	0.114974	0.0563794	TRUE	FALSE	FALSE	FALSE	383.05	433.26	4.98	6.07	0	0	1.1	21.31	15.9	0	0.15	22.2
14:56:59	1168.54	1092.1	98.2856	0	0	0	0	0	0	0.291166	0.228886	-0.000949453	0.00440817	0.00305181	0.00538023	-0.00153721	0.496304	0.113527	0.114974	0.0563342	TRUE	FALSE	FALSE	FALSE	383.05	433.26	4.98	6.07	0	0	1.1	21.31	15.89	0	0.15	22.2
14:57:00	1179.46	1092.1	98.2856	0	0	0	0	0	0	0.291166	0.22866	-0.000723393	0.00429514	0.00316484	0.00542545	-0.001492	0.49644	0.113708	0.115019	0.0561534	TRUE	FALSE	FALSE	FALSE	382.47	433.26	4.98	6.07	0	0	1.09	21.31	15.89	0	0.15	22.2
14:57:01	1179.46	1092.1	98.2856	0	0	0	0	0	0	0.291053	0.228434	-0.000587757	0.00418211	0.0033909	0.00533502	-0.001492	0.496892	0.113708	0.115336	0.056289	TRUE	FALSE	FALSE	FALSE	382.47	433.26	4.98	6.07	0	0	1.09	21.31	15.89	0	0.15	22.2
14:57:02	1168.54	1092.1	98.2856	0	0	0	0	0	0	0.291166	0.228547	-0.000678181	0.00429514	0.0033909	0.00538023	-0.00153721	0.497209	0.11398	0.115019	0.0563342	TRUE	FALSE	FALSE	FALSE	382.47	433.26	4.98	6.07	0	0	1.09	21.31	15.89	0	0.15	22.4
14:57:03	1179.46	1092.1	87.3648	0	0	0	0	0	0	0.291166	0.228886	-0.000813817	0.00429514	0.00305181	0.00533502	-0.001492	0.498791	0.11407	0.115019	0.0562438	TRUE	FALSE	FALSE	FALSE	382.47	433.26	4.98	6.07	0	0	1.09	21.31	15.89	0	0.15	22.4
14:57:04	1179.46	1092.1	98.2856	0	0	0	0	0	0	0.291279	0.228773	-0.000542545	0.00429514	0.00327787	0.00533502	-0.00153721	0.499107	0.113934	0.115155	0.0563342	TRUE	FALSE	FALSE	FALSE	382.47	430.34	4.98	6.07	0	0	1.09	21.31	15.89	0	0.15	22.4
14:57:05	1179.46	1092.1	98.2856	0	0	0	0	0	0	0.291505	0.228886	-0.000678181	0.00418211	0.00305181	0.00538023	-0.00153721	0.498655	0.114296	0.115065	0.056289	TRUE	FALSE	FALSE	FALSE	382.47	430.27	4.98	6.07	0	0	1.09	21.31	15.89	0	0.15	22.4
14:57:06	1179.46	1092.1	98.2856	0	0	0	0	0	0	0.291392	0.229112	-0.000723393	0.00440817	0.00293878	0.00533502	-0.001492	0.499786	0.114522	0.114974	0.0563794	TRUE	FALSE	FALSE	FALSE	382.47	430.27	4.98	6.07	0	0	1.09	21.31	15.89	0	0.15	22.3
14:57:07	1168.54	1092.1	98.2856	0	0	0	0	0	0	0.291279	0.22866	-0.000859029	0.00429514	0.00327787	0.00542545	-0.001492	0.49965	0.114432	0.115065	0.0563794	TRUE	FALSE	FALSE	FALSE	382.47	431.9	4.98	6.07	0	0	1.09	21.31	15.89	0	0.15	22.2
14:57:08	1179.46	1092.1	98.2856	0	0	0	0	0	0	0.29094	0.228773	-0.000723393	0.00429514	0.00327787	0.00542545	-0.00153721	0.500147	0.114658	0.115019	0.056289	TRUE	FALSE	FALSE	FALSE	382.47	431.9	4.98	6.07	0	0	1.09	21.31	15.89	0	0.15	22.2
14:57:09	1179.46	1092.1	98.2856	0	0	0	0	0	0	0.291618	0.228773	-0.000678181	0.00429514	0.00305181	0.00538023	-0.001492	0.499966	0.114613	0.115065	0.0563342	TRUE	FALSE	FALSE	FALSE	382.47	431.7	4.98	6.07	0	0	1.09	21.31	15.89	0	0.15	22.2
14:57:10	1179.46	1092.1	98.2856	0	0	0	0	0	0	0.292522	0.22979	-0.000813817	0.00429514	0.00305181	0.00538023	-0.001492	0.500645	0.114748	0.115019	0.056289	TRUE	FALSE	FALSE	FALSE	382.47	431.7	4.98	6.07	0	0	1.09	21.28	15.89	0	0.15	22.2
14:57:11	1179.46	1092.1	98.2856	0	0	0	0	0	0	0.292296	0.229677	-0.000813817	0.00429514	0.00305181	0.00538023	-0.001492	0.501097	0.114839	0.115065	0.0563342	TRUE	FALSE	FALSE	FALSE	382.47	431.7	4.98	6.07	0	0	1.09	21.28	15.89	0	0.15	22.2
14:57:12	1179.46	1092.1	98.2856	0	0	0	0	0	0	0.291731	0.228886	-0.000859029	0.00418211	0.00305181	0.00538023	-0.00144678	0.501187	0.114974	0.115019	0.0563342	TRUE	FALSE	FALSE	FALSE	382.47	431.7	4.98	6.07	0	0	1.09	21.27	15.89	0	0.15	22.2
14:57:13	1179.46	1092.1	98.2856	0	0	0	0	0	0	0.291618	0.228886	-0.000632969	0.00406908	0.00327787	0.00533502	-0.001492	0.501504	0.114974	0.115155	0.0563342	TRUE	FALSE	FALSE	FALSE	382.47	431.7	4.98	6.07	0	0	1.09	21.27	15.89	0	0.15	22.2
14:57:14	1179.46	1092.1	98.2856	0	0	0	0	0	0	0.291392	0.228886	-0.000723393	0.00429514	0.00305181	0.00538023	-0.001492	0.501594	0.1152	0.114974	0.0563342	TRUE	FALSE	FALSE	FALSE	380.79	431.7	4.98	6.07	0	0	1.09	21.28	15.89	0	0.15	22.2
14:57:15	1179.46	1092.1	98.2856	0	0	0	0	0	0	0.291166	0.228773	-0.000768605	0.00418211	0.00305181	0.00533502	-0.00153721	0.501685	0.1152	0.115019	0.0563342	TRUE	FALSE	FALSE	FALSE	380.79	431.7	4.95	6.07	0	0	1.09	21.28	15.82	0	0.15	22.2
14:57:16	1179.46	1092.1	98.2856	0	0	0	0	0	0	0.29207	0.229225	-0.000678181	0.00418211	0.00305181	0.00538023	-0.00153721	0.502182	0.115472	0.115155	0.0563342	TRUE	FALSE	FALSE	FALSE	380.47	431.7	4.95	6.07	0	0	1.09	21.28	15.82	0	0.15	22.2
14:57:17	1179.46	1092.1	98.2856	0	0	0	0	0	0	0.291844	0.229225	-0.000768605	0.00429514	0.00305181	0.00538023	-0.00153721	0.502498	0.115517	0.115019	0.056289	TRUE	FALSE	FALSE	FALSE	380.47	431.7	4.95	6.07	0	0	1.09	21.28	15.81	0	0.15	22.2
14:57:18	1179.46	1103.02	98.2856	0	0	0	0	0	0	0.291392	0.228773	-0.000678181	0.00418211	0.00305181	0.00533502	-0.001492	0.502317	0.115652	0.115065	0.056289	TRUE	FALSE	FALSE	FALSE	380.7	431.7	4.95	6.07	0	0	1.09	21.28	15.81	0	0.15	22.2
14:57:19	1179.46	1092.1	98.2856	0	0	0	0	0	0	0.291731	0.228773	-0.000632969	0.00418211	0.00305181	0.00533502	-0.00153721	0.503312	0.115743	0.115019	0.0563342	TRUE	FALSE	FALSE	FALSE	380.7	431.7	4.95	6.07	0	0	1.09	21.28	15.8	0	0.15	22.2
14:57:20	1179.46	1092.1	98.2856	0	0	0	0	0	0	0.291731	0.229112	-0.000542545	0.00429514	0.00305181	0.00538023	-0.001492	0.503674	0.115788	0.114974	0.056289	TRUE	FALSE	FALSE	FALSE	380.92	431.7	4.95	6.07	0	0	1.09	21.28	15.8	0	0.15	22.2
14:57:21	1168.54	1092.1	98.2856	0	0	0	0	0	0	0.291957	0.229338	-0.000678181	0.00429514	0.00305181	0.00538023	-0.00153721	0.503945	0.115788	0.11511	0.0563342	TRUE	FALSE	FALSE	FALSE	380.92	431.7	4.94	6.07	0	0	1.09	21.28	15.79	0	0.15	22.2
14:57:22	1179.46	1092.1	98.2856	0	0	0	0	0	0	0.291392	0.228886	-0.000542545	0.00429514	0.00305181	0.00533502	-0.001492	0.504171	0.116014	0.114974	0.056289	TRUE	FALSE	FALSE	FALSE	380.92	431.7	4.94	6.07	0	0	1.09	21.28	15.79	0	0.15	22.2
14:57:23	1179.46	1092.1	98.2856	0	0	0	0	0	0	0.291392	0.228773	-0.000678181	0.00418211	0.00305181	0.00538023	-0.00153721	0.504714	0.115969	0.115065	0.0563342	TRUE	FALSE	FALSE	FALSE	380.92	431.7	4.94	6.07	0	0	1.09	21.28	15.79	0	0.15	22.2
14:57:24	1179.46	1092.1	87.3648	0	0	0	0	0	0	0.291618	0.228773	-0.000587757	0.00429514	0.00305181	0.00538023	-0.001492	0.504623	0.11615	0.114974	0.0563342	TRUE	FALSE	FALSE	FALSE	380.92	430.38	4.94	6.07	0	0	1.09	21.28	15.79	0	0.15	22.2
14:57:25	1179.46	1092.1	98.2856	0	0	0	0	0	0	0.291618	0.228999	-0.000723393	0.00406908	0.00293878	0.00538023	-0.001492	0.504849	0.116195	0.115155	0.056289	TRUE	FALSE	FALSE	FALSE	380.92	430.38	4.94	6.07	0	0	1.09	21.28	15.79	0	0.15	22.2
14:57:26	1179.46	1092.1	98.2856	0	0	0	0	0	0	0.291731	0.228773	-0.000587757	0.00418211	0.00305181	0.00542545	-0.001492	0.505076	0.116557	0.115065	0.0563342	TRUE	FALSE	FALSE	FALSE	380.92	430.22	4.94	6.07	0	0	1.09	21.28	15.79	0	0.15	22.2
14:57:27	1179.46	1092.1	98.2856	0	0	0	0	0	0	0.291618	0.228773	-0.000813817	0.00418211	0.00305181	0.00533502	-0.00153721	0.505076	0.116511	0.115019	0.056289	TRUE	FALSE	FALSE	FALSE	380.92	430.22	4.94	6.07	0	0	1.09	21.28	15.79	0	0.15	22.2
14:57:28	1179.46	1092.1	98.2856	0	0	0	0	0	0	0.291957	0.229225	-0.000768605	0.00418211	0.00316484	0.00533502	-0.00153721	0.50598	0.116737	0.114929	0.0563342	TRUE	FALSE	FALSE	FALSE	380.92	430.01	4.94	6.07	0	0	1.09	21.28	15.79	0	0.15	22.2
14:57:29	1179.46	1092.1	98.2856	0	0	0	0	0	0	0.292183	0.229225	-0.000678181	0.00418211	0.00305181	0.00538023	-0.001492	0.506251	0.116602	0.114974	0.0563342	TRUE	FALSE	FALSE	FALSE	380.92	430.01	4.94	6.07	0	0	1.09	21.28	15.79	0	0.15	22.2
14:57:30	1179.46	1092.1	98.2856	0	0	0	0	0	0	0.291844	0.229112	-0.000542545	0.00429514	0.00305181	0.00538023	-0.00153721	0.506341	0.116964	0.115155	0.056289	TRUE	FALSE	FALSE	FALSE	380.92	429.88	4.94	6.07	0	0	1.09	21.25	15.79	0	0.15	22.2
14:57:31	1179.46	1092.1	98.2856	0	0	0	0	0	0	0.291731	0.229112	-0.000768605	0.00418211	0.00316484	0.00533502	-0.001492	0.506748	0.116964	0.115019	0.056289	TRUE	FALSE	FALSE	FALSE	380.92	429.88	4.94	6.07	0	0	1.09	21.25	15.79	0	0.15	22.2
14:57:32	1168.54	1092.1	98.2856	0	0	0	0	0	0	0.291844	0.229112	-0.000949453	0.00418211	0.00293878	0.00538023	-0.00153721	0.507201	0.117054	0.115065	0.056289	TRUE	FALSE	FALSE	FALSE	380.92	429.88	4.94	6.07	0	0	1.09	21.25	15.79	0	0.15	22.2
14:57:33	1179.46	1092.1	98.2856	0	0	0	0	0	0	0.291957	0.229225	-0.000678181	0.00418211	0.00305181	0.00538023	-0.00153721	0.507381	0.11719	0.115065	0.0562438	TRUE	FALSE	FALSE	FALSE	380.92	429.88	4.94	6.07	0	0	1.09	21.25	15.79	0	0.15	22.2
14:57:34	1179.46	1092.1	98.2856	0	0	0	0	0	0	0.291844	0.229112	-0.000678181	0.00429514	0.00305181	0.00538023	-0.001492	0.507879	0.11728	0.115019	0.0563342	TRUE	FALSE	FALSE	FALSE	381.09	429.88	4.94	6.07	0	0	1.09	21.25	15.79	0	0.15	22.2
14:57:35	1179.46	1092.1	98.2856	0	0	0	0	0	0	0.291844	0.229112	-0.000632969	0.00418211	0.00305181	0.00533502	-0.001492	0.507698	0.117325	0.115065	0.056289	TRUE	FALSE	FALSE	FALSE	381.09	429.88	4.93	6.07	0	0	1.09	21.25	15.72	0	0.15	22.2
14:57:36	1179.46	1092.1	98.2856	0	0	0	0	0	0	0.291957	0.229225	-0.000678181	0.00406908	0.00305181	0.00538023	-0.001492	0.508557	0.117416	0.115065	0.056289	TRUE	FALSE	FALSE	FALSE	380.7	429.88	4.93	6.07	0	0	1.09	21.25	15.72	0	0.15	22.2
14:57:37	1179.46	1092.1	98.2856	0	0	0	0	0	0	0.291731	0.229112	-0.000406908	0.00429514	0.00305181	0.00542545	-0.001492	0.508421	0.117551	0.115019	0.056289	TRUE	FALSE	FALSE	FALSE	380.7	429.88	4.93	6.07	0	0	1.09	21.25	15.71	0	0.15	22.1
14:57:38	1179.46	1092.1	98.2856	0	0	0	0	0	0	0.291731	0.229225	-0.000768605	0.00418211	0.00305181	0.00538023	-0.00153721	0.508873	0.117777	0.114974	0.056289	TRUE	FALSE	FALSE	FALSE	380.68	429.88	4.93	6.07	0	0	1.09	21.25	15.71	0	0.15	22
14:57:39	1168.54	1092.1	98.2856	0	0	0	0	0	0	0.291957	0.229338	-0.000632969	0.00418211	0.00305181	0.00538023	-0.001492	0.508466	0.117868	0.115065	0.056289	TRUE	FALSE	FALSE	FALSE	380.68	429.88	4.93	6.07	0	0	1.09	21.25	15.7	0	0.15	22
14:57:40	1179.46	1092.1	98.2856	0	0	0	0	0	0	0.29207	0.229338	-0.000678181	0.00429514	0.00327787	0.00533502	-0.001492	0.509913	0.118003	0.115155	0.056289	TRUE	FALSE	FALSE	FALSE	381.68	429.88	4.93	6.07	0	0	1.09	21.25	15.7	0	0.15	22
14:57:41	1179.46	1092.1	98.2856	0	0	0	0	0	0	0.291844	0.228999	-0.000542545	0.00429514	0.00305181	0.00538023	-0.00153721	0.510004	0.117913	0.115155	0.056289	TRUE	FALSE	FALSE	FALSE	381.68	429.88	4.93	6.07	0	0	1.09	21.25	15.7	0	0.15	22
14:57:42	1179.46	1092.1	98.2856	0	0	0	0	0	0	0.291844	0.229338	-0.000723393	0.00429514	0.00305181	0.00533502	-0.00153721	0.510501	0.118049	0.114839	0.056289	TRUE	FALSE	FALSE	FALSE	381.68	429.88	4.93	6.07	0	0	1.1	21.25	15.7	0	0.15	22
14:57:43	1179.46	1092.1	98.2856	0	0	0	0	0	0	0.291844	0.229225	-0.000587757	0.00418211	0.00305181	0.00538023	-0.001492	0.510456	0.118139	0.115019	0.0563794	TRUE	FALSE	FALSE	FALSE	381.68	429.88	4.93	6.07	0	0	1.1	21.25	15.7	0	0.15	22
14:57:44	1179.46	1092.1	98.2856	0	0	0	0	0	0	0.291844	0.229112	-0.000723393	0.00429514	0.00305181	0.00533502	-0.001492	0.510546	0.118275	0.1152	0.0563794	TRUE	FALSE	FALSE	FALSE	381.68	430.15	4.93	6.07	0	0	1.1	21.25	15.7	0	0.15	22.1
14:57:45	1179.46	1092.1	87.3648	0	0	0	0	0	0	0.291844	0.229112	-0.000587757	0.00406908	0.00305181	0.00533502	-0.001492	0.510546	0.118456	0.1152	0.056289	TRUE	FALSE	FALSE	FALSE	381.68	430.15	4.93	6.07	0	0	1.1	21.25	15.7	0	0.16	22
14:57:46	1168.54	1092.1	98.2856	0	0	0	0	0	0	0.29207	0.229338	-0.000723393	0.00418211	0.00305181	0.00538023	-0.00153721	0.511224	0.118636	0.115065	0.0563342	TRUE	FALSE	FALSE	FALSE	381.68	430.02	4.93	6.07	0	0	1.1	21.25	15.7	0	0.16	22
14:57:47	1179.46	1103.02	98.2856	0	0	0	0	0	0	0.291844	0.228999	-0.000632969	0.00418211	0.00305181	0.00533502	-0.00153721	0.511676	0.118636	0.115019	0.056289	TRUE	FALSE	FALSE	FALSE	381.68	430.02	4.93	6.07	0	0	1.1	21.25	15.7	0	0.15	22
14:57:48	1179.46	1092.1	98.2856	0	0	0	0	0	0	0.291844	0.229338	-0.000768605	0.00418211	0.00293878	0.00538023	-0.00153721	0.511722	0.118998	0.114974	0.056289	TRUE	FALSE	FALSE	FALSE	381.68	429.84	4.93	6.07	0	0	1.1	21.25	15.7	0	0.15	22
14:57:49	1179.46	1092.1	98.2856	0	0	0	0	0	0	0.291957	0.229112	-0.000632969	0.00418211	0.00293878	0.00538023	-0.001492	0.512309	0.118998	0.115065	0.056289	TRUE	FALSE	FALSE	FALSE	381.68	429.84	4.93	6.07	0	0	1.1	21.25	15.7	0	0.15	22
14:57:50	1179.46	1092.1	98.2856	0	0	0	0	0	0	0.292183	0.229338	-0.000587757	0.00429514	0.00305181	0.00533502	-0.001492	0.512445	0.118998	0.11511	0.0563342	TRUE	FALSE	FALSE	FALSE	381.68	429.59	4.93	6.07	0	0	1.1	21.23	15.7	0	0.15	22
14:57:51	1179.46	1092.1	98.2856	0	0	0	0	0	0	0.29207	0.229451	-0.000632969	0.00418211	0.00305181	0.00538023	-0.001492	0.512761	0.118953	0.115155	0.0563342	TRUE	FALSE	FALSE	FALSE	381.68	429.59	4.93	6.07	0	0	1.1	21.23	15.7	0	0.16	22
14:57:52	1179.46	1092.1	98.2856	0	0	0	0	0	0	0.291844	0.228999	-0.000361696	0.00429514	0.00305181	0.00533502	-0.001492	0.512761	0.119179	0.114974	0.056289	TRUE	FALSE	FALSE	FALSE	381.68	429.59	4.93	6.07	0	0	1.1	21.23	15.7	0	0.16	22
14:57:53	1179.46	1092.1	98.2856	0	0	0	0	0	0	0.292409	0.229225	-0.000632969	0.00429514	0.00327787	0.00538023	-0.001492	0.513485	0.119269	0.115065	0.0563342	TRUE	FALSE	FALSE	FALSE	381.68	429.59	4.93	6.07	0	0	1.1	21.23	15.7	0	0.16	22
14:57:54	1179.46	1092.1	98.2856	0	0	0	0	0	0	0.291957	0.229225	-0.000723393	0.00418211	0.00327787	0.00538023	-0.00153721	0.513892	0.119179	0.115065	0.056289	TRUE	FALSE	FALSE	FALSE	380.84	429.59	4.93	6.07	0	0	1.1	21.23	15.7	0	0.16	22
14:57:55	1168.54	1103.02	98.2856	0	0	0	0	0	0	0.291957	0.229225	-0.000723393	0.00418211	0.00305181	0.00533502	-0.001492	0.514434	0.119495	0.115065	0.056289	TRUE	FALSE	FALSE	FALSE	380.84	429.59	4.9	6.07	0	0	1.1	21.23	15.7	0	0.16	22
14:57:56	1179.46	1092.1	98.2856	0	0	0	0	0	0	0.291844	0.229225	-0.00045212	0.00418211	0.00305181	0.00538023	-0.00140157	0.514254	0.11945	0.115019	0.056289	TRUE	FALSE	FALSE	FALSE	380.47	429.59	4.9	6.07	0	0	1.1	21.23	15.64	0	0.16	22
14:57:57	1179.46	1092.1	98.2856	0	0	0	0	0	0	0.29207	0.229564	-0.000587757	0.00418211	0.00293878	0.00538023	-0.001492	0.514525	0.119586	0.115065	0.056289	TRUE	FALSE	FALSE	FALSE	380.47	429.59	4.9	6.07	0	0	1.1	21.23	15.64	0	0.16	22
14:57:58	1179.46	1092.1	98.2856	0	0	0	0	0	0	0.29207	0.229338	-0.000587757	0.00418211	0.00327787	0.00533502	-0.001492	0.515067	0.119631	0.114974	0.0563342	TRUE	FALSE	FALSE	FALSE	381	429.59	4.9	6.07	0	0	1.1	21.23	15.62	0	0.16	22
14:57:59	1179.46	1092.1	98.2856	0	0	0	0	0	0	0.291844	0.229225	-0.000542545	0.00418211	0.00293878	0.00533502	-0.001492	0.515384	0.119948	0.115065	0.0563342	TRUE	FALSE	FALSE	FALSE	381	429.59	4.9	6.07	0	0	1.1	21.23	15.62	0	0.16	22
14:58:00	1179.46	1092.1	98.2856	0	0	0	0	0	0	0.291957	0.229112	-0.000497333	0.0297269	0.00463423	0.00538023	-0.00153721	0.517328	0.119315	0.115652	0.056289	TRUE	TRUE	FALSE	FALSE	380.7	429.59	4.9	6.07	0	0	1.1	21.23	15.61	0	0.16	22
14:58:01	1179.46	1092.1	98.2856	305.782	0	98.2856	0	0	0	0.29207	0.229338	-0.000632969	0.0853377	0.0474726	0.00538023	-0.001492	0.515926	0.119315	0.115065	0.056289	TRUE	TRUE	FALSE	FALSE	380.7	429.59	4.9	6.07	0	0	1.1	21.23	15.61	0	0.16	22
14:58:02	1179.46	1092.1	98.2856	666.174	174.731	163.81	0	0	0	0.291957	0.229225	-0.000678181	0.164685	0.129872	0.00538023	-0.001492	0.516469	0.119134	0.115155	0.056289	TRUE	TRUE	FALSE	FALSE	380.7	429.59	4.9	6.07	0	0	1.1	21.23	15.61	0	0.16	22
14:58:03	1179.46	1092.1	98.2856	644.332	316.702	98.2856	0	0	0	0.291844	0.229112	-0.00045212	0.239737	0.202437	0.00542545	-0.001492	0.516695	0.118501	0.115065	0.056289	TRUE	TRUE	FALSE	FALSE	380.7	429.59	4.9	6.07	0	0	1.1	21.23	15.61	0	0.16	22
14:58:04	1179.46	1092.1	87.3648	622.49	436.833	98.2856	0	0	0	0.291957	0.229225	-0.000542545	0.274437	0.241206	0.00538023	-0.00153721	0.516785	0.118184	0.115065	0.0563342	TRUE	TRUE	FALSE	FALSE	380.7	428.31	4.9	6.07	0	0	1.1	21.23	15.61	0	0.16	22
14:58:05	1179.46	1092.1	98.2856	589.727	469.596	98.2856	0	0	0	0.292635	0.229903	-0.000542545	0.285853	0.252622	0.00538023	-0.00153721	0.517599	0.117868	0.114974	0.056289	TRUE	TRUE	FALSE	FALSE	380.7	428.31	4.9	5.93	2.73	0	1.1	21.23	15.61	0	0.15	22
14:58:06	1179.46	1092.1	98.2856	600.648	491.438	87.3648	0	0	0	0.292296	0.229564	-0.000497333	0.289131	0.255787	0.00538023	-0.00153721	0.517464	0.117461	0.115291	0.056289	TRUE	TRUE	FALSE	FALSE	380.7	428.08	4.9	5.93	2.73	0	1.1	21.23	15.61	0	0.15	22
14:58:07	1179.46	1092.1	98.2856	589.727	502.359	98.2856	0	0	0	0.291957	0.229451	-0.000632969	0.289696	0.256465	0.00538023	-0.00153721	0.517328	0.117054	0.115291	0.056289	TRUE	TRUE	FALSE	FALSE	380.7	428.08	4.9	5.92	7.03	0	1.1	21.23	15.61	0	0.15	22
14:58:08	1179.46	1092.1	98.2856	589.727	491.438	87.3648	0	0	0	0.292183	0.229451	-0.000632969	0.290148	0.256691	0.00542545	-0.001492	0.517961	0.116737	0.115246	0.0563342	TRUE	TRUE	FALSE	FALSE	380.7	427.83	4.9	5.92	7.03	0	1.1	21.23	15.61	0	0.15	22
14:58:09	1179.46	1092.1	98.2856	589.727	502.359	87.3648	0	0	0	0.291957	0.229338	-0.000632969	0.289922	0.256691	0.00542545	-0.00153721	0.518594	0.11624	0.115517	0.056289	TRUE	TRUE	FALSE	FALSE	380.7	427.83	4.9	5.92	7.03	0	1.1	21.23	15.61	0	0.15	22
14:58:10	1168.54	1092.1	98.2856	589.727	502.359	87.3648	0	0	0	0.291957	0.229225	-0.000406908	0.289922	0.256691	0.00542545	-0.00153721	0.51882	0.116014	0.115426	0.056289	TRUE	TRUE	FALSE	FALSE	380.7	427.63	4.9	5.92	7.03	0	1.1	21.23	15.61	0	0.15	22
14:58:11	1179.46	1092.1	98.2856	589.727	502.359	98.2856	0	0	0	0.291844	0.229225	-0.000406908	0.289696	0.256239	0.00542545	-0.001492	0.519317	0.115472	0.115472	0.0563342	TRUE	TRUE	FALSE	FALSE	380.7	427.63	4.9	5.92	7.02	0	1.1	21.21	15.61	0	0.14	22
14:58:12	1179.46	1103.02	98.2856	589.727	491.438	87.3648	0	0	0	0.29207	0.229338	-0.000678181	0.289583	0.256691	0.00542545	-0.001492	0.519589	0.115065	0.115562	0.0563342	TRUE	TRUE	FALSE	FALSE	380.7	427.63	4.9	5.92	7.02	0	1.1	21.21	15.61	0	0.14	22
14:58:13	1179.46	1092.1	98.2856	589.727	502.359	87.3648	0	0	0	0.291957	0.229225	-0.000497333	0.289809	0.256578	0.00542545	-0.001492	0.520222	0.114839	0.115562	0.0563342	TRUE	TRUE	FALSE	FALSE	380.7	427.63	4.9	5.92	7.02	0	1.1	21.21	15.61	0	0.14	22
14:58:14	1179.46	1092.1	98.2856	589.727	502.359	87.3648	0	0	0	0.291957	0.229225	-0.00045212	0.289696	0.256352	0.00542545	-0.001492	0.520764	0.114206	0.115607	0.056289	TRUE	TRUE	FALSE	FALSE	379.84	427.63	4.9	5.92	7.02	0	1.1	21.21	15.61	0	0.14	22
14:58:15	1179.46	1092.1	98.2856	589.727	502.359	87.3648	0	0	0	0.291844	0.229338	-0.000361696	0.289583	0.256239	0.00538023	-0.001492	0.520809	0.113889	0.115607	0.056289	TRUE	TRUE	FALSE	FALSE	379.84	427.63	4.89	5.92	7.02	3.03	1.1	21.22	15.61	0	0.14	22
14:58:16	1168.54	1092.1	98.2856	589.727	502.359	98.2856	0	0	0	0.291957	0.229338	-0.000542545	0.289809	0.256126	0.00547066	-0.001492	0.52203	0.113527	0.116014	0.0563342	TRUE	TRUE	FALSE	FALSE	380.19	427.63	4.89	5.92	7.02	3.03	1.1	21.22	15.55	0	0.14	22
14:58:17	1179.46	1092.1	98.2856	589.727	491.438	87.3648	0	0	0	0.291844	0.229225	-0.000497333	0.289696	0.256126	0.00542545	-0.001492	0.522618	0.113075	0.116014	0.056289	TRUE	TRUE	FALSE	FALSE	380.19	427.63	4.88	5.92	7.02	3.01	1.1	21.15	15.55	0	0.14	22
14:58:18	1179.46	1092.1	98.2856	589.727	502.359	87.3648	0	0	0	0.291731	0.228886	-0.000587757	0.289696	0.256126	0.00551587	-0.00144678	0.522573	0.112714	0.11615	0.0562438	TRUE	TRUE	FALSE	FALSE	379.41	427.63	4.88	5.92	7.02	3.01	1.1	21.15	15.54	0	0.14	22
14:58:19	1179.46	1092.1	98.2856	589.727	502.359	87.3648	0	0	0	0.291844	0.229112	-0.000361696	0.289583	0.256126	0.00542545	-0.00153721	0.523477	0.112262	0.116104	0.0563342	TRUE	TRUE	FALSE	FALSE	379.41	427.63	4.88	5.92	7.02	2.99	1.1	21.15	15.54	0	0.14	22
14:58:20	1179.46	1092.1	98.2856	589.727	502.359	87.3648	0	0	0	0.29207	0.229338	-0.000723393	0.289696	0.256126	0.00538023	-0.00153721	0.523658	0.11199	0.116331	0.056289	TRUE	TRUE	FALSE	FALSE	378	427.63	4.88	5.92	7.02	2.99	1.1	21.15	15.52	0	0.14	22
14:58:21	1179.46	1092.1	98.2856	589.727	502.359	87.3648	0	0	0	0.291957	0.229338	-0.000632969	0.289583	0.256013	0.00542545	-0.001492	0.52411	0.111357	0.116331	0.0563342	TRUE	TRUE	FALSE	FALSE	378	427.63	4.87	5.92	7.02	2.97	1.09	21.15	15.52	0	0.14	22
14:58:22	1179.46	1092.1	87.3648	600.648	502.359	98.2856	0	0	0	0.29207	0.229451	-0.000542545	0.289583	0.256126	0.00542545	-0.00153721	0.524924	0.110815	0.116466	0.0563342	TRUE	TRUE	FALSE	FALSE	378	427.63	4.87	5.92	7.02	2.97	1.09	21.15	15.52	0	0.14	22
14:58:23	1179.46	1092.1	98.2856	589.727	502.359	87.3648	0	0	0	0.29207	0.229338	-0.000542545	0.289244	0.2559	0.00542545	-0.001492	0.524833	0.110498	0.116557	0.0562438	TRUE	TRUE	FALSE	FALSE	378	427.63	4.87	5.92	7.02	2.97	1.09	21.15	15.52	0	0.14	22
14:58:24	1179.46	1092.1	98.2856	589.727	502.359	87.3648	0	0	0	0.292183	0.229451	-0.000497333	0.288905	0.255674	0.00547066	-0.001492	0.525692	0.110182	0.116511	0.056289	TRUE	TRUE	FALSE	FALSE	378	425.97	4.87	5.92	7.02	2.97	1.09	21.15	15.52	0	0.14	22
14:58:25	1179.46	1092.1	98.2856	589.727	491.438	87.3648	0	0	0	0.292522	0.229677	-0.000542545	0.289018	0.255561	0.00547066	-0.00153721	0.526551	0.109549	0.116873	0.056289	TRUE	TRUE	FALSE	FALSE	378	425.97	4.87	5.91	6.93	2.97	1.09	21.15	15.52	0	0.14	22
14:58:26	1168.54	1092.1	98.2856	589.727	502.359	87.3648	0	0	0	0.29207	0.229451	-0.00045212	0.289018	0.255561	0.00542545	-0.00153721	0.526913	0.109006	0.116647	0.0563342	TRUE	TRUE	FALSE	FALSE	378	425.84	4.87	5.91	6.93	2.97	1.09	21.15	15.52	0	0.14	22
14:58:27	1179.46	1092.1	98.2856	589.727	502.359	87.3648	0	0	0	0.29207	0.229338	-0.000316484	0.288792	0.255561	0.00547066	-0.001492	0.527455	0.108599	0.116964	0.0563342	TRUE	TRUE	FALSE	FALSE	378	425.84	4.87	5.91	6.92	2.97	1.09	21.15	15.52	0	1.18	22
14:58:28	1179.46	1103.02	98.2856	589.727	502.359	87.3648	0	0	0	0.291957	0.229225	-0.000632969	0.288905	0.255448	0.00542545	-0.00158242	0.528179	0.108192	0.117099	0.0563342	TRUE	TRUE	FALSE	FALSE	378	425.71	4.87	5.91	6.92	2.97	1.09	21.15	15.52	0	1.18	22
14:58:29	1179.46	1092.1	98.2856	589.727	502.359	98.2856	0	0	0	0.291731	0.229112	-0.000587757	0.288679	0.255222	0.00542545	-0.00153721	0.52836	0.107786	0.11728	0.0562438	TRUE	TRUE	FALSE	FALSE	378	425.71	4.87	5.9	6.89	2.97	1.09	21.15	15.52	0	1.3	22
14:58:30	1179.46	1092.1	98.2856	589.727	502.359	87.3648	0	0	0	0.291957	0.229338	-0.000587757	0.288679	0.255222	0.00542545	-0.00153721	0.528948	0.10756	0.117461	0.0563342	TRUE	TRUE	FALSE	FALSE	378	425.49	4.87	5.9	6.89	2.97	1.09	21.15	15.52	0	1.3	22
14:58:31	1179.46	1092.1	98.2856	589.727	502.359	87.3648	0	0	0	0.291844	0.229112	-0.00045212	0.288566	0.254996	0.00547066	-0.001492	0.529535	0.107243	0.117325	0.0563342	TRUE	TRUE	FALSE	FALSE	378	425.49	4.87	5.9	6.87	2.97	1.09	21.14	15.52	0	1.36	22
14:58:32	1179.46	1092.1	98.2856	600.648	502.359	87.3648	0	0	0	0.291731	0.228999	-0.000361696	0.288453	0.254883	0.00547066	-0.001492	0.529761	0.106746	0.117461	0.056289	TRUE	TRUE	FALSE	FALSE	378	425.49	4.87	5.9	6.87	2.97	1.09	21.14	15.52	0	1.36	22
14:58:33	1179.46	1092.1	98.2856	589.727	502.359	87.3648	0	0	0	0.291844	0.229112	-0.000406908	0.28834	0.254883	0.00542545	-0.00153721	0.530439	0.106248	0.117371	0.056289	TRUE	TRUE	FALSE	FALSE	378	425.49	4.87	5.9	6.87	2.97	1.09	21.14	15.52	0	1.36	22
14:58:34	1179.46	1092.1	98.2856	589.727	502.359	87.3648	0	0	0	0.291957	0.229338	-0.00045212	0.288227	0.25477	0.00542545	-0.001492	0.530982	0.105706	0.117506	0.0563342	TRUE	TRUE	FALSE	FALSE	372.62	425.49	4.87	5.9	6.87	2.97	1.09	21.14	15.52	0	1.36	22
14:58:35	1168.54	1092.1	98.2856	589.727	502.359	87.3648	0	0	0	0.291844	0.229225	-0.000361696	0.288227	0.25477	0.00547066	-0.001492	0.531253	0.10557	0.117823	0.0562438	TRUE	TRUE	FALSE	FALSE	372.62	425.49	4.86	5.9	6.87	2.84	1.09	21.14	15.52	0	1.36	22
14:58:36	1179.46	1092.1	98.2856	589.727	502.359	87.3648	0	0	0	0.291844	0.229112	-0.000271272	0.288227	0.25477	0.00542545	-0.00158242	0.532248	0.105299	0.117958	0.056289	TRUE	TRUE	FALSE	FALSE	372.26	425.49	4.86	5.9	6.87	2.84	1.09	21.14	15.46	0	1.36	22
14:58:37	1179.46	1092.1	98.2856	589.727	502.359	98.2856	0	0	0	0.292409	0.229451	-0.000542545	0.288227	0.254544	0.00542545	-0.001492	0.53261	0.104756	0.117958	0.0563794	TRUE	TRUE	FALSE	FALSE	372.26	425.49	4.85	5.9	6.87	2.85	1.09	21.14	15.46	0	1.36	22
14:58:38	1179.46	1103.02	98.2856	589.727	502.359	87.3648	0	0	0	0.291957	0.229112	-0.000271272	0.288001	0.254657	0.00542545	-0.001492	0.533288	0.104349	0.118003	0.0563342	TRUE	TRUE	FALSE	FALSE	369.65	425.49	4.85	5.9	6.87	2.85	1.09	21.14	15.45	0	1.36	22
14:58:39	1179.46	1092.1	87.3648	589.727	491.438	87.3648	0	0	0	0.291844	0.229225	-0.000542545	0.288114	0.254657	0.00542545	-0.001492	0.533649	0.104033	0.118139	0.0563342	TRUE	TRUE	FALSE	FALSE	369.65	425.49	4.85	5.9	6.87	2.86	1.09	21.14	15.45	0	1.36	22
14:58:40	1179.46	1092.1	98.2856	589.727	502.359	87.3648	0	0	0	0.291844	0.229225	-0.000542545	0.287888	0.254431	0.00551587	-0.001492	0.534373	0.103581	0.118275	0.0563342	TRUE	TRUE	FALSE	FALSE	371.12	425.49	4.85	5.9	6.87	2.86	1.09	21.14	15.45	0	1.36	22
14:58:41	1179.46	1092.1	98.2856	589.727	502.359	87.3648	0	0	0	0.291844	0.229338	-0.000361696	0.287775	0.254431	0.00547066	-0.001492	0.534644	0.103219	0.118275	0.0563342	TRUE	TRUE	FALSE	FALSE	371.12	425.49	4.85	5.9	6.87	2.88	1.09	21.14	15.45	0	1.36	22
14:58:42	1179.46	1092.1	98.2856	589.727	502.359	87.3648	0	0	0	0.292296	0.229338	-0.000361696	0.287775	0.254318	0.00547066	-0.001492	0.535277	0.102812	0.11841	0.0563342	TRUE	TRUE	FALSE	FALSE	371.12	425.49	4.85	5.9	6.87	2.88	1.09	21.14	15.44	0	1.36	22
14:58:43	1168.54	1092.1	98.2856	600.648	502.359	87.3648	0	0	0	0.29207	0.229451	-0.000406908	0.287549	0.254318	0.00547066	-0.00153721	0.535548	0.102315	0.118546	0.0563342	TRUE	TRUE	FALSE	FALSE	371.12	425.49	4.85	5.9	6.87	2.88	1.1	21.14	15.44	0	1.36	22
14:58:44	1179.46	1092.1	98.2856	589.727	502.359	87.3648	0	0	0	0.29207	0.229338	-4.52e-05	0.287549	0.254318	0.00542545	-0.001492	0.536633	0.101953	0.118772	0.0563342	TRUE	TRUE	FALSE	FALSE	371.12	423.93	4.85	5.9	6.87	2.88	1.1	21.14	15.44	0	1.36	22
14:58:45	1179.46	1092.1	98.2856	589.727	502.359	87.3648	0	0	0	0.292183	0.229338	-0.00022606	0.287775	0.254092	0.00547066	-0.001492	0.537221	0.101637	0.118862	0.0563794	TRUE	TRUE	FALSE	FALSE	371.12	423.93	4.85	5.89	6.94	2.88	1.1	21.14	15.44	0	1.36	22
14:58:46	1179.46	1092.1	98.2856	589.727	502.359	87.3648	0	0	0	0.29207	0.229451	-0.00022606	0.287436	0.253979	0.00542545	-0.001492	0.537312	0.101275	0.118953	0.056289	TRUE	TRUE	FALSE	FALSE	371.12	423.7	4.85	5.89	6.94	2.88	1.1	21.14	15.44	0	1.62	22
14:58:47	1179.46	1103.02	98.2856	589.727	502.359	87.3648	0	0	0	0.29207	0.229451	-0.000361696	0.28721	0.254092	0.00547066	-0.00153721	0.538035	0.100959	0.118998	0.056289	TRUE	TRUE	FALSE	FALSE	371.12	423.7	4.85	5.89	6.95	2.88	1.09	21.14	15.44	0	1.62	22
14:58:48	1179.46	1092.1	98.2856	589.727	502.359	98.2856	0	0	0	0.292183	0.229338	-0.000497333	0.28721	0.253866	0.00547066	-0.00153721	0.538171	0.100461	0.118998	0.0563342	TRUE	TRUE	FALSE	FALSE	371.12	423.46	4.85	5.89	6.95	2.88	1.09	21.14	15.44	0	1.64	22
14:58:49	1179.46	1092.1	98.2856	600.648	502.359	87.3648	0	0	0	0.293087	0.230242	-0.000316484	0.287096	0.25364	0.00547066	-0.00153721	0.539075	0.100009	0.119134	0.056289	TRUE	FALSE	FALSE	FALSE	371.12	423.46	4.85	5.89	6.95	2.88	1.09	21.14	15.44	0	1.66	22
14:58:50	1179.46	1092.1	98.2856	567.885	502.359	87.3648	0	0	0	0.29207	0.229338	-0.000316484	0.131341	0.126255	0.00547066	-0.001492	0.539572	0.0997378	0.119134	0.0563342	TRUE	FALSE	FALSE	FALSE	371.12	423.31	4.85	5.89	6.95	2.88	1.09	21.14	15.44	0	1.66	22
14:58:51	1179.46	1092.1	98.2856	76.4441	382.228	0	0	0	0	0.291957	0.229112	-0.000180848	0.0446469	0.0436296	0.00542545	-0.00153721	0.540115	0.100054	0.119269	0.056289	TRUE	FALSE	FALSE	FALSE	371.12	423.31	4.85	5.89	6.94	2.88	1.09	21.13	15.44	0	1.69	22
14:58:52	1179.46	1092.1	98.2856	0	207.494	0	0	0	0	0.291957	0.229225	-0.000135636	0.0204584	0.0195542	0.00538023	-0.001492	0.540341	0.100371	0.119405	0.056289	TRUE	FALSE	FALSE	FALSE	371.12	423.31	4.85	5.89	6.94	2.88	1.09	21.13	15.44	0	1.69	22
14:58:53	1179.46	1092.1	87.3648	0	120.127	0	0	0	0	0.291957	0.229225	-0.000271272	0.0107379	0.00983362	0.00538023	-0.001492	0.541064	0.100371	0.119541	0.0563794	TRUE	FALSE	FALSE	FALSE	371.12	423.31	4.85	5.89	6.94	2.88	1.09	21.14	15.44	0	1.69	22
14:58:54	1168.54	1092.1	98.2856	0	76.4441	0	0	0	0	0.291957	0.229225	-0.000271272	0.00576454	0.00452121	0.00533502	-0.00153721	0.541607	0.100461	0.119495	0.0563342	TRUE	FALSE	FALSE	FALSE	370.72	423.31	4.85	5.89	6.94	2.88	1.09	21.14	15.44	0	1.69	22
14:58:55	1179.46	1092.1	98.2856	0	21.8408	0	0	0	0	0.292183	0.229338	-0.000271272	0.00384302	0.00203454	0.00542545	-0.00153721	0.542285	0.100371	0.119586	0.0563342	TRUE	FALSE	FALSE	FALSE	370.72	423.31	4.85	5.89	6.94	0	1.09	21.14	15.44	0	1.69	22
14:58:56	1179.46	1092.1	98.2856	0	0	0	0	0	0	0.29207	0.229225	-0.000361696	0.00293878	0.000904241	0.00542545	-0.00153721	0.542873	0.100868	0.119495	0.0563342	TRUE	FALSE	FALSE	FALSE	371.79	423.31	4.83	5.89	6.94	0	1.09	21.14	15.37	0	1.69	21.9
14:58:57	1179.46	1092.1	98.2856	0	0	0	0	0	0	0.291957	0.228999	-0.000135636	0.00248666	0.000565151	0.00538023	-0.00153721	0.542873	0.100823	0.119676	0.0563794	TRUE	FALSE	FALSE	FALSE	371.79	423.31	4.83	5.89	6.94	0	1.09	21.07	15.37	0	1.69	21.9
14:58:58	1179.46	1092.1	98.2856	0	0	0	0	0	0	0.291957	0.228999	-0.000406908	0.00237363	0.00033909	0.00538023	-0.00153721	0.543596	0.100959	0.119631	0.0563794	TRUE	FALSE	FALSE	FALSE	370.91	423.31	4.84	5.89	6.94	0	1.09	21.07	15.36	0	1.69	21.9
14:58:59	1179.46	1103.02	98.2856	0	0	0	0	0	0	0.291957	0.228999	-0.000361696	0.00214757	0.00011303	0.00538023	-0.00153721	0.544003	0.100913	0.119676	0.0563342	TRUE	FALSE	FALSE	FALSE	370.91	423.31	4.84	5.89	6.94	0	1.09	21.07	15.36	0	1.69	21.9
14:59:00	1179.46	1092.1	98.2856	0	0	0	0	0	0	0.29207	0.229225	-0.00022606	0.00214757	0.00011303	0.00538023	-0.00153721	0.544772	0.101139	0.119541	0.0563794	TRUE	FALSE	FALSE	FALSE	370.91	423.31	4.84	5.89	6.94	0	1.09	21.07	15.36	0	1.69	21.9
14:59:01	1168.54	1092.1	98.2856	0	0	0	0	0	0	0.29207	0.229338	-0.00045212	0.00203454	0	0.00538023	-0.001492	0.546173	0.101185	0.119586	0.0563342	TRUE	FALSE	FALSE	FALSE	371.93	423.31	4.84	5.89	6.94	0	1.09	21.07	15.36	0	1.69	21.9
14:59:02	1179.46	1092.1	98.2856	0	0	0	0	0	0	0.292183	0.229112	-0.000406908	0.00192151	0.00011303	0.00538023	-0.00153721	0.546354	0.10123	0.119586	0.0563342	TRUE	FALSE	FALSE	FALSE	371.93	423.31	4.83	5.89	6.94	0	1.09	21.07	15.35	0	1.69	21.9
14:59:03	1179.46	1092.1	98.2856	0	0	0	0	0	0	0.291844	0.229112	-0.00045212	0.00203454	0	0.00538023	-0.00153721	0.545631	0.101275	0.119586	0.0563342	TRUE	FALSE	FALSE	FALSE	371.93	423.31	4.83	5.89	6.94	0	1.09	21.07	15.35	0	1.69	21.9
14:59:04	1179.46	1092.1	87.3648	0	0	0	0	0	0	0.291957	0.229225	-0.000135636	0.00214757	-0.00011303	0.00542545	-0.00153721	0.546083	0.101411	0.119495	0.0563794	TRUE	FALSE	FALSE	FALSE	371.93	423.31	4.83	5.89	6.94	0	1.09	21.07	15.35	0	1.69	21.9
14:59:05	1179.46	1092.1	98.2856	0	0	0	0	0	0	0.291957	0.228886	-0.000406908	0.00203454	-0.00011303	0.00538023	-0.001492	0.547304	0.101365	0.119541	0.0563342	TRUE	FALSE	FALSE	FALSE	371.93	422.73	4.83	5.9	6.93	0	1.09	21.07	15.35	0	1.69	21.9
14:59:06	1179.46	1092.1	98.2856	0	0	0	0	0	0	0.291844	0.228999	-0.00022606	0.00203454	0.00011303	0.00538023	-0.00153721	0.546399	0.101546	0.119541	0.056289	TRUE	FALSE	FALSE	FALSE	371.93	422.73	4.83	5.9	6.93	0	1.09	21.07	15.35	0	1.97	21.9
14:59:07	1179.46	1092.1	98.2856	0	0	0	0	0	0	0.291957	0.229225	-0.000406908	0.00203454	0.00011303	0.00538023	-0.00153721	0.547168	0.101592	0.119586	0.056289	TRUE	FALSE	FALSE	FALSE	371.93	422.6	4.83	5.9	6.94	0	1.09	21.07	15.35	0	1.97	21.9
14:59:08	1179.46	1092.1	98.2856	0	0	0	0	0	0	0.29207	0.229225	-0.00022606	0.00214757	0.00022606	0.00538023	-0.00153721	0.54771	0.101772	0.119586	0.0563342	TRUE	FALSE	FALSE	FALSE	371.93	422.6	4.83	5.9	6.94	0	1.09	21.07	15.35	0	1.97	21.9
14:59:09	1179.46	1092.1	98.2856	0	0	0	0	0	0	0.291844	0.229225	-0.000180848	0.00214757	0.00011303	0.00538023	-0.00153721	0.548027	0.101772	0.119541	0.056289	TRUE	FALSE	FALSE	FALSE	371.93	422.37	4.83	5.9	6.94	0	1.09	21.07	15.35	0	1.97	21.9
14:59:10	1179.46	1092.1	98.2856	0	0	0	0	0	0	0.291957	0.229112	-0.000135636	0.00203454	0.00011303	0.00547066	-0.00153721	0.548298	0.101772	0.119541	0.056289	TRUE	FALSE	FALSE	FALSE	371.93	422.37	4.83	5.9	6.94	0	1.09	21.07	15.35	0	1.97	21.9
14:59:11	1179.46	1092.1	98.2856	0	0	0	0	0	0	0.291957	0.229225	-9.04e-05	0.00214757	0.00011303	0.00542545	-0.001492	0.548841	0.101998	0.119495	0.0563342	TRUE	FALSE	FALSE	FALSE	371.93	422.22	4.83	5.9	6.94	0	1.09	21	15.35	0	1.97	21.9
14:59:12	1168.54	1092.1	98.2856	0	0	0	0	0	0	0.291844	0.229451	-0.000316484	0.00214757	0.00045212	0.00538023	-0.001492	0.549022	0.10227	0.119586	0.056289	TRUE	FALSE	FALSE	FALSE	371.93	422.22	4.83	5.9	6.94	0	1.09	21	15.35	0	1.97	21.9
14:59:13	1179.46	1092.1	98.2856	0	0	0	0	0	0	0.292183	0.229451	-0.000271272	0.00282575	0.00146939	0.00542545	-0.001492	0.549202	0.102224	0.119586	0.0563342	TRUE	FALSE	FALSE	FALSE	371.93	422.22	4.83	5.9	6.94	0	1.09	21	15.35	0	1.97	21.9
14:59:14	1179.46	1092.1	87.3648	0	0	0	0	0	0	0.29207	0.229564	-9.04e-05	0.00384302	0.00237363	0.00542545	-0.00153721	0.549881	0.102134	0.119495	0.0563342	TRUE	FALSE	FALSE	FALSE	371.93	422.22	4.83	5.9	6.94	0	1.09	21	15.35	0	1.97	21.9
14:59:15	1179.46	1092.1	98.2856	0	0	0	0	0	0	0.29207	0.229564	-0.00022606	0.00440817	0.00350393	0.00542545	-0.00153721	0.550016	0.102405	0.119495	0.056289	TRUE	FALSE	FALSE	FALSE	371.68	422.22	4.83	5.9	6.94	0	1.09	21	15.35	0	1.97	21.9
14:59:16	1179.46	1103.02	98.2856	0	0	0	0	0	0	0.29207	0.229338	-9.04e-05	0.00508635	0.00474726	0.00542545	-0.001492	0.550875	0.102496	0.119586	0.0563342	TRUE	FALSE	FALSE	FALSE	371.68	422.22	4.81	5.9	6.94	0	1.09	21	15.29	0	1.97	21.9
14:59:17	1179.46	1092.1	98.2856	0	0	0	0	0	0	0.291957	0.229451	-9.04e-05	0.00655575	0.00655575	0.00542545	-0.001492	0.551192	0.102541	0.119586	0.0562438	TRUE	FALSE	FALSE	FALSE	372.29	422.22	4.81	5.9	6.94	0	1.09	21.01	15.29	0	1.97	21.9
14:59:18	1168.54	1092.1	98.2856	0	0	0	0	0	0	0.291844	0.229338	-0.000135636	0.00791211	0.00791211	0.00538023	-0.00153721	0.551734	0.102767	0.119541	0.0563342	TRUE	FALSE	FALSE	FALSE	372.29	422.22	4.81	5.9	6.94	0	1.09	21.01	15.29	0	1.97	21.9
14:59:19	1179.46	1092.1	98.2856	0	0	0	0	0	0	0.291844	0.229225	-4.52e-05	0.00870332	0.00859029	0.00538023	-0.00158242	0.551734	0.102857	0.119586	0.0563342	TRUE	FALSE	FALSE	FALSE	373.49	422.22	4.81	5.9	6.94	0	1.09	21.01	15.28	0	1.97	21.9
14:59:20	1179.46	1092.1	98.2856	0	0	0	0	0	0	0.29207	0.229338	-0.000316484	0.00892938	0.00881635	0.00538023	-0.00153721	0.552141	0.102993	0.119586	0.0563794	TRUE	FALSE	FALSE	FALSE	373.49	422.22	4.81	5.9	6.94	0	1.09	21.01	15.28	0	1.97	21.9
14:59:21	1179.46	1092.1	98.2856	0	0	0	0	0	0	0.29207	0.229225	0	0.00904241	0.00881635	0.00547066	-0.001492	0.552729	0.103174	0.119676	0.056289	TRUE	FALSE	FALSE	FALSE	372.48	422.22	4.81	5.9	6.94	0	1.08	21.01	15.27	0	1.97	21.9
14:59:22	1179.46	1092.1	98.2856	0	0	0	0	0	0	0.291844	0.229564	-0.00022606	0.00881635	0.00881635	0.00542545	-0.001492	0.553226	0.103355	0.119586	0.0563794	TRUE	FALSE	FALSE	FALSE	372.48	422.22	4.8	5.9	6.94	0	1.08	21.01	15.27	0	1.97	21.9
14:59:23	1179.46	1092.1	98.2856	0	0	0	0	0	0	0.291957	0.229112	-9.04e-05	0.00881635	0.00881635	0.00538023	-0.00153721	0.554311	0.103309	0.119586	0.0563342	TRUE	FALSE	FALSE	FALSE	372.48	422.22	4.8	5.9	6.94	0	1.09	21.01	15.26	0	1.97	21.9
14:59:24	1168.54	1092.1	87.3648	0	0	0	0	0	0	0.291844	0.229225	-0.00045212	0.00881635	0.00881635	0.00538023	-0.00153721	0.55395	0.103581	0.119541	0.056289	TRUE	FALSE	FALSE	FALSE	372.48	422.22	4.8	5.9	6.94	0	1.09	21.01	15.26	0	1.97	21.9
14:59:25	1190.38	1092.1	98.2856	0	0	0	0	0	0	0.291957	0.228999	-0.00022606	0.00892938	0.00881635	0.00538023	-0.001492	0.553407	0.103671	0.119586	0.056289	TRUE	FALSE	FALSE	FALSE	372.48	420.8	4.8	5.9	6.94	0	1.09	21.01	15.26	0	1.97	21.9
14:59:26	1168.54	1092.1	98.2856	0	0	0	0	0	0	0.291844	0.229338	-0.000316484	0.00892938	0.00870332	0.00538023	-0.001492	0.554583	0.103671	0.119676	0.0563342	TRUE	FALSE	FALSE	FALSE	372.48	420.8	4.8	5.9	6.94	0	1.09	21.01	15.26	0	1.97	21.9
14:59:27	1179.46	1092.1	98.2856	0	0	0	0	0	0	0.291957	0.229225	-0.000180848	0.00881635	0.00881635	0.00538023	-0.00153721	0.554492	0.103897	0.119586	0.0563342	TRUE	FALSE	FALSE	FALSE	372.48	420.69	4.8	5.9	6.94	0	1.09	21.01	15.26	0	1.97	21.9
14:59:28	1179.46	1092.1	98.2856	0	0	0	0	0	0	0.292183	0.229338	-0.000180848	0.00904241	0.00870332	0.00542545	-0.00153721	0.555035	0.104033	0.119541	0.0563342	TRUE	FALSE	FALSE	FALSE	372.48	420.69	4.8	5.91	6.94	0	1.09	21.01	15.26	0	1.97	21.9
14:59:29	1179.46	1092.1	98.2856	0	0	0	0	0	0	0.291731	0.229225	-9.04e-05	0.00881635	0.00870332	0.00538023	-0.00153721	0.555532	0.104033	0.119586	0.056289	TRUE	FALSE	FALSE	FALSE	372.48	420.44	4.8	5.91	6.94	0	1.09	21.01	15.26	0	1.97	21.9
14:59:30	1168.54	1103.02	98.2856	0	0	0	0	0	0	0.291731	0.229225	-0.00022606	0.00881635	0.00870332	0.00538023	-0.00158242	0.556391	0.104259	0.119586	0.0563794	TRUE	FALSE	FALSE	FALSE	372.48	420.44	4.8	5.91	6.94	0	1.09	21.01	15.26	0	1.98	21.9
14:59:31	1179.46	1092.1	98.2856	0	0	0	0	0	0	0.292409	0.229677	-9.04e-05	0.00904241	0.00881635	0.00538023	-0.001492	0.555577	0.104304	0.119676	0.0563794	TRUE	FALSE	FALSE	FALSE	372.48	420.25	4.8	5.91	6.94	0	1.09	21	15.26	0	1.98	22
14:59:32	1179.46	1092.1	98.2856	0	0	0	0	0	0	0.29207	0.229338	-0.00022606	0.00904241	0.00881635	0.00538023	-0.00153721	0.556436	0.104621	0.119586	0.0563342	TRUE	FALSE	FALSE	FALSE	372.48	420.25	4.8	5.91	6.94	0	1.09	21	15.26	0	1.98	21.9
14:59:33	1179.46	1092.1	98.2856	0	0	0	0	0	0	0.292296	0.229677	-0.000406908	0.00892938	0.00870332	0.00542545	-0.00153721	0.557657	0.104621	0.119541	0.0563342	TRUE	FALSE	FALSE	FALSE	372.48	420.25	4.8	5.91	6.94	0	1.09	21	15.26	0	1.98	21.9
14:59:34	1179.46	1092.1	87.3648	0	0	0	0	0	0	0.292183	0.229451	-0.000135636	0.00881635	0.00870332	0.00542545	-0.00153721	0.55725	0.10453	0.119495	0.0563342	TRUE	FALSE	FALSE	FALSE	372.48	420.25	4.8	5.91	6.94	0	1.09	21	15.26	0	1.98	21.9
14:59:35	1179.46	1092.1	98.2856	0	0	0	0	0	0	0.291957	0.229338	-9.04e-05	0.00892938	0.00859029	0.00542545	-0.00153721	0.557612	0.105118	0.119586	0.056289	TRUE	FALSE	FALSE	FALSE	369.65	420.25	4.8	5.91	6.94	0	1.09	21	15.26	0	1.98	21.9
14:59:36	1179.46	1092.1	98.2856	0	0	0	0	0	0	0.291957	0.229338	-4.52e-05	0.00881635	0.00870332	0.00542545	-0.001492	0.557793	0.104802	0.119676	0.0563342	TRUE	FALSE	FALSE	FALSE	369.65	420.25	4.78	5.91	6.94	0	1.09	21.01	15.26	0	1.98	21.9
14:59:37	1179.46	1092.1	98.2856	0	0	0	0	0	0	0.29207	0.229112	-0.000180848	0.00881635	0.00881635	0.00538023	-0.001492	0.558109	0.105163	0.119495	0.0563794	TRUE	FALSE	FALSE	FALSE	369.87	420.25	4.78	5.91	6.94	0	1.09	21.01	15.13	0	1.98	21.9
14:59:38	1179.46	1092.1	98.2856	0	0	0	0	0	0	0.291844	0.228886	-4.52e-05	0.00870332	0.00859029	0.00538023	-0.001492	0.5582	0.105344	0.119495	0.0563342	TRUE	FALSE	FALSE	FALSE	369.87	420.25	4.78	5.91	6.94	0	1.09	21.01	15.13	0	1.98	21.8
14:59:39	1168.54	1103.02	98.2856	0	0	0	0	0	0	0.291957	0.229112	-0.00045212	0.00859029	0.0082512	0.00538023	-0.00153721	0.558833	0.10548	0.119541	0.0563342	TRUE	FALSE	FALSE	FALSE	370.66	420.25	4.78	5.91	6.94	0	1.09	21.01	15.13	0	1.98	21.8
14:59:40	1179.46	1092.1	98.2856	0	0	0	0	0	0	0.291844	0.229225	0.000135636	0.00859029	0.0082512	0.00538023	-0.001492	0.559059	0.10548	0.119586	0.0563794	TRUE	FALSE	FALSE	FALSE	370.66	420.25	4.77	5.91	6.94	0	1.09	21.01	15.13	0	1.98	21.7
14:59:41	1179.46	1092.1	98.2856	0	0	0	0	0	0	0.291957	0.229225	-0.000135636	0.00847726	0.0082512	0.00538023	-0.00153721	0.559511	0.105525	0.119721	0.0563794	TRUE	FALSE	FALSE	FALSE	371.48	420.25	4.77	5.91	6.94	0	1.09	21.01	15.12	0	1.98	21.7
14:59:42	1179.46	1092.1	98.2856	0	0	0	0	0	0	0.29207	0.229225	-0.000180848	0.0082512	0.00802514	0.00538023	-0.00153721	0.559963	0.105887	0.119541	0.0563342	TRUE	FALSE	FALSE	FALSE	371.48	420.25	4.78	5.91	6.94	0	1.09	21.01	15.12	0	1.98	21.7
14:59:43	1179.46	1092.1	87.3648	0	0	0	0	0	0	0.291957	0.228999	-0.000316484	0.00802514	0.00791211	0.00538023	-0.001492	0.560008	0.105841	0.119541	0.0563794	TRUE	FALSE	FALSE	FALSE	371.48	420.25	4.78	5.91	6.94	0	1.09	21.01	15.11	0	1.98	21.7
14:59:44	1179.46	1092.1	98.2856	0	0	0	0	0	0	0.29207	0.229225	-0.000135636	0.00802514	0.00791211	0.00538023	-0.001492	0.560144	0.105887	0.119721	0.0563342	TRUE	FALSE	FALSE	FALSE	371.48	420.25	4.78	5.91	6.94	0	1.09	21.01	15.11	0	1.98	21.7
14:59:45	1179.46	1092.1	98.2856	0	0	0	0	0	0	0.291957	0.229338	-0.000316484	0.00791211	0.00779908	0.00538023	-0.001492	0.561003	0.106022	0.119721	0.0563794	TRUE	FALSE	FALSE	FALSE	371.48	420.68	4.78	5.91	6.94	0	1.09	21.01	15.11	0	1.98	21.7
14:59:46	1168.54	1092.1	98.2856	0	0	0	0	0	0	0.292183	0.229677	-0.000180848	0.00779908	0.00779908	0.00542545	-0.00153721	0.560867	0.106203	0.119631	0.0563342	TRUE	FALSE	FALSE	FALSE	371.48	420.68	4.78	5.92	0	0	1.09	21.01	15.11	0	1.98	21.7
14:59:47	1179.46	1092.1	98.2856	0	0	0	0	0	0	0.29207	0.229338	-0.00022606	0.00779908	0.00745999	0.00542545	-0.001492	0.561093	0.106339	0.119586	0.0563342	TRUE	FALSE	FALSE	FALSE	371.48	420.5	4.78	5.92	0	0	1.09	21.01	15.11	0	1.98	21.7
14:59:48	1179.46	1092.1	98.2856	0	0	0	0	0	0	0.291844	0.229112	-0.000180848	0.00779908	0.00745999	0.00538023	-0.001492	0.561229	0.10661	0.119721	0.0563794	TRUE	FALSE	FALSE	FALSE	371.48	420.5	4.78	5.92	0	0	1.09	21.01	15.11	0	1.98	21.7
14:59:49	1168.54	1092.1	98.2856	0	0	0	0	0	0	0.291957	0.229451	-0.000180848	0.00768605	0.00745999	0.00542545	-0.001492	0.561681	0.1067	0.119631	0.0563342	TRUE	FALSE	FALSE	FALSE	371.48	420.26	4.78	5.92	0	0	1.09	21.01	15.11	0	1.98	21.7
14:59:50	1179.46	1092.1	98.2856	0	0	0	0	0	0	0.291957	0.229338	-9.04e-05	0.00768605	0.00734696	0.00538023	-0.00153721	0.562178	0.106926	0.119721	0.0563342	TRUE	FALSE	FALSE	FALSE	371.48	420.26	4.78	5.92	0	0	1.09	21.01	15.11	0	1.98	21.7
14:59:51	1179.46	1092.1	98.2856	0	0	0	0	0	0	0.292296	0.229564	-0.000180848	0.00768605	0.00723393	0.00538023	-0.001492	0.562088	0.106972	0.119541	0.0563342	TRUE	FALSE	FALSE	FALSE	371.48	420.13	4.78	5.92	0	0	1.09	21.01	15.11	0	1.98	21.7
14:59:52	1179.46	1092.1	87.3648	0	0	0	0	0	0	0.29207	0.229564	-0.000180848	0.00757302	0.0071209	0.00542545	-0.00153721	0.562495	0.107062	0.119586	0.0563794	TRUE	FALSE	FALSE	FALSE	371.48	420.13	4.78	5.92	0	0	1.09	21	15.11	0	1.99	21.7
14:59:53	1179.46	1103.02	98.2856	0	0	0	0	0	0	0.29207	0.228886	-9.04e-05	0.00734696	0.00700787	0.00542545	-0.001492	0.56254	0.107062	0.119721	0.0563342	TRUE	FALSE	FALSE	FALSE	371.48	420.13	4.78	5.92	0	0	1.09	21	15.11	0	1.99	21.7
14:59:54	1179.46	1092.1	98.2856	0	0	0	0	0	0	0.291844	0.229112	-9.04e-05	0.00723393	0.00689484	0.00542545	-0.001492	0.563083	0.107333	0.119676	0.0563342	TRUE	FALSE	FALSE	FALSE	371.48	420.13	4.78	5.92	0	0	1.09	21.01	15.11	0	1.99	21.7
14:59:55	1168.54	1092.1	98.2856	0	0	0	0	0	0	0.291844	0.229338	-4.52e-05	0.0071209	0.00678181	0.00542545	-0.001492	0.563399	0.107469	0.119586	0.0563342	TRUE	FALSE	FALSE	FALSE	371.92	420.13	4.78	5.92	0	0	1.09	21.01	15.11	0	1.99	21.7
14:59:56	1179.46	1092.1	98.2856	0	0	0	0	0	0	0.291731	0.229112	-0.000135636	0.00700787	0.00666878	0.00538023	-0.001492	0.563851	0.107695	0.119676	0.056289	TRUE	FALSE	FALSE	FALSE	371.92	420.13	4.75	5.92	0	0	1.09	21.01	15.11	0	1.99	21.7
14:59:57	1179.46	1092.1	98.2856	0	0	0	0	0	0	0.291844	0.229225	-9.04e-05	0.00700787	0.00666878	0.00538023	-0.001492	0.564168	0.10756	0.119721	0.0563342	TRUE	FALSE	FALSE	FALSE	371.65	420.13	4.75	5.92	0	0	1.09	21.01	15.05	0	1.99	21.7
14:59:58	1179.46	1092.1	98.2856	0	0	0	0	0	0	0.29207	0.229451	-9.04e-05	0.00689484	0.00644272	0.00538023	-0.001492	0.564529	0.107695	0.119721	0.0563342	TRUE	FALSE	FALSE	FALSE	371.65	420.13	4.75	5.92	0	0	1.09	21.01	15.05	0	1.99	21.7
14:59:59	1179.46	1092.1	87.3648	0	0	0	0	0	0	0.291844	0.229112	-4.52e-05	0.00666878	0.00621666	0.00538023	-0.001492	0.564484	0.107831	0.119631	0.0563342	TRUE	FALSE	FALSE	FALSE	372.37	420.13	4.75	5.92	0	0	1.09	21.01	15.04	0	1.99	21.7
15:00:00	1168.54	1092.1	98.2856	0	0	0	0	0	0	0.291957	0.229451	0	0.00666878	0.00621666	0.00538023	-0.00153721	0.565253	0.107966	0.119586	0.056289	TRUE	FALSE	FALSE	FALSE	372.37	420.13	4.75	5.92	0	0	1.09	21.01	15.04	0	1.99	21.7
15:00:01	1179.46	1092.1	98.2856	0	0	0	0	0	0	0.292522	0.229564	0	0.00666878	0.0059906	0.00538023	-0.00153721	0.565253	0.108057	0.119586	0.056289	TRUE	FALSE	FALSE	FALSE	372.23	420.13	4.75	5.92	0	0	1.09	21.01	15.04	0	1.99	21.7
15:00:02	1179.46	1092.1	98.2856	0	0	0	0	0	0	0.292296	0.229564	0	0.00644272	0.00587757	0.00538023	-0.001492	0.565434	0.108057	0.119495	0.0563794	TRUE	FALSE	FALSE	FALSE	372.23	420.13	4.74	5.92	0	0	1.09	21.01	15.04	0	1.99	21.7
15:00:03	1179.46	1092.1	98.2856	0	0	0	0	0	0	0.29207	0.229451	-0.000361696	0.00644272	0.00576454	0.00542545	-0.00153721	0.565976	0.108238	0.119676	0.0563794	TRUE	FALSE	FALSE	FALSE	372.23	420.13	4.74	5.92	0	0	1.09	21.01	15.03	0	1.99	21.7
15:00:04	1179.46	1103.02	98.2856	0	0	0	0	0	0	0.291957	0.229225	-0.000180848	0.00632969	0.00565151	0.00538023	-0.00153721	0.566293	0.108509	0.119586	0.0563794	TRUE	FALSE	FALSE	FALSE	372.23	420.13	4.74	5.92	0	0	1.09	21.01	15.03	0	1.99	21.7
15:00:05	1179.46	1092.1	98.2856	0	0	0	0	0	0	0.291957	0.229338	-4.52e-05	0.00610363	0.00565151	0.00538023	-0.001492	0.566247	0.108509	0.119676	0.0563342	TRUE	FALSE	FALSE	FALSE	372.23	418.73	4.74	5.92	0	0	1.09	21.01	15.03	0	1.99	21.7
15:00:06	1179.46	1092.1	98.2856	0	0	0	0	0	0	0.291844	0.229225	-0.000316484	0.00610363	0.00542545	0.00538023	-0.001492	0.566971	0.10878	0.119586	0.056289	TRUE	FALSE	FALSE	FALSE	372.23	418.73	4.74	5.94	0	0	1.09	21.01	15.03	0	1.99	21.7
15:00:07	1179.46	1092.1	87.3648	0	0	0	0	0	0	0.291957	0.229225	0	0.0059906	0.00542545	0.00538023	-0.00153721	0.567378	0.10869	0.119586	0.0563342	TRUE	FALSE	FALSE	FALSE	372.23	418.57	4.74	5.94	0	0	1.09	21.01	15.03	0	1.99	21.7
15:00:08	1179.46	1092.1	98.2856	0	0	0	0	0	0	0.292183	0.229225	-9.04e-05	0.00587757	0.00531242	0.00542545	-0.00153721	0.56783	0.109006	0.119541	0.0563342	TRUE	FALSE	FALSE	FALSE	372.23	418.57	4.74	5.94	0	0	1.09	21.01	15.03	0	1.98	21.7
15:00:09	1179.46	1092.1	98.2856	0	0	0	0	0	0	0.29207	0.229564	9.04e-05	0.00576454	0.00508635	0.00542545	-0.00153721	0.56792	0.109187	0.119586	0.0563342	TRUE	FALSE	FALSE	FALSE	372.23	418.44	4.74	5.94	0	0	1.09	21.01	15.03	0	1.98	21.7
15:00:10	1179.46	1092.1	98.2856	0	0	0	0	0	0	0.29207	0.229338	-4.52e-05	0.00565151	0.00519938	0.00538023	-0.00153721	0.568282	0.109232	0.119676	0.0563342	TRUE	FALSE	FALSE	FALSE	372.23	418.44	4.74	5.94	0	0	1.09	21.01	15.03	0	1.98	21.7
15:00:11	1168.54	1092.1	98.2856	0	0	0	0	0	0	0.292183	0.229451	4.52e-05	0.00565151	0.00508635	0.00542545	-0.001492	0.56887	0.109187	0.119676	0.0563342	TRUE	FALSE	FALSE	FALSE	372.23	418.24	4.74	5.94	0	0	1.09	21.01	15.03	0	1.98	21.7
[truncated: 3,403 more rows]
